# Supplementary material for: A concise/catalytic approach for the construction of the C14–C28 fragment of eribulin
Source: Royal Society of Chemistry journal article supplement (doi:10.1039/d1ob00661d), 2021-01-01

# Electronic Supplementary Information

## A Concise/Catalytic Approach for the Construction of the C14–C28 Fragment of Eribulin

Sivadatta Senapati,<sup>a,b</sup> and Chepuri V. Ramana\*<sup>a,b</sup>

a) Division of Organic Chemistry, CSIR-National Chemical Laboratory

Dr. Homi Bhabha Road, Pune – 411 008, India

b) Academy of Scientific and Innovative Research (AcSIR), Ghaziabad- 201002, India

Email: [vr.chepuri@ncl.res.in](mailto:vr.chepuri@ncl.res.in)

- General Information and Comparison Table S02
- NMR Spectra S03 – S97

**Figure S1. Comparison of the  $^{13}\text{C}$  NMR Chemical Shift THF units<sup>1</sup>**

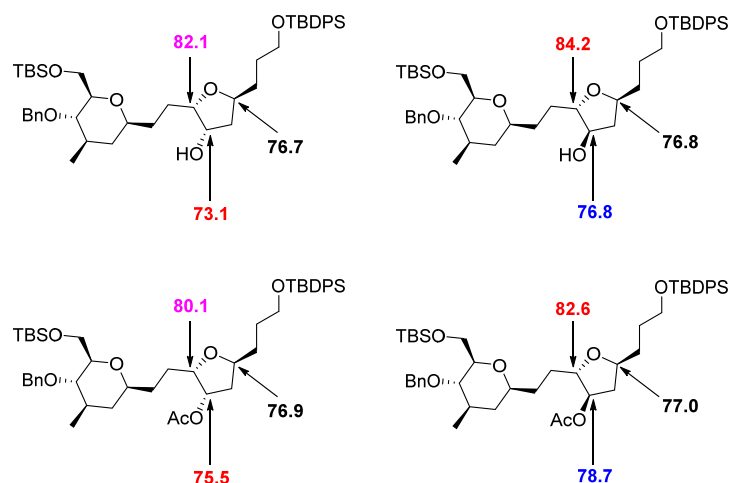

Characteristics  $^{13}\text{C}$  NMR Chemical Shift values for the 2-hydroxy-tetrahydrofuran rings.<sup>1</sup>

- 1,2-*cis*-hydroxy (trans fused) = 83 ppm (C1) and 73 ppm (C2-OH)
- 1,2-*trans*-hydroxy (trans fused) = 86 ppm (C1) and 74 ppm (C2-OH)

**Table S1. Comparison of  $^{13}\text{C}$  NMR Chemical Shift values**

| Position | 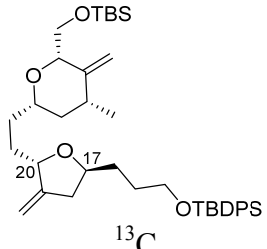 |  |  |
|----------|-------------------------------------------------------------------------------------|--------------------------------------------------------------------------------------|---------------------------------------------------------------------------------------|
| 17       | 77.0                                                                                | ~77                                                                                  | 77.7                                                                                  |
| 18       | 38.9                                                                                | —                                                                                    | —                                                                                     |
| 19       | 151.8                                                                               | 151.5                                                                                | 150.9                                                                                 |
| 20       | 79.5                                                                                | 79.9                                                                                 | 79.9                                                                                  |

## References

1. V. Mullapudi, I. Ahmad, S. Senapati, C. V. Ramana, *ACS Omega* 2020, **5**, 25334.
2. A. S. Murthy, B. Mahipal, S. Chandrasekhar, *Eur. J. Org. Chem.* 2012, 6959.
3. F. Belanger, C. E. Chase, A. Endo, F. G. Fang, J. Li, S. R. Mathieu, A. Z. Wilcoxon, H. Zhang, *Angew. Chem. Int. Ed.* 2015, **54**, 1.

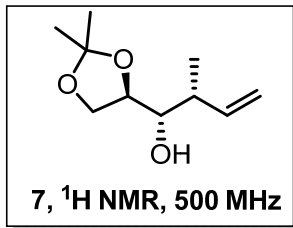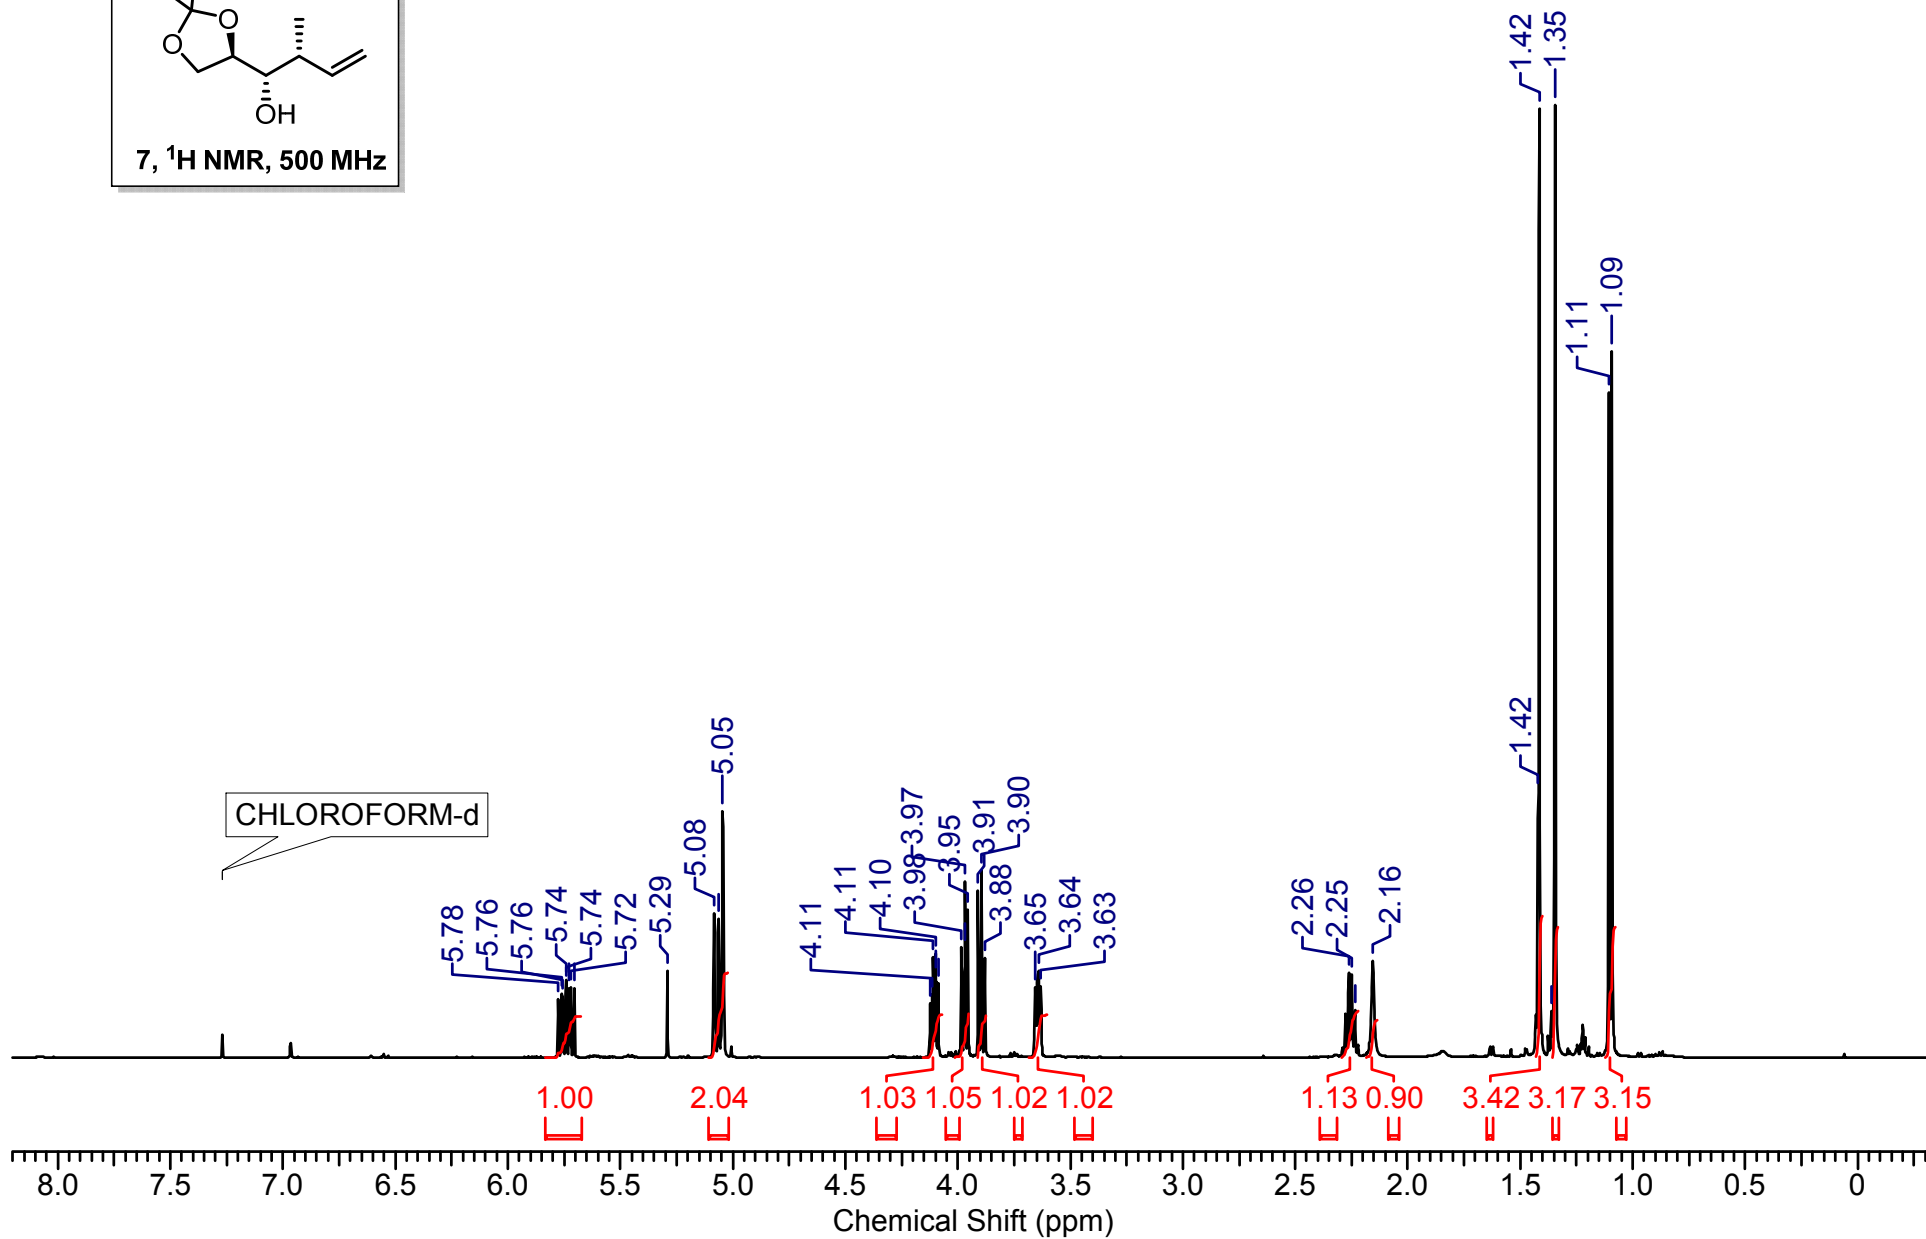

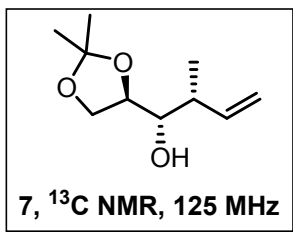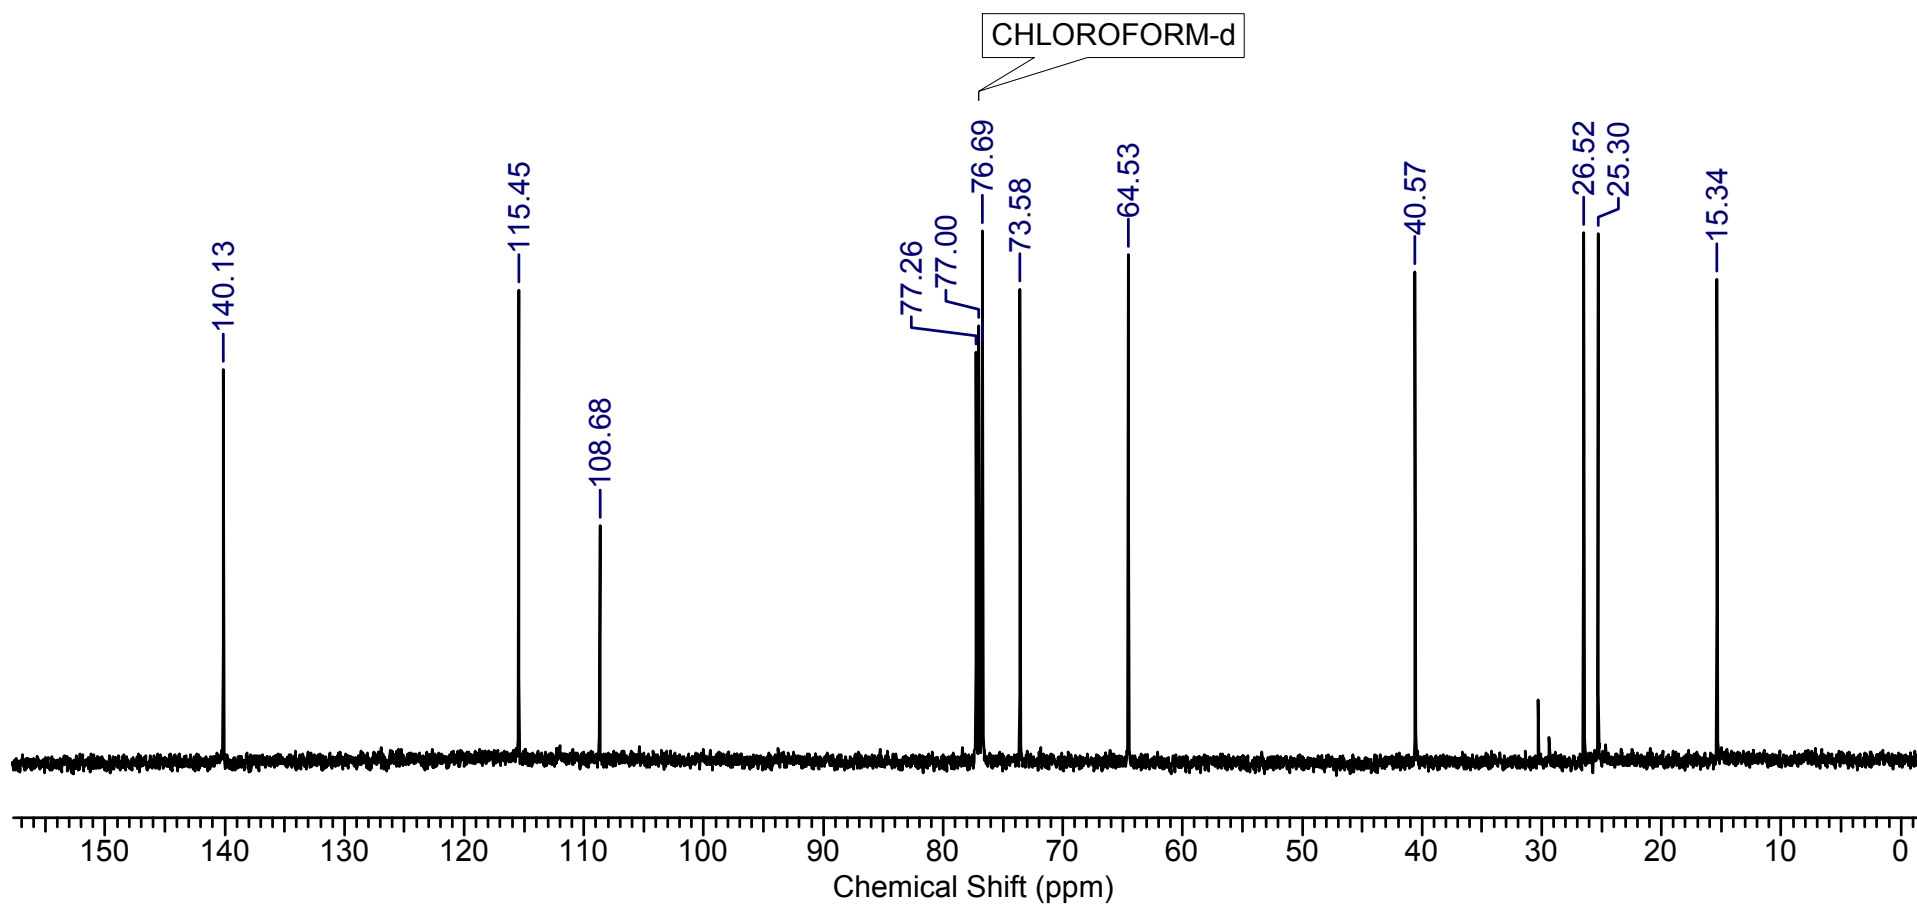

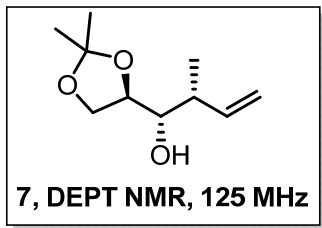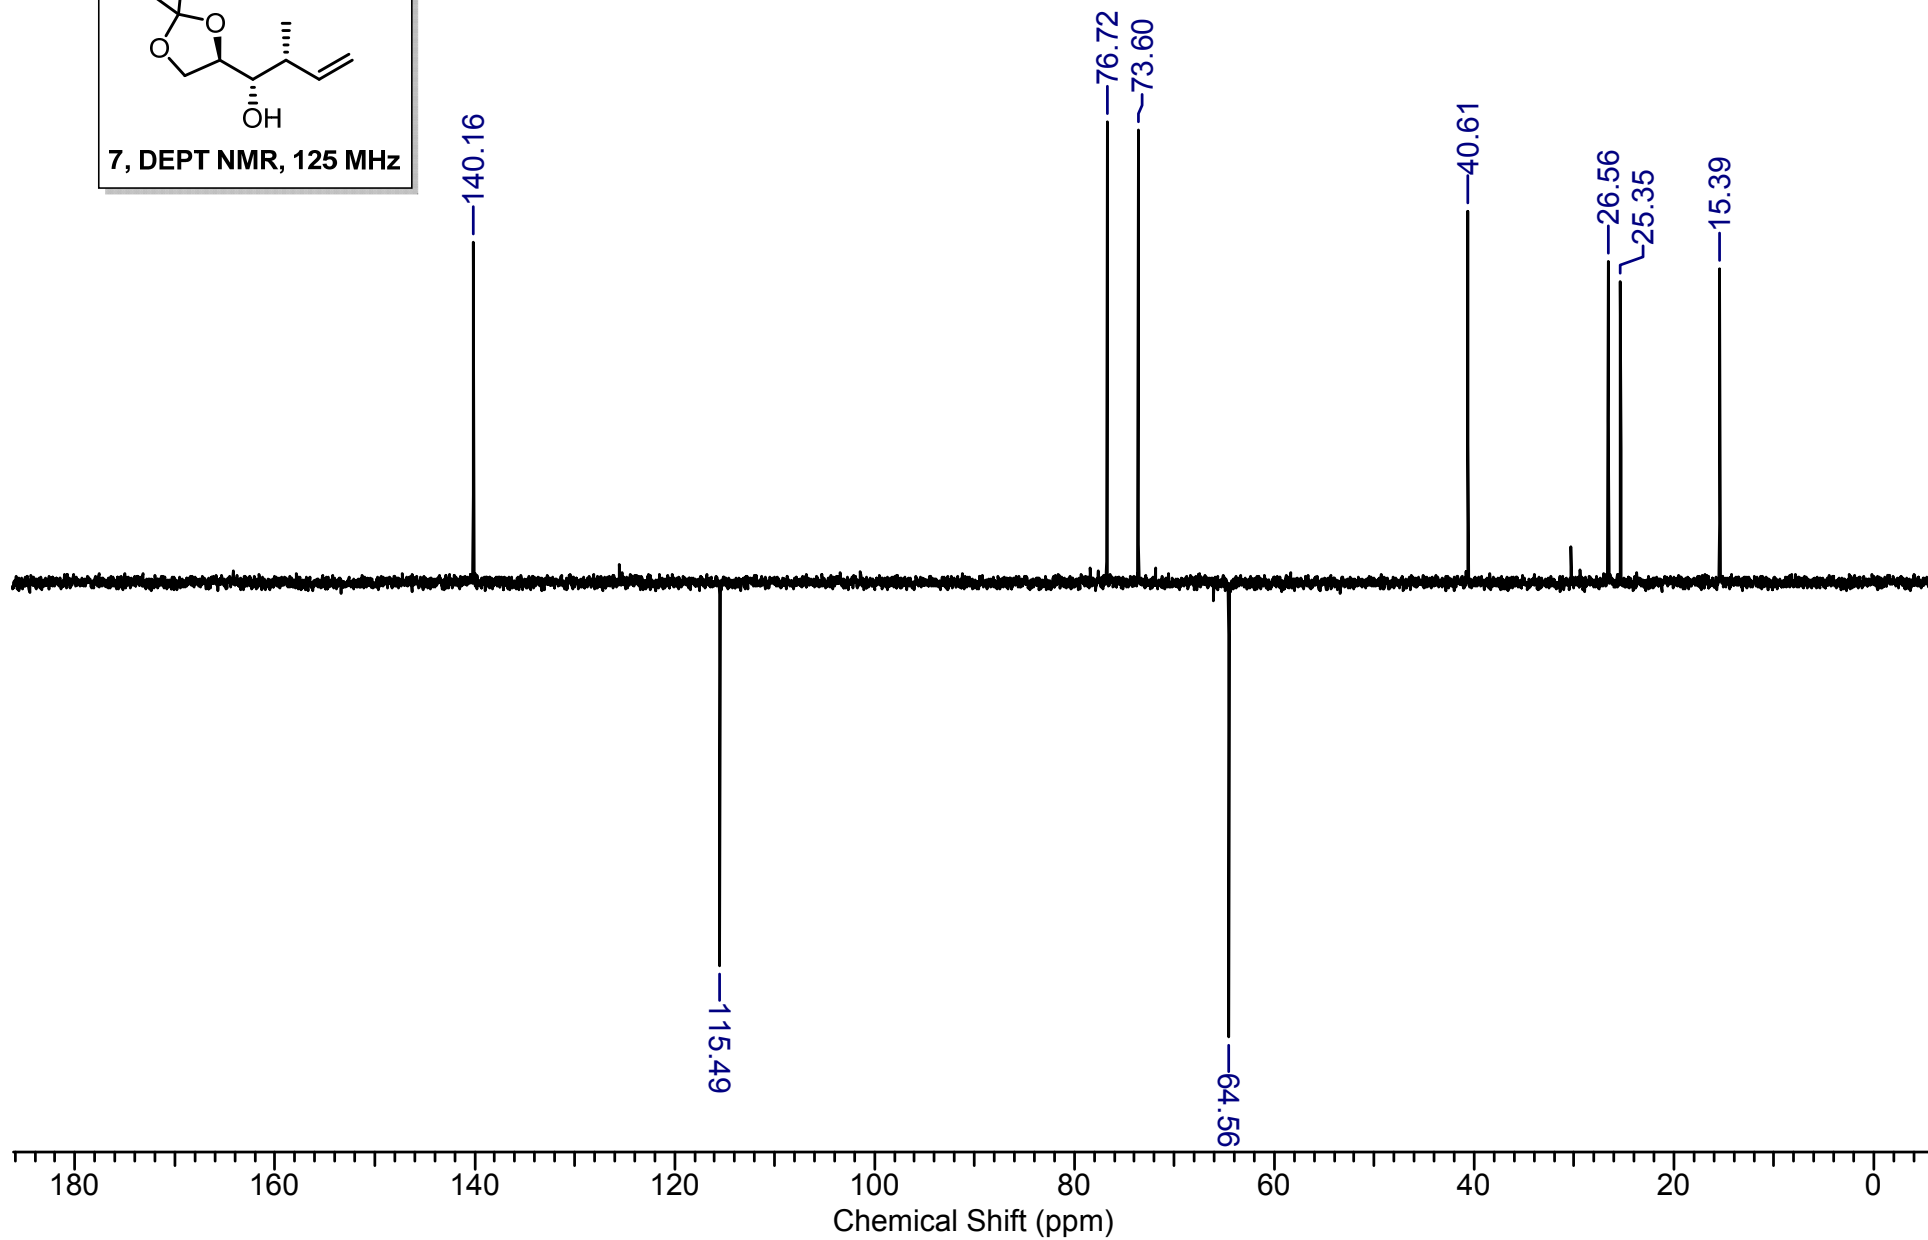

SS-51 #284 RT: 1.54 AV: 1 NL: 7.23E5  
T: FTMS + p ESI Full ms [100.0000-1500.0000]

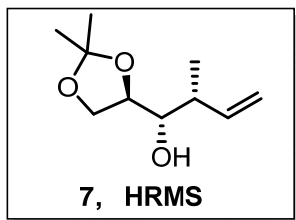

187.1327  
R=81507  
 $C_{10}H_{19}O_3 = 187.1329$   
-0.9648 ppm

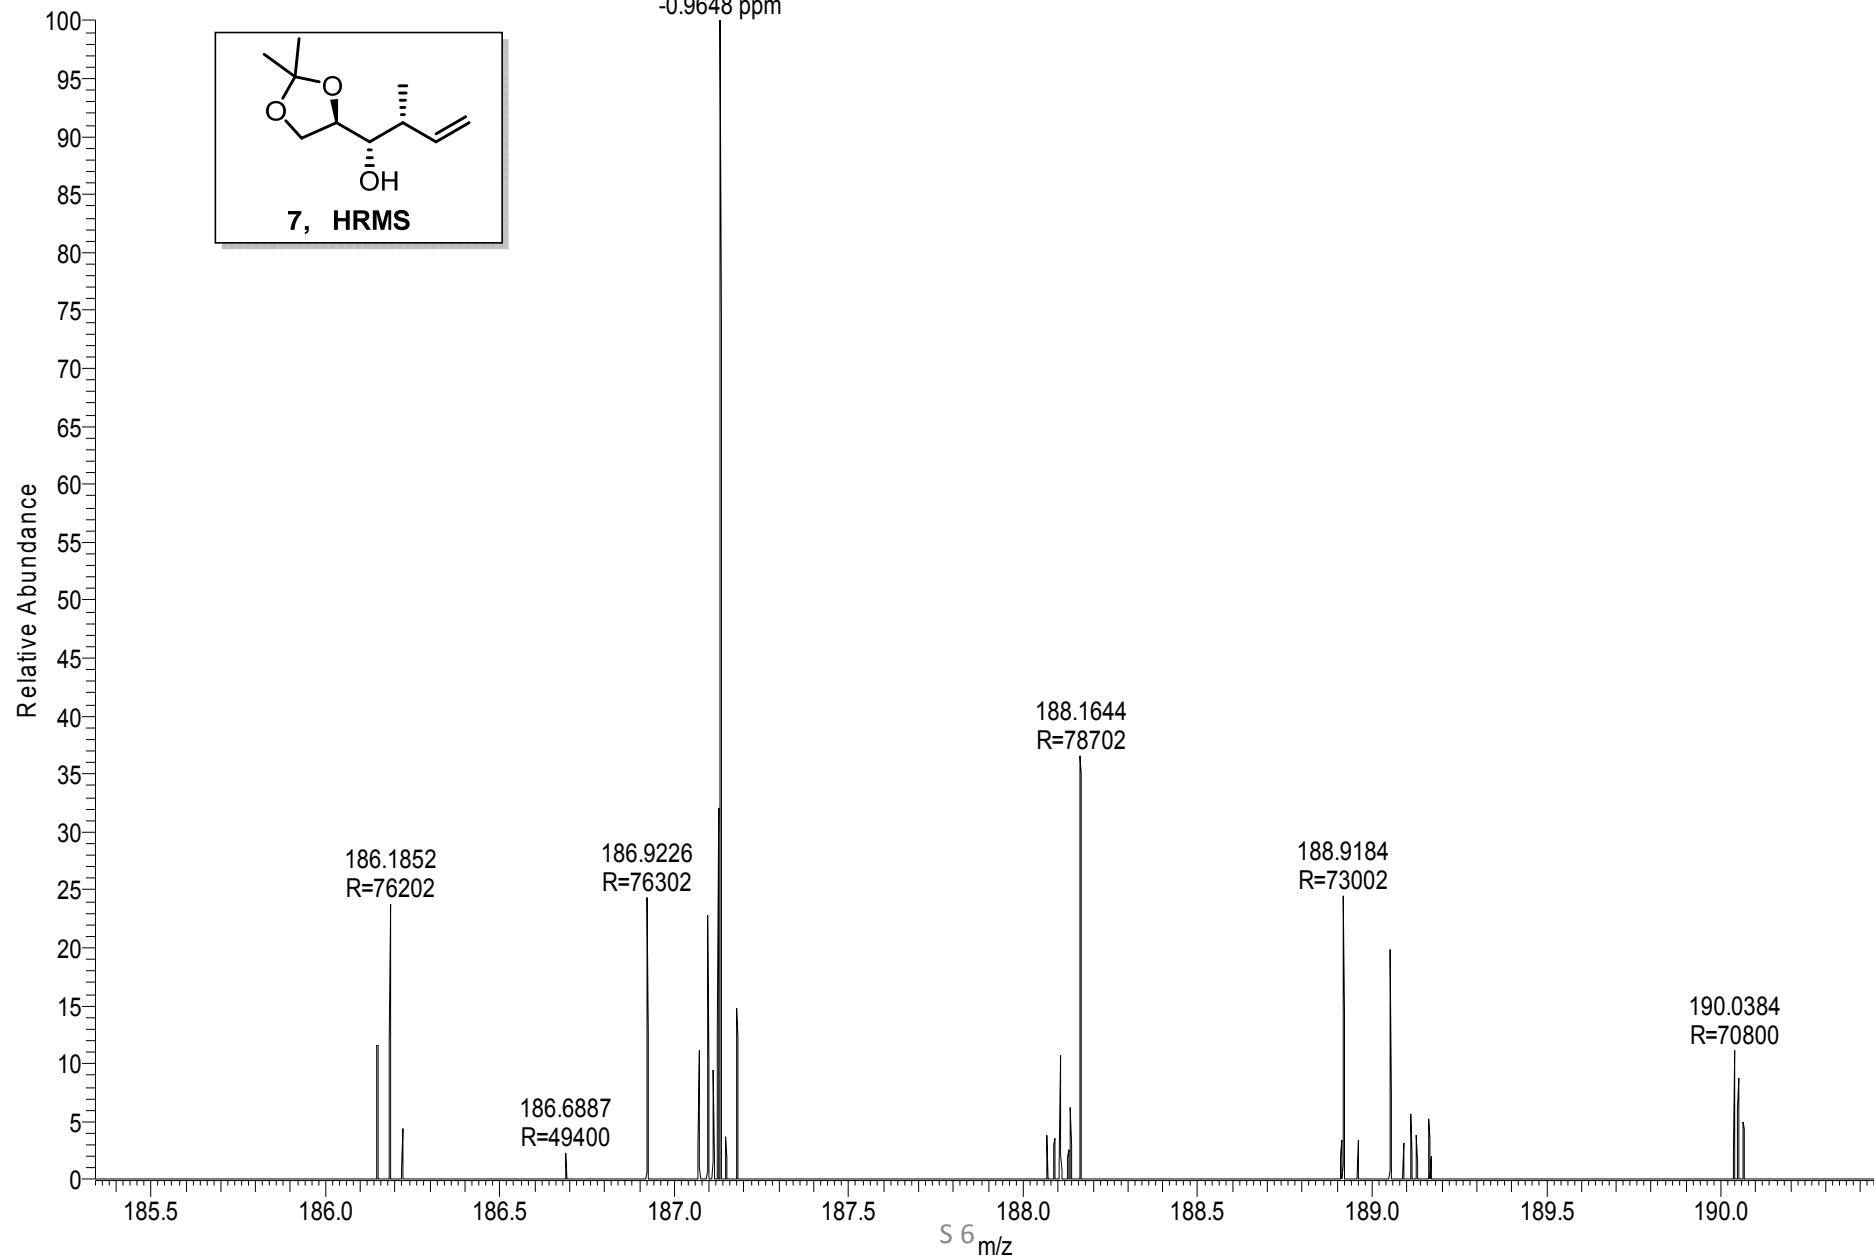

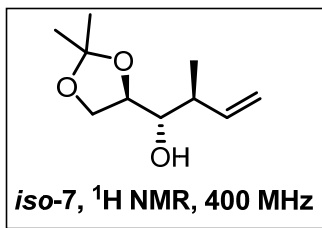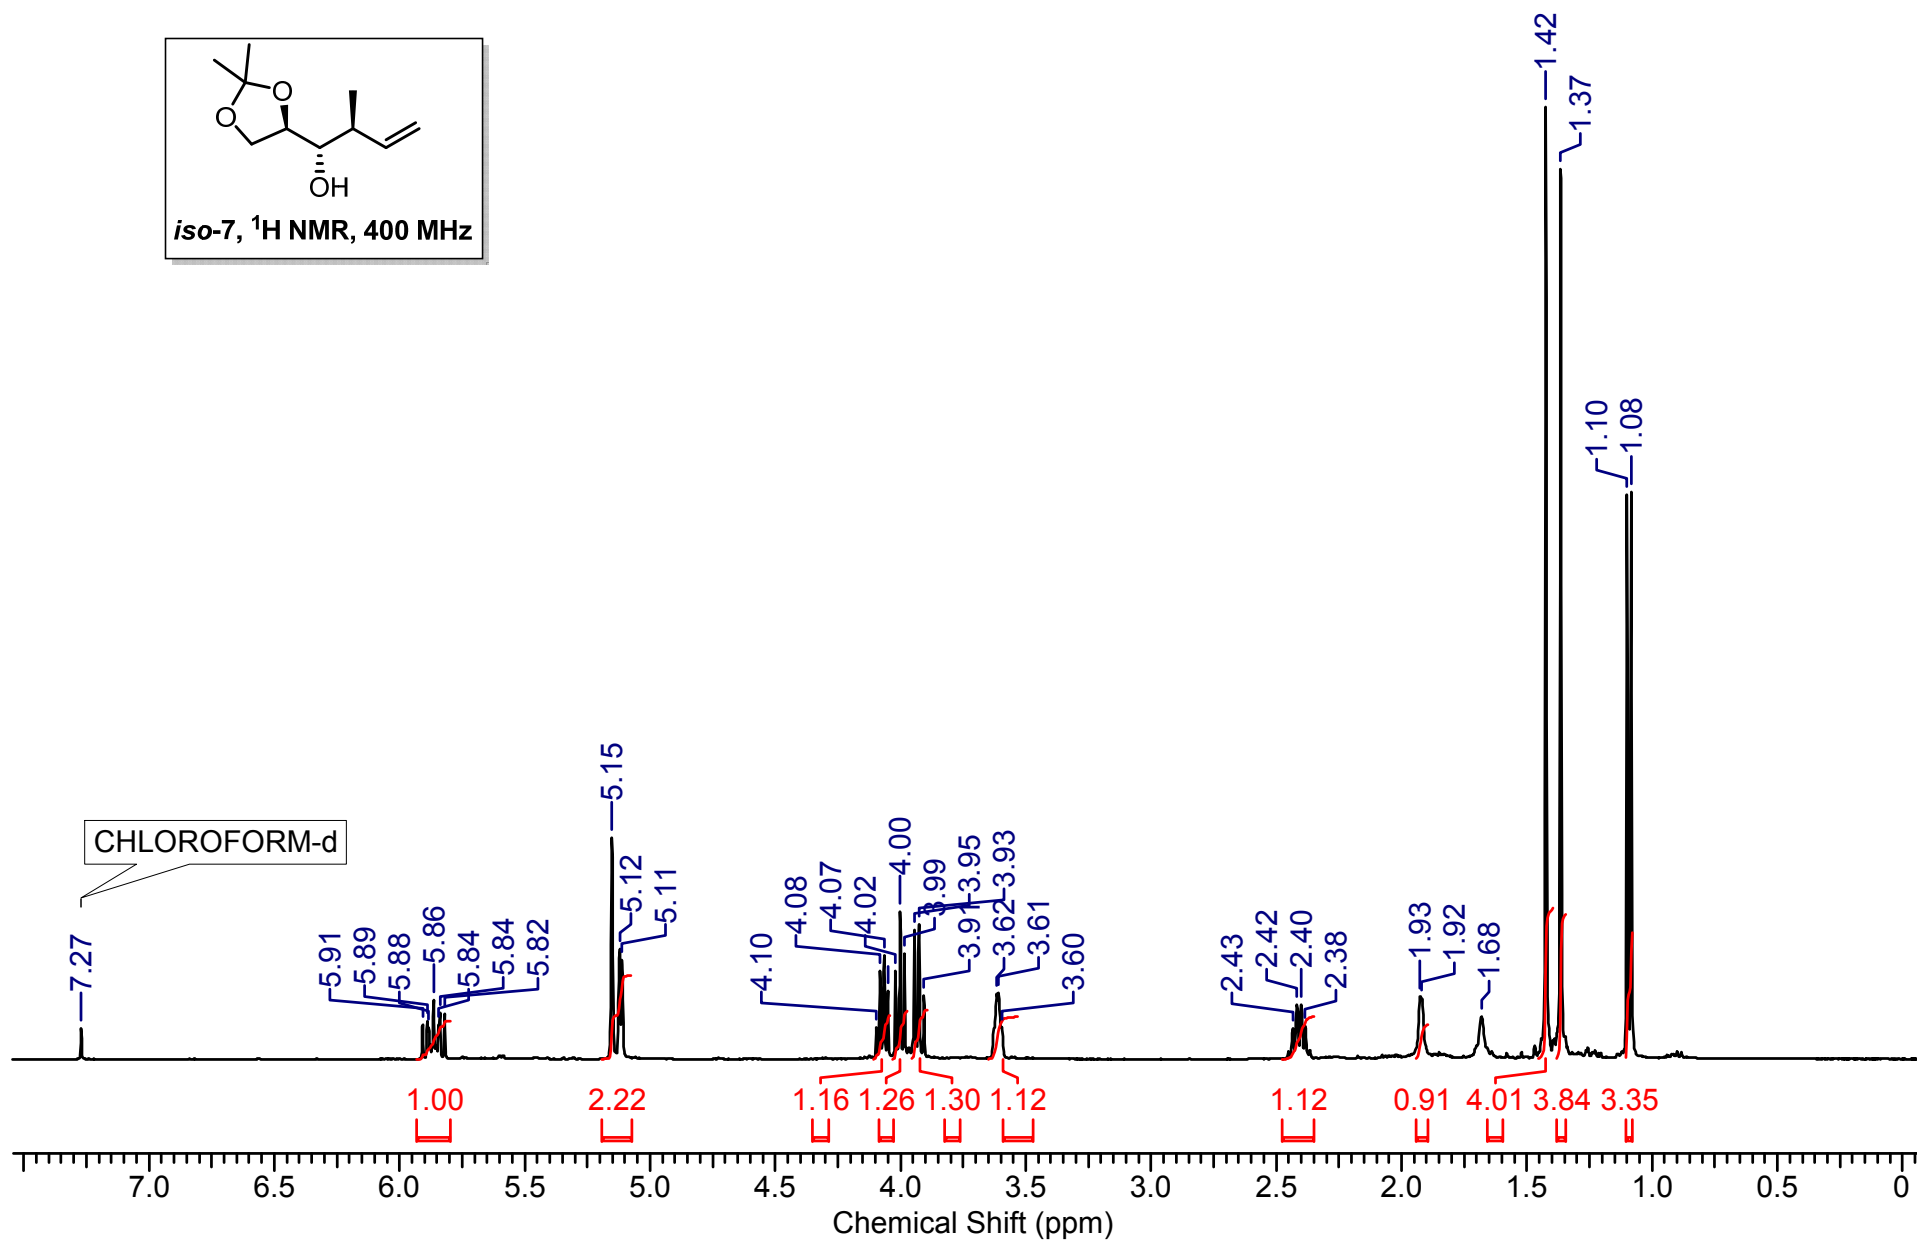

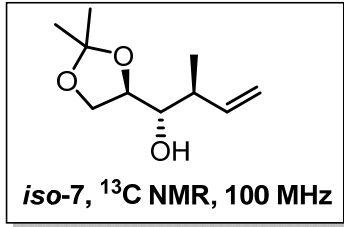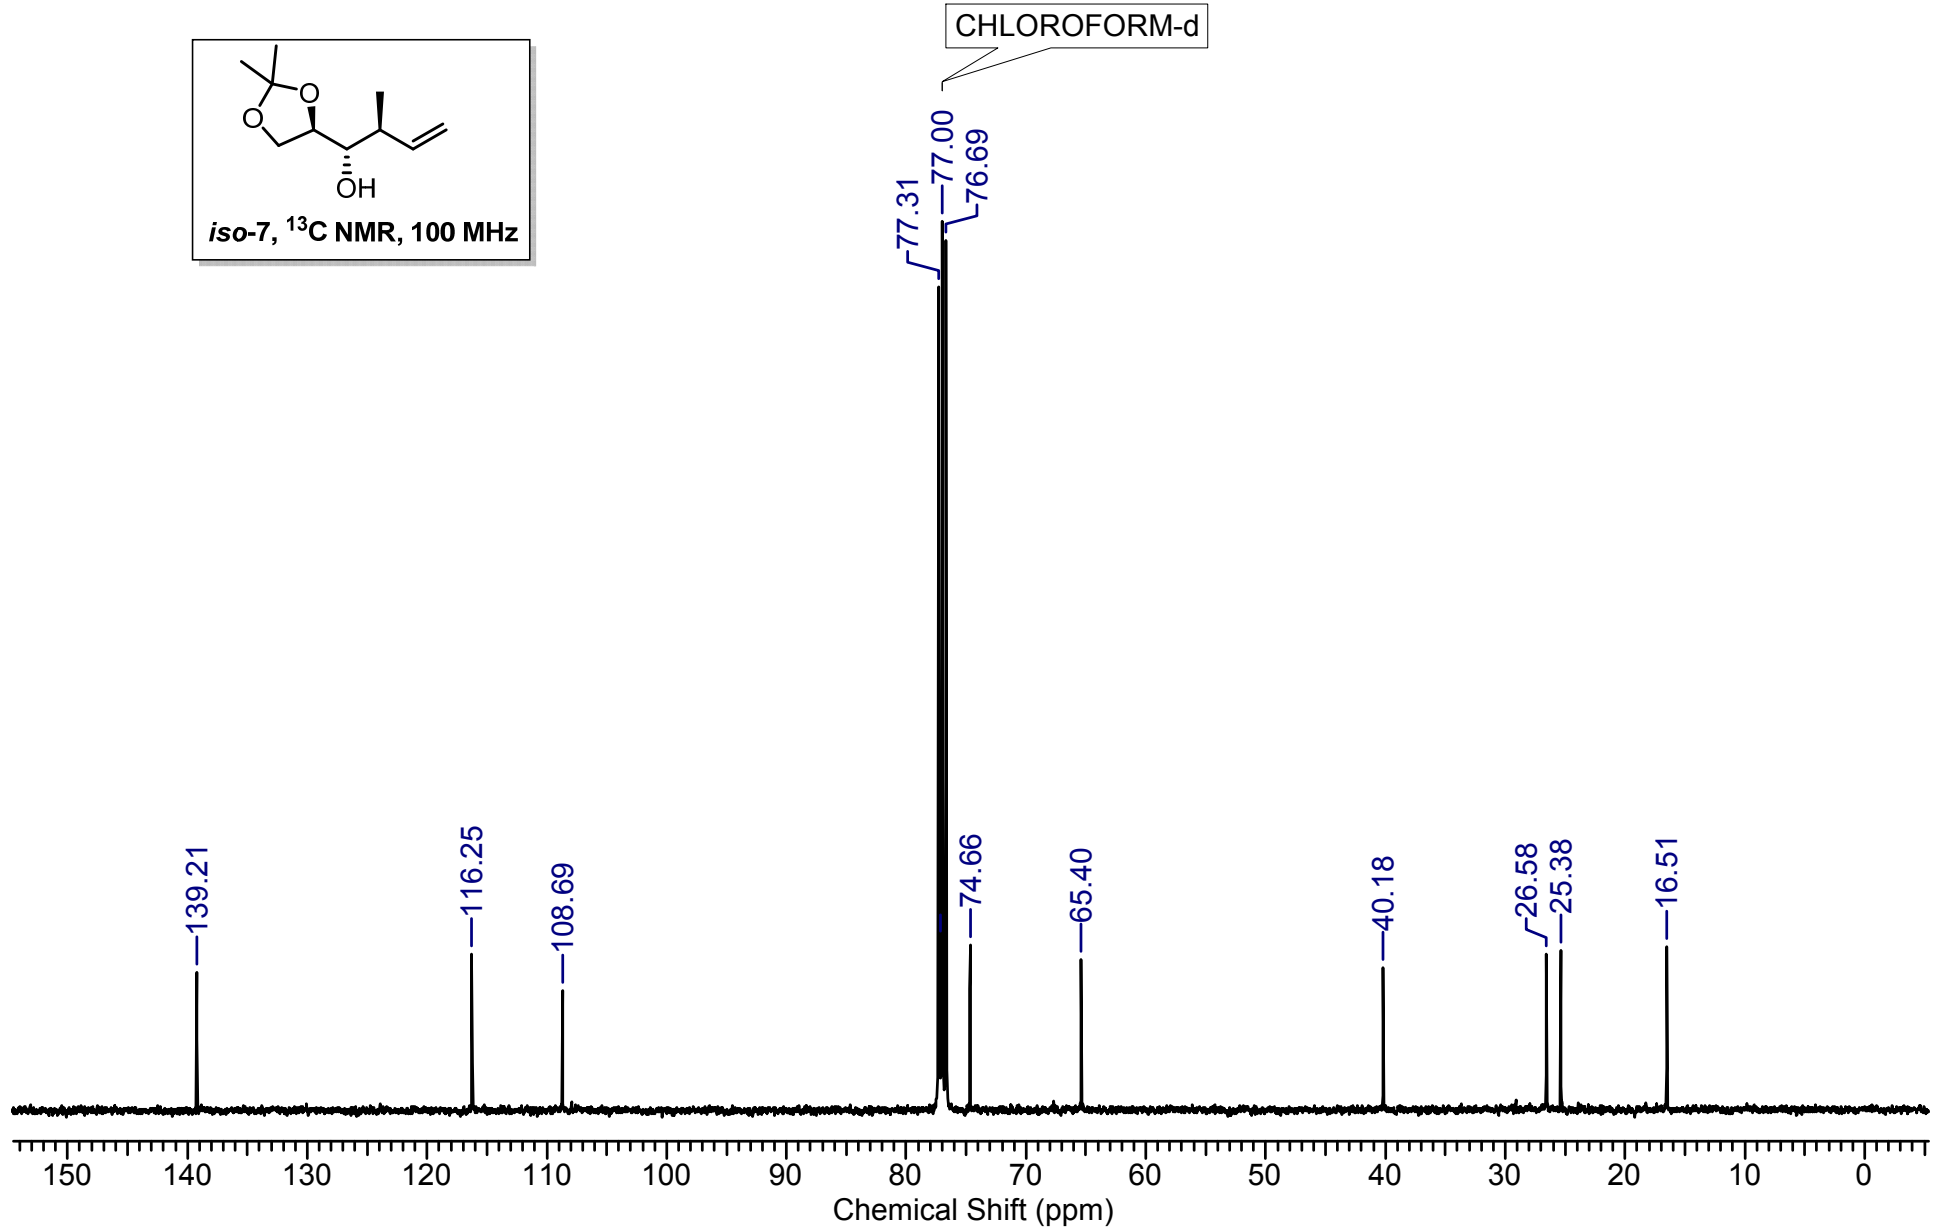



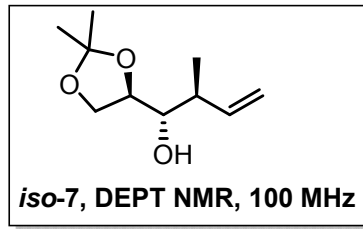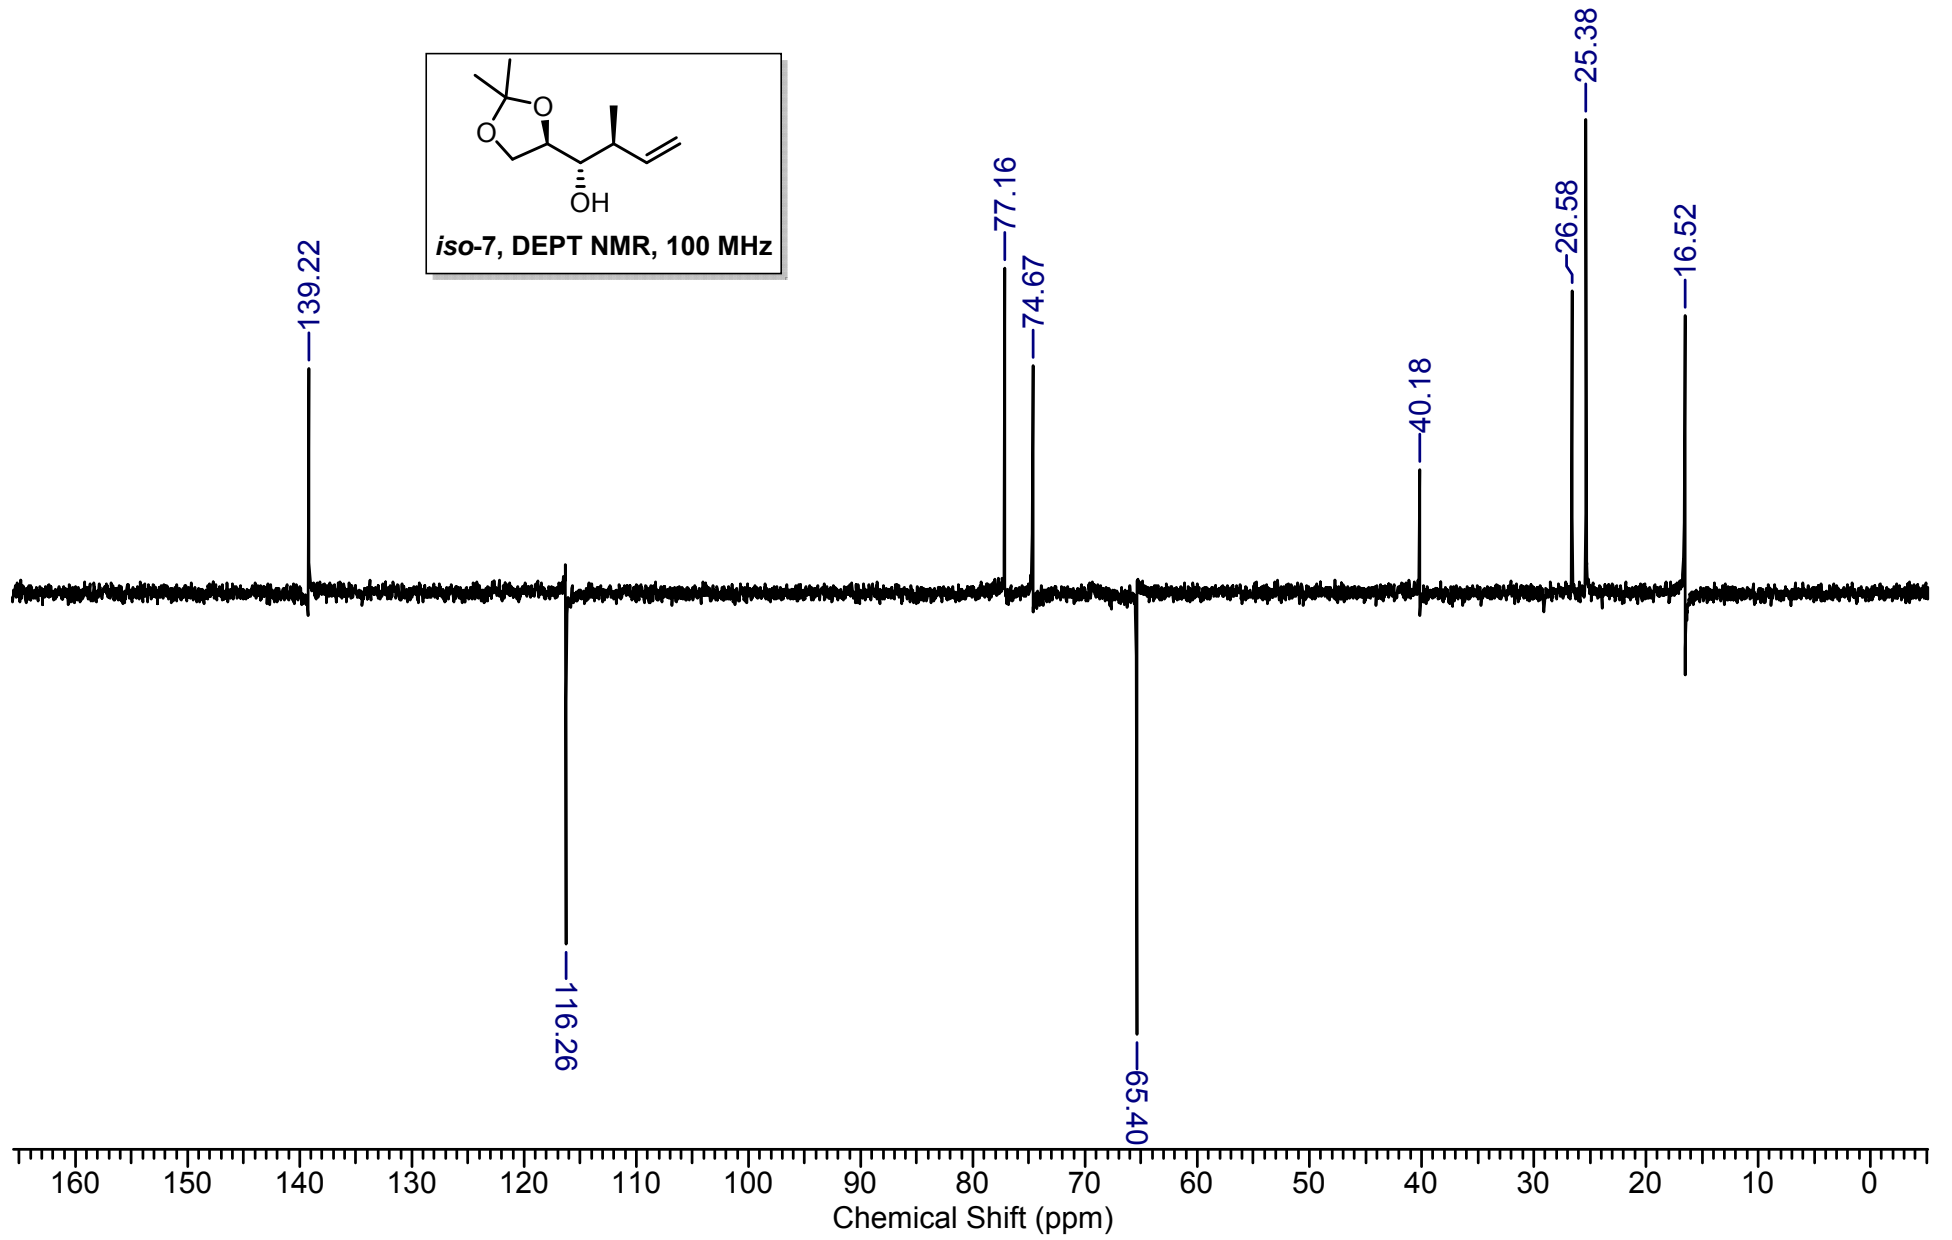

SS\_1#221 RT: 1.51 AV: 1 NL: 1.14E7  
T: FTMS + p ESI Full ms [100.0000-1500.0000]

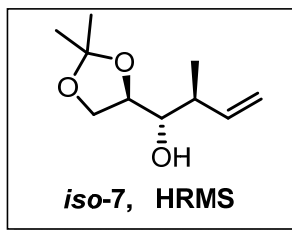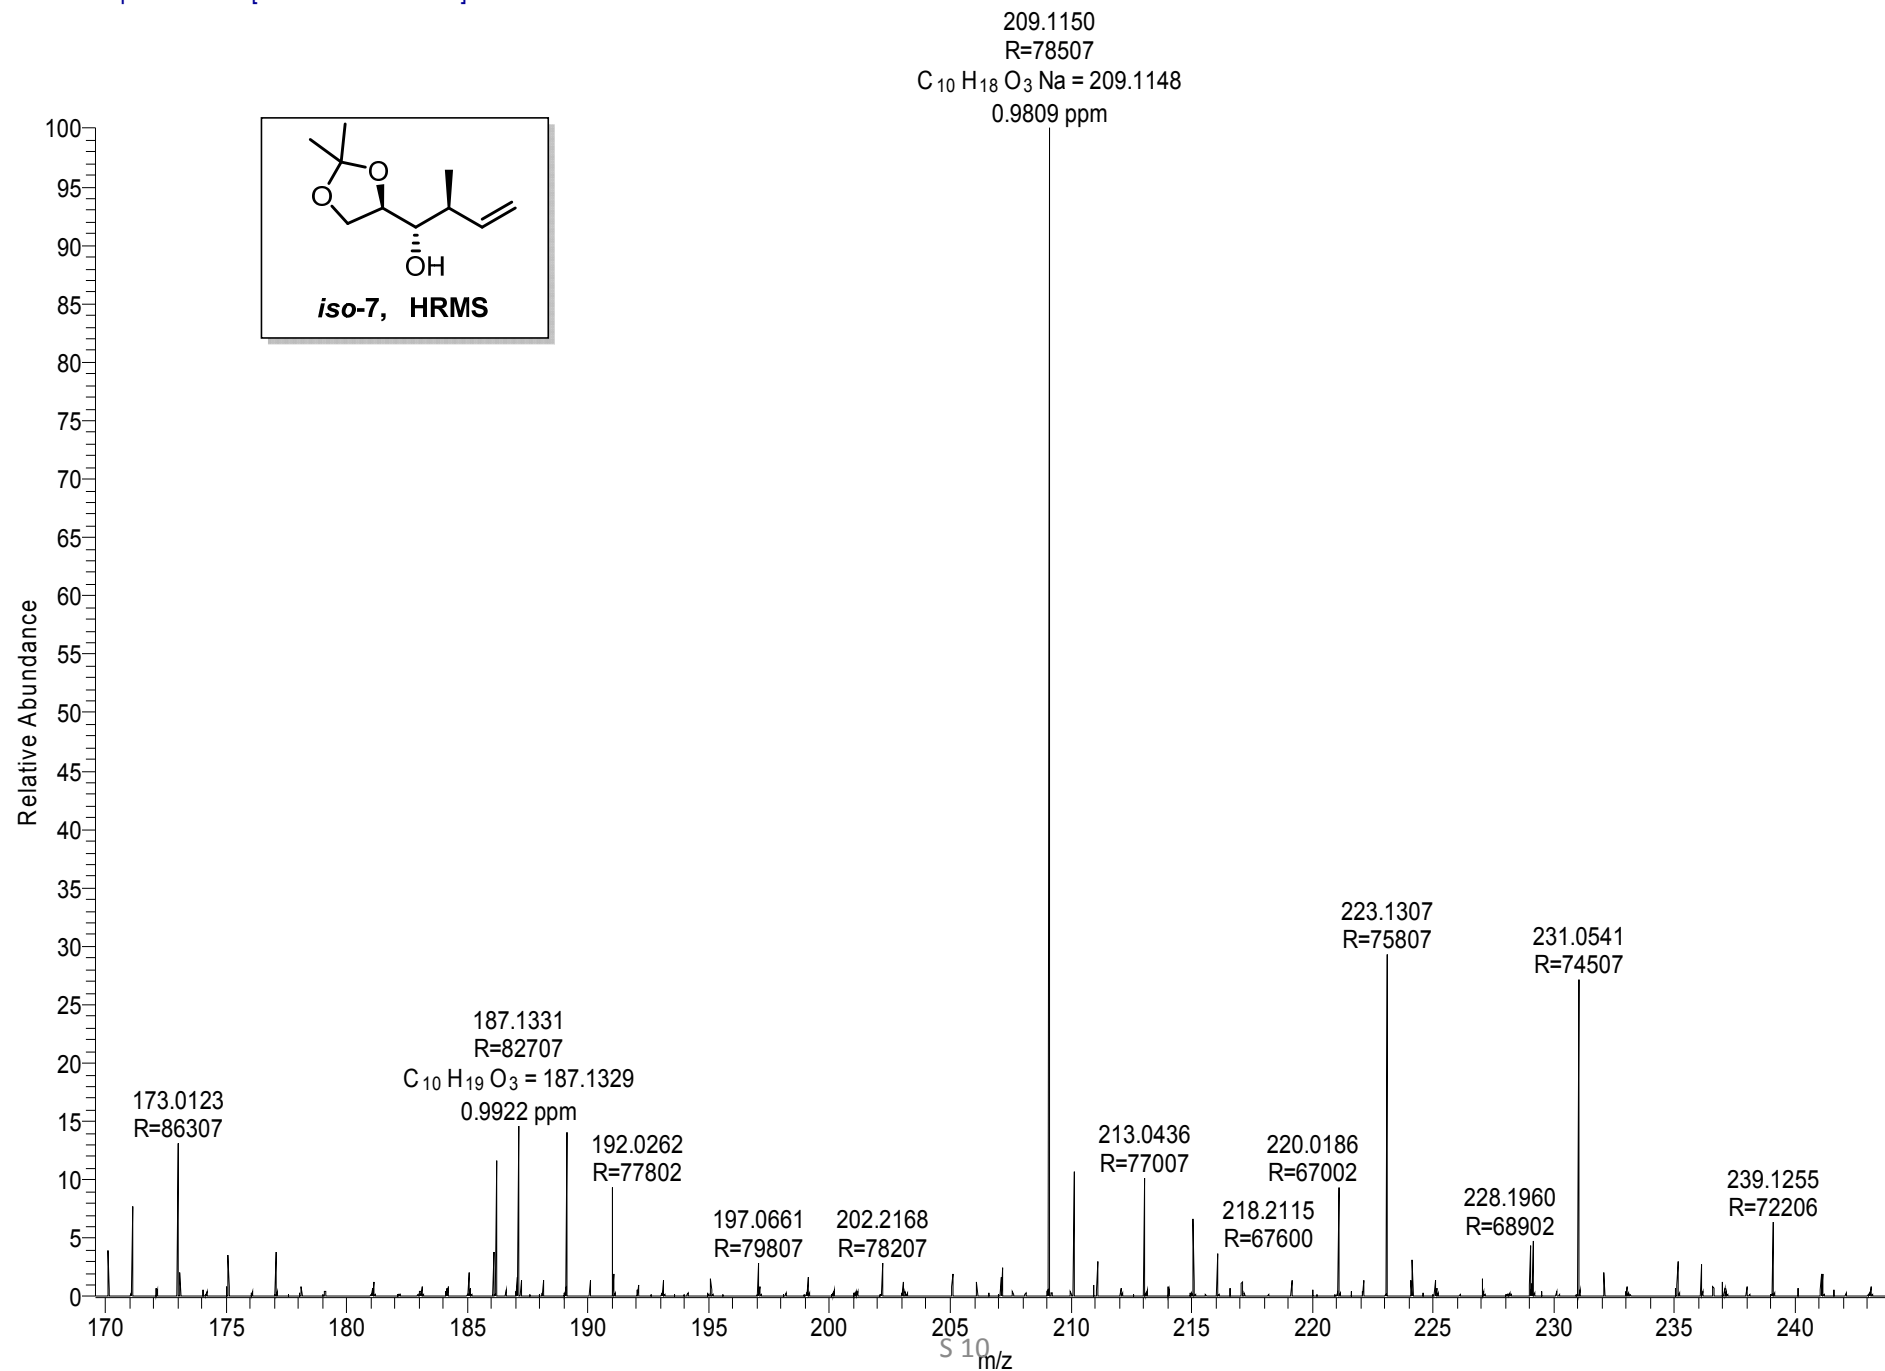

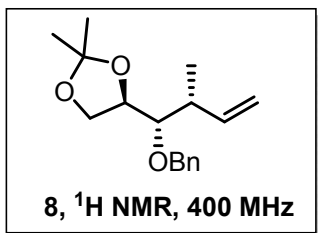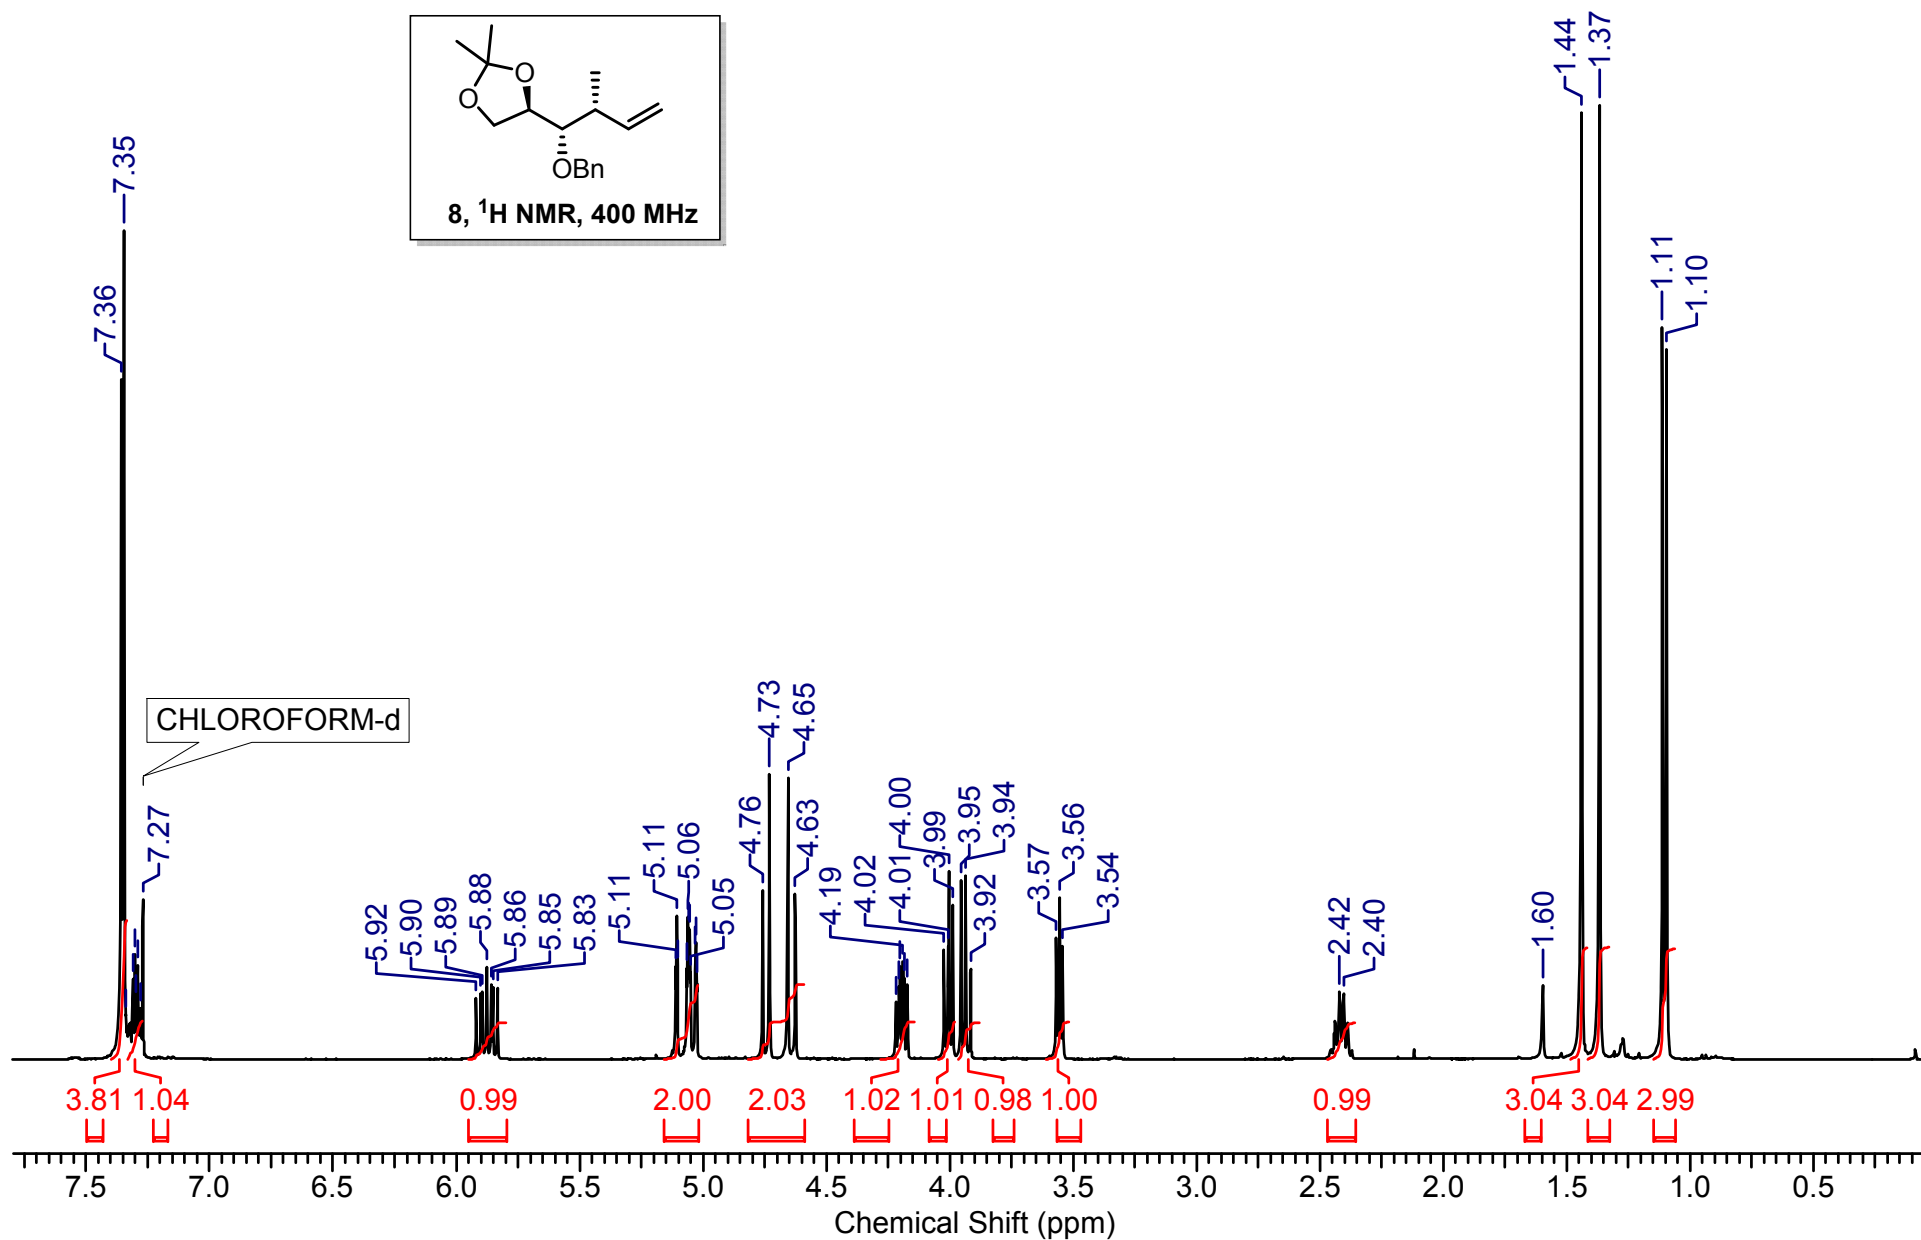

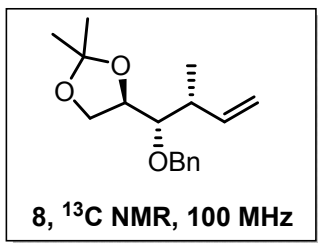

CHLOROFORM-d

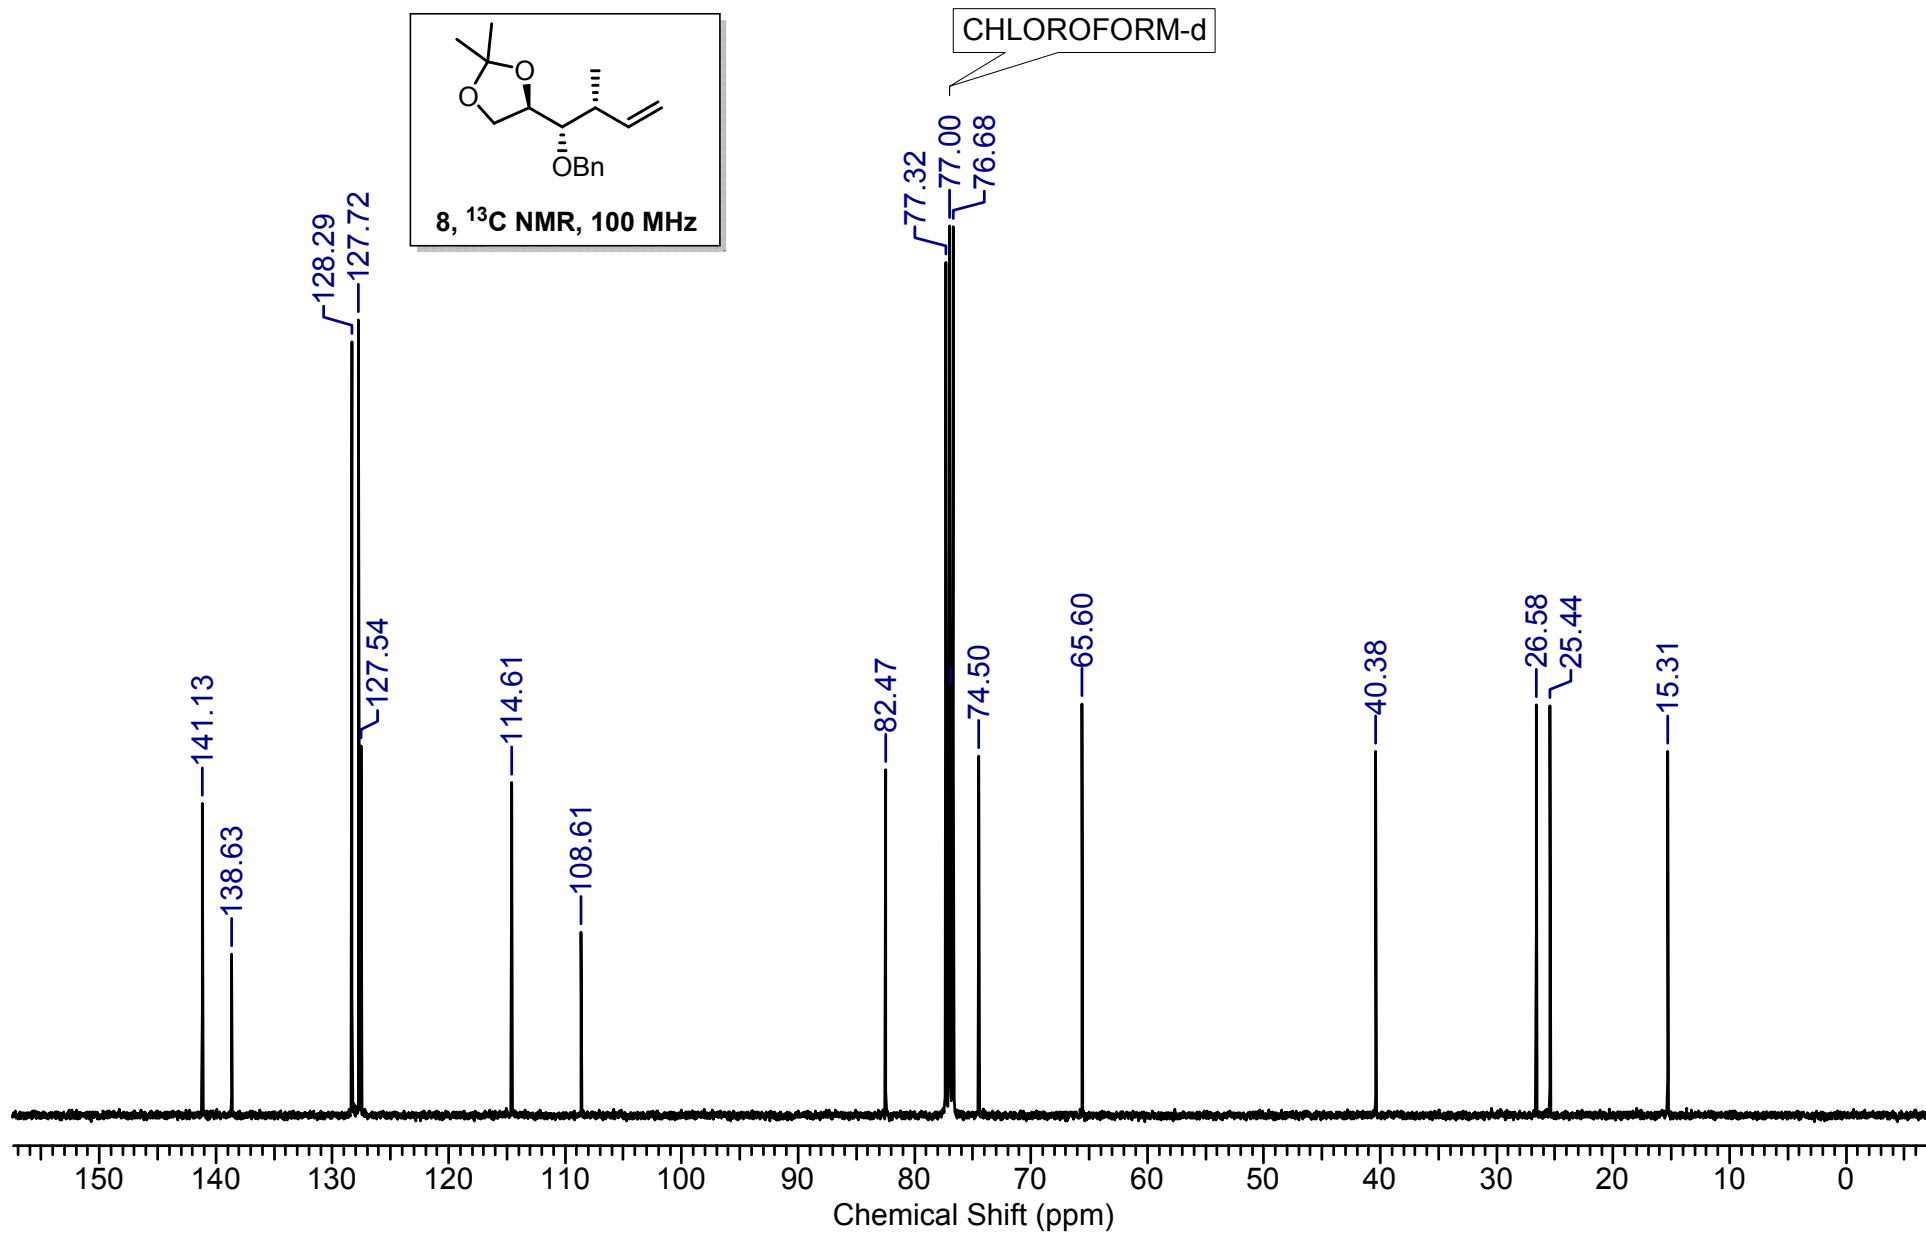

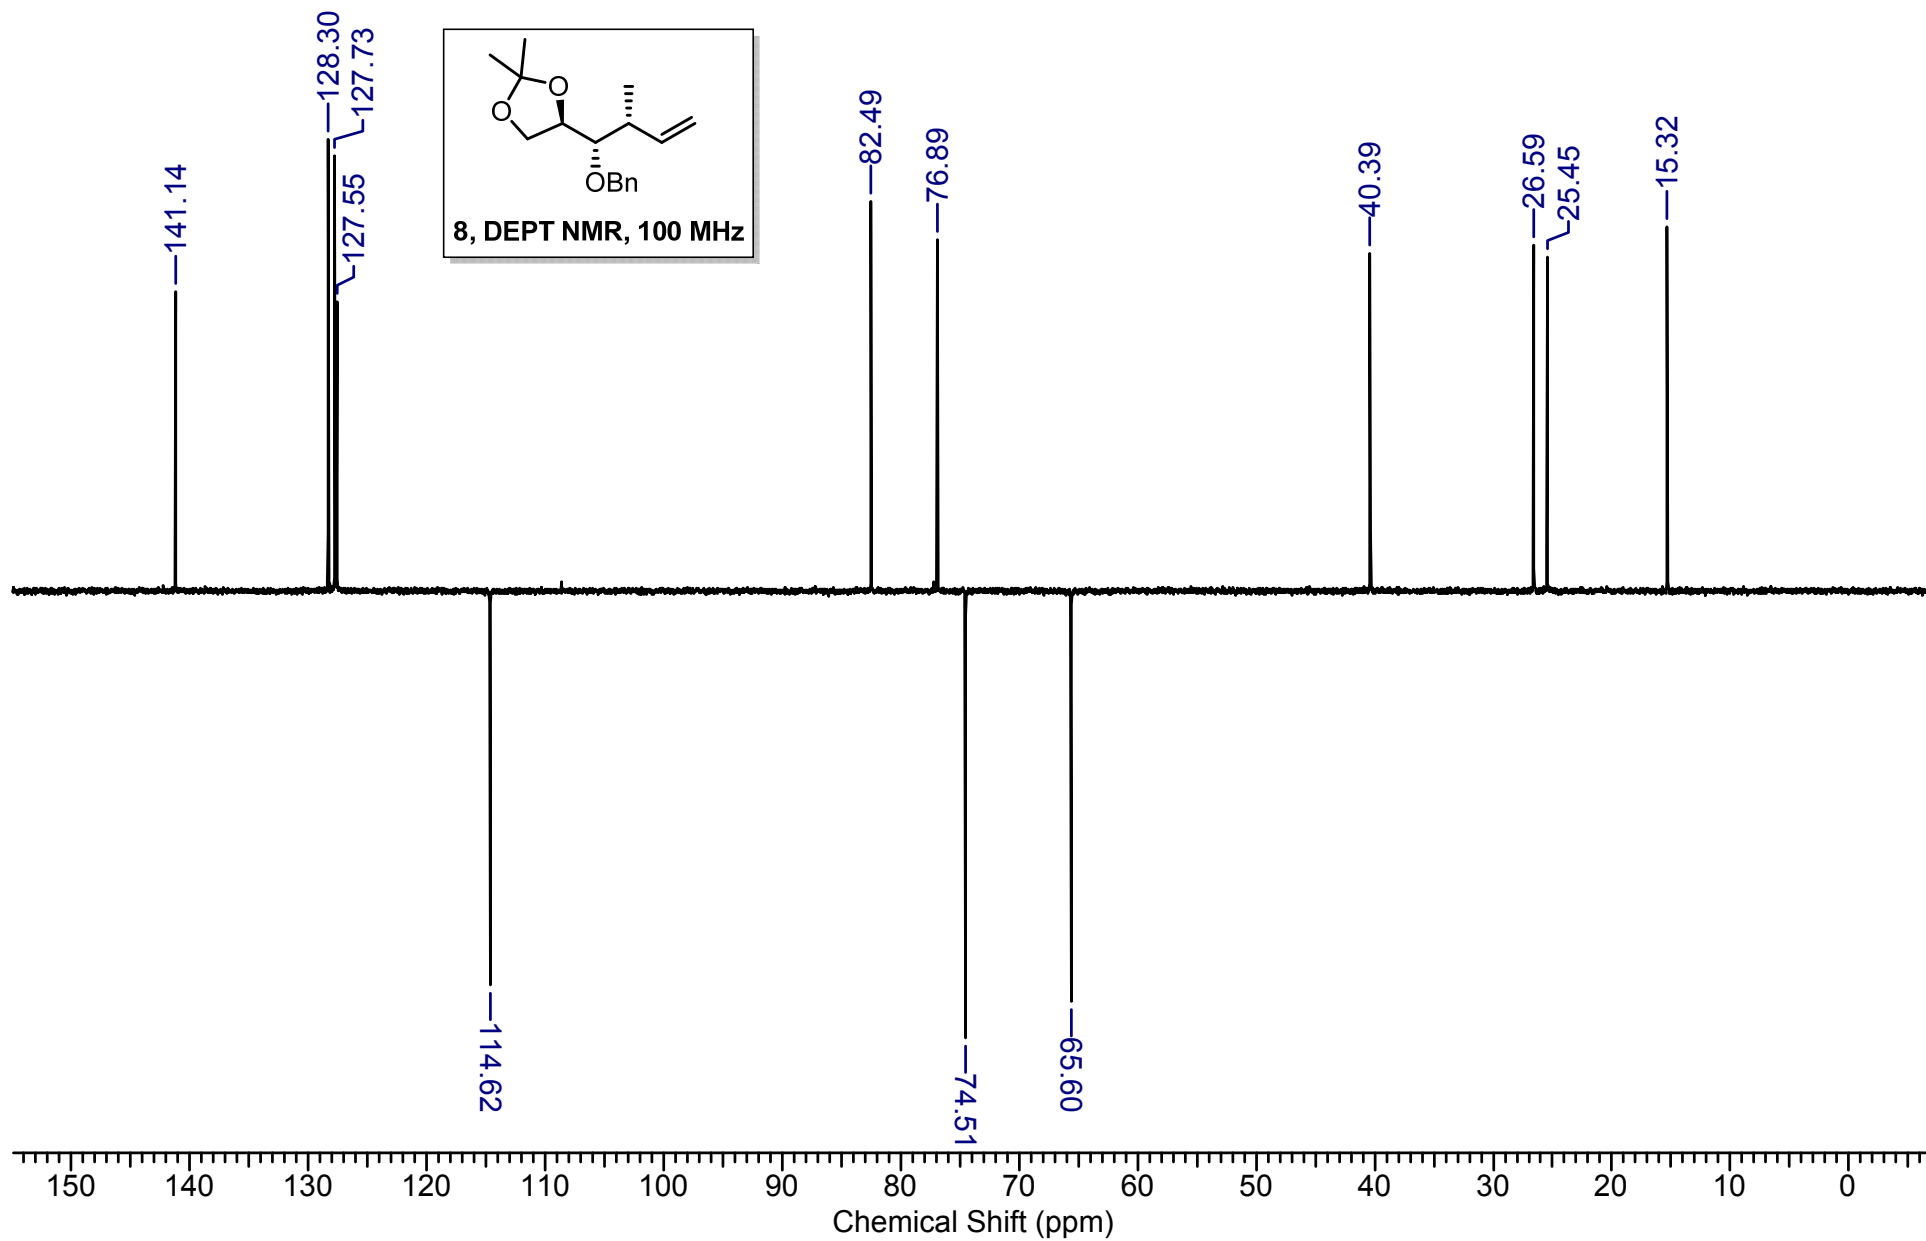

SS-1 #297 RT: 1.32 AV: 1 NL: 1.33E9  
T: FTMS + p ESI Full ms [133.4000-2000.0000]

299.1620  
R=65707  
C<sub>17</sub> H<sub>24</sub> O<sub>3</sub> Na = 299.1618  
0.7404 ppm

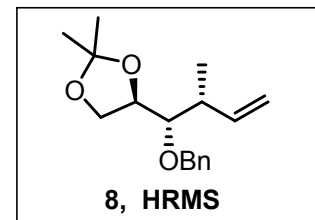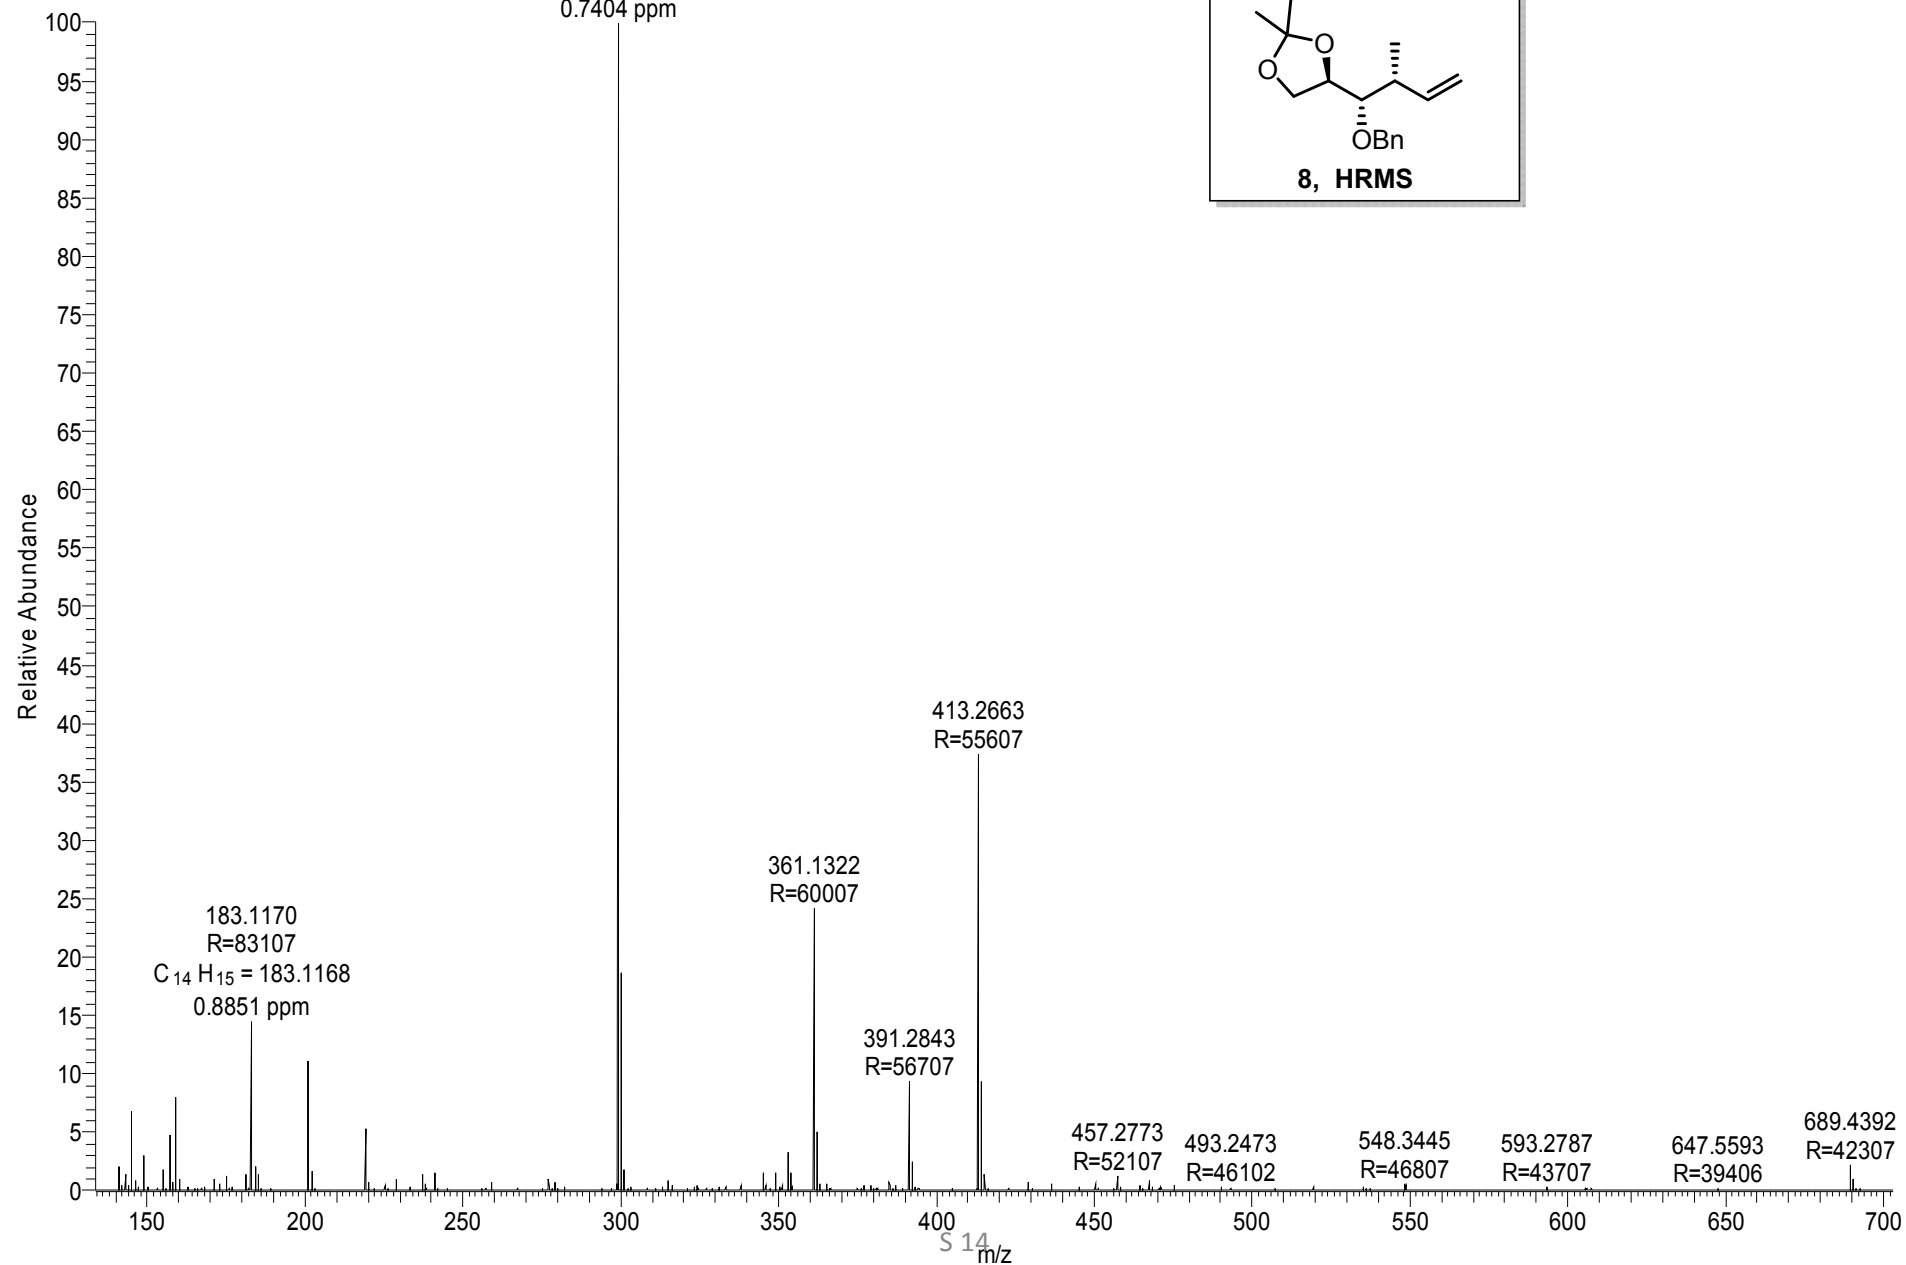

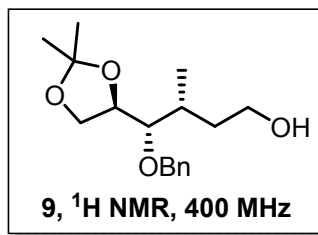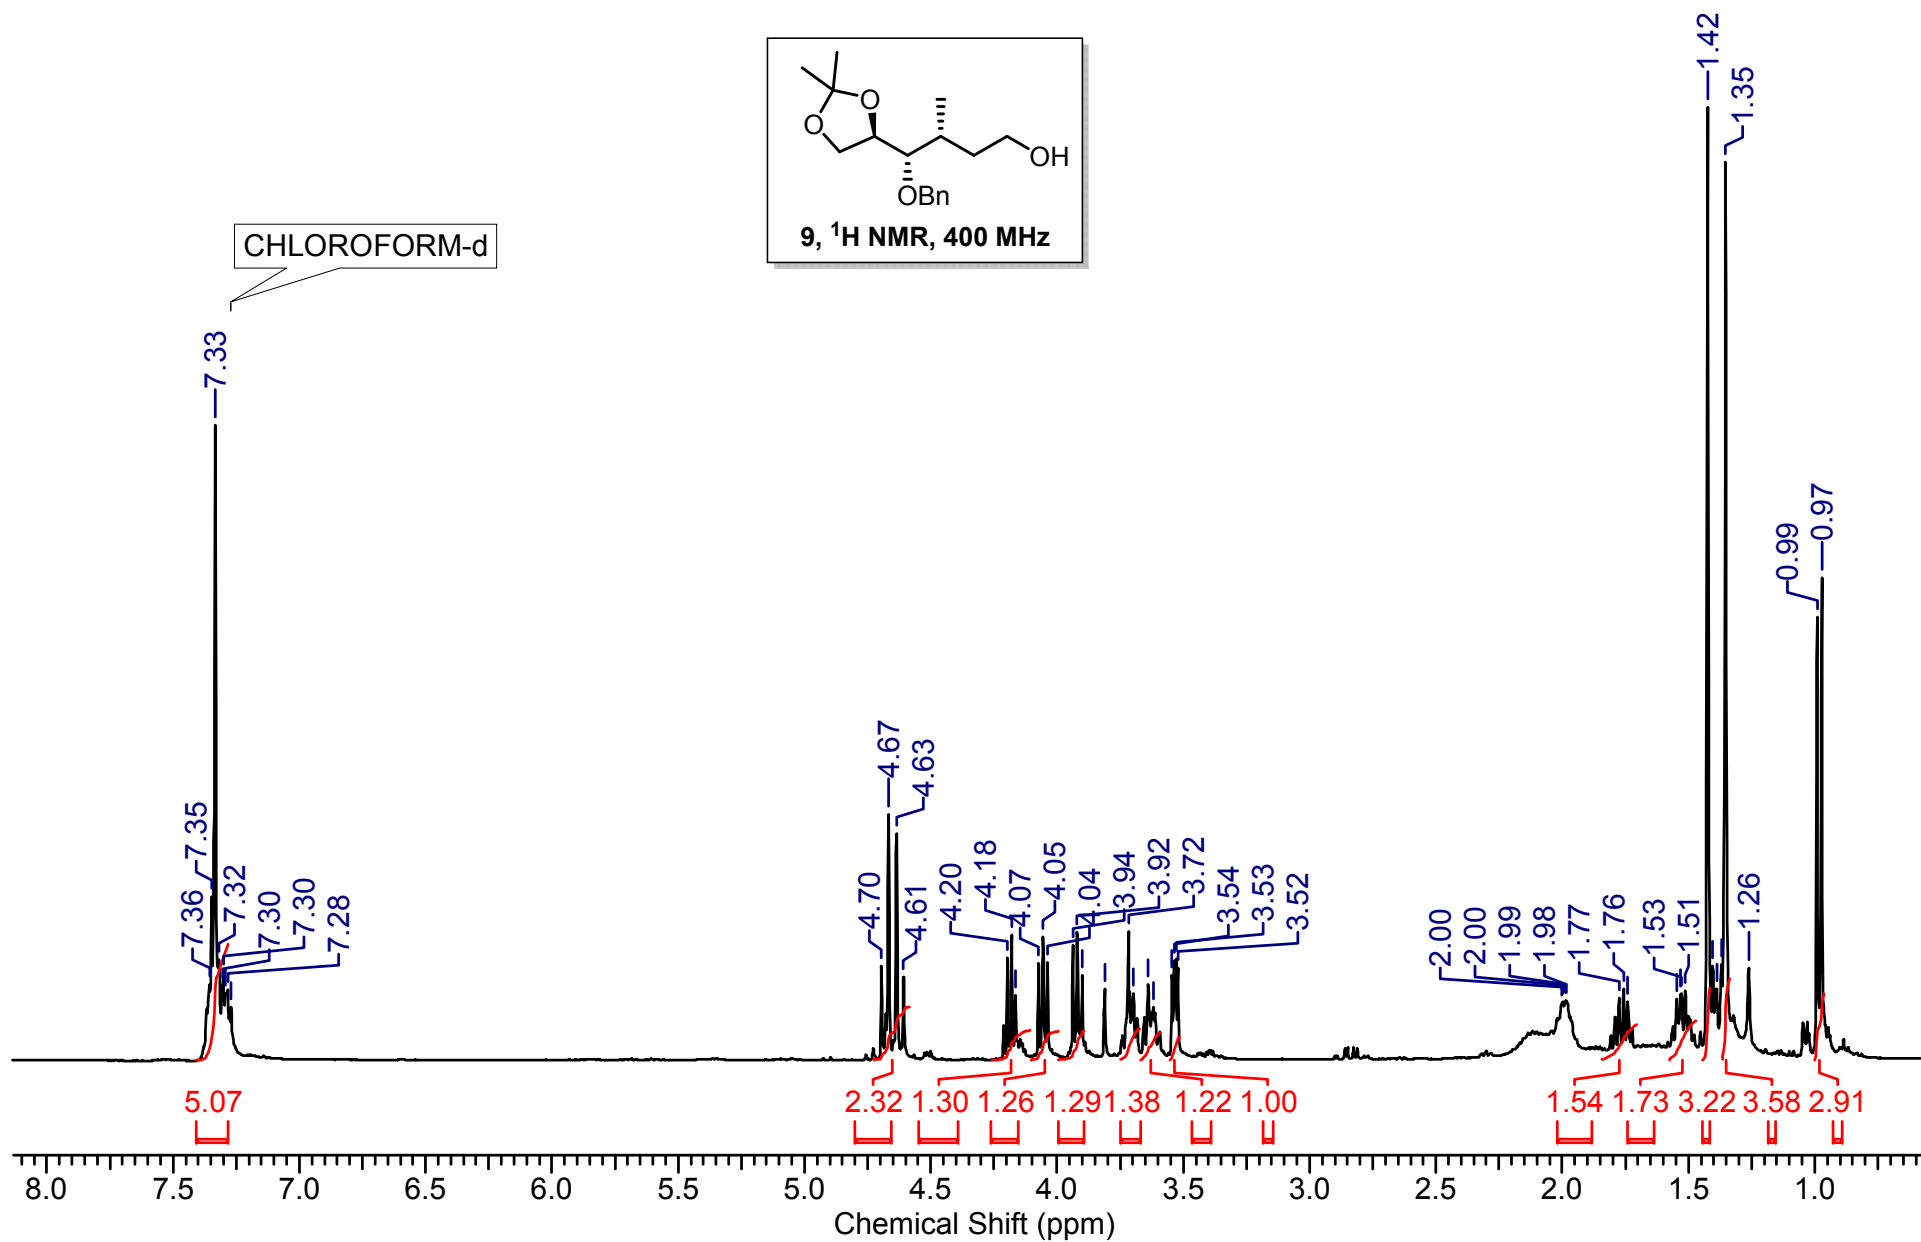

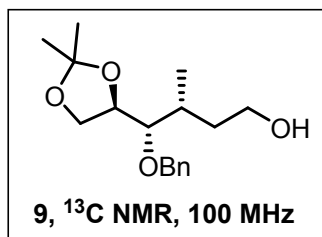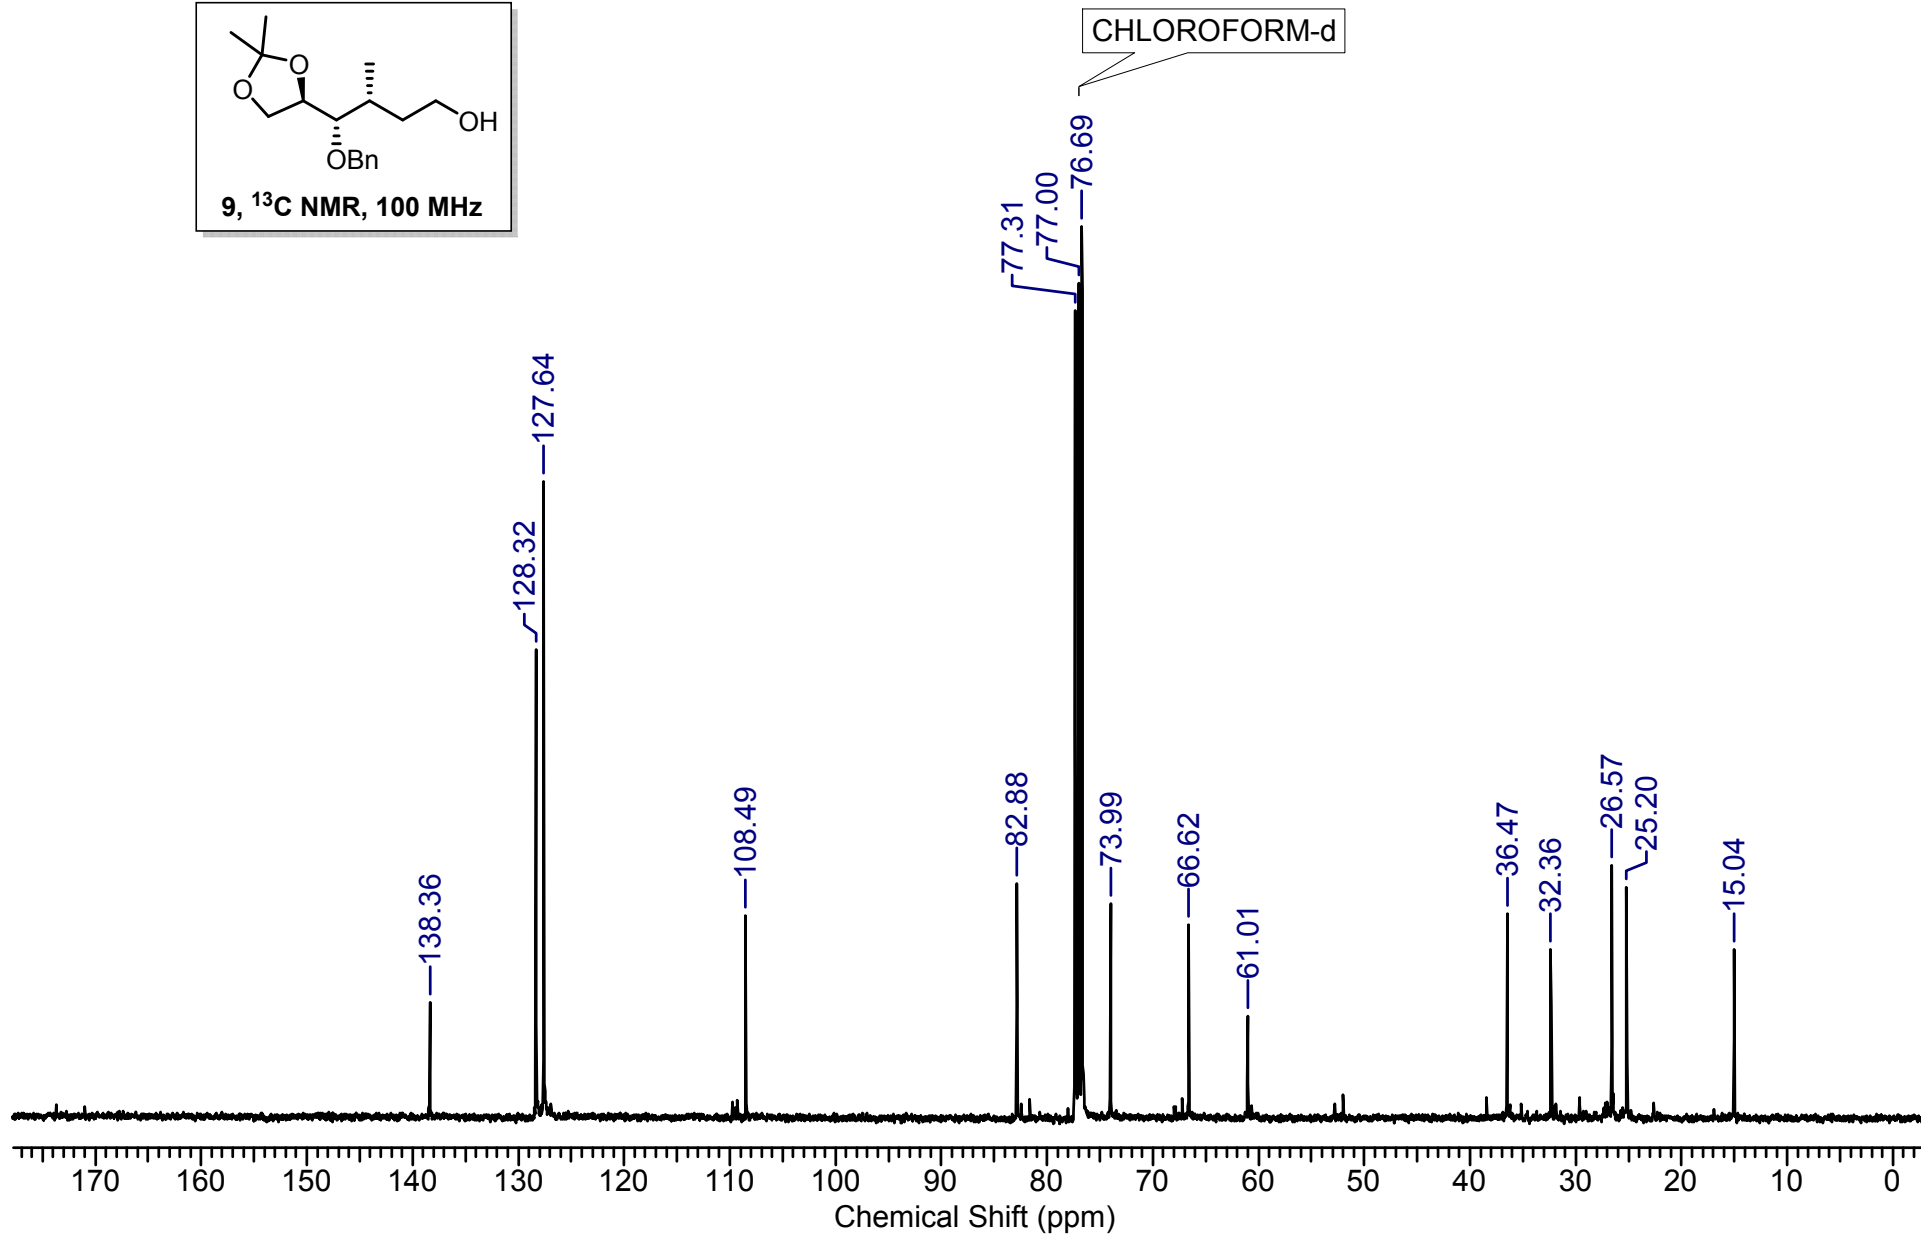



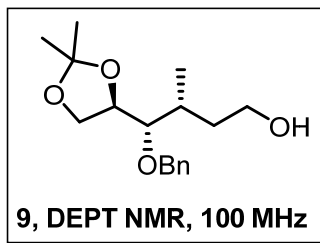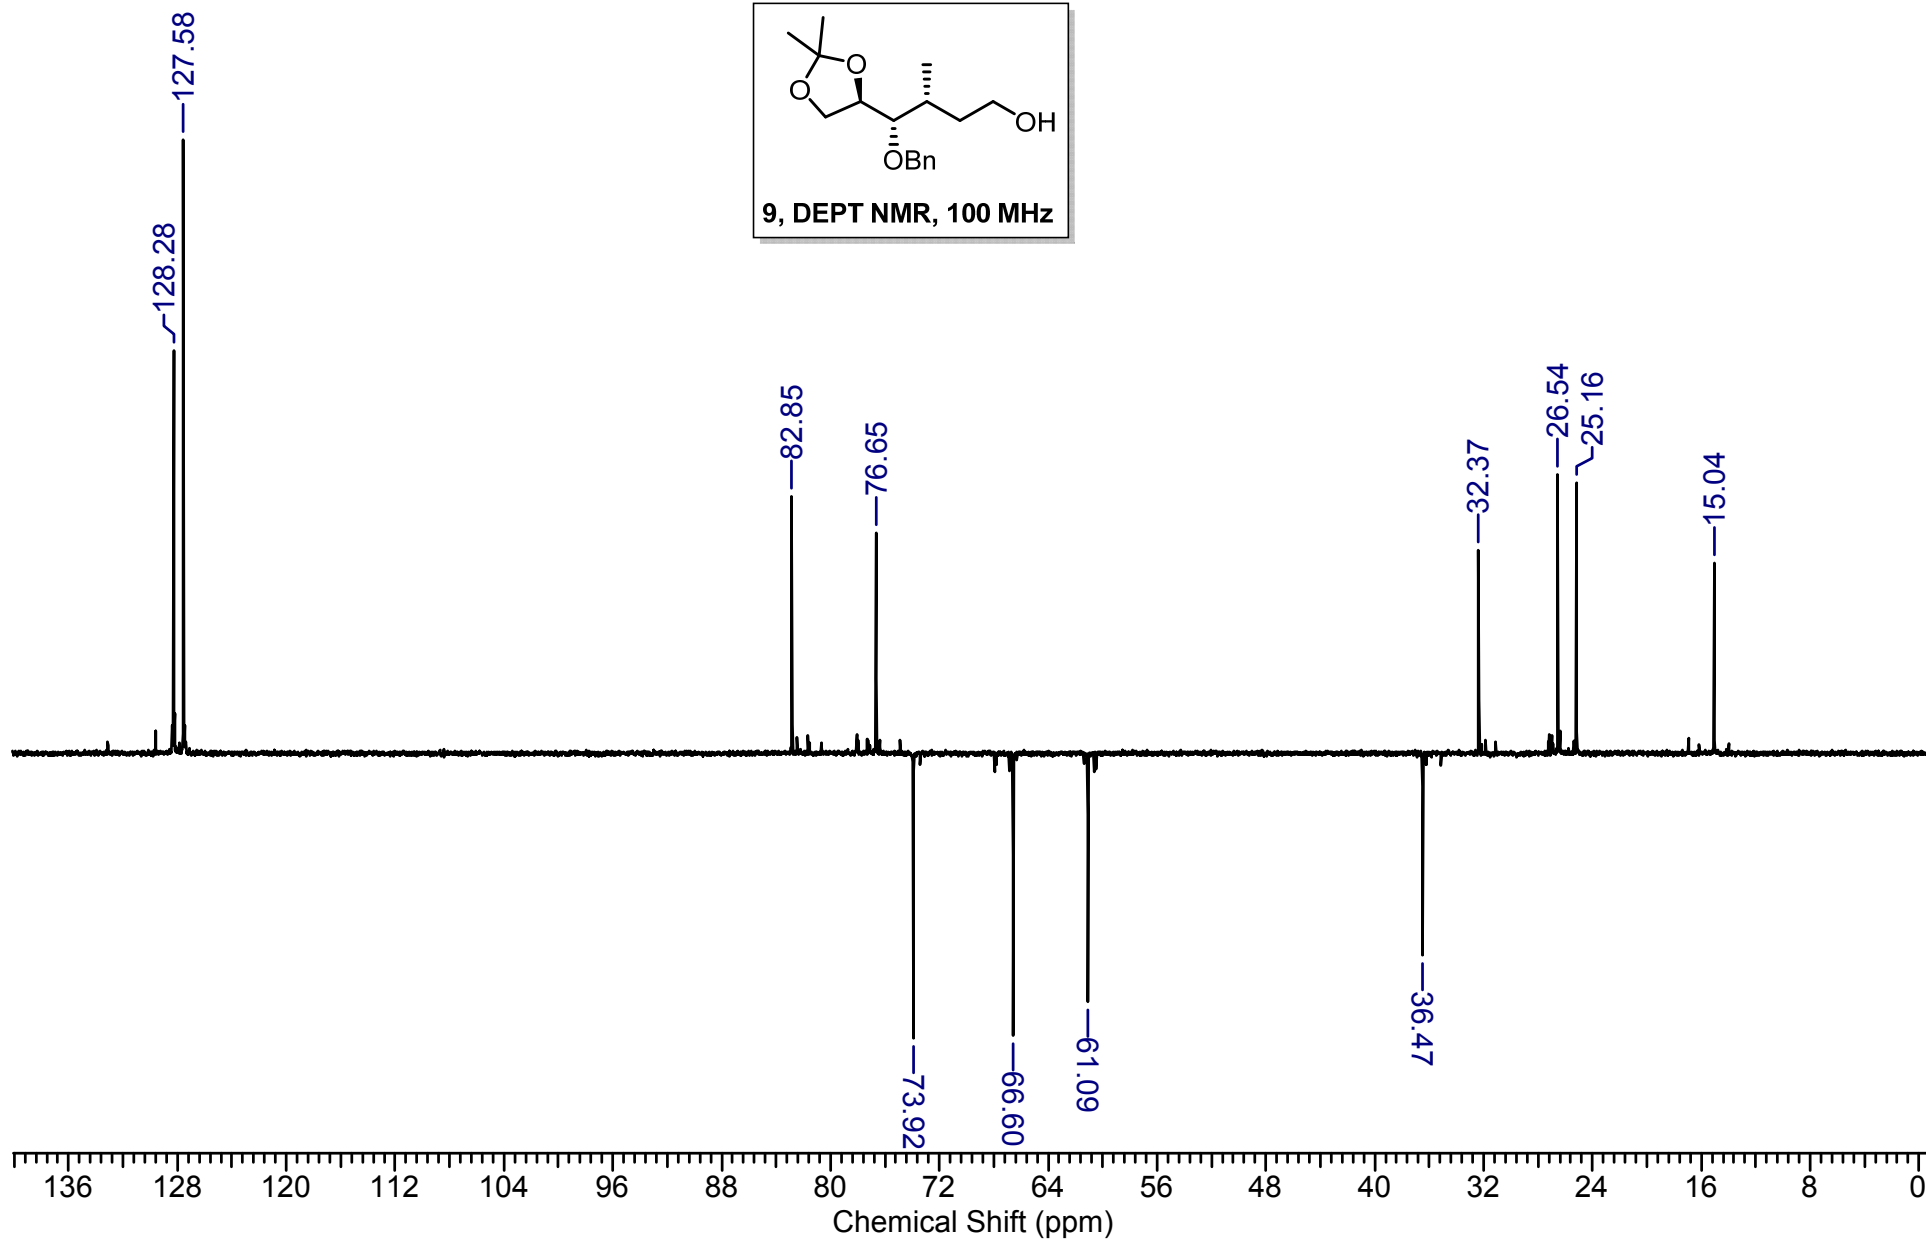

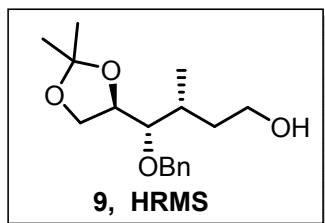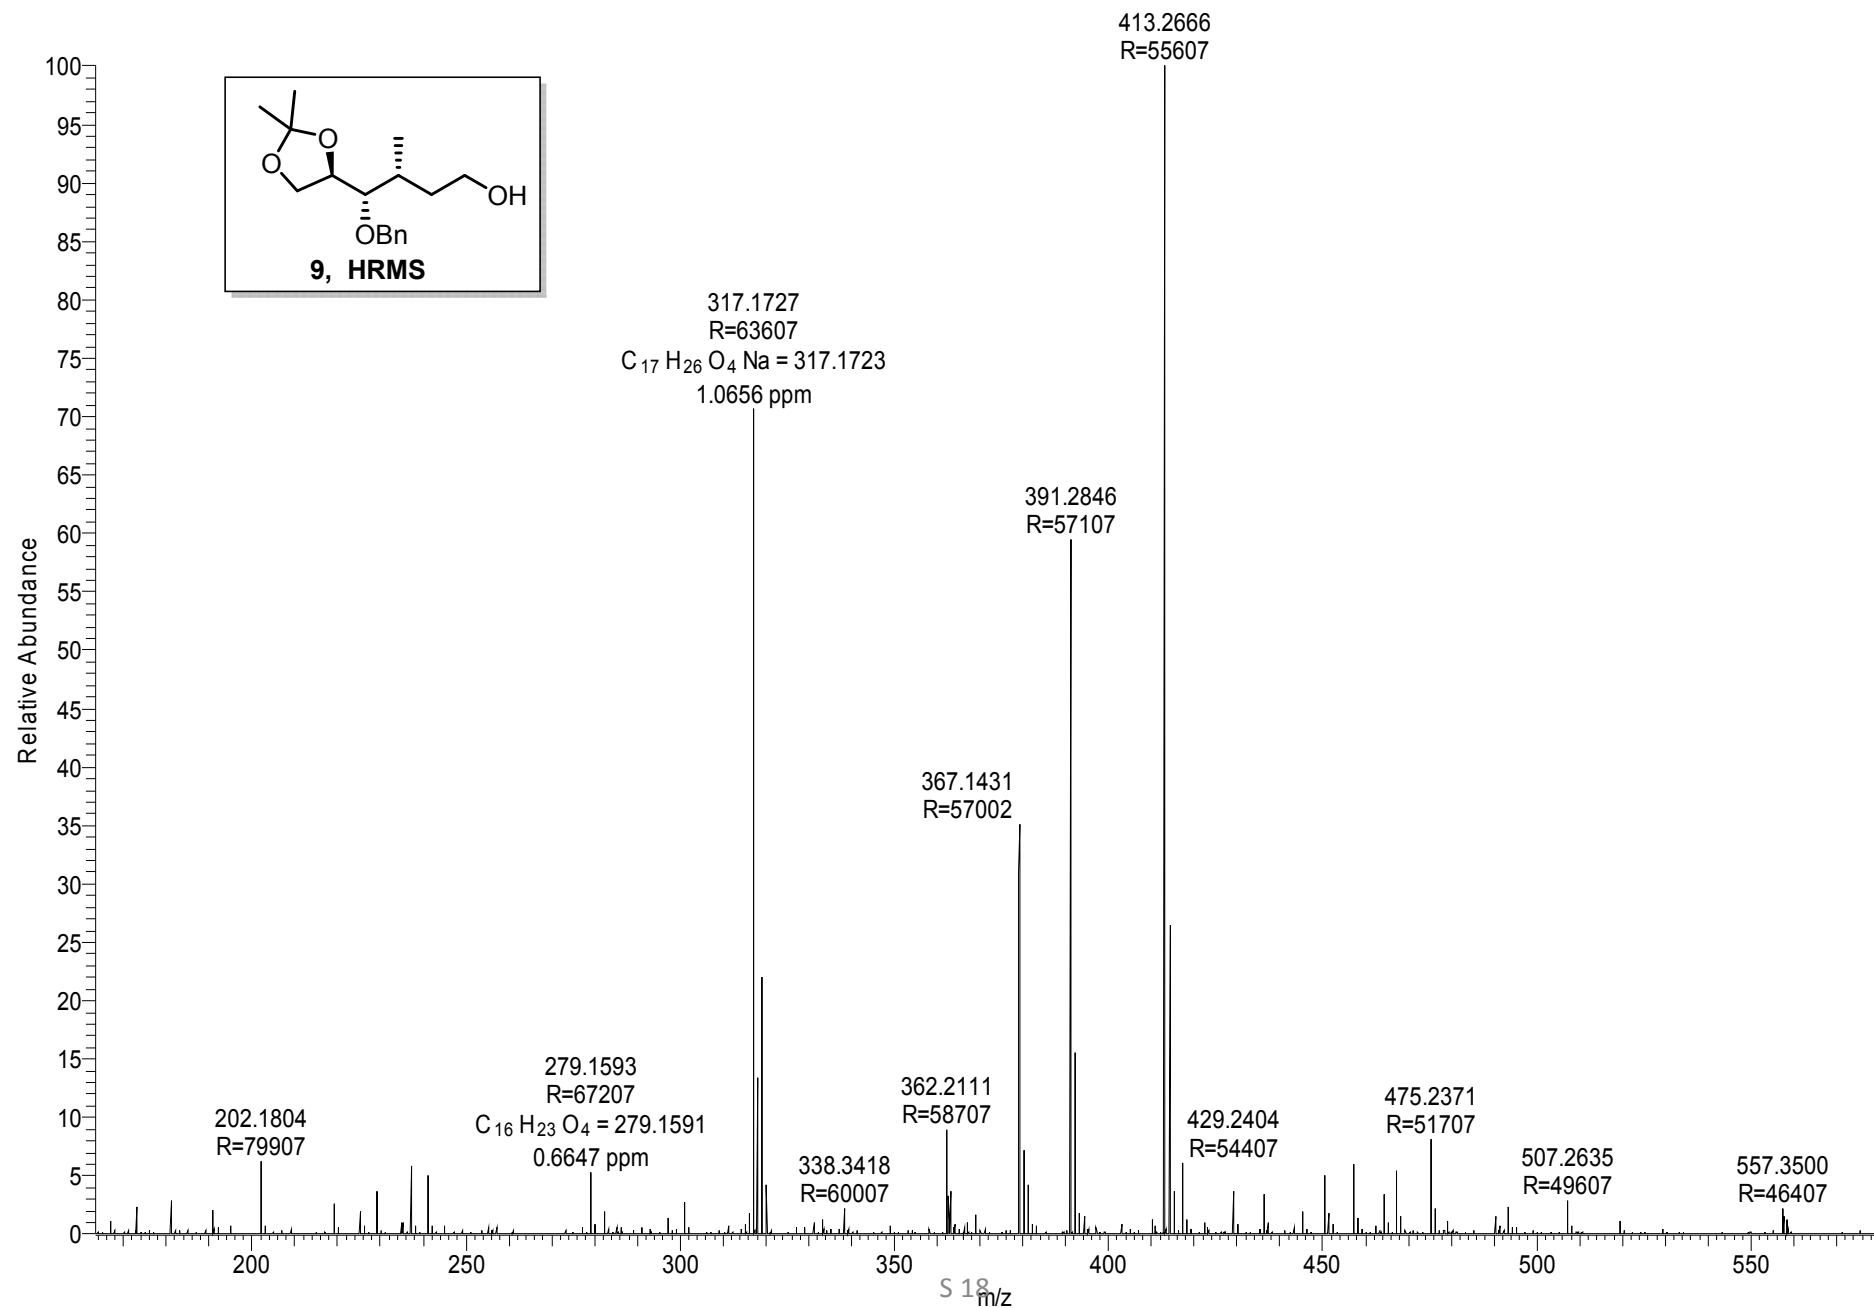

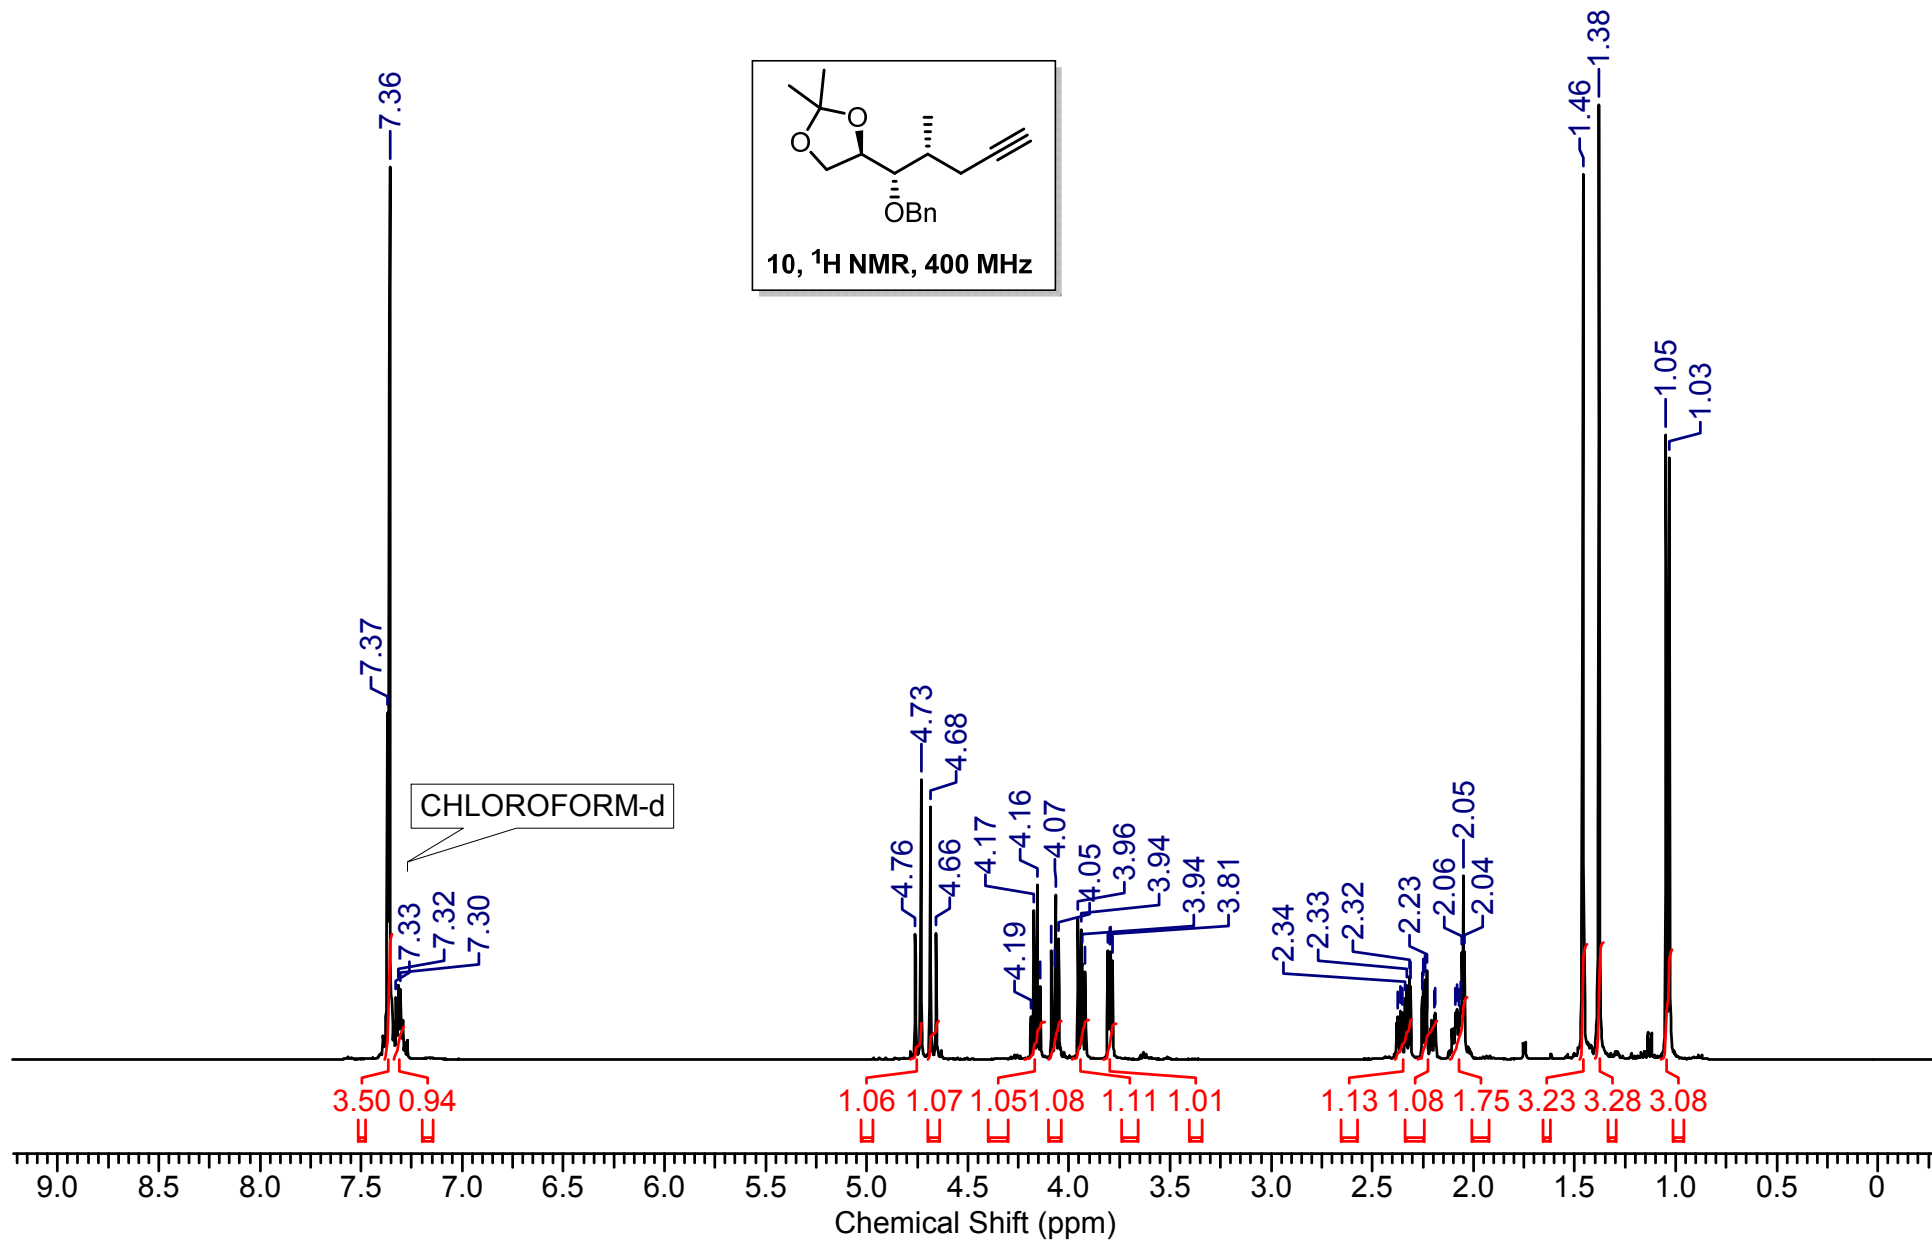

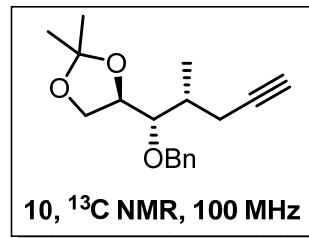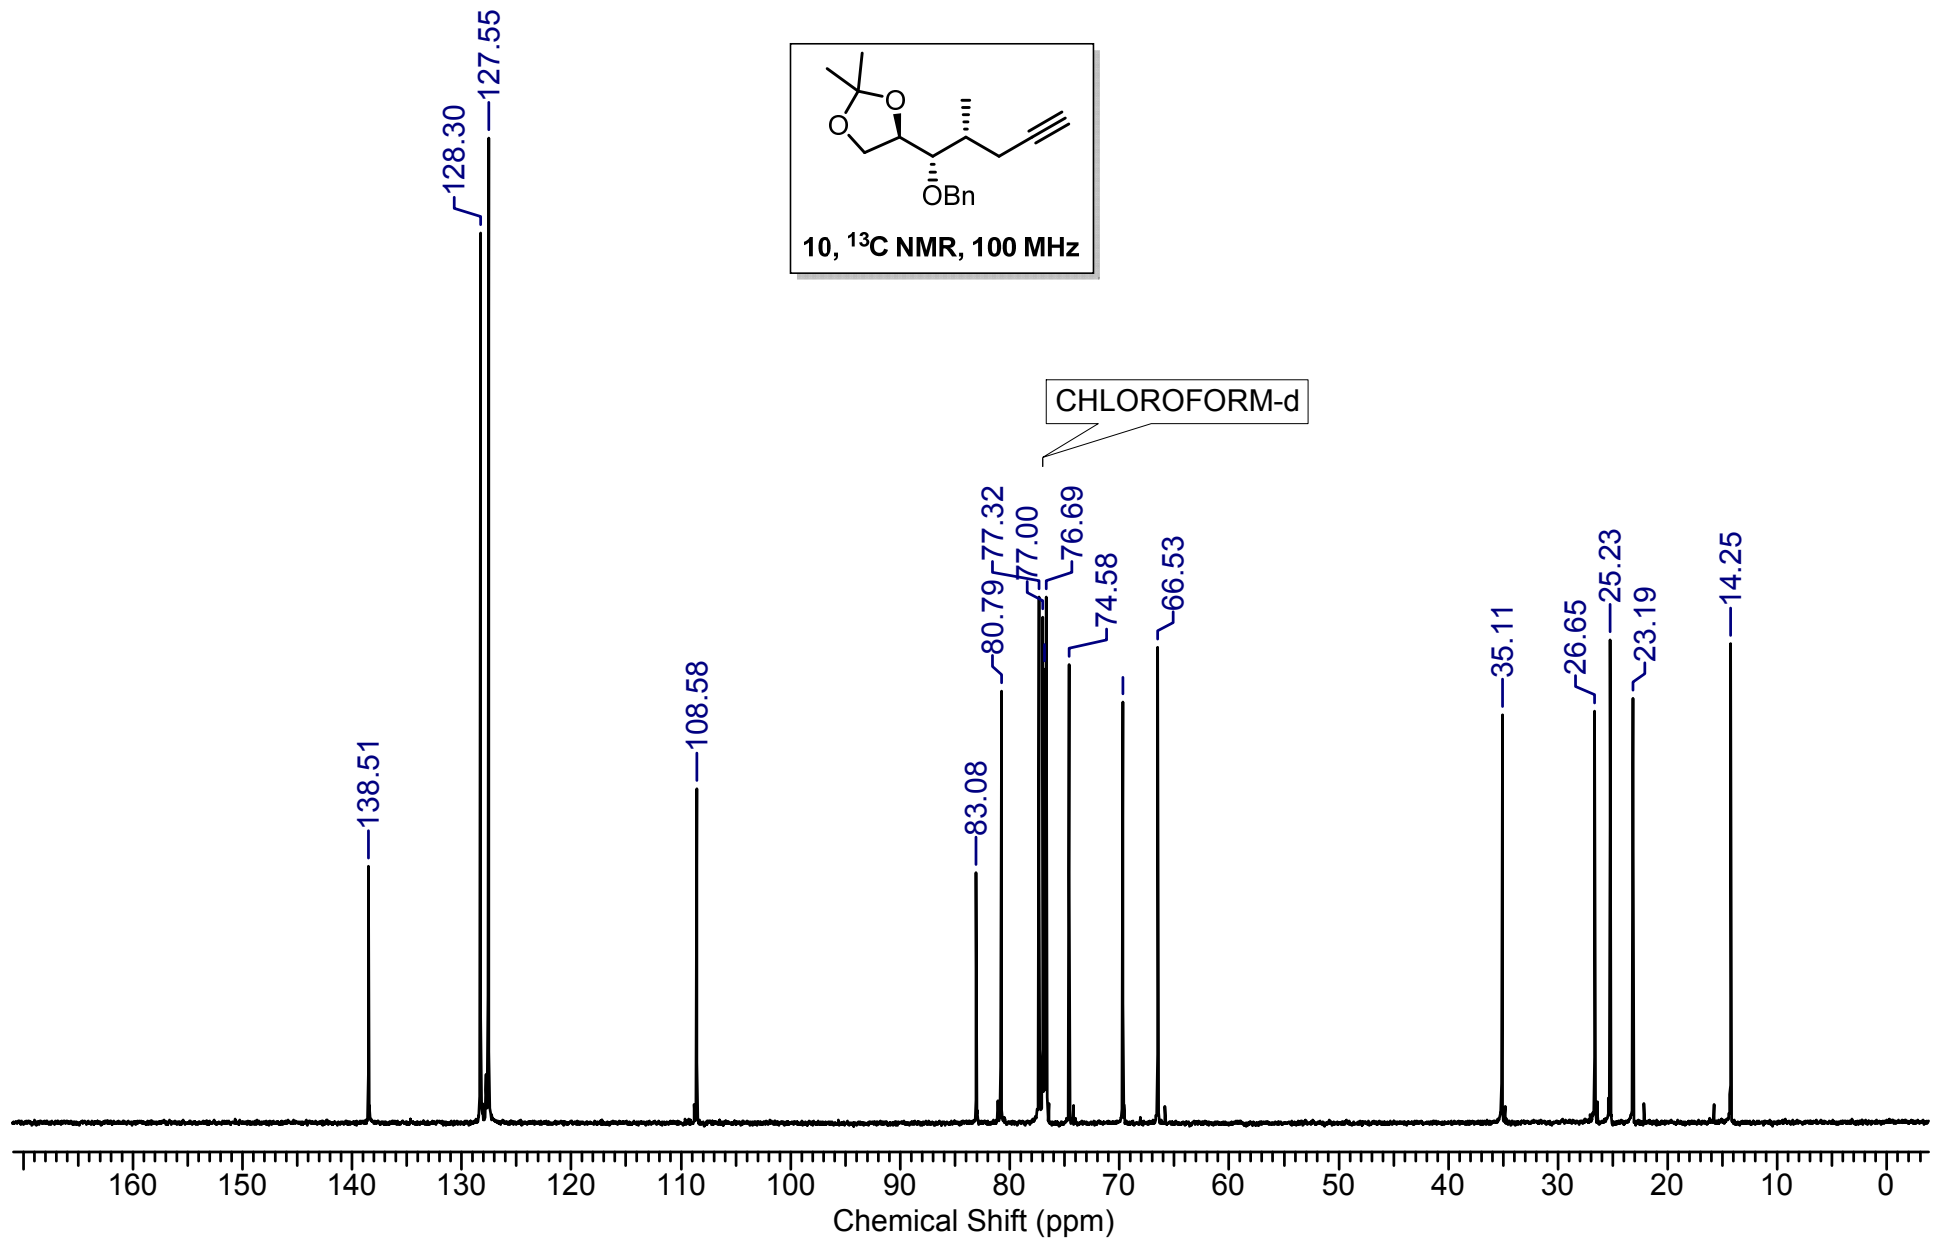

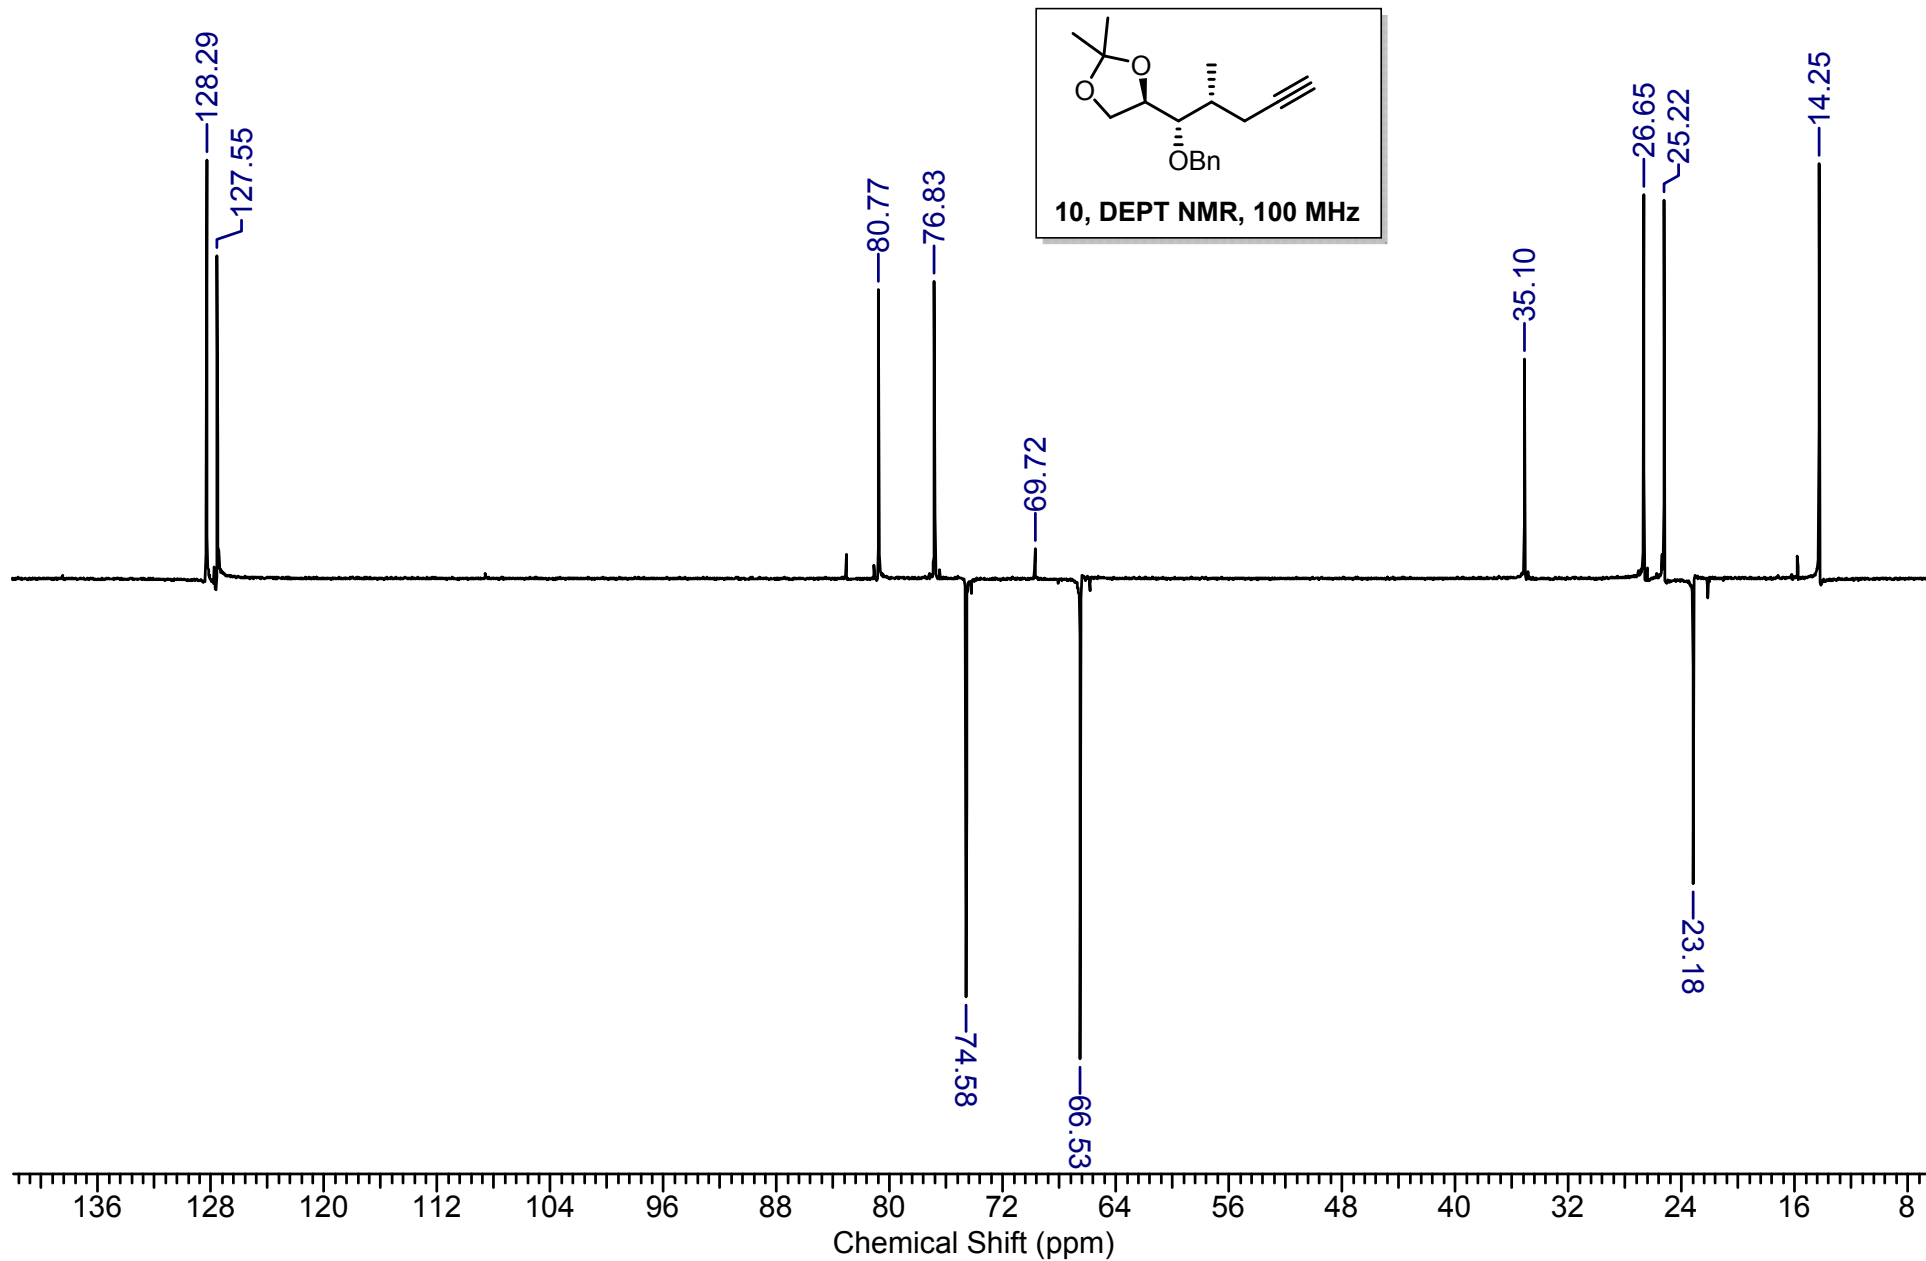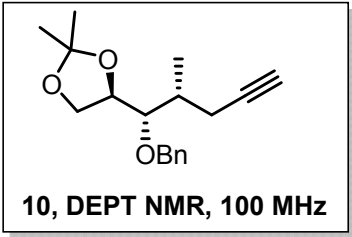

SS-4 #293 RT: 1.30 AV: 1 NL: 6.83E8  
T: FTMS + p ESI Full ms [133.4000-2000.0000]

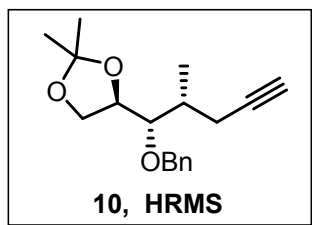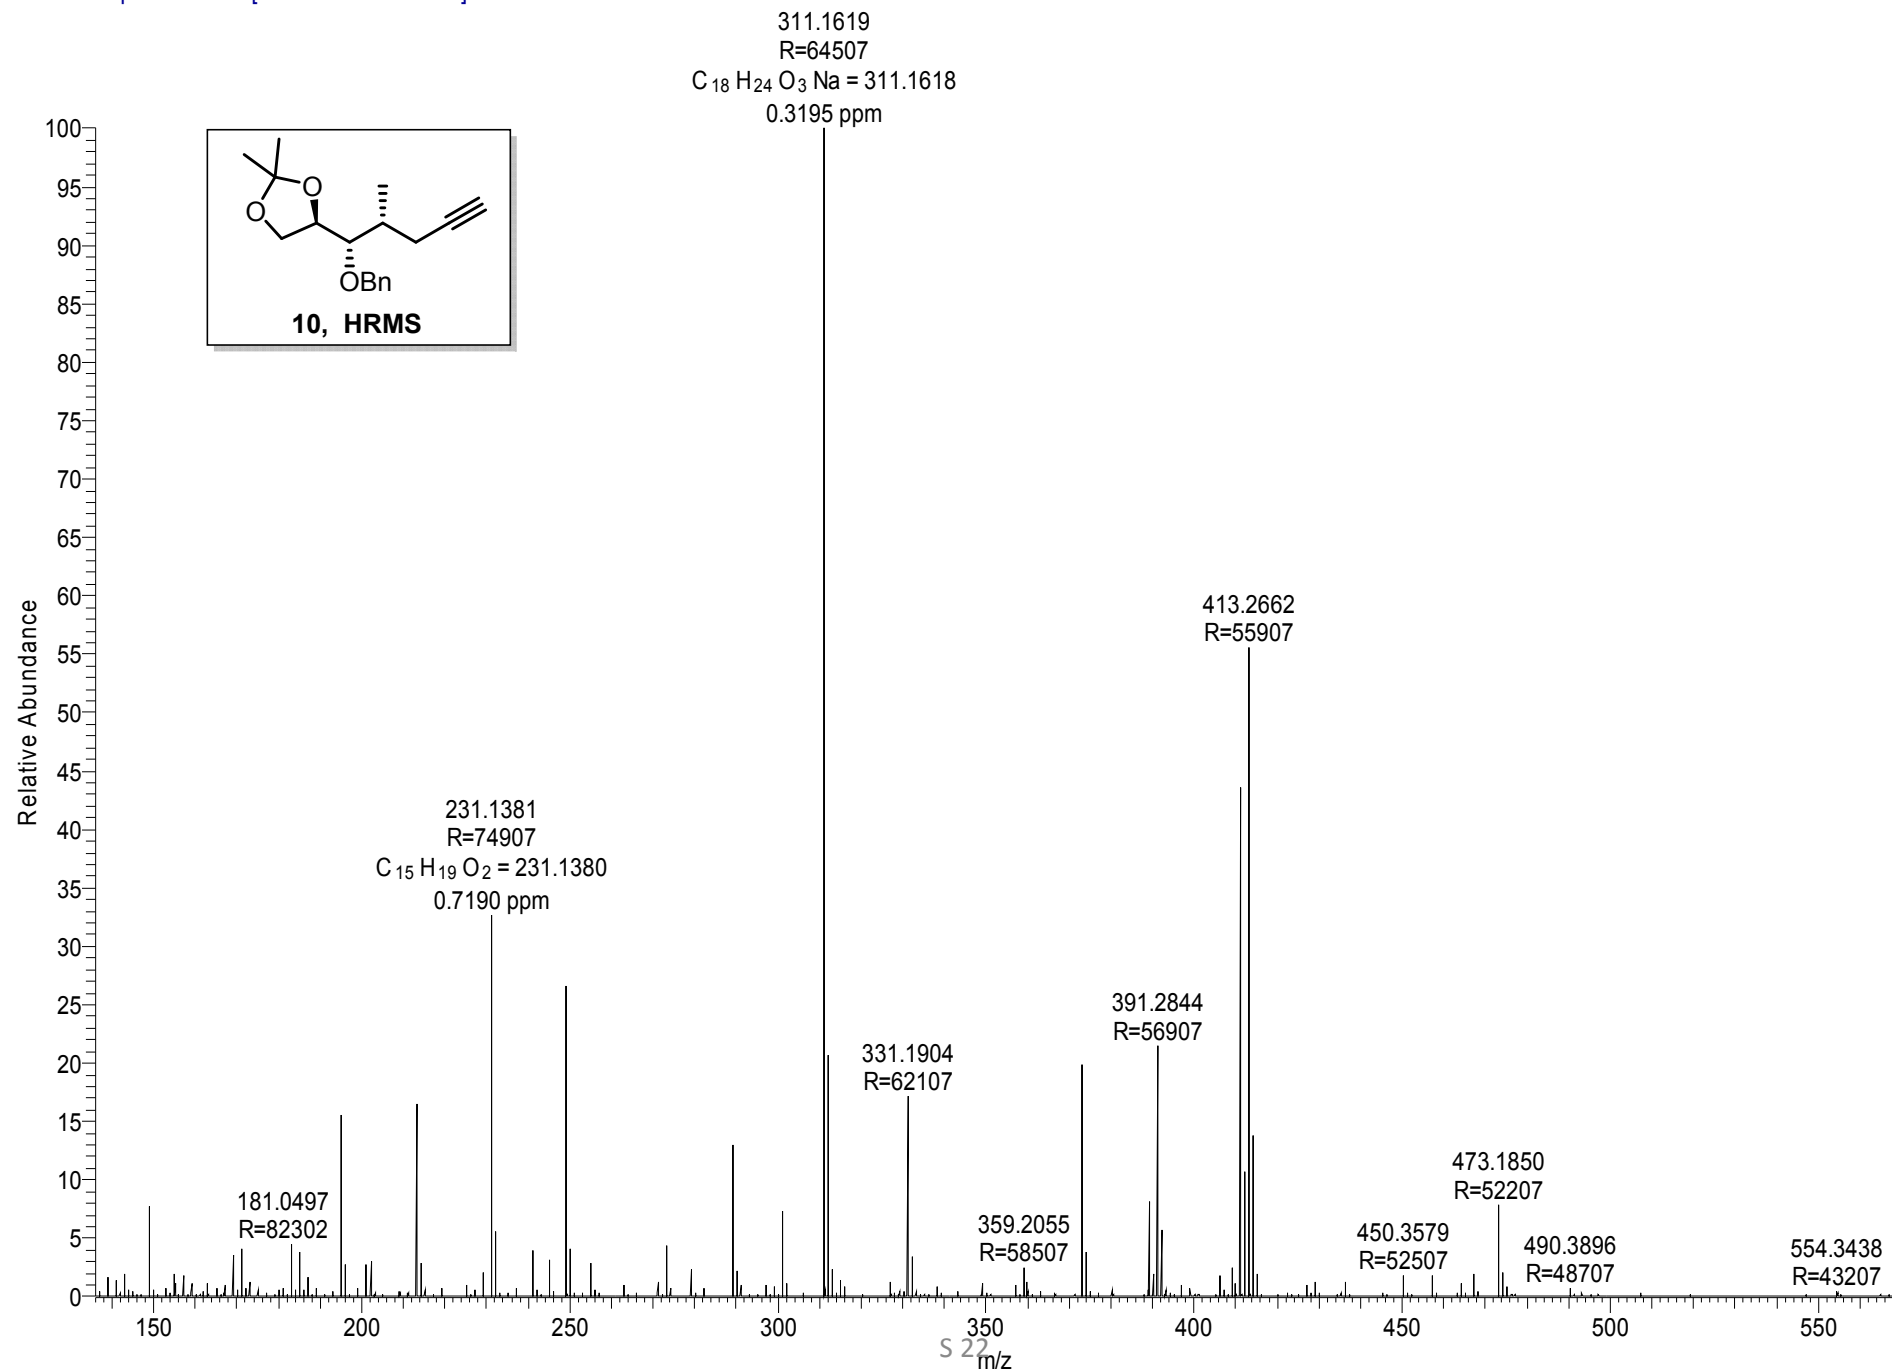

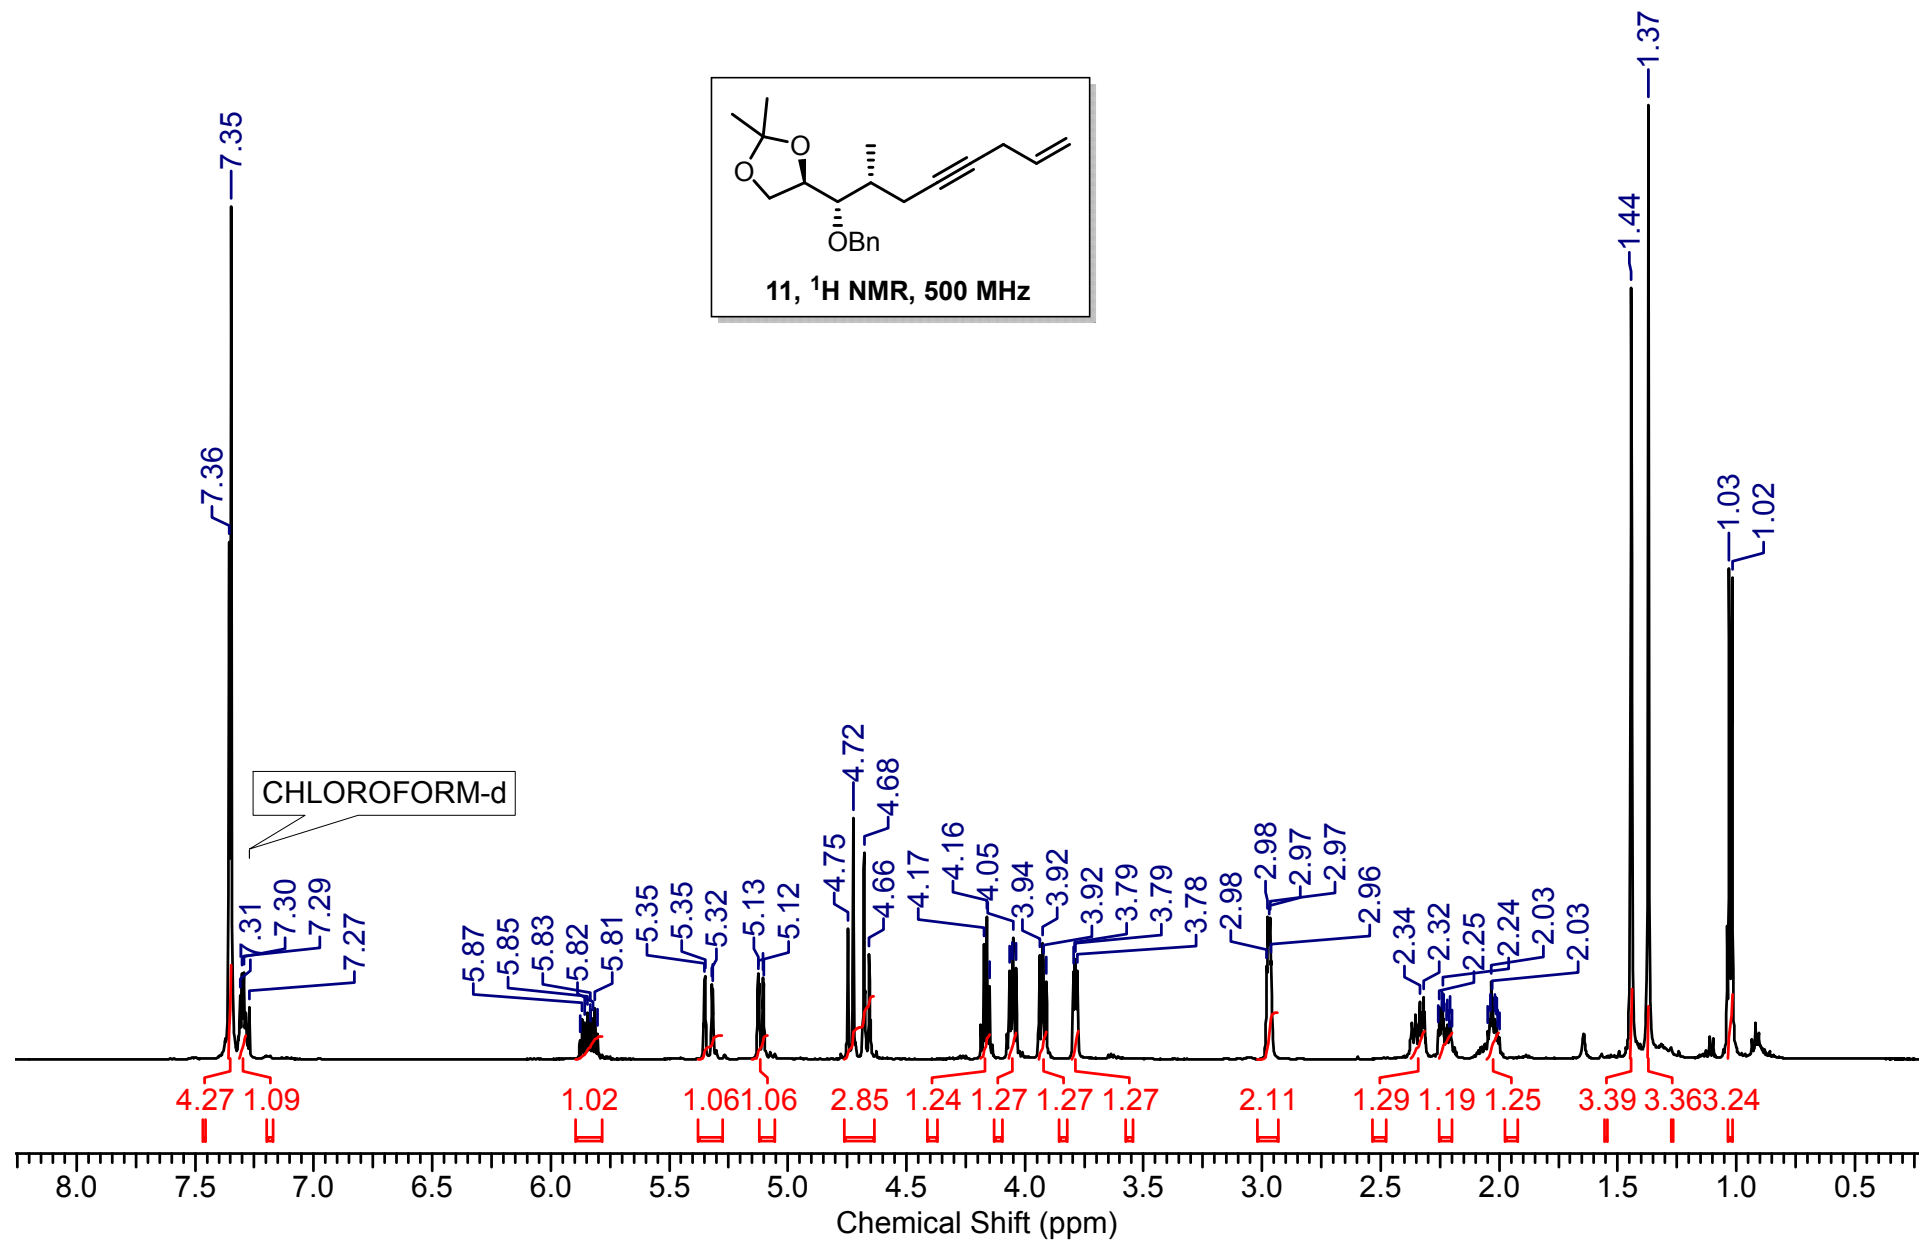

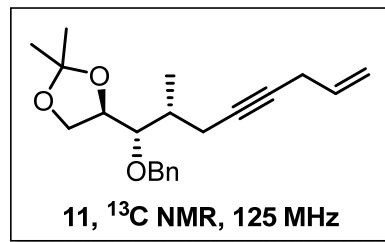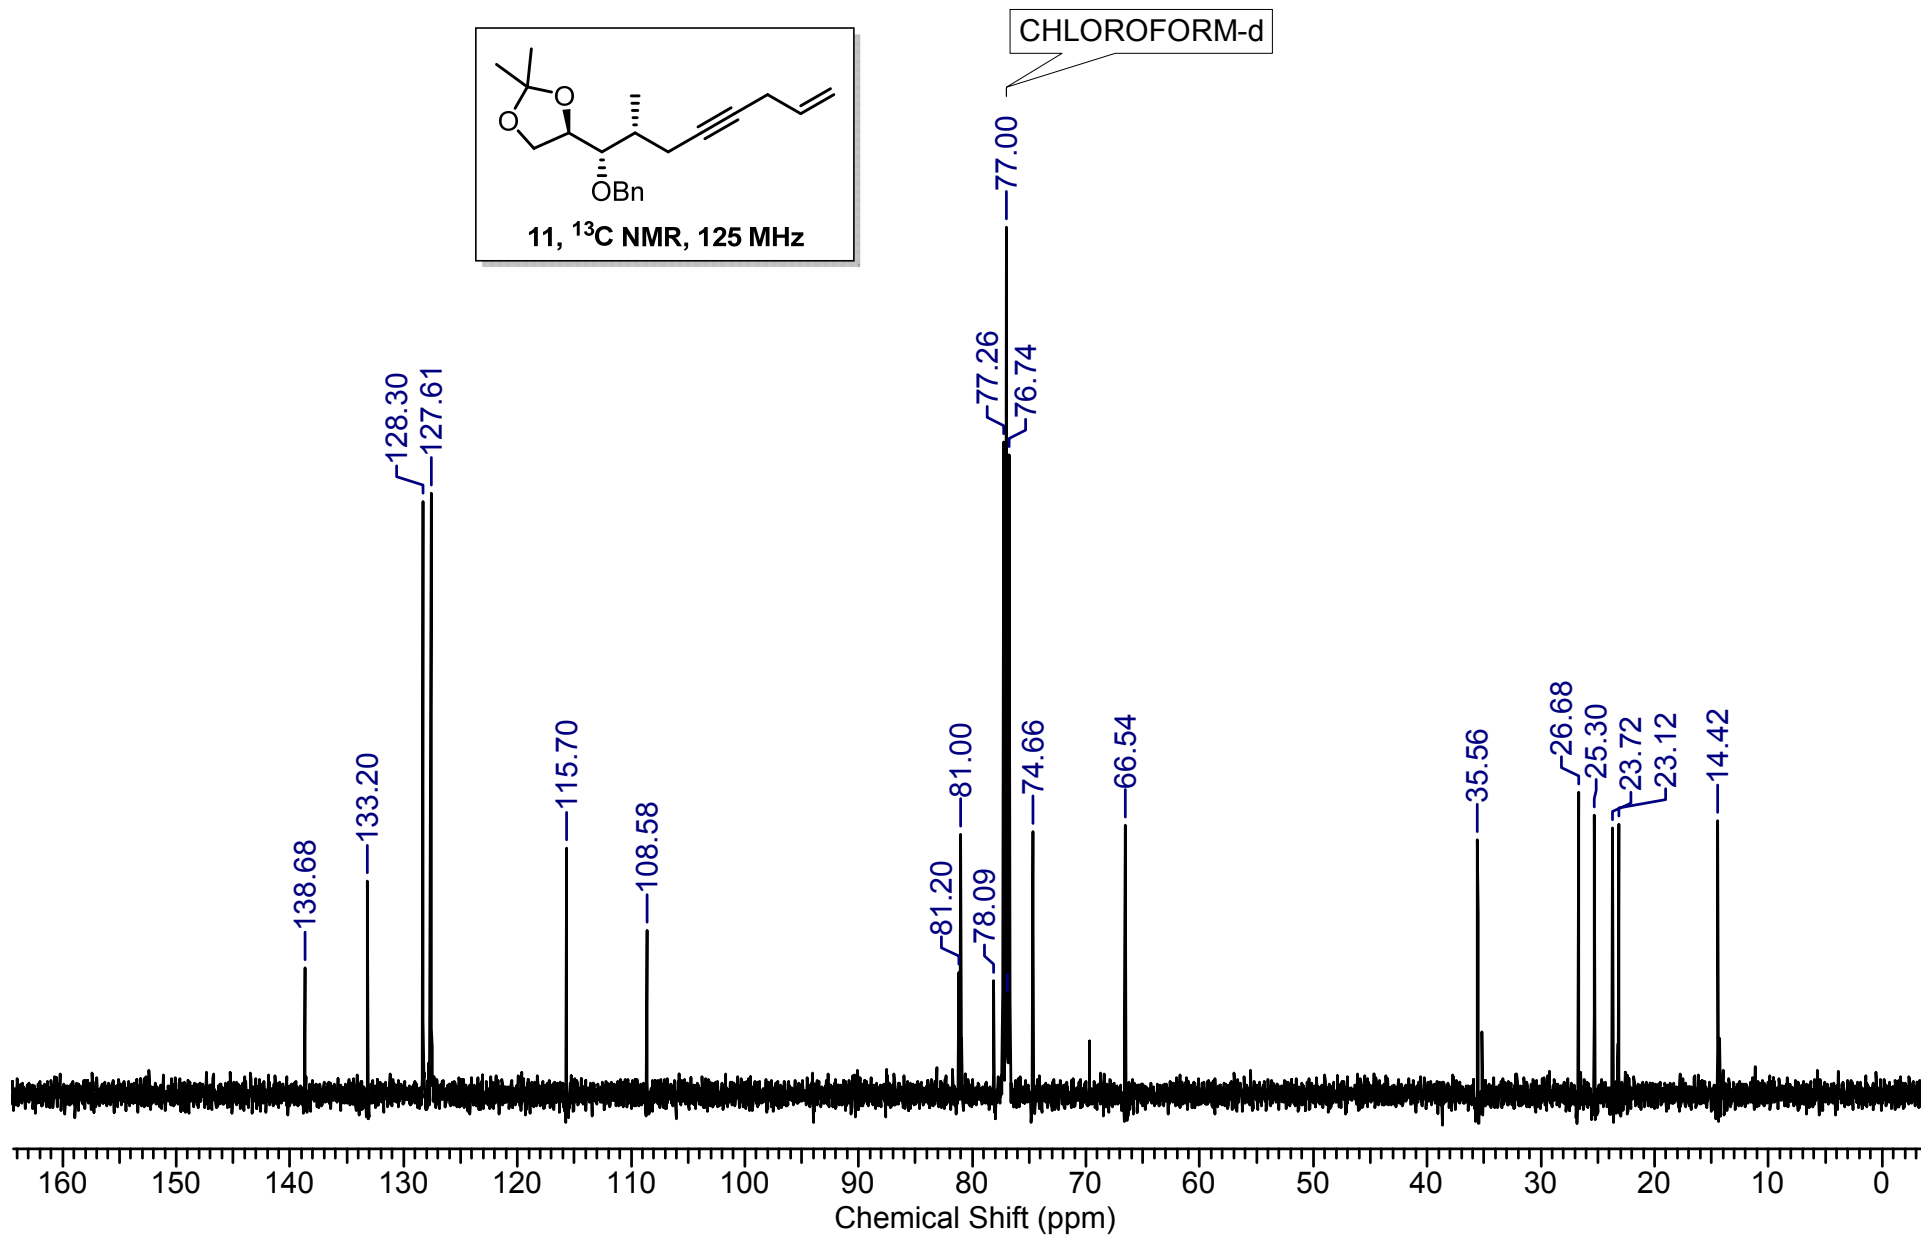



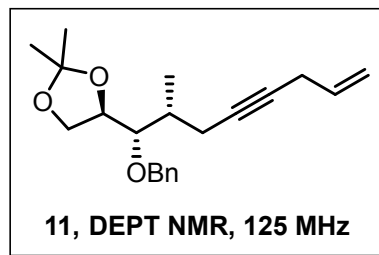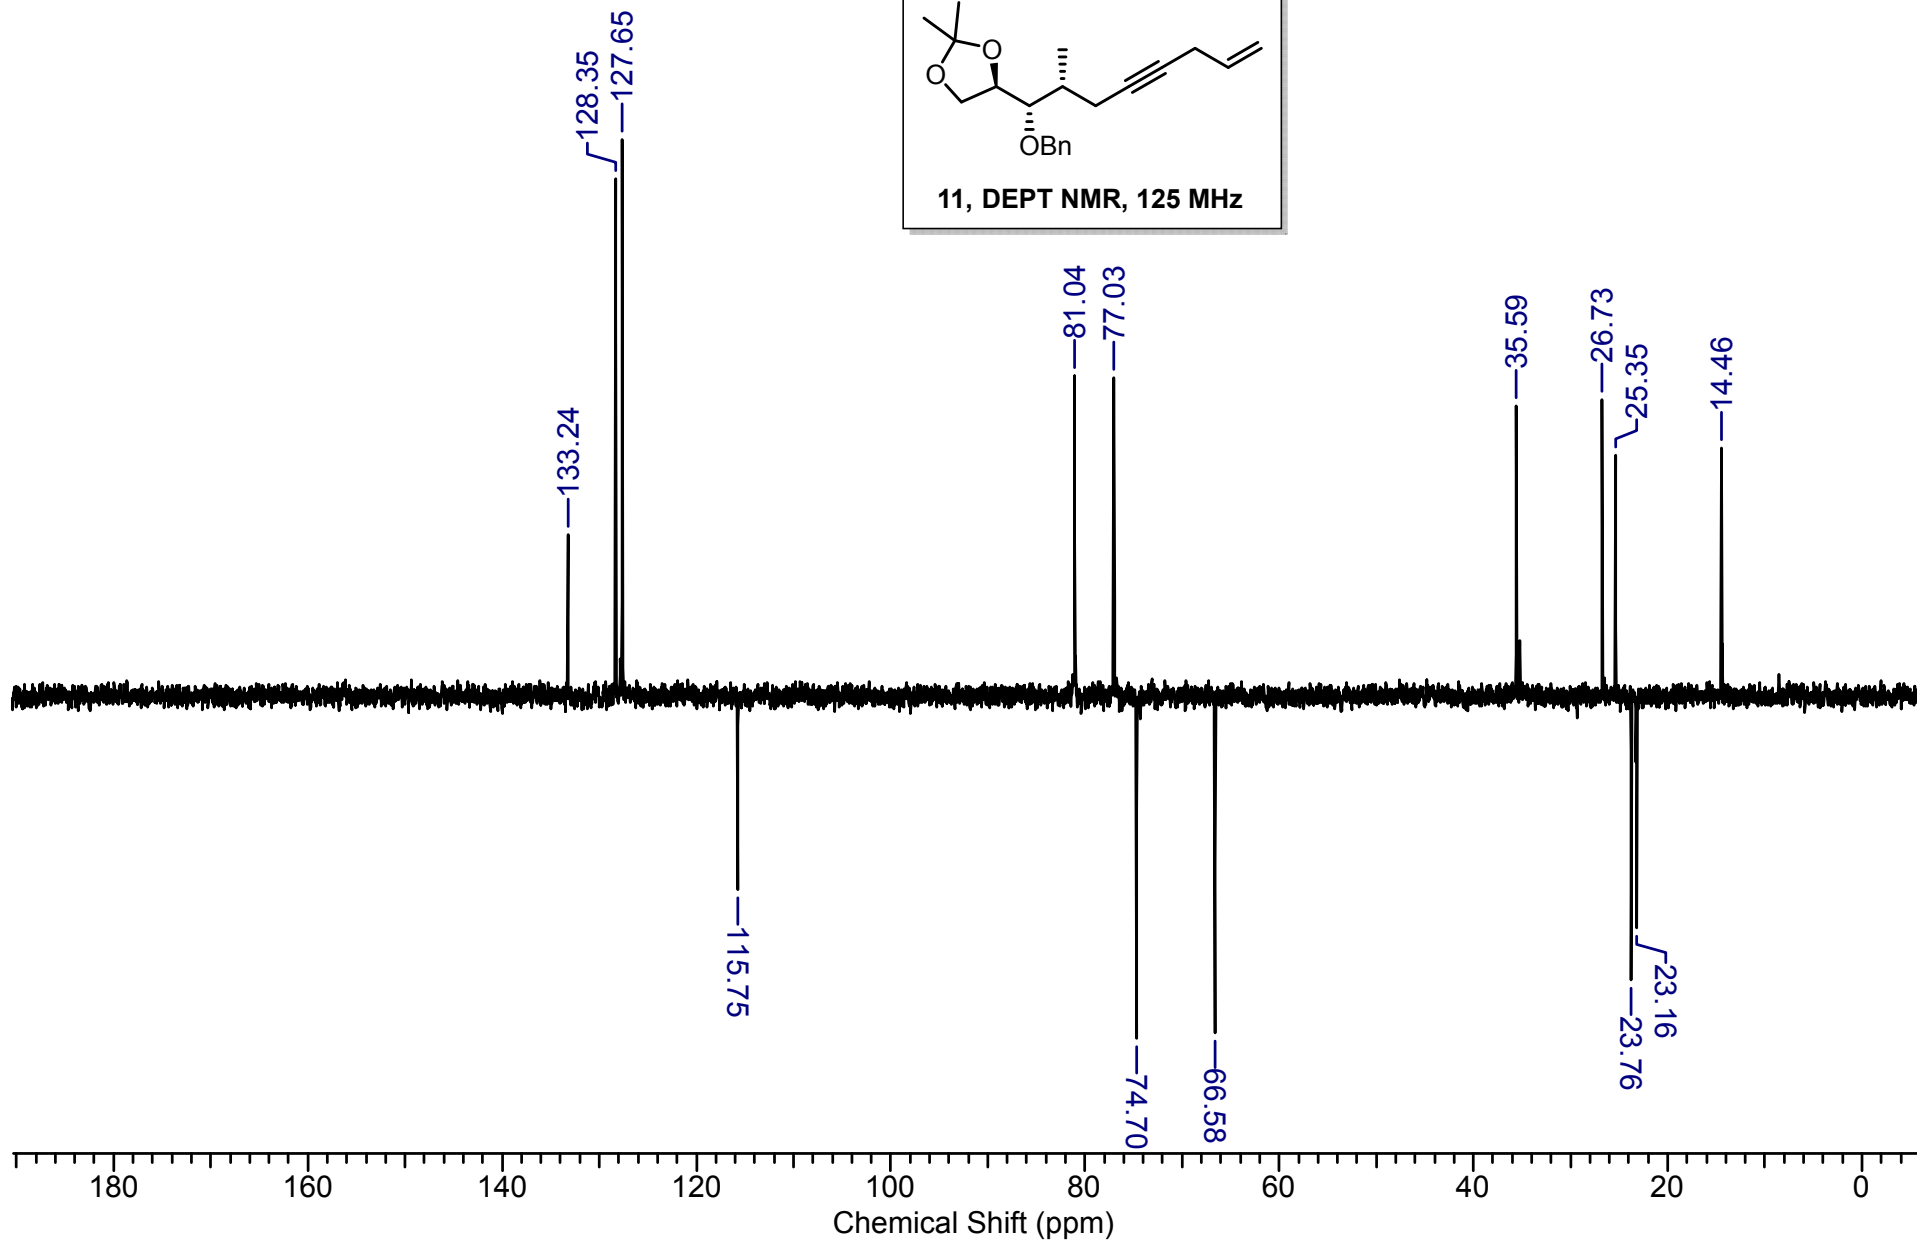

SS-5 #313 RT: 1.39 AV: 1 NL: 2.44E8  
T: FTMS + p ESI Full ms [133.4000-2000.0000]

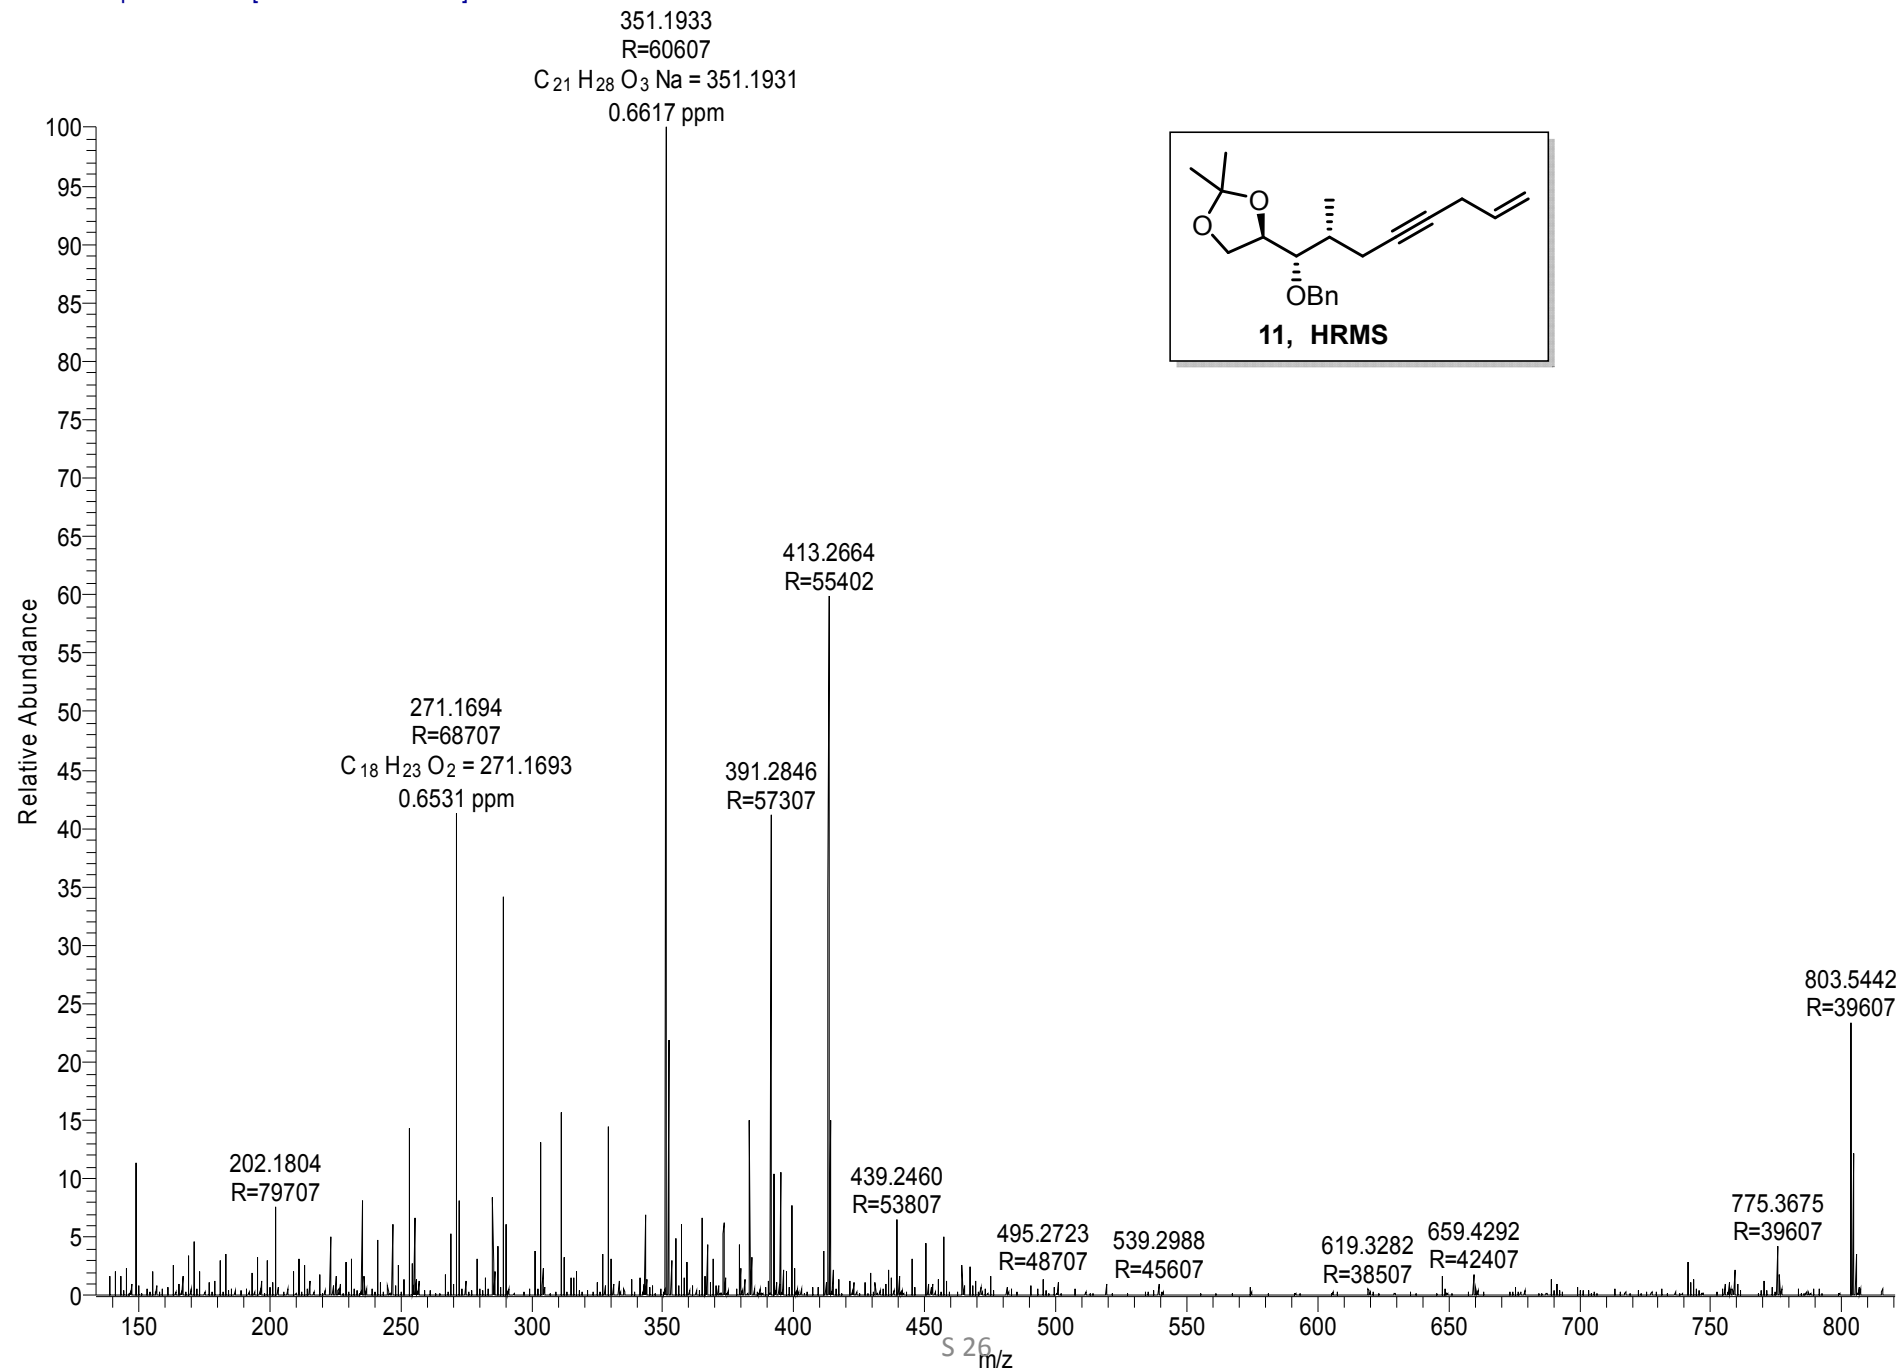

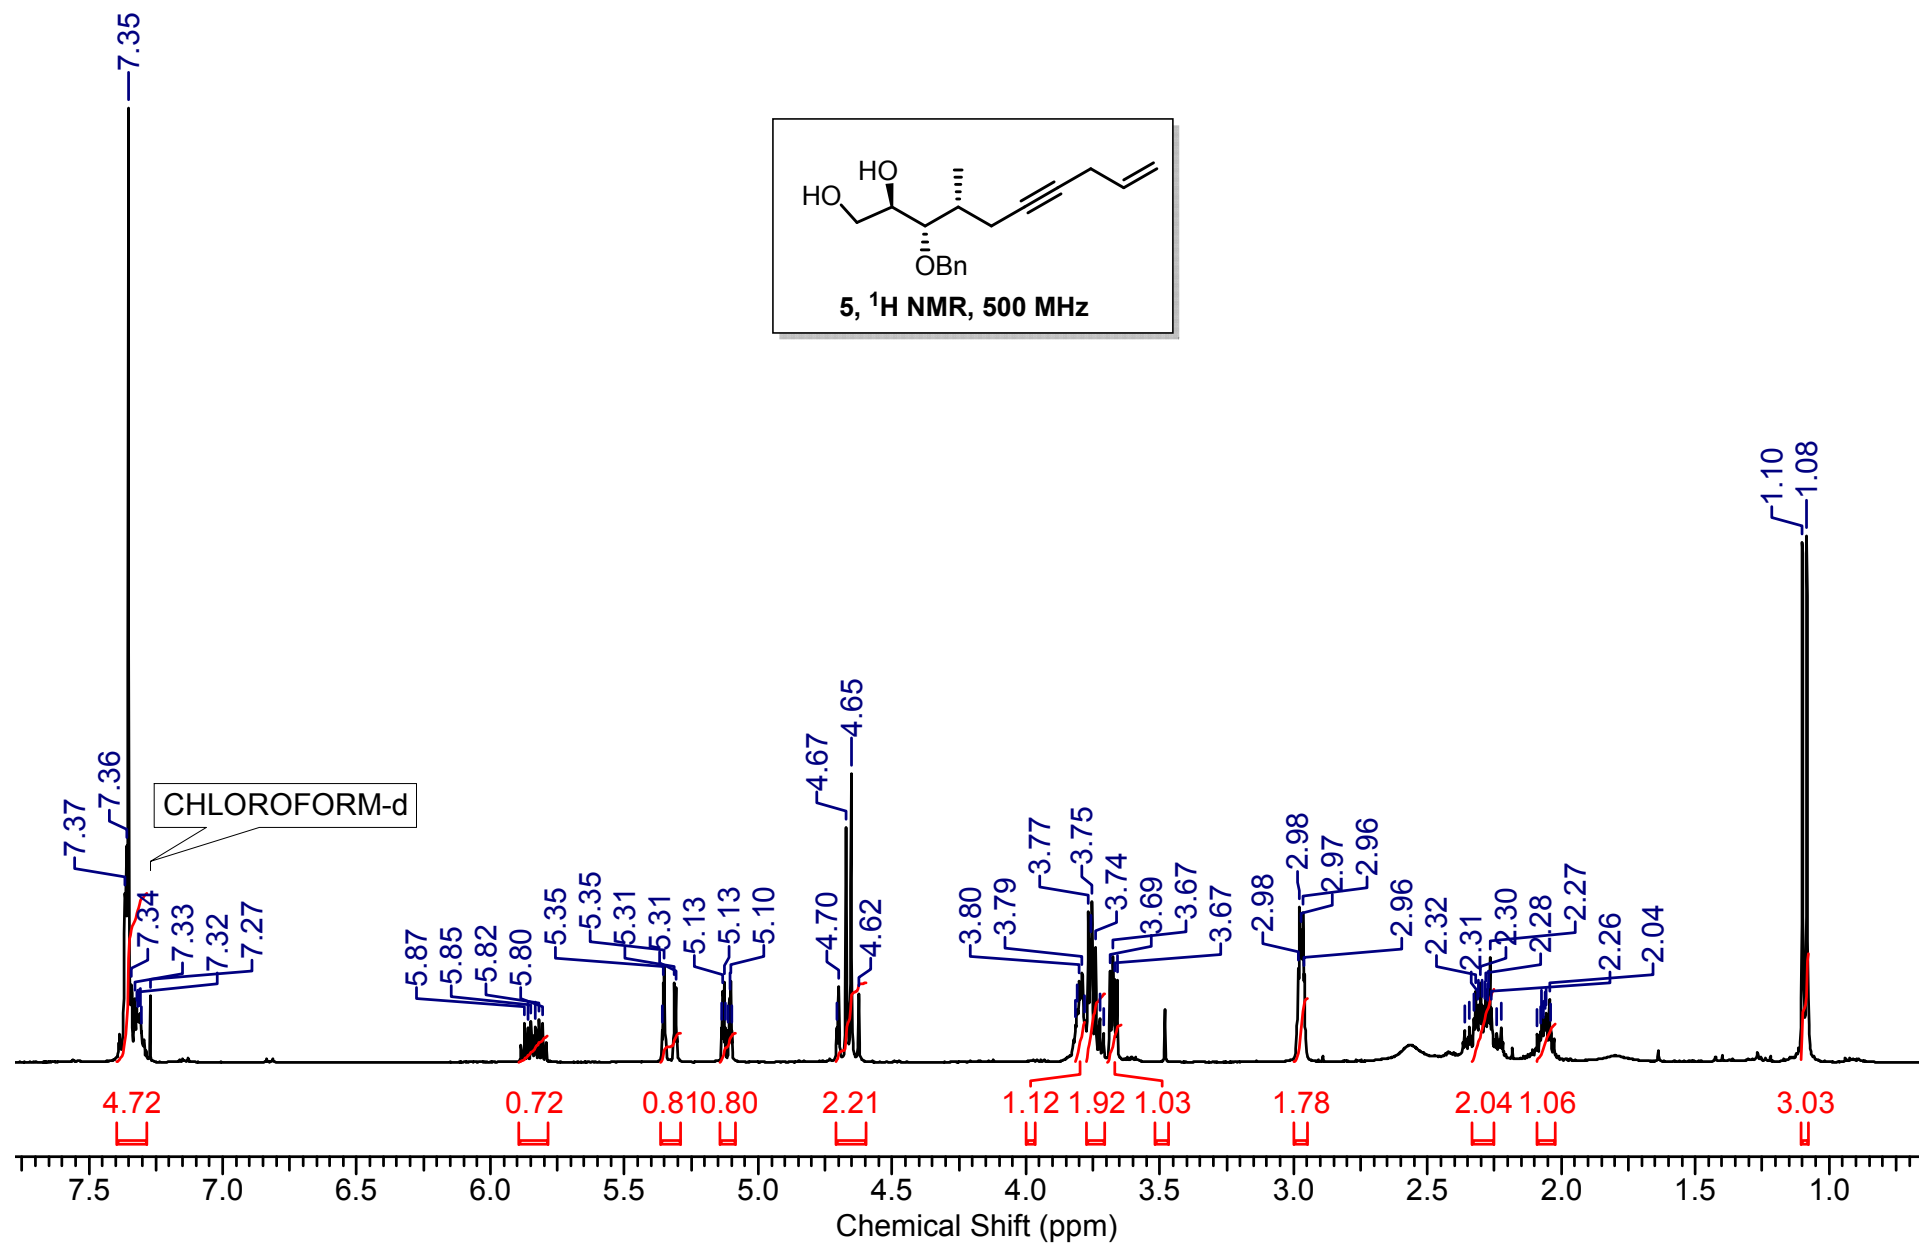

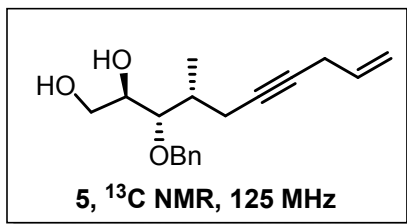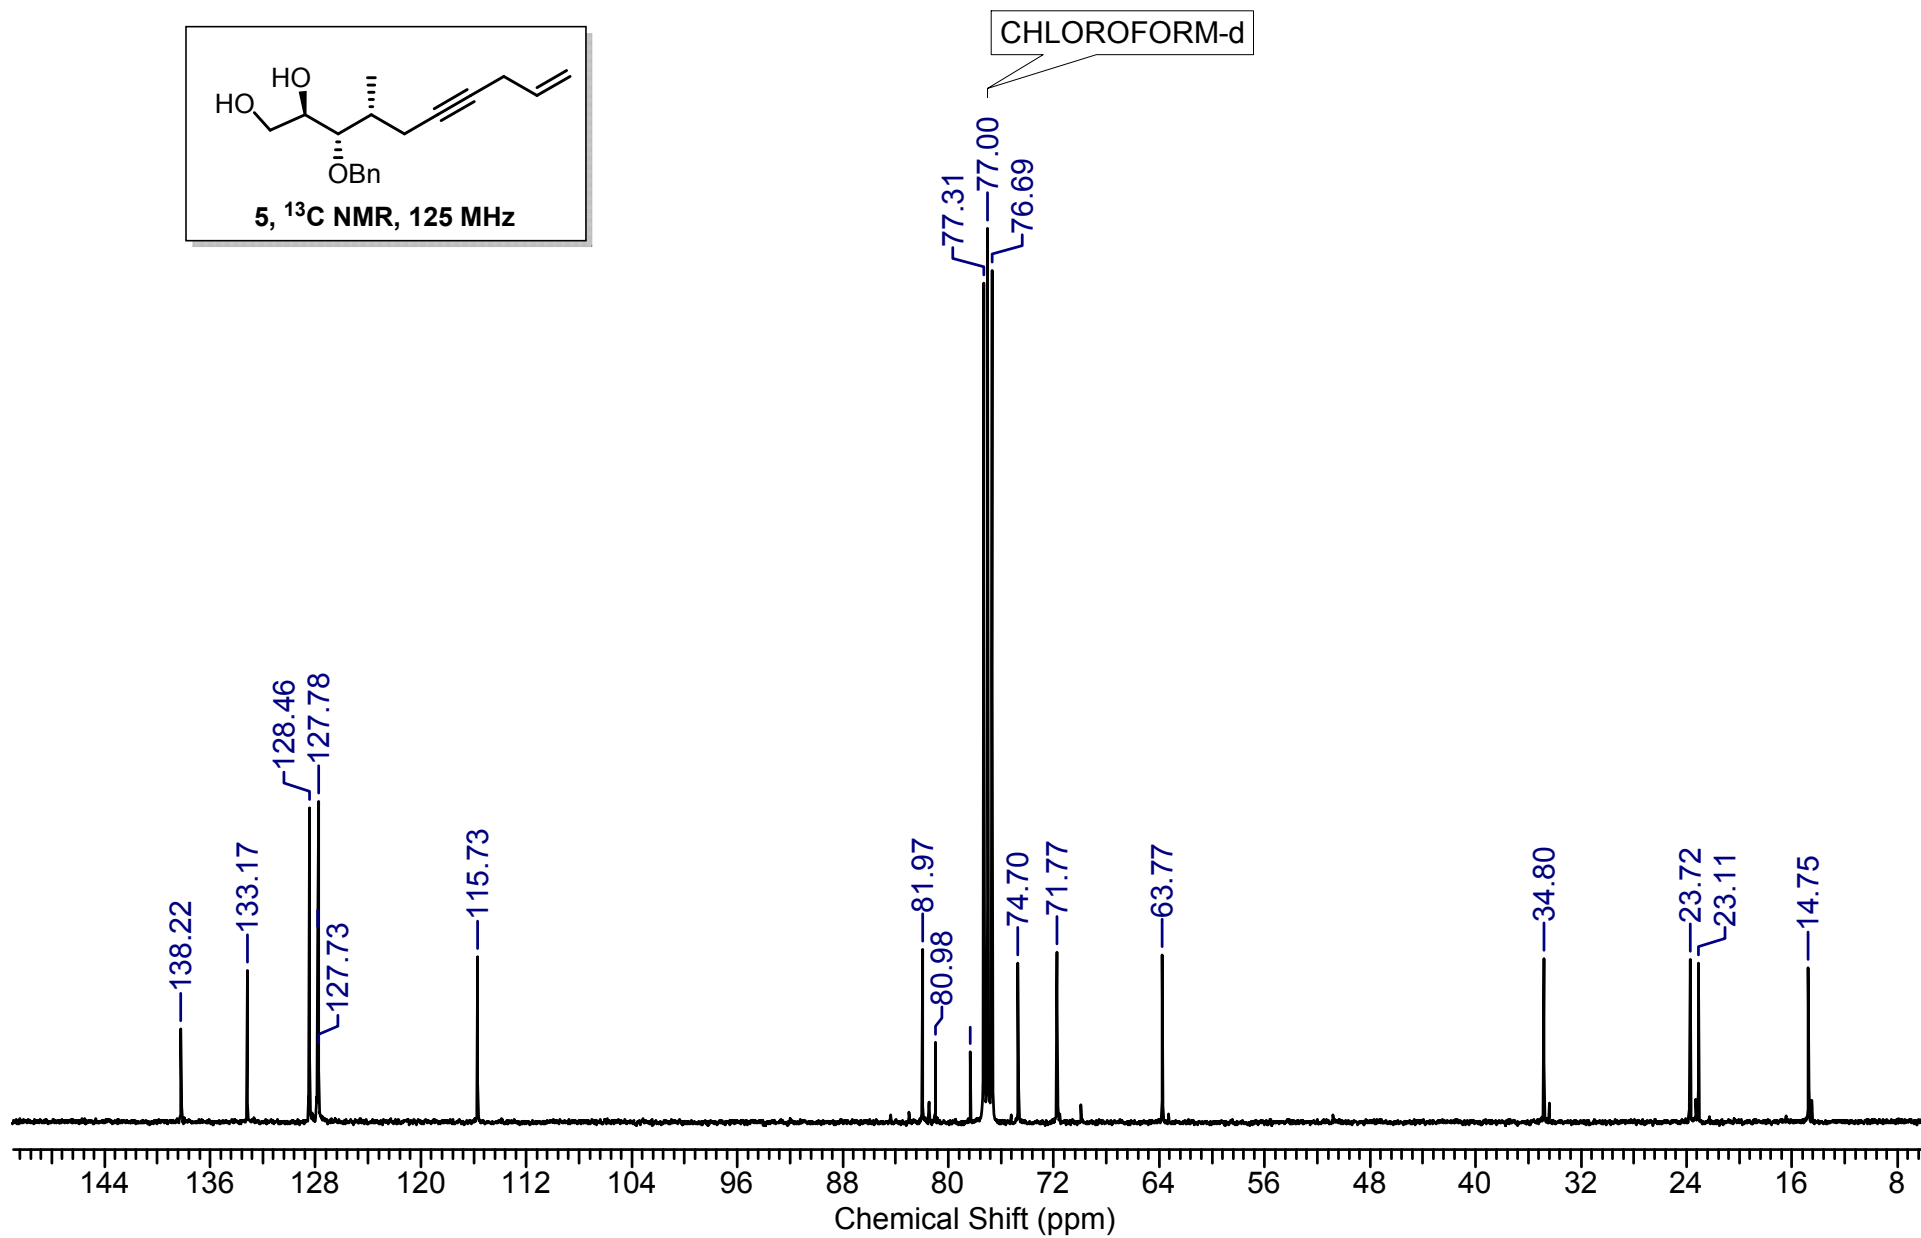

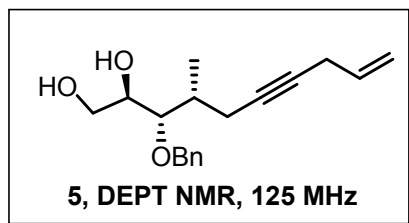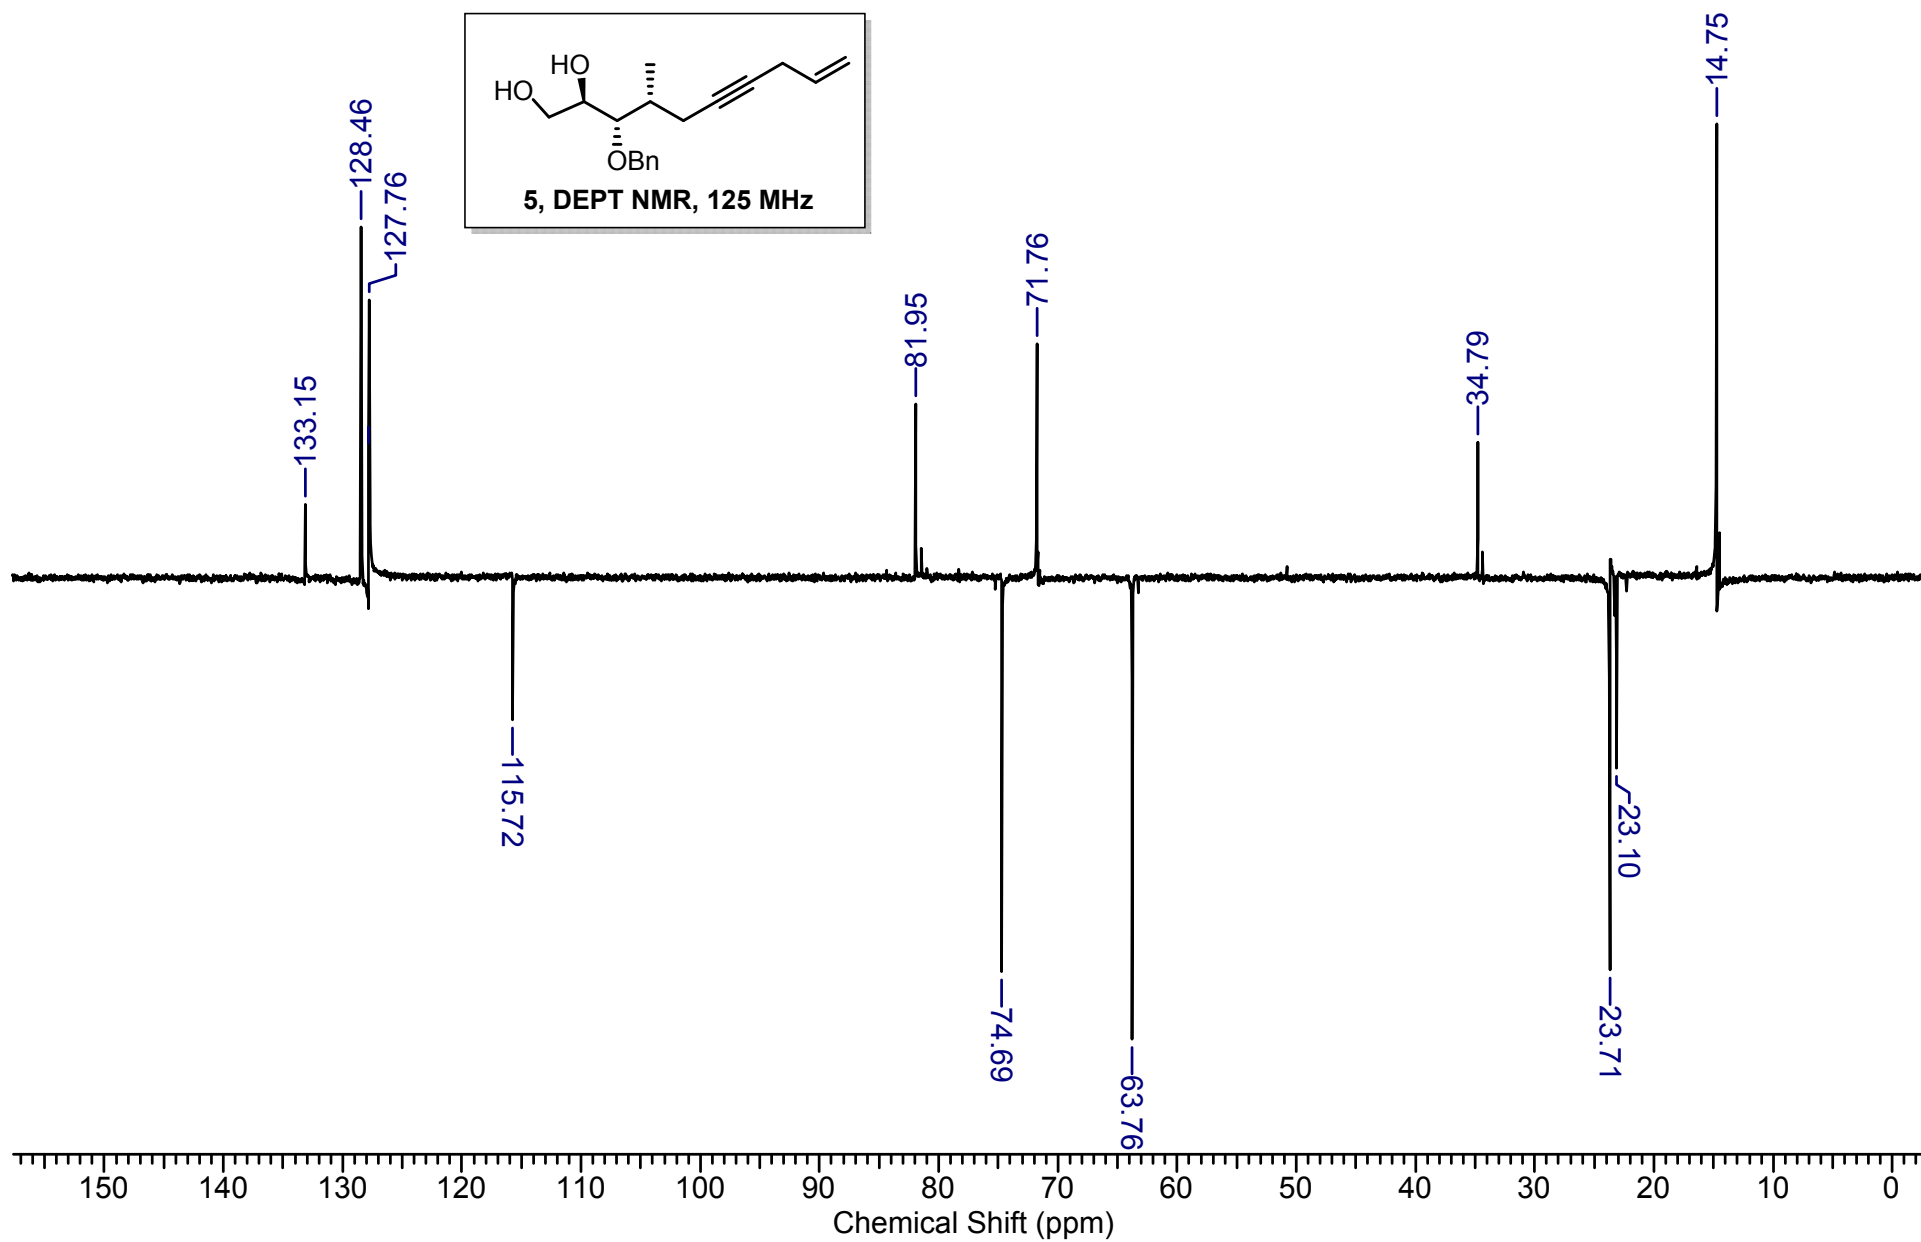

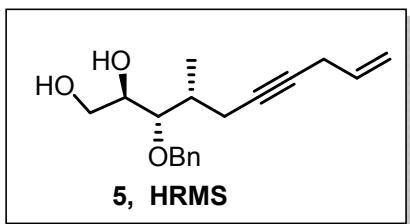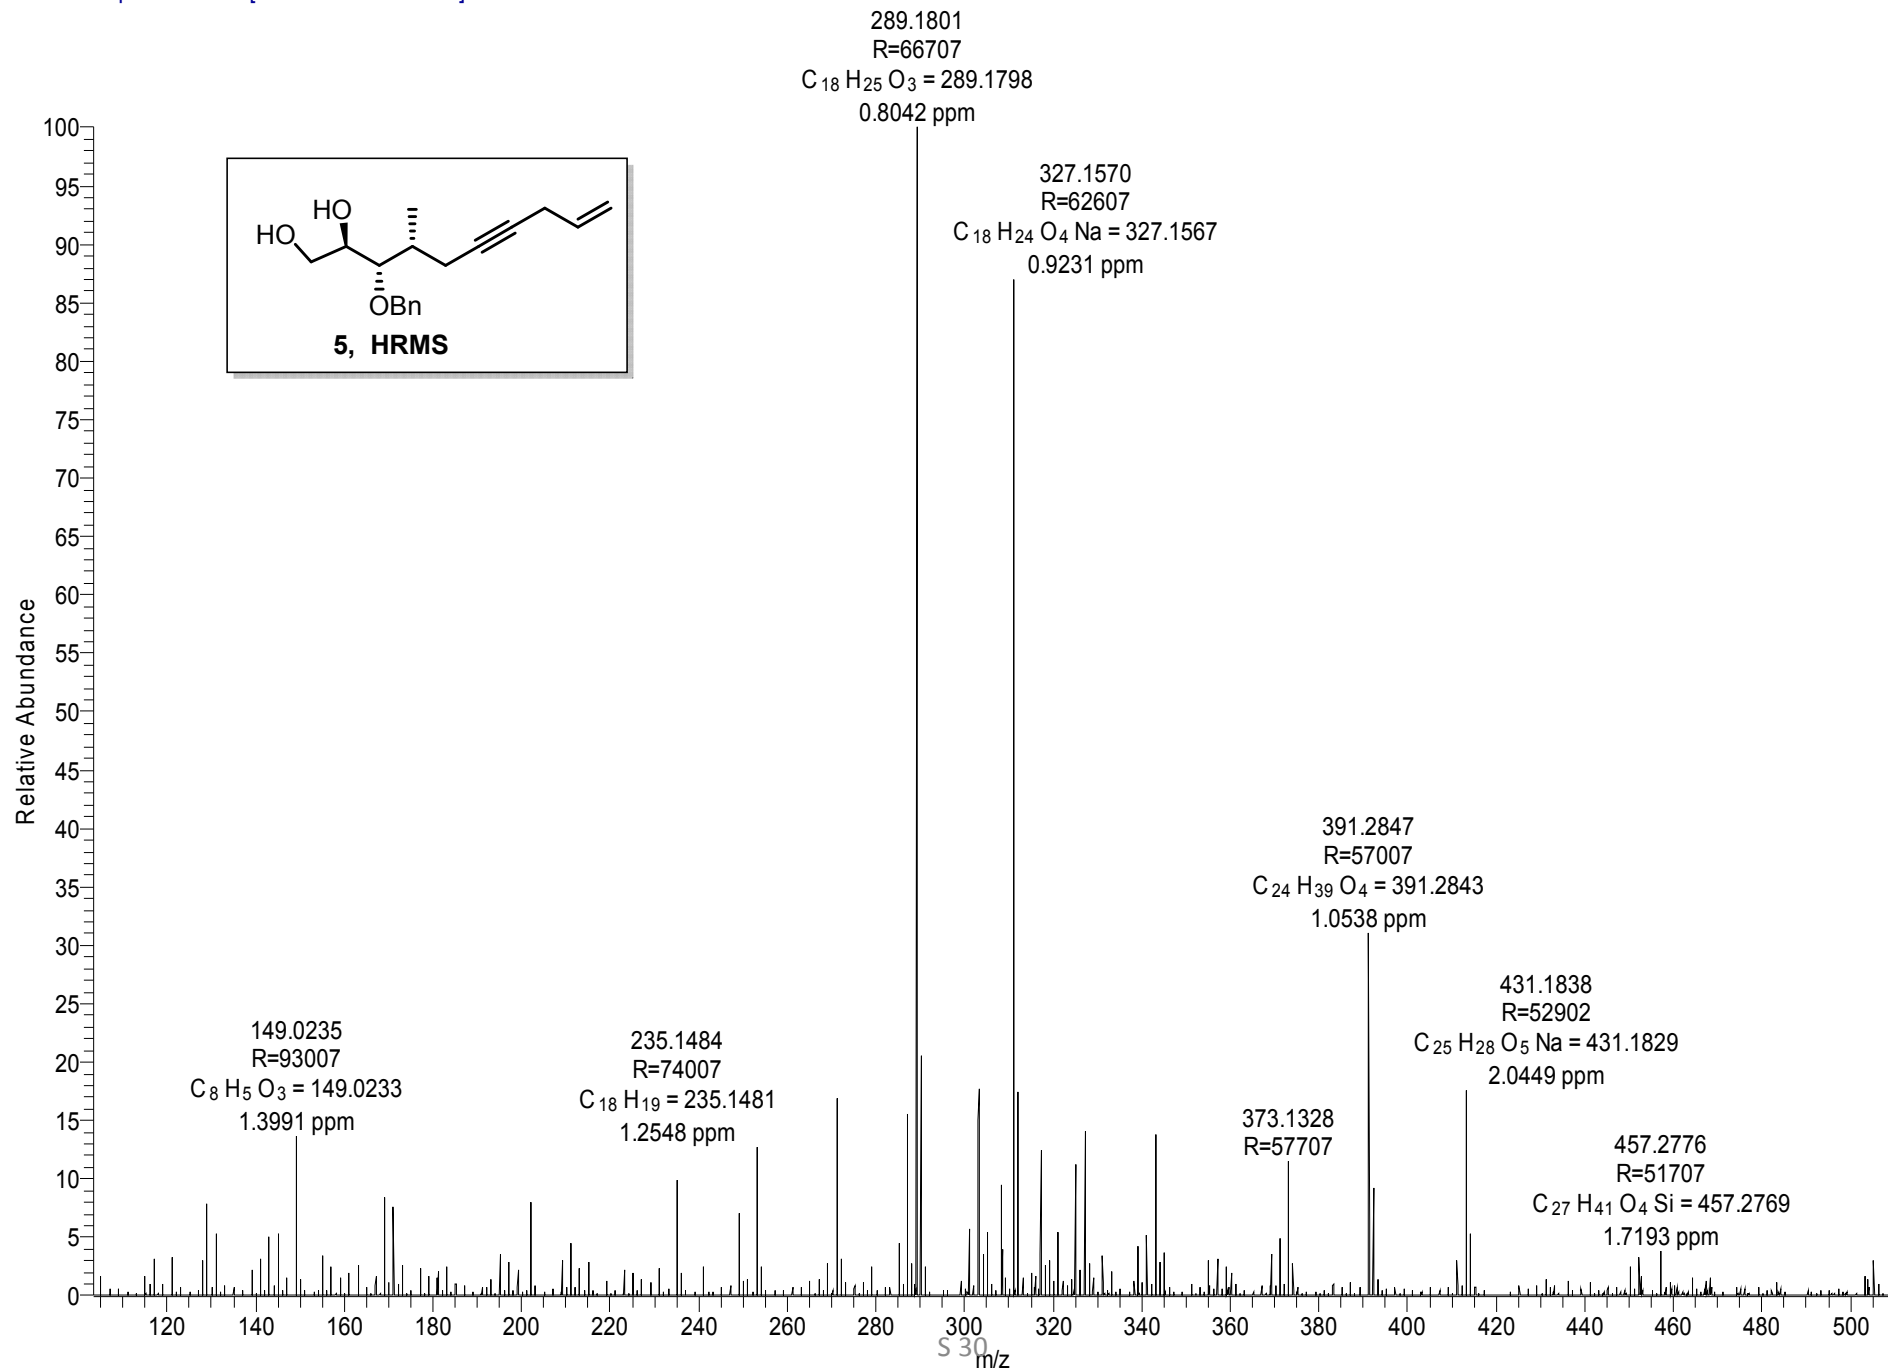

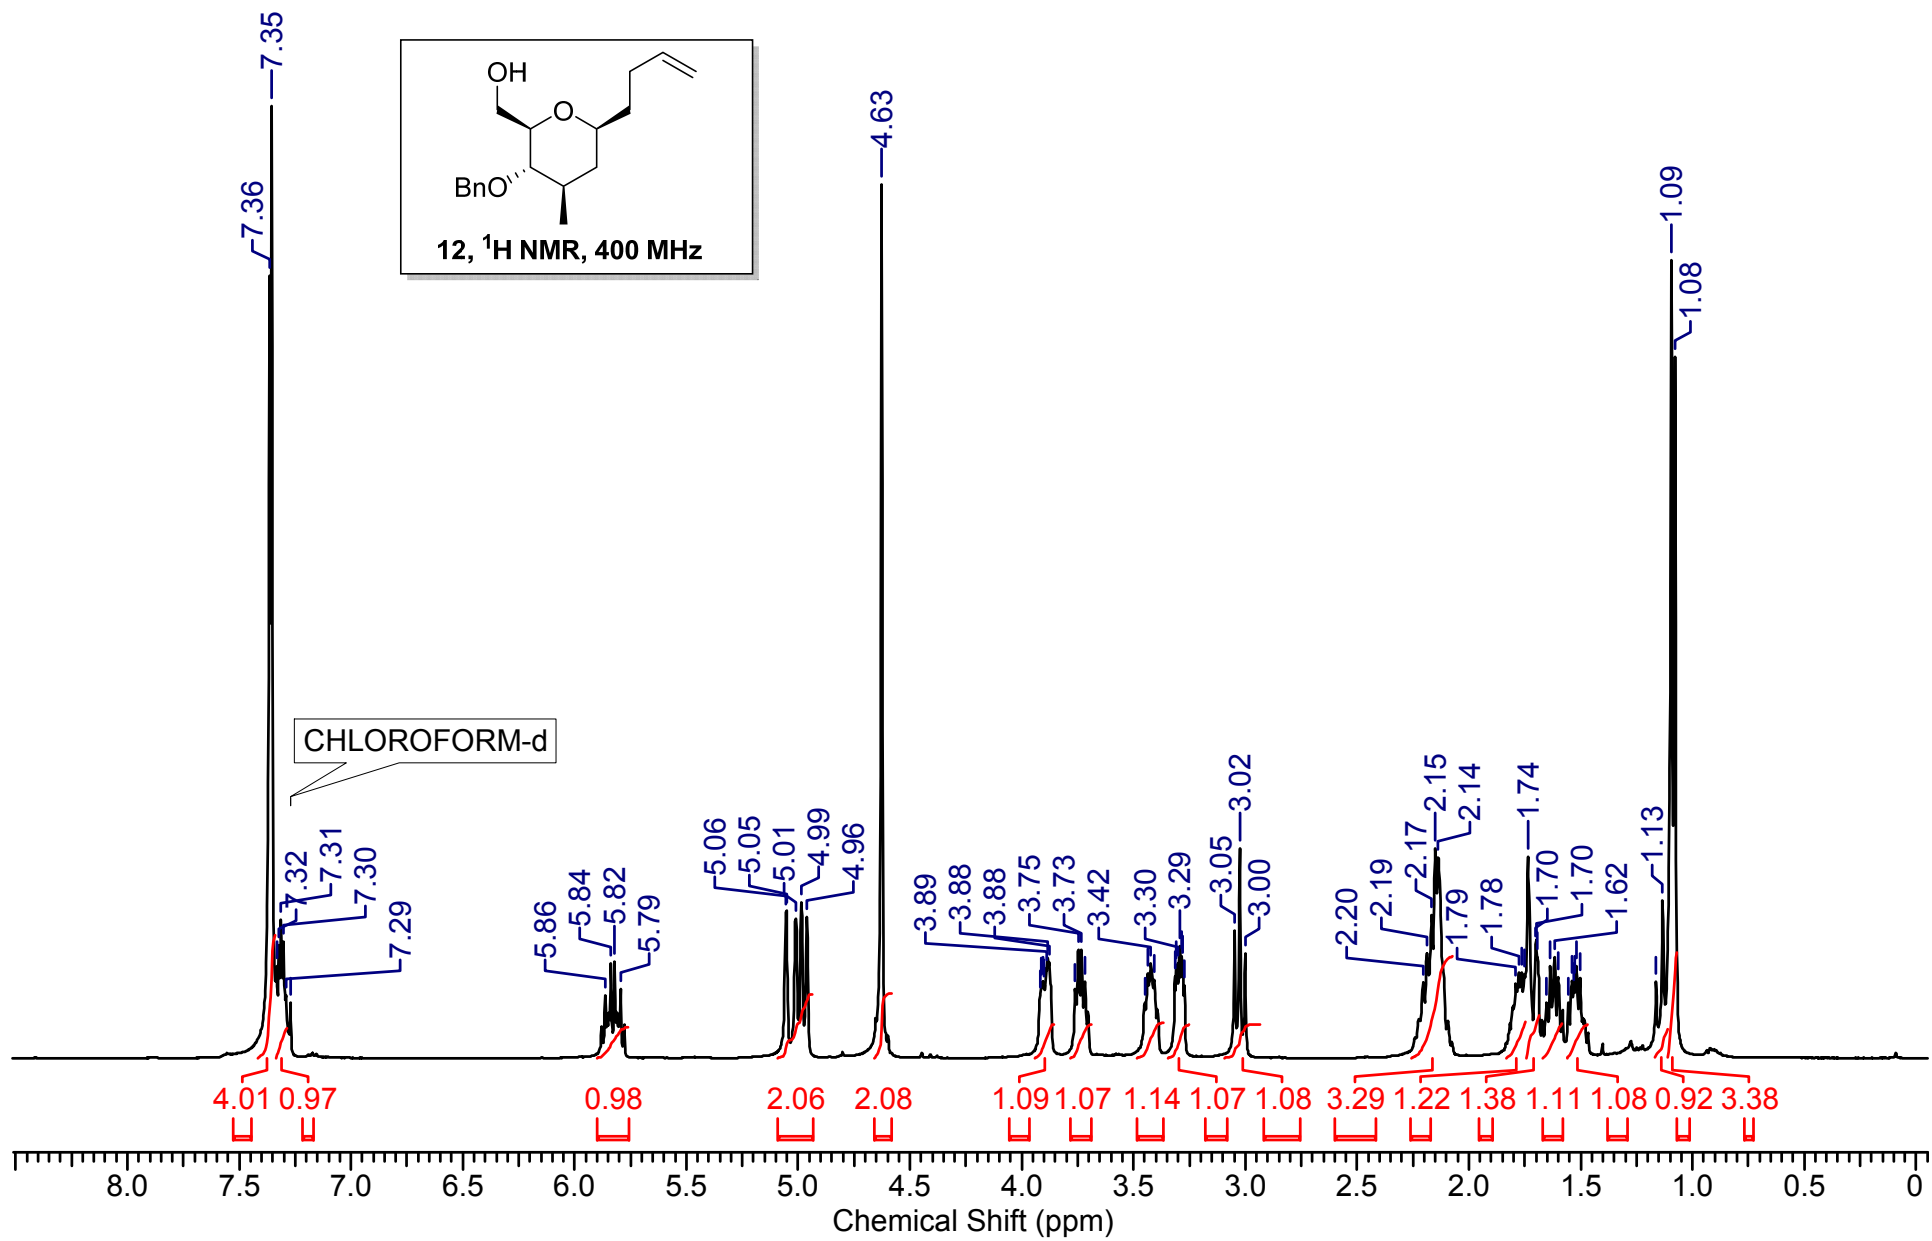

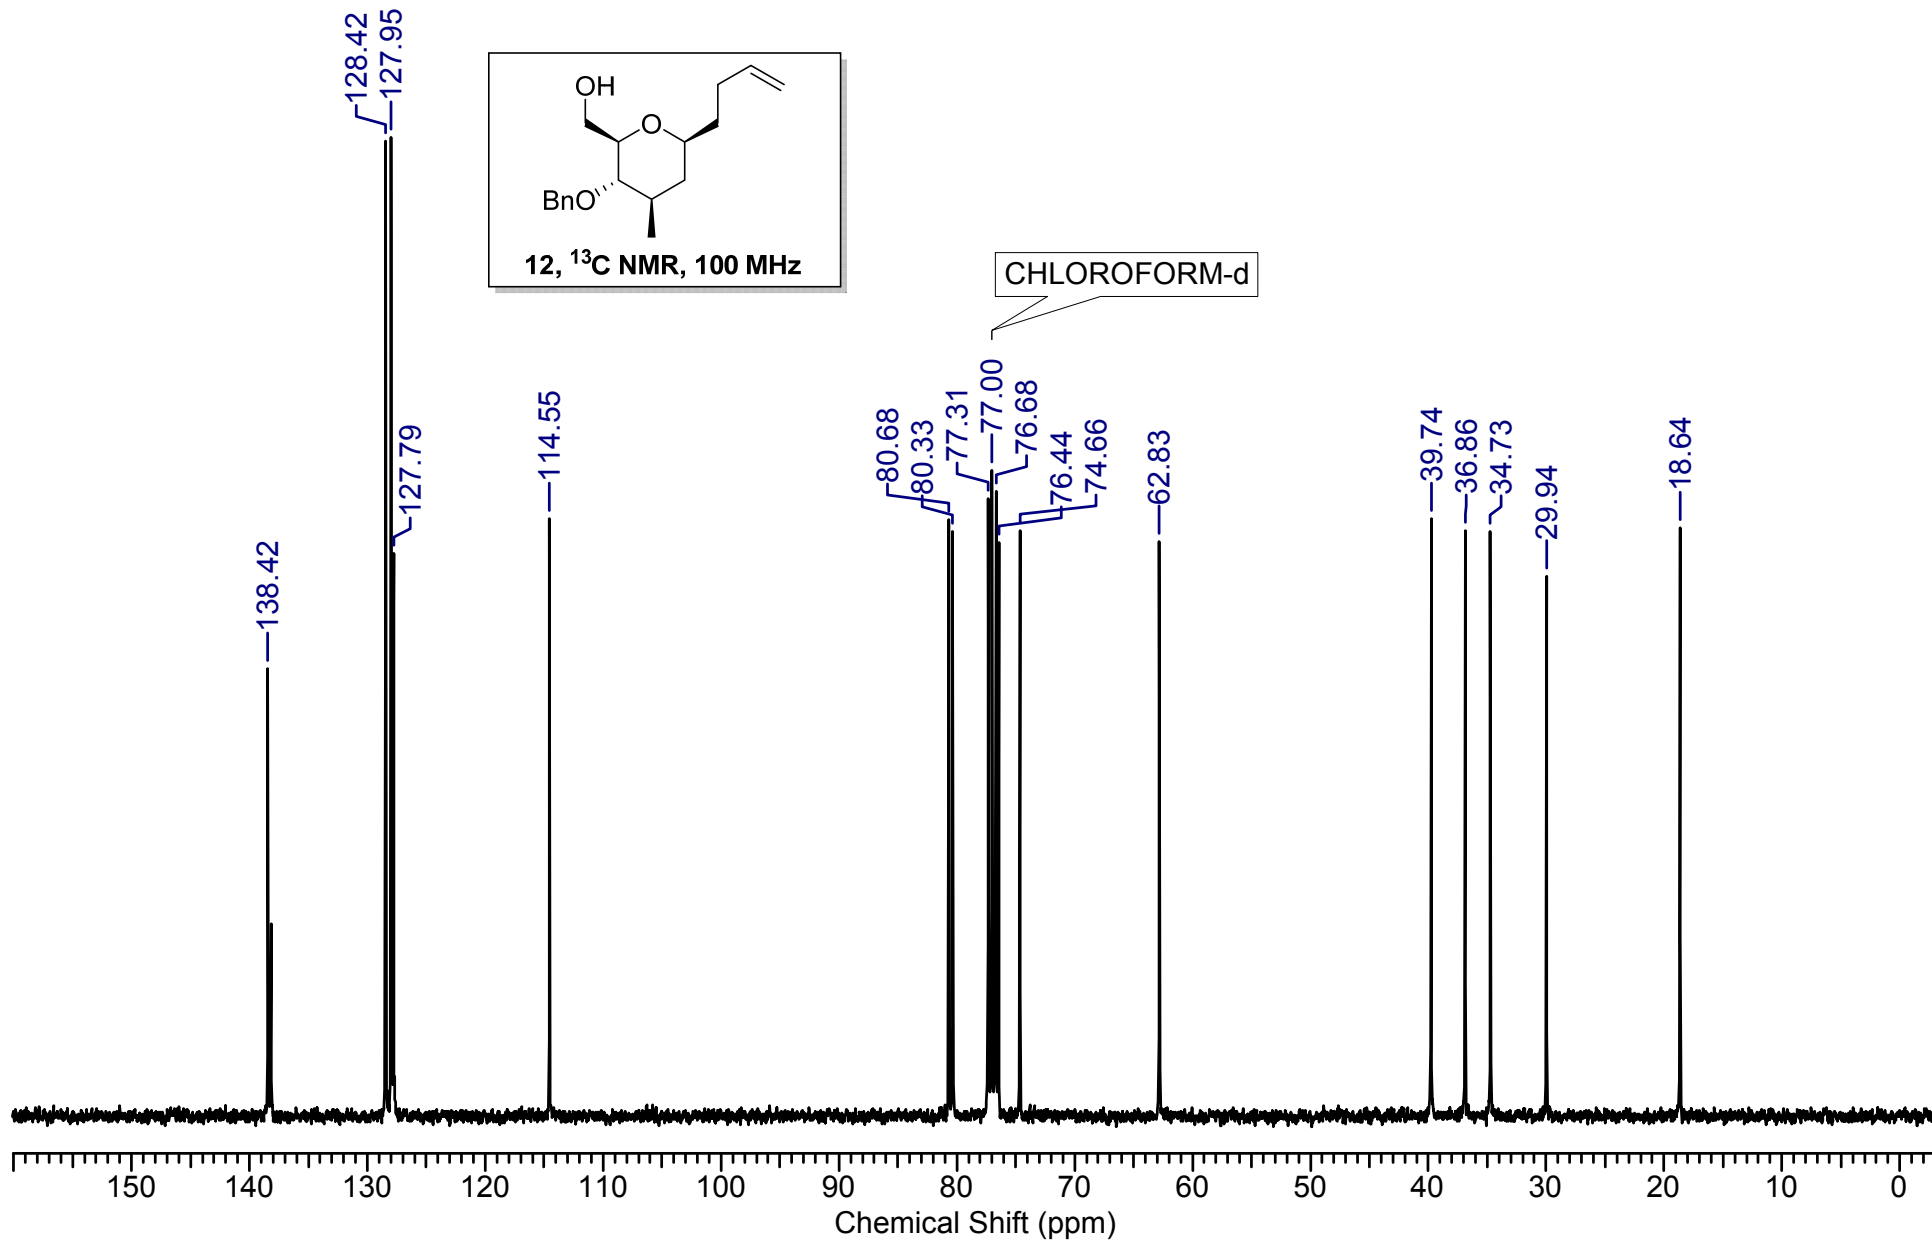



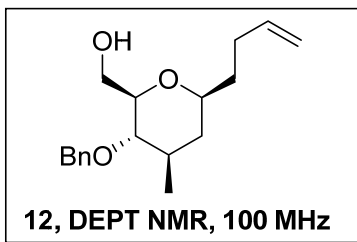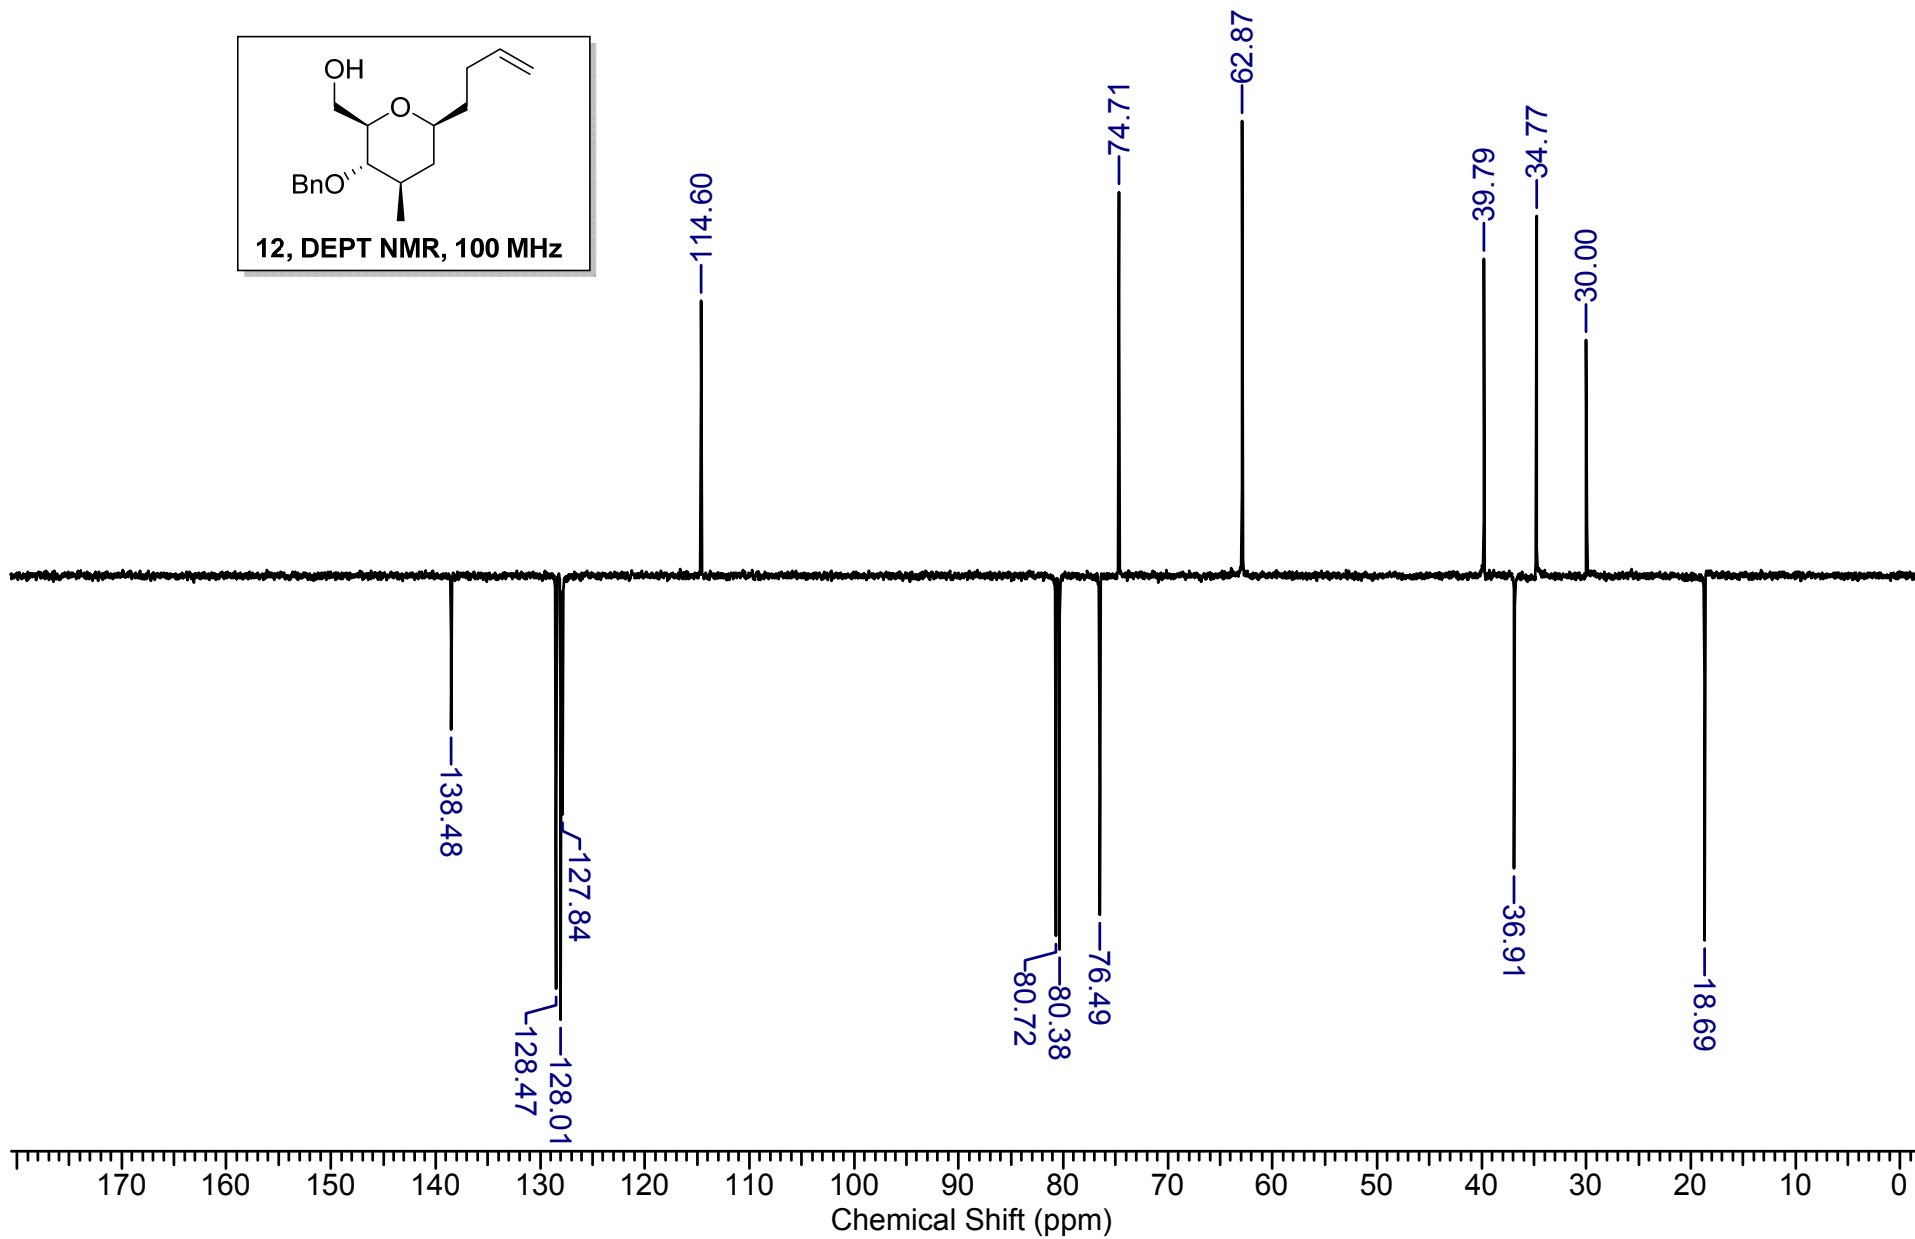

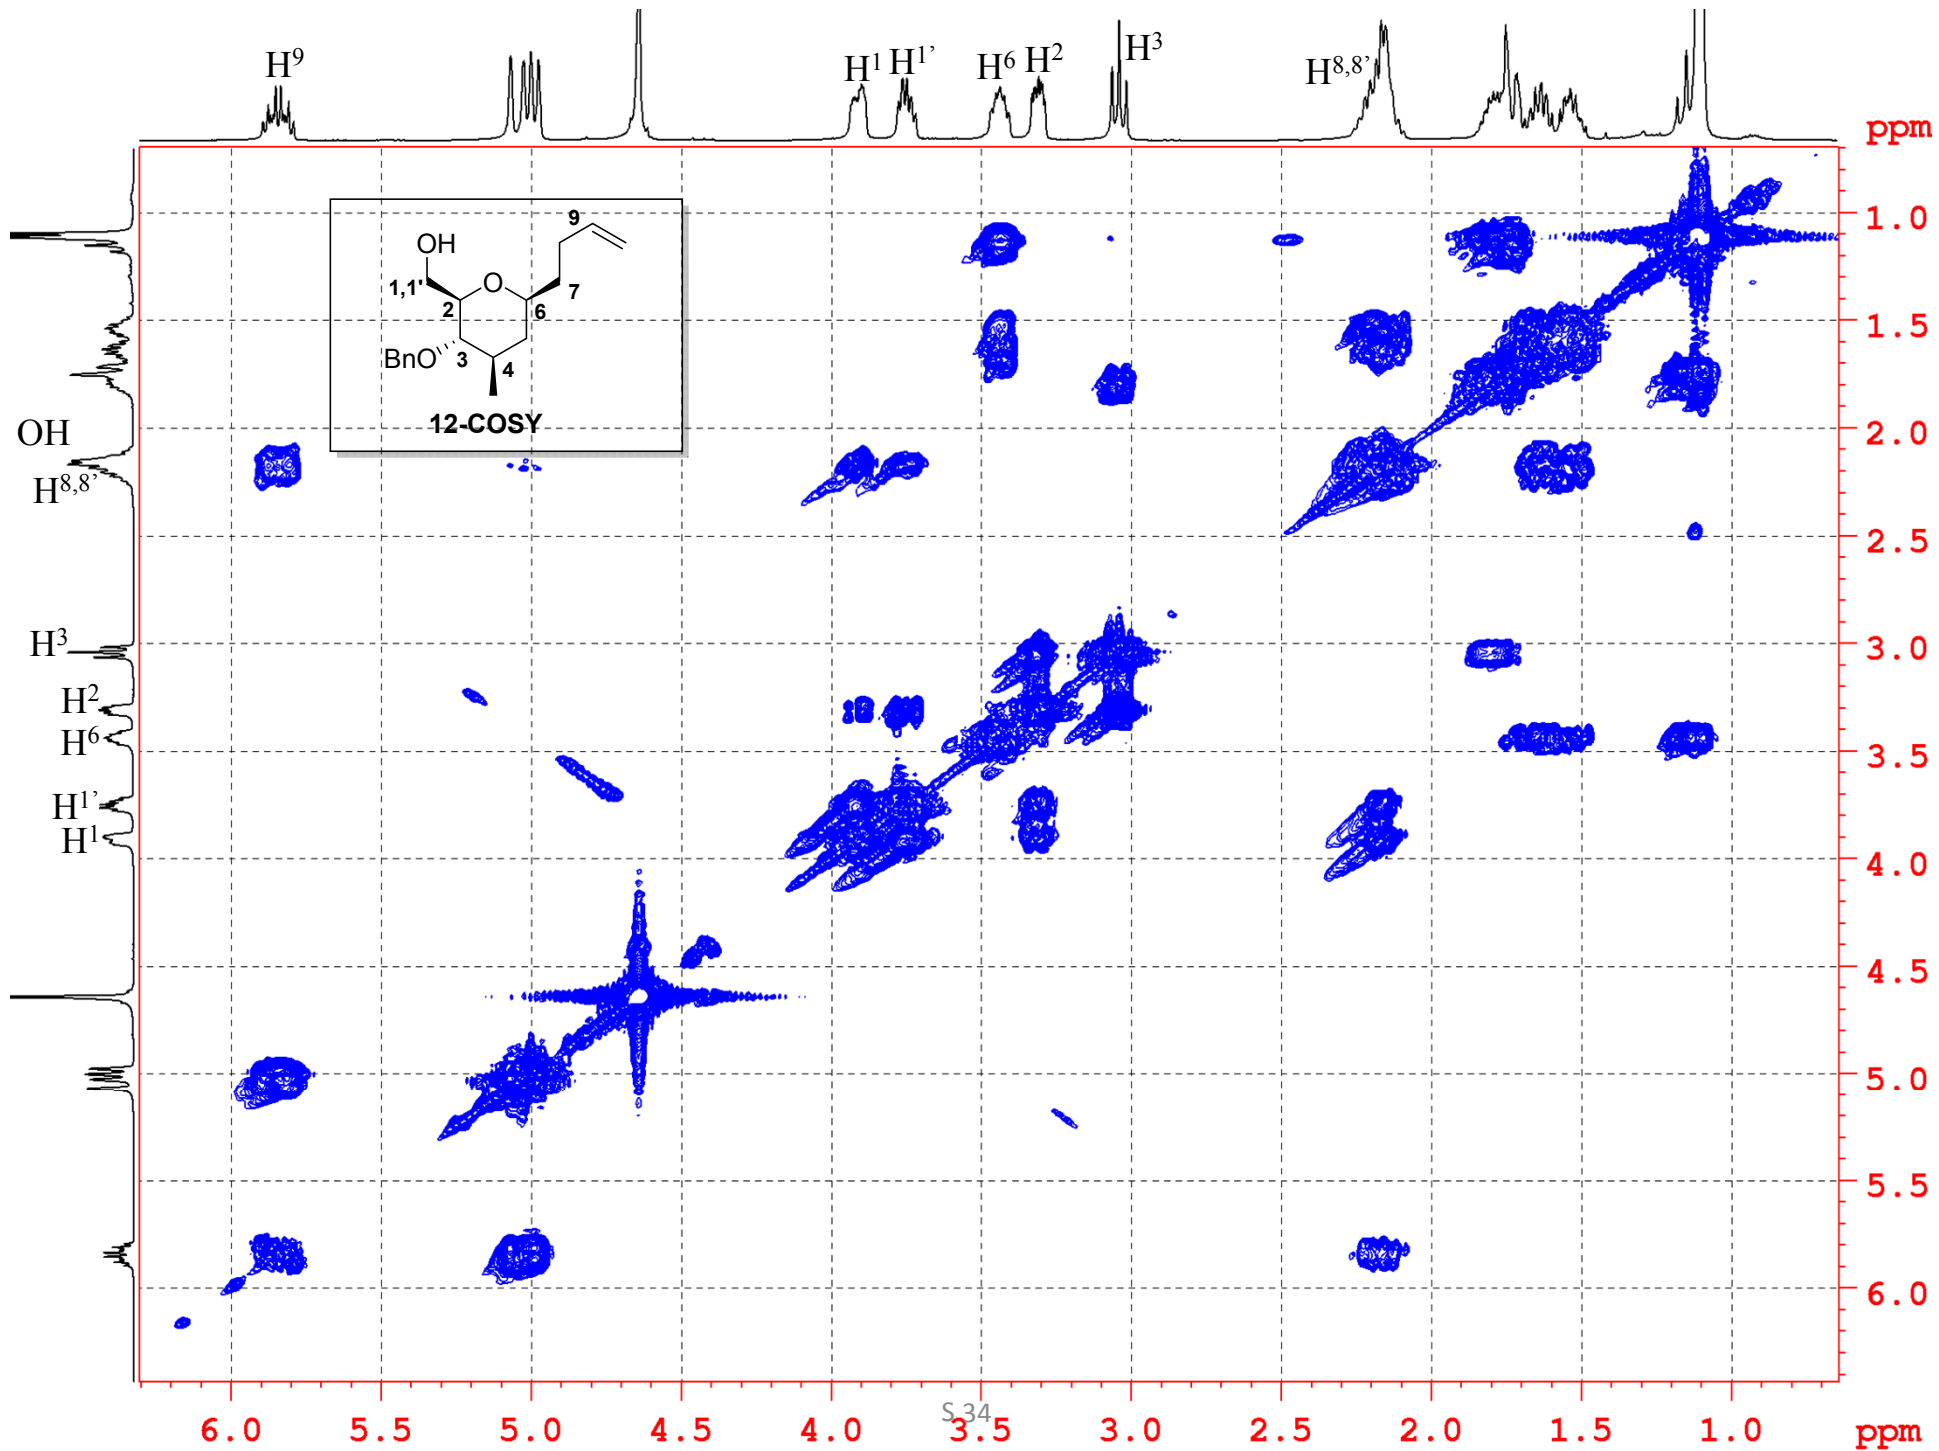

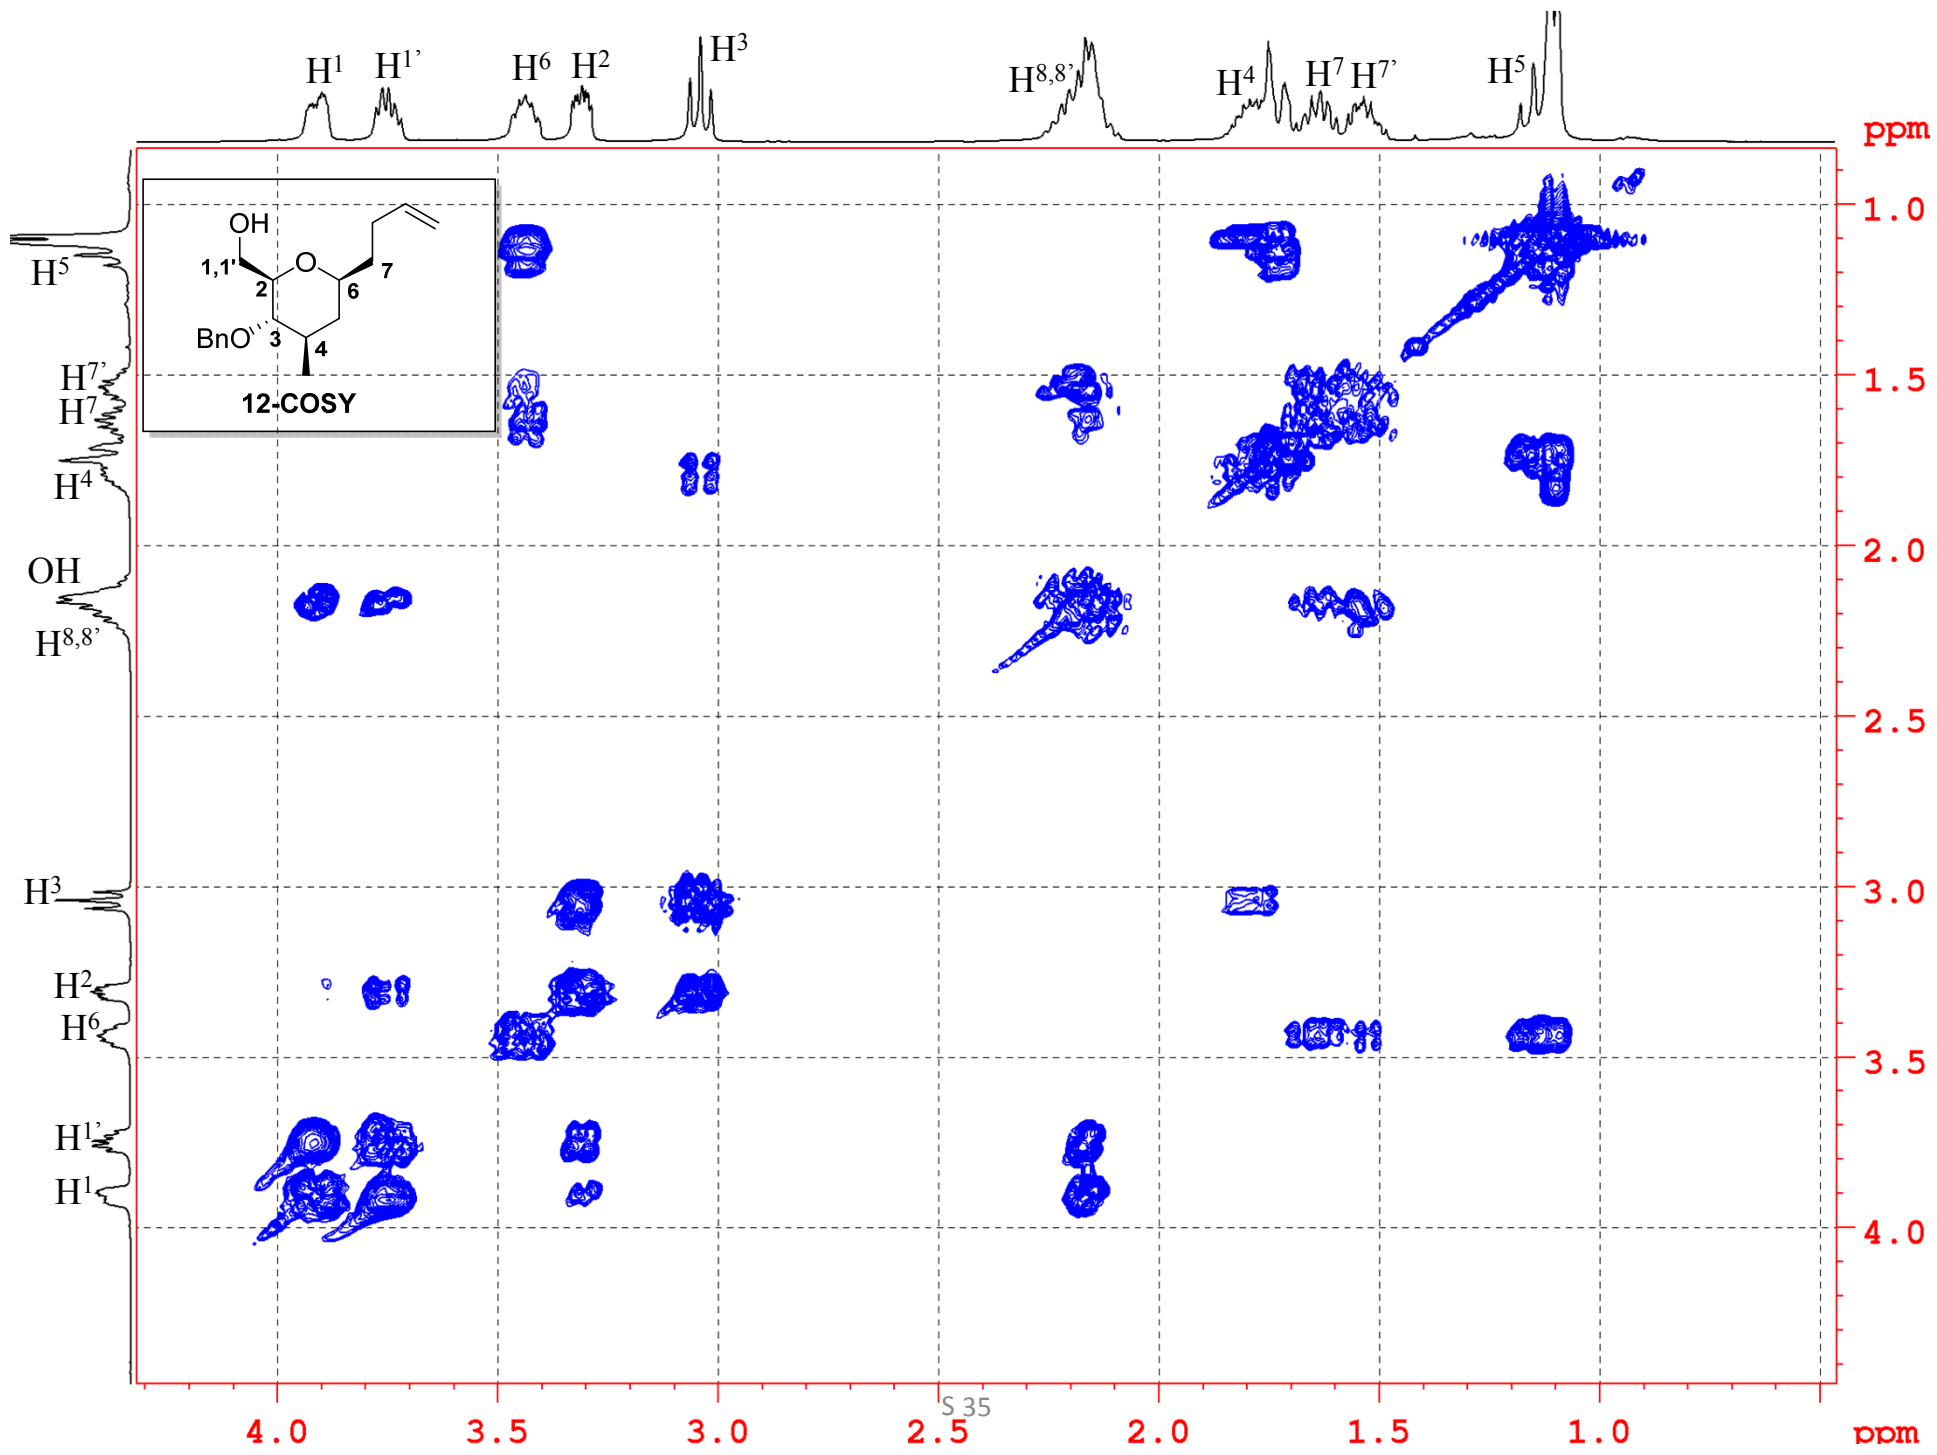

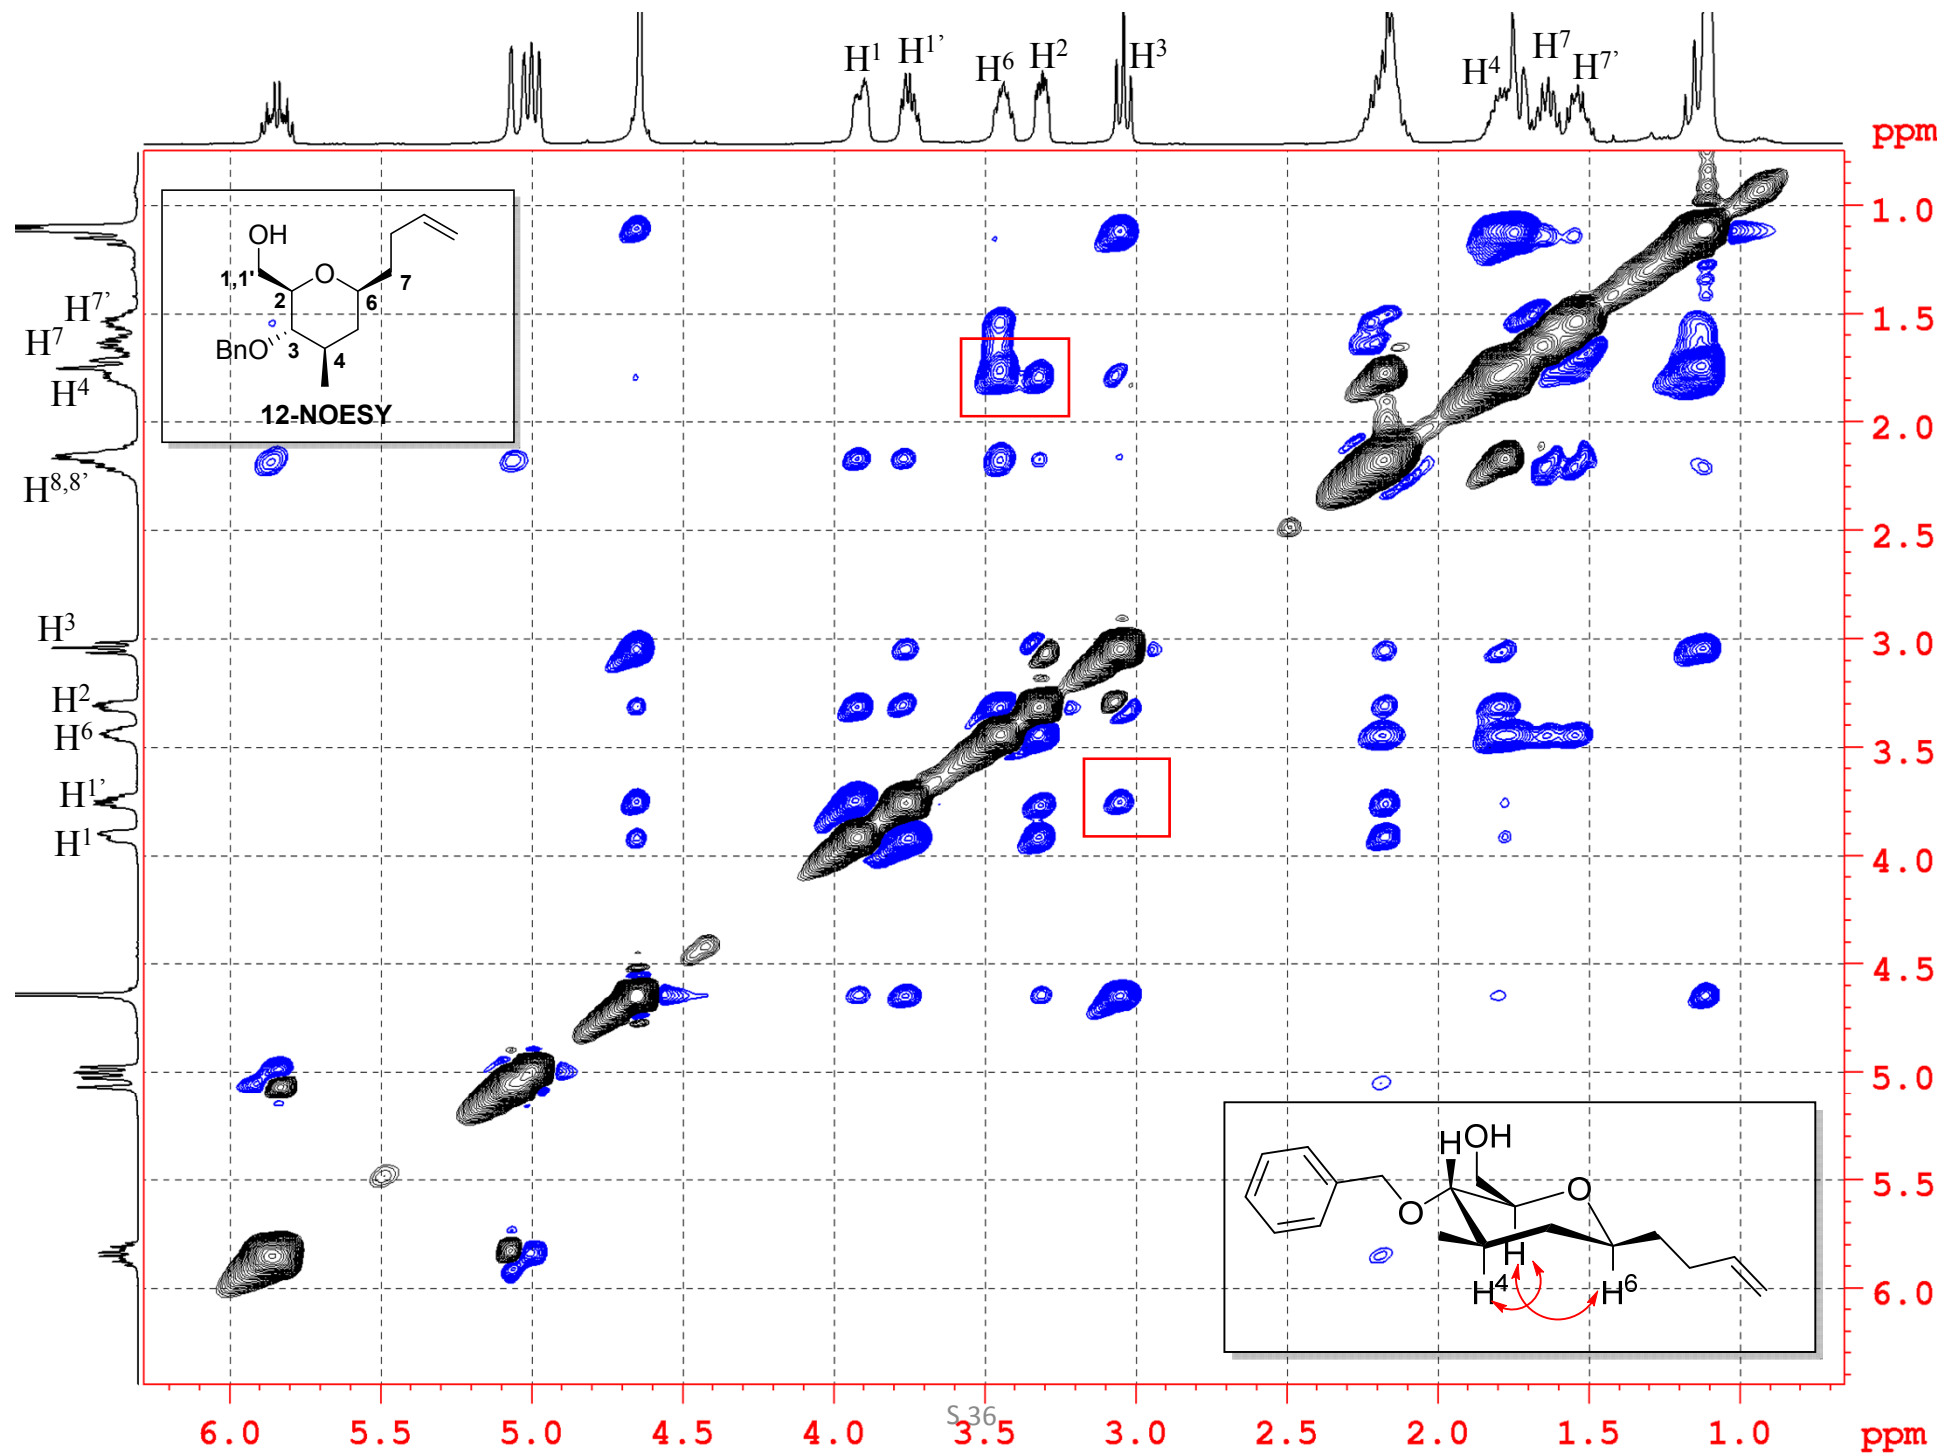

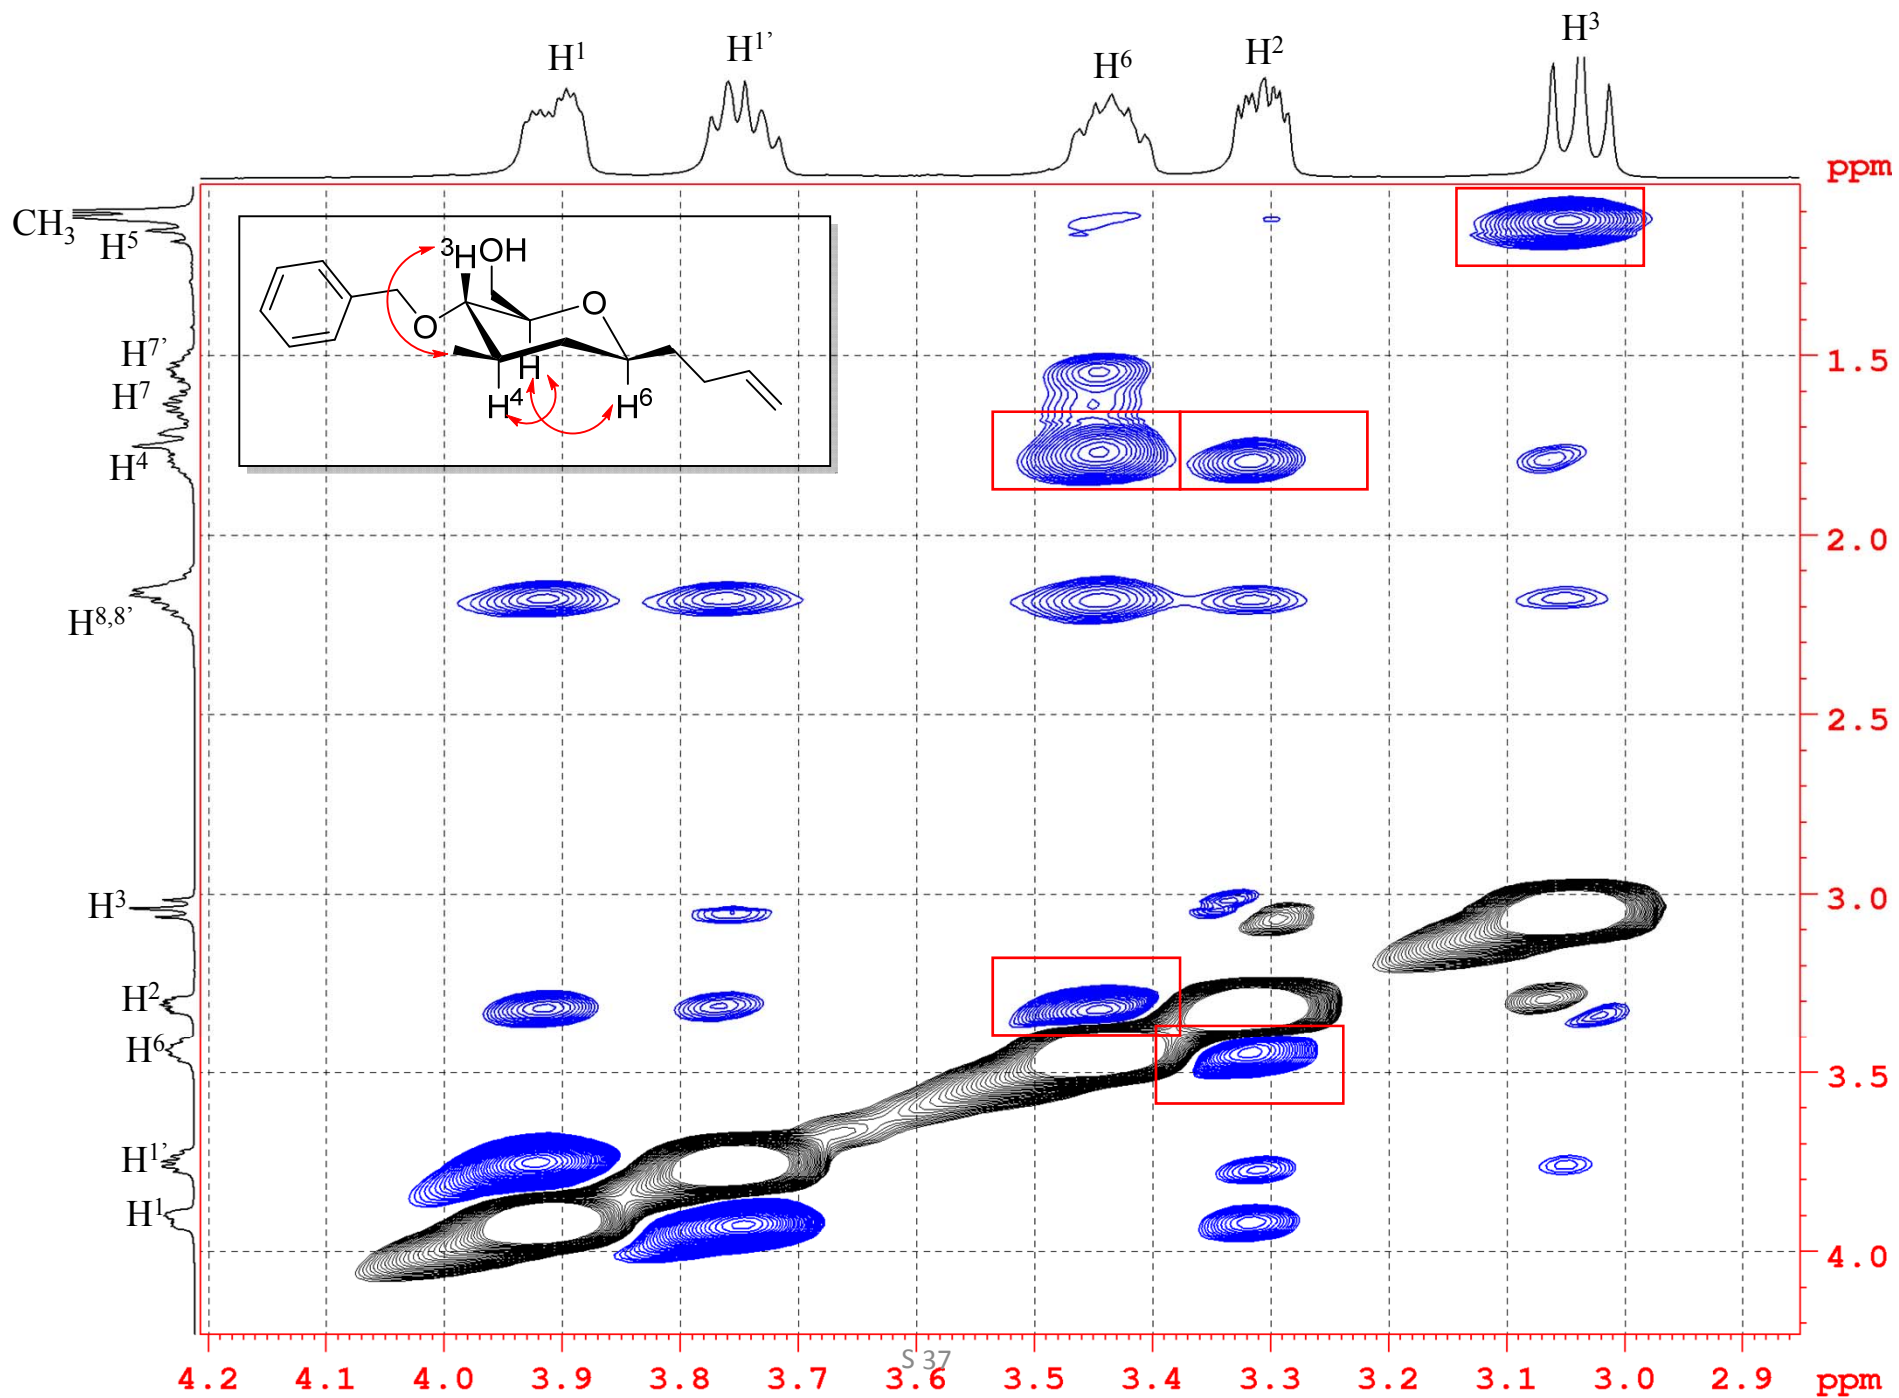

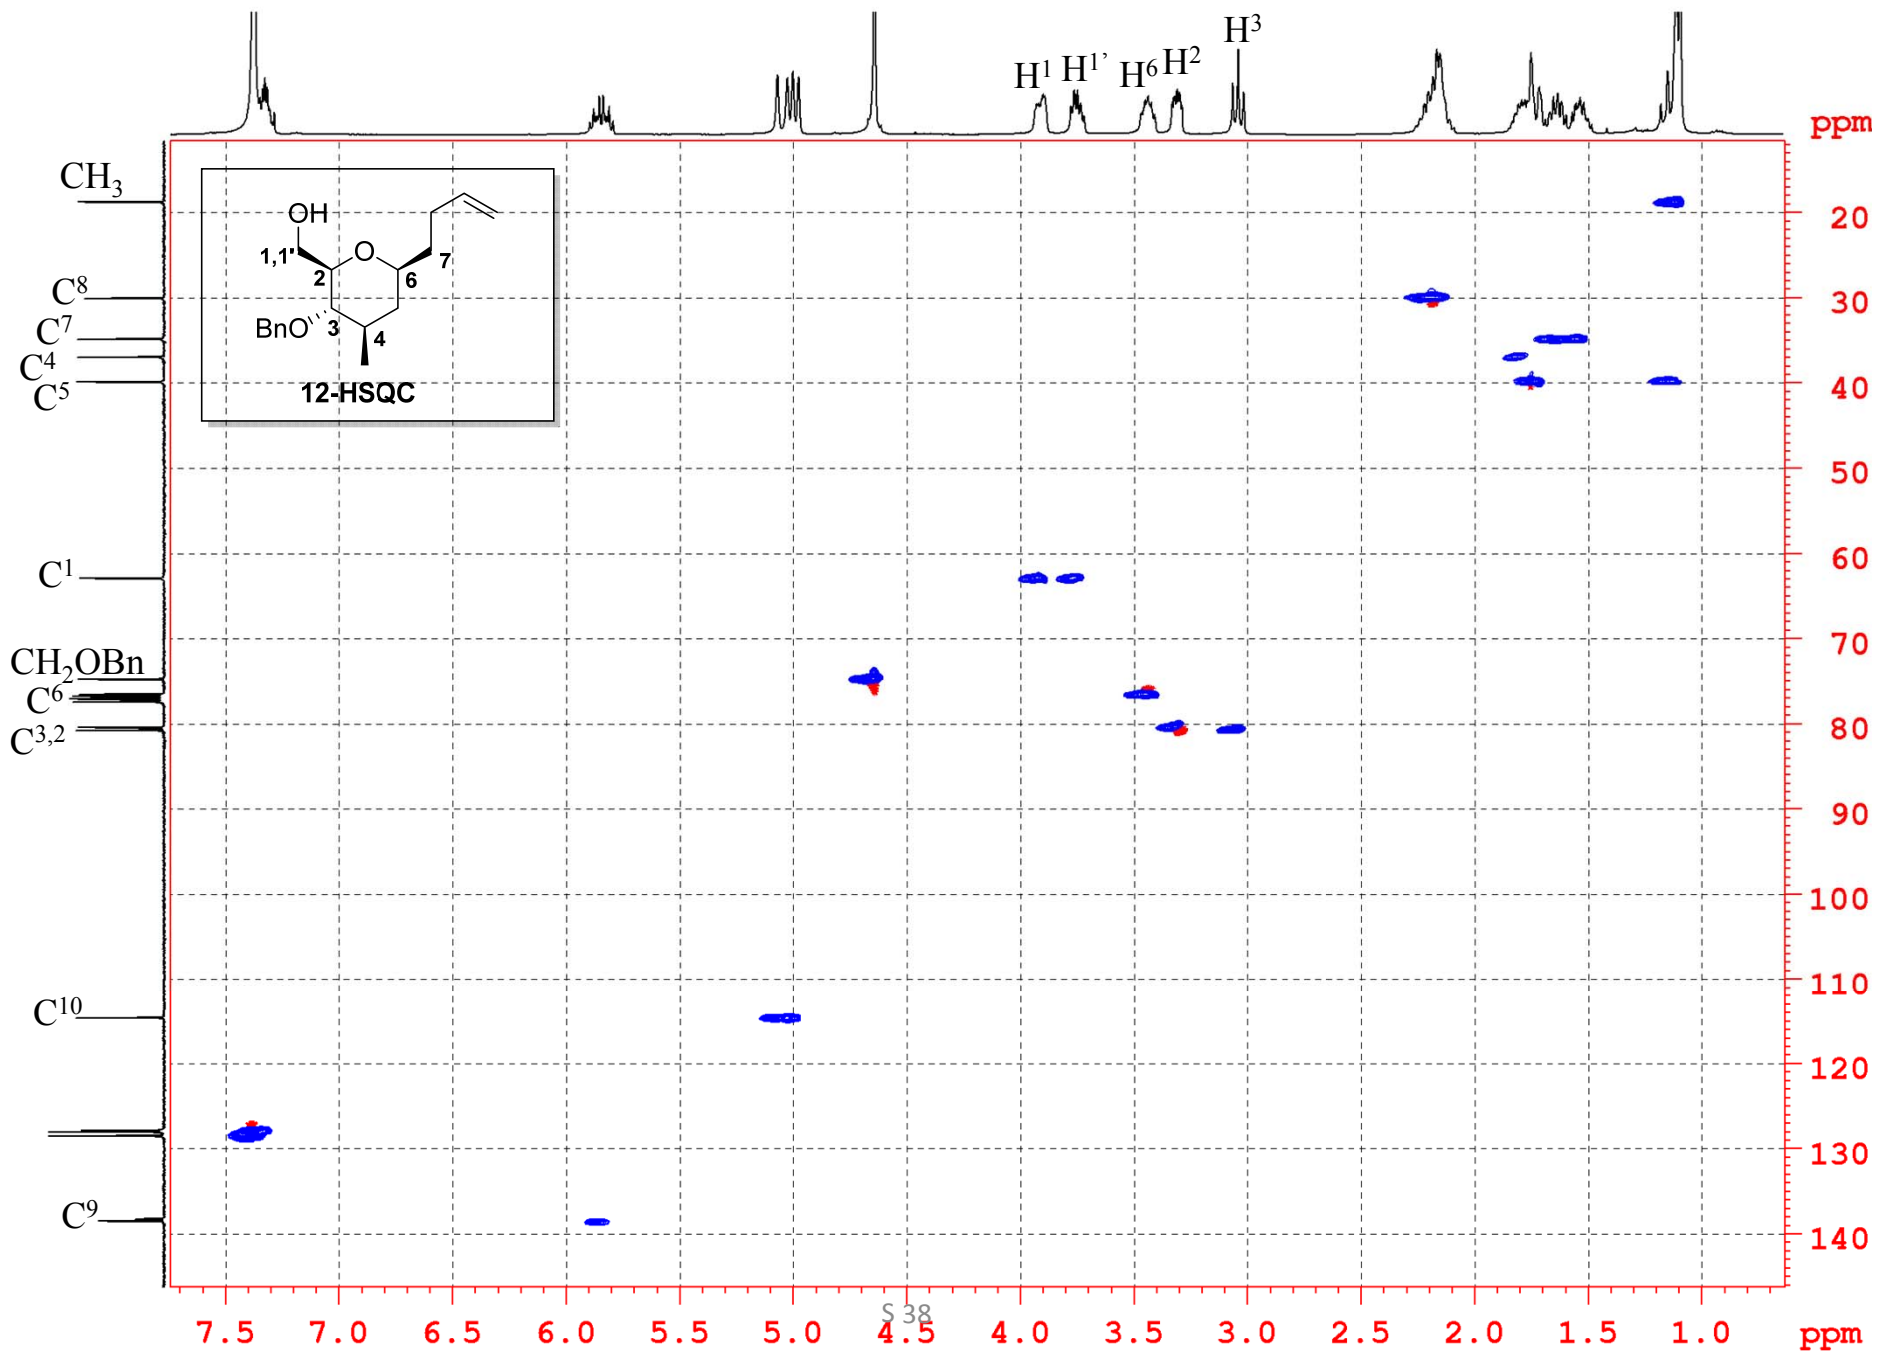

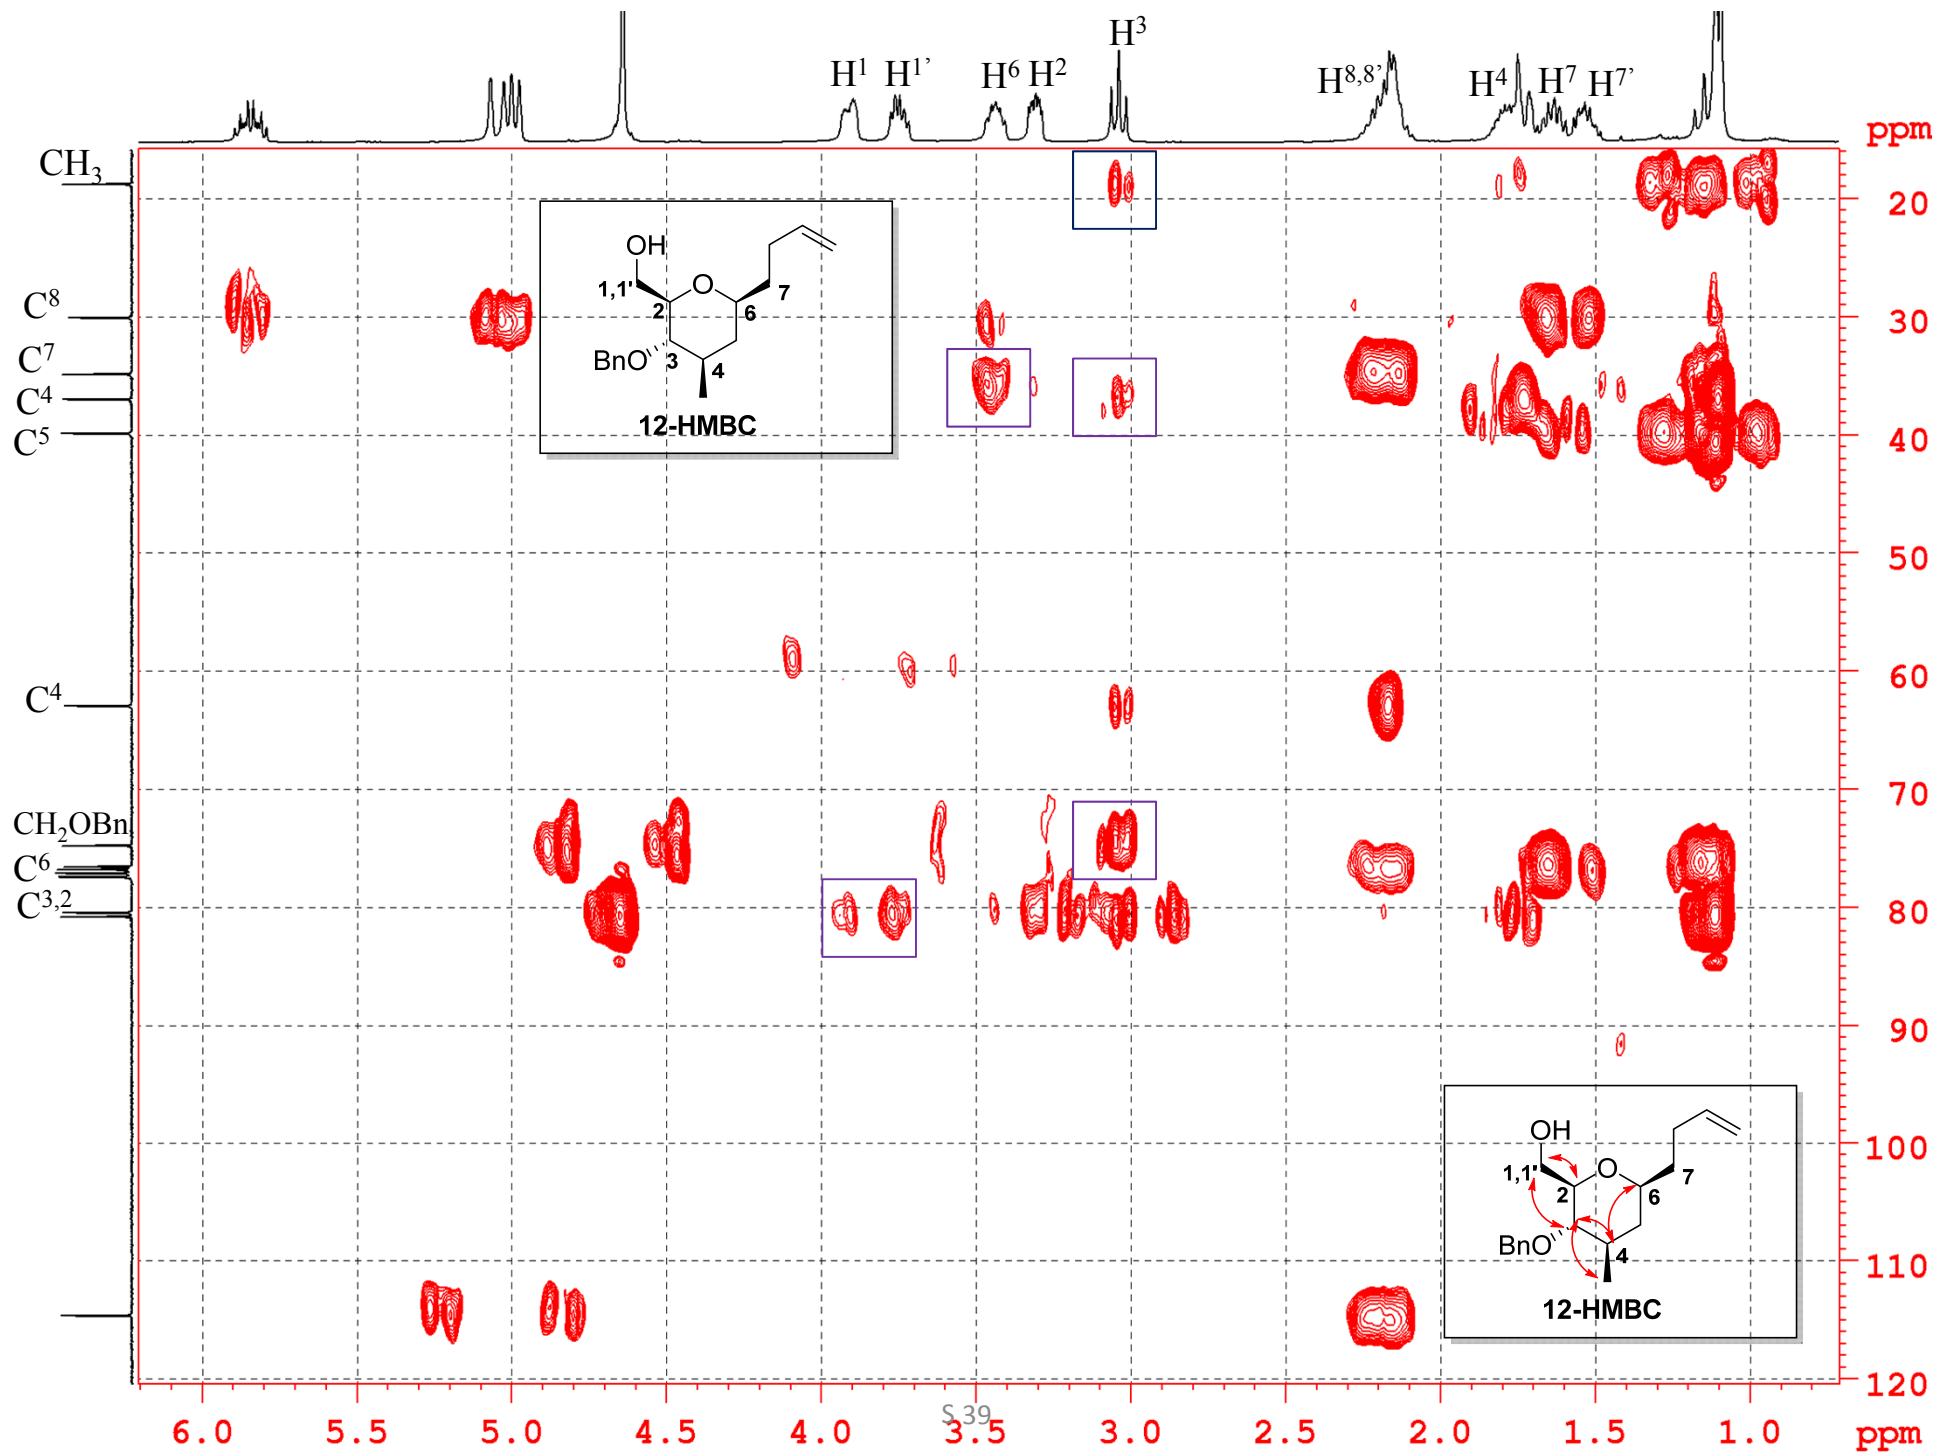

SS-6 #276 RT: 1.23 AV: 1 NL: 1.32E9  
T: FTMS + p ESI Full ms [133.4000-2000.0000]

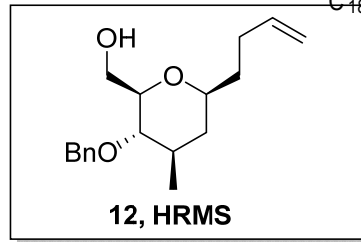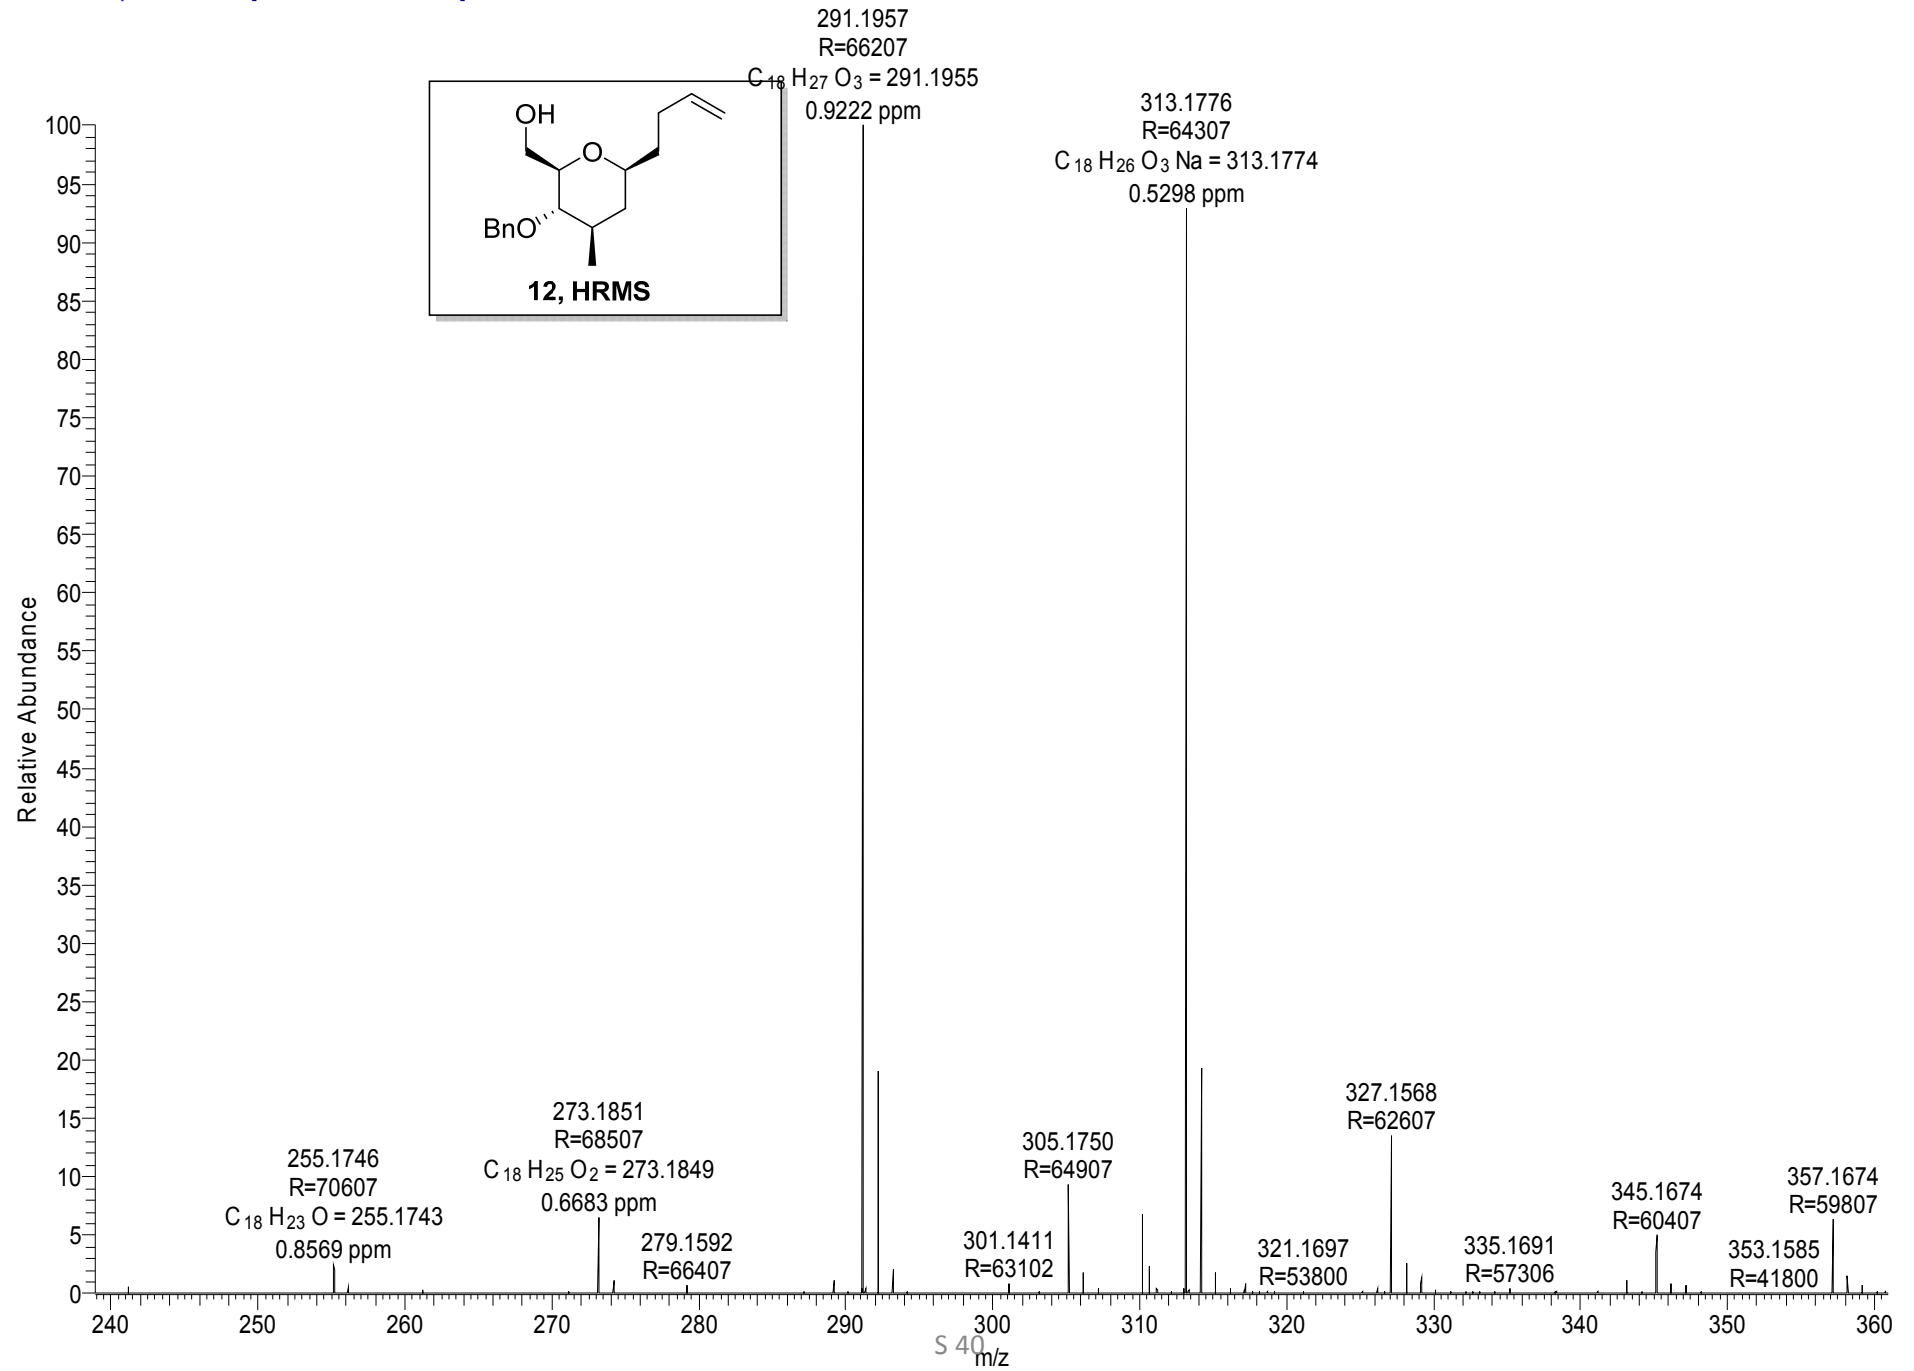



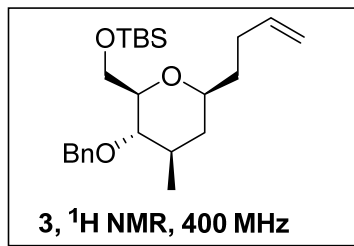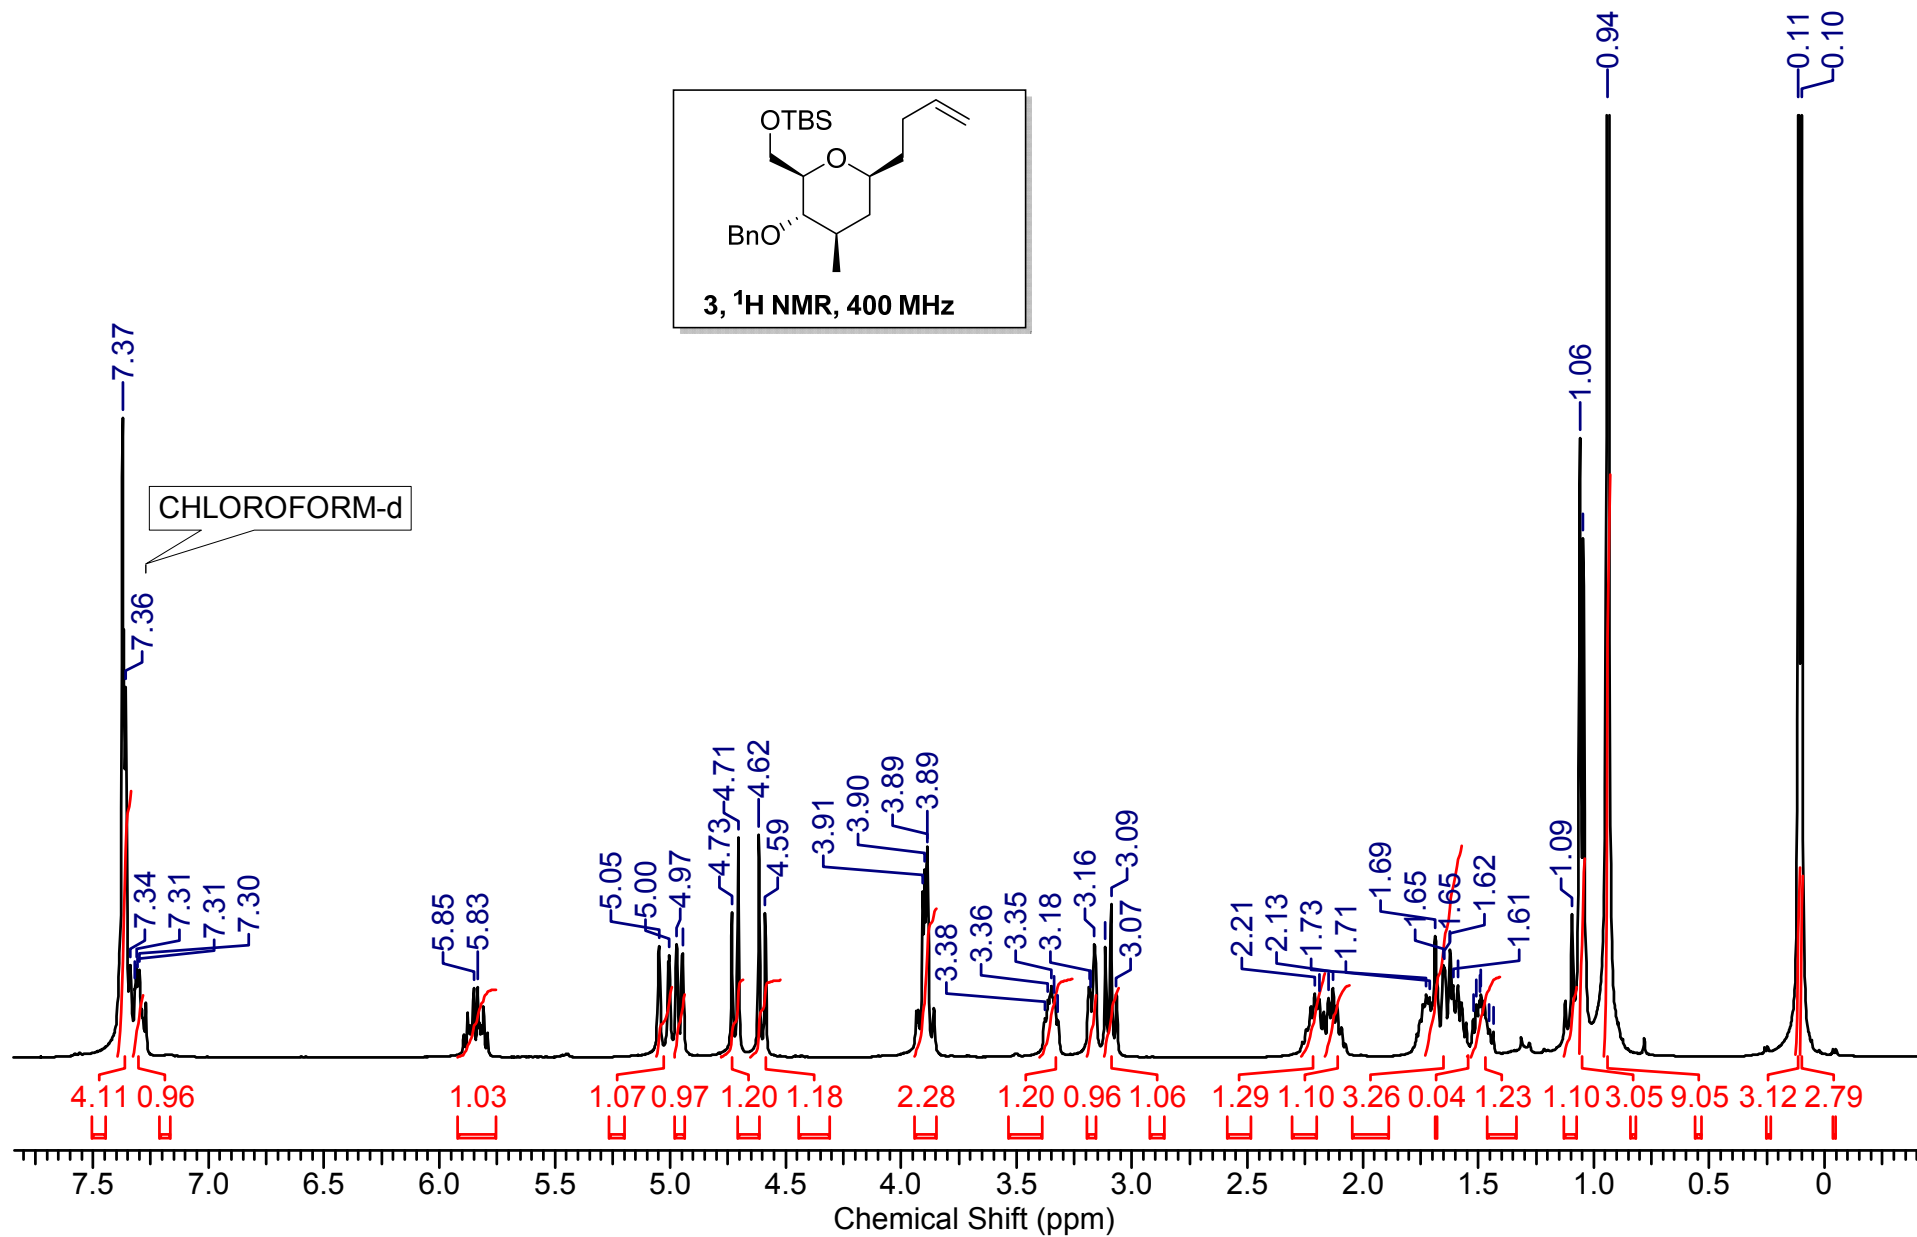

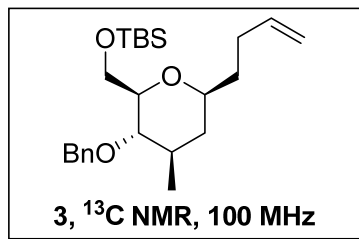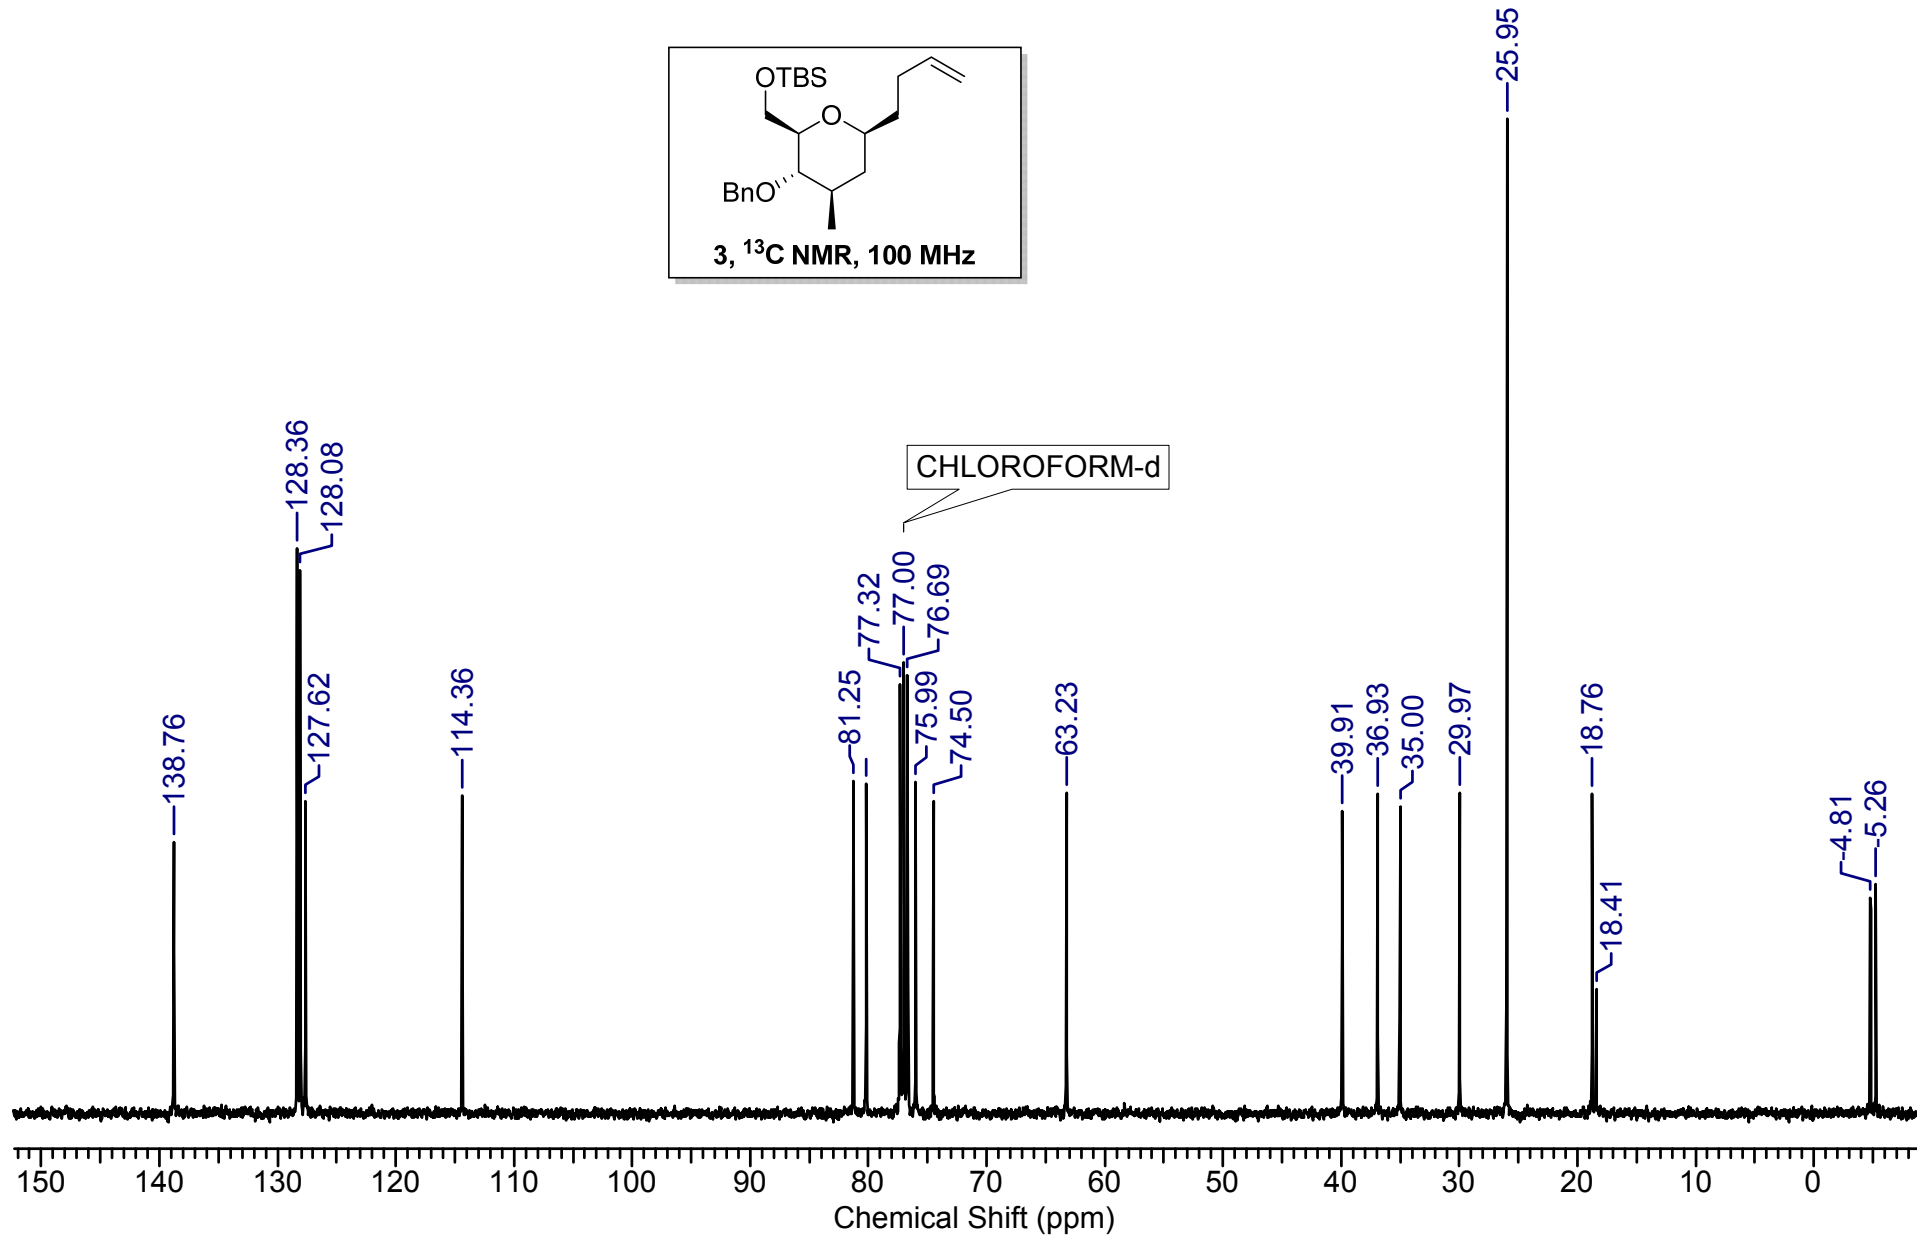

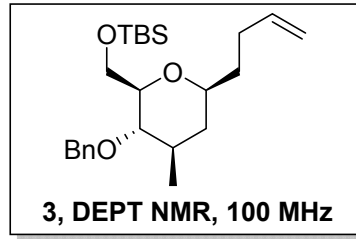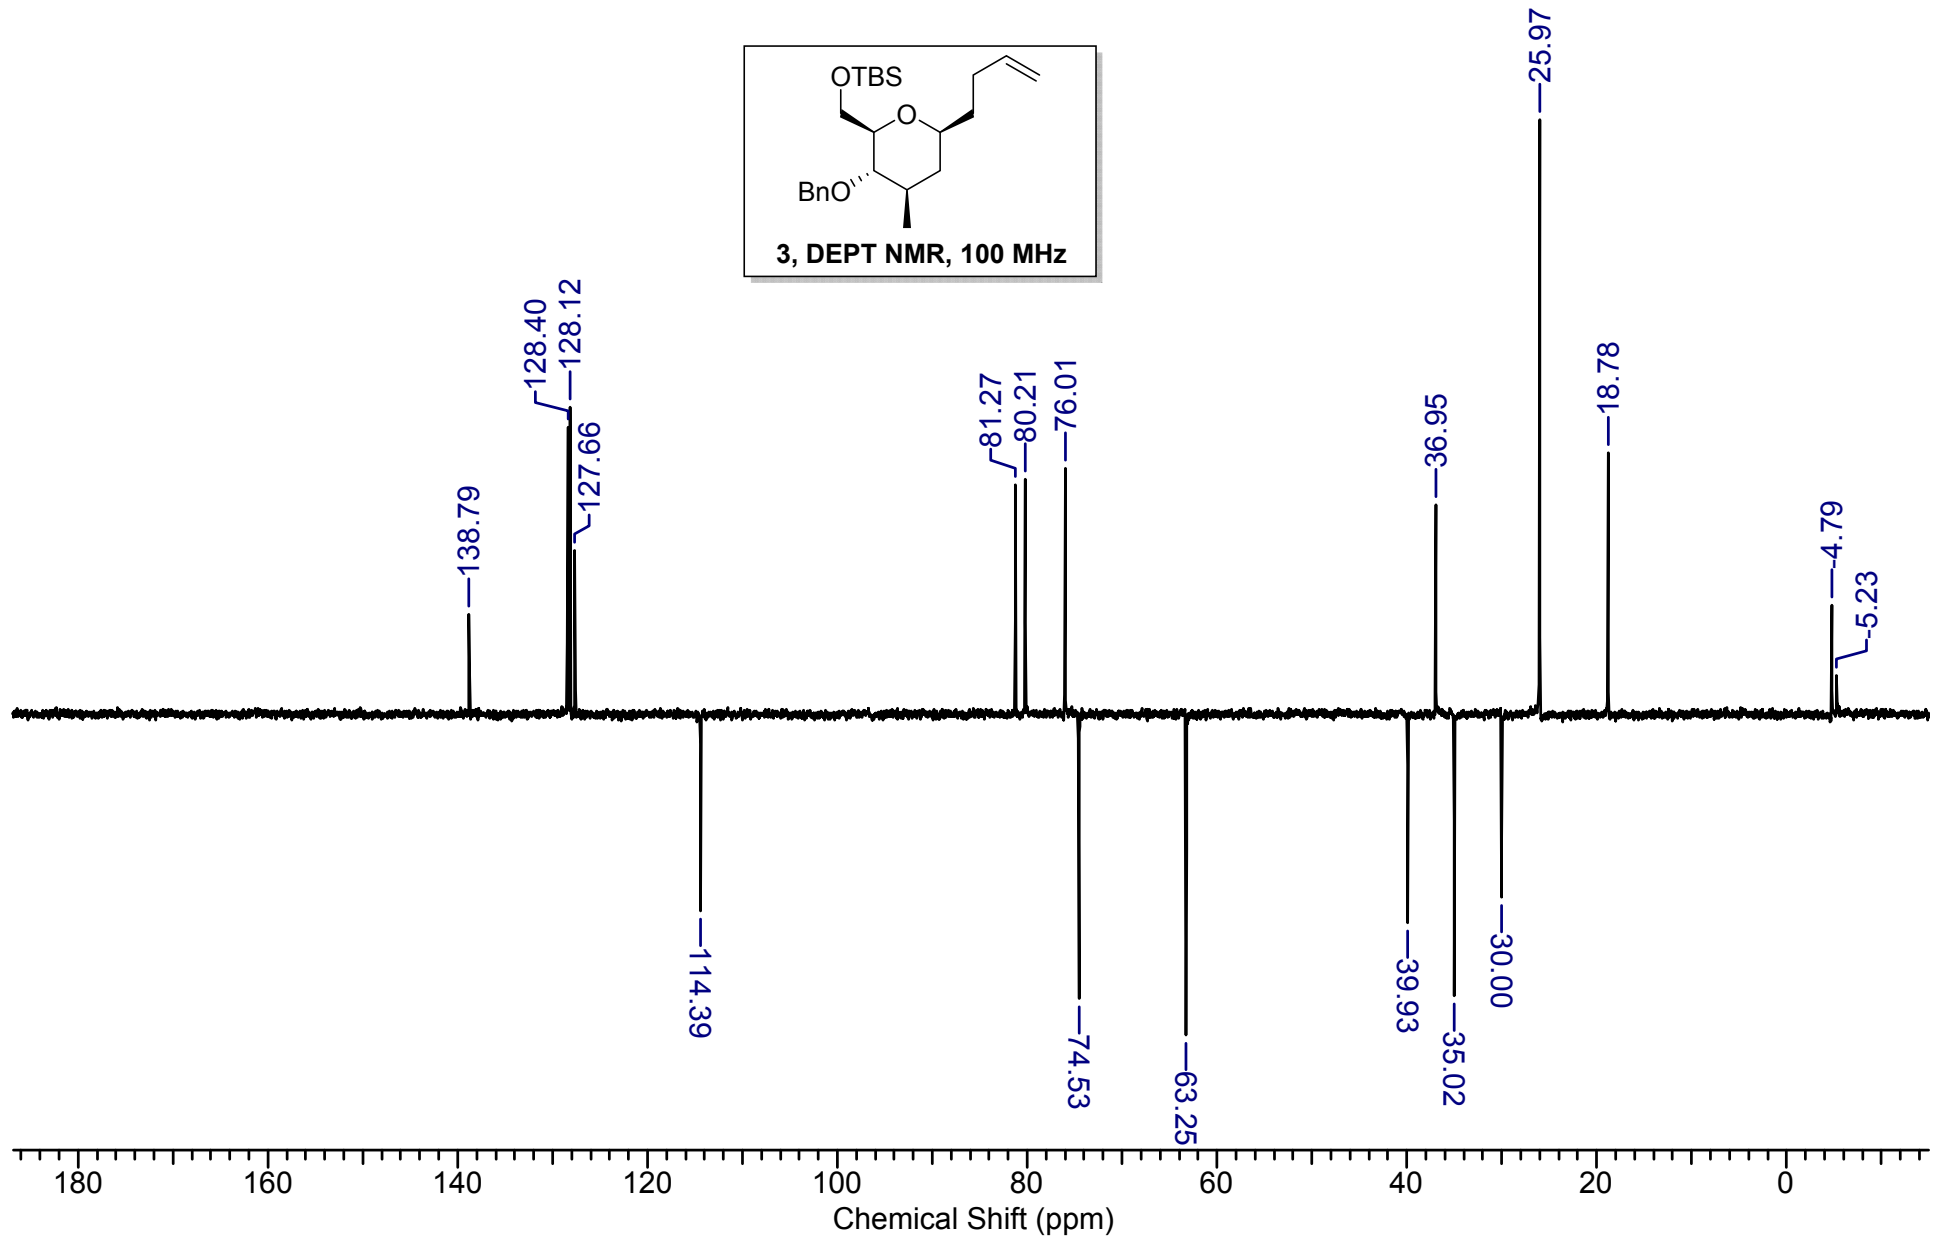

SS-7 #637 RT: 2.84 AV: 1 NL: 1.71E9  
T: FTMS + p ESI Full ms [133.4000-2000.0000]

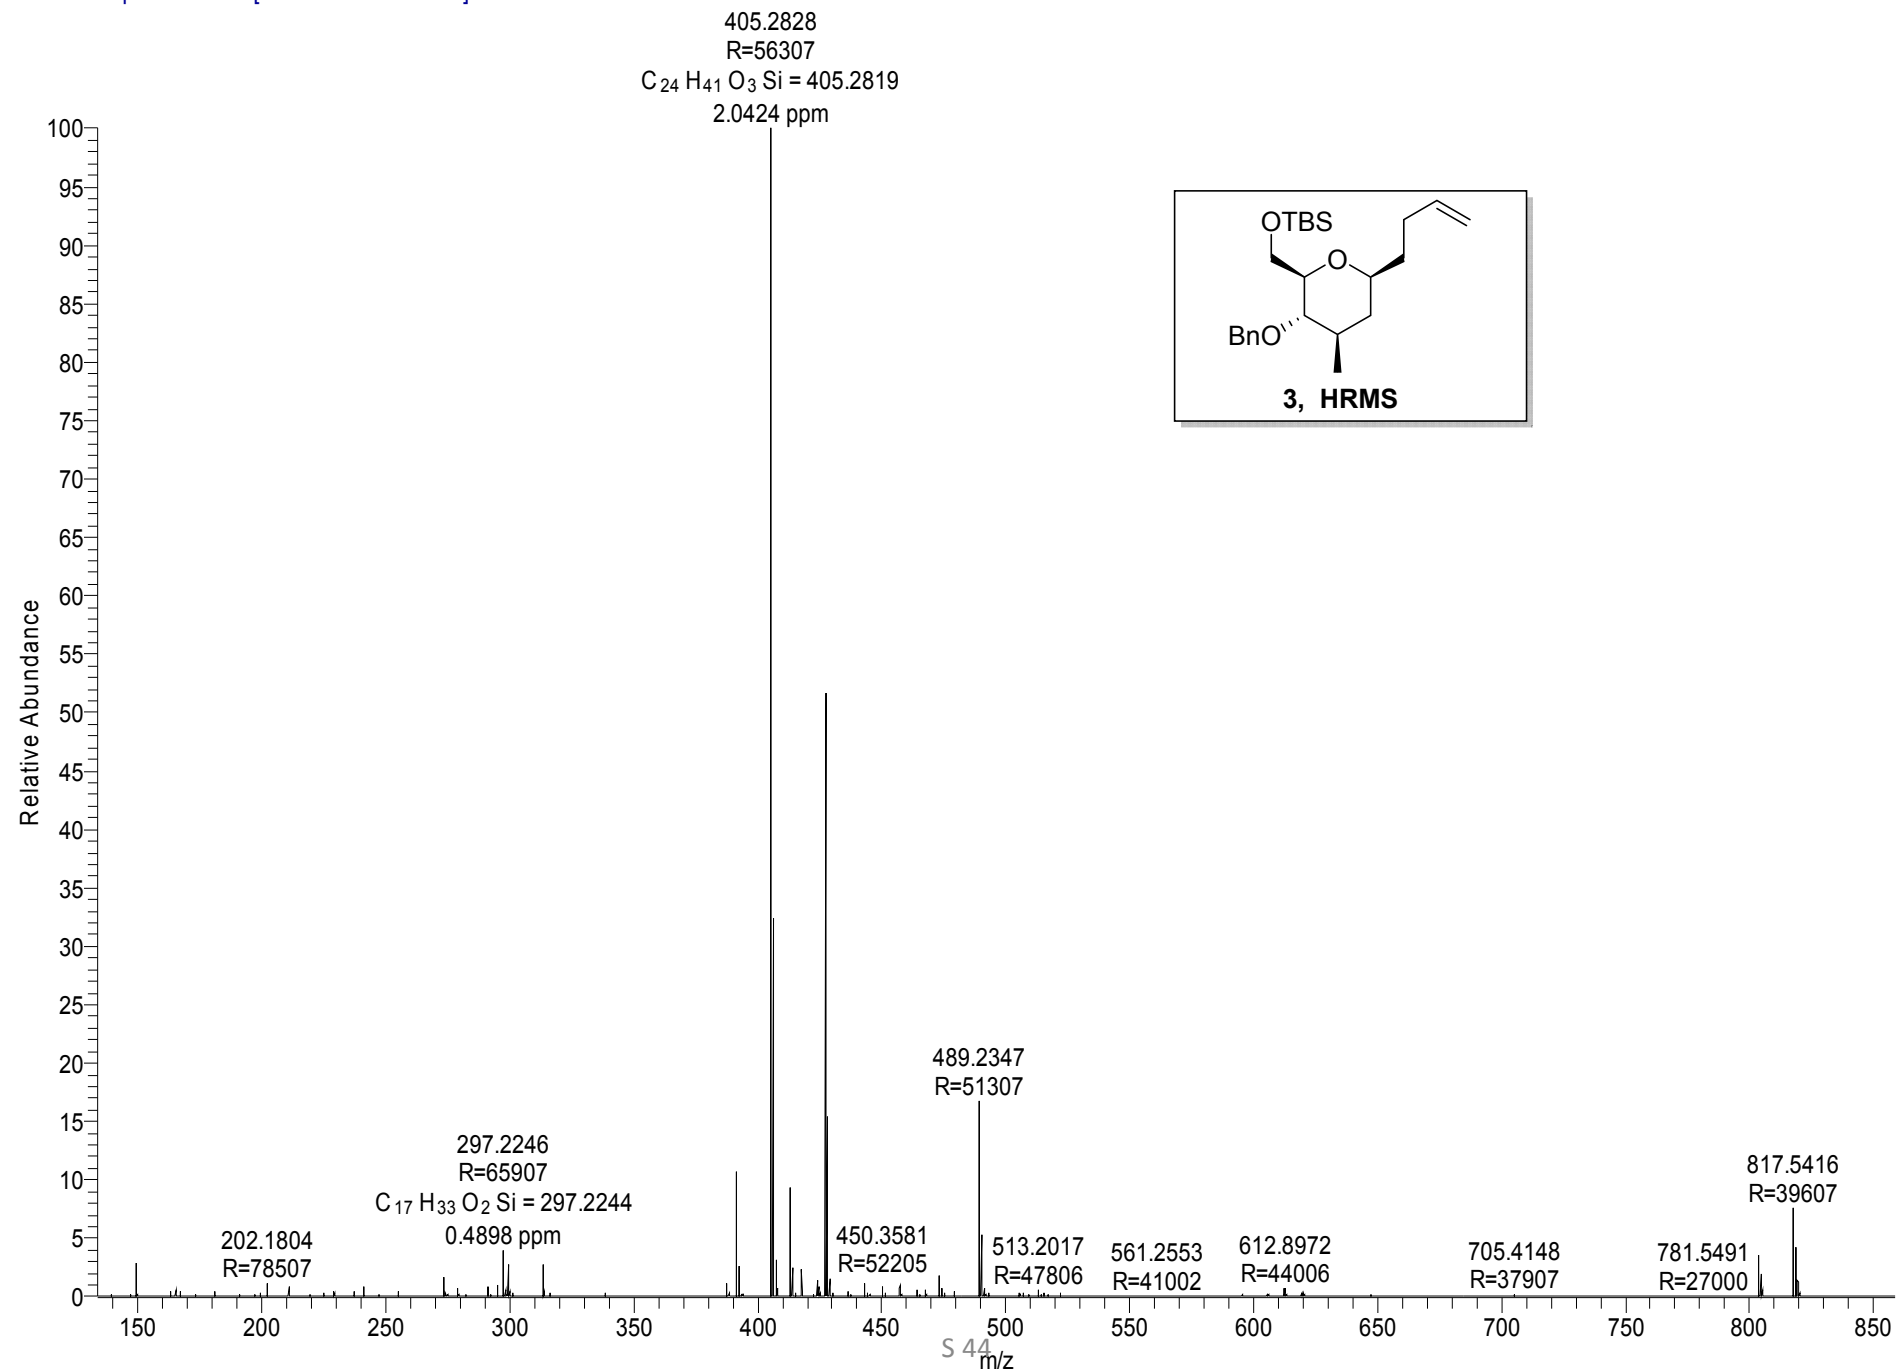

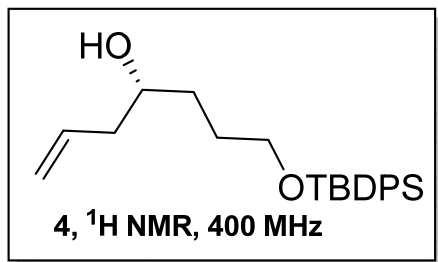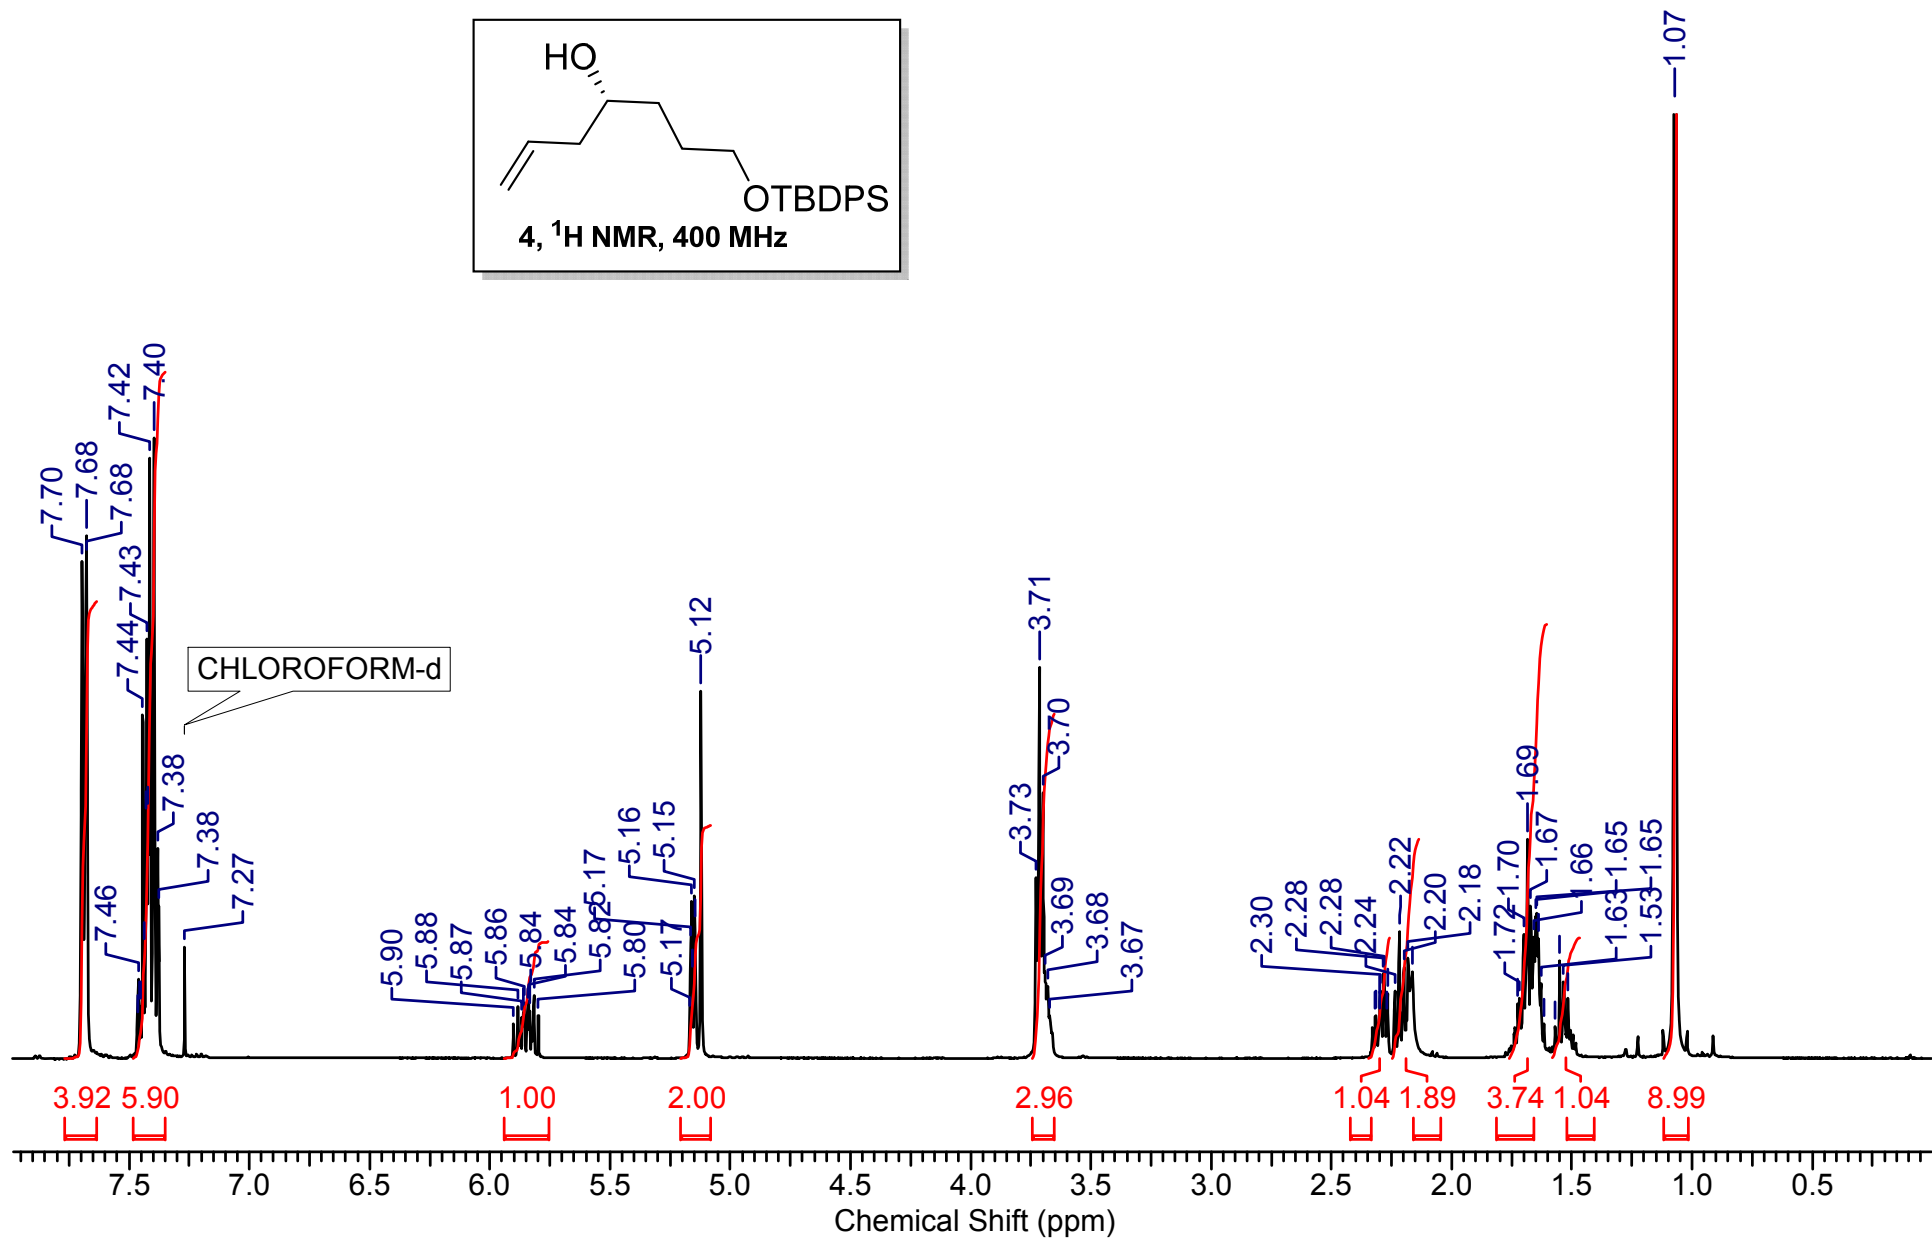

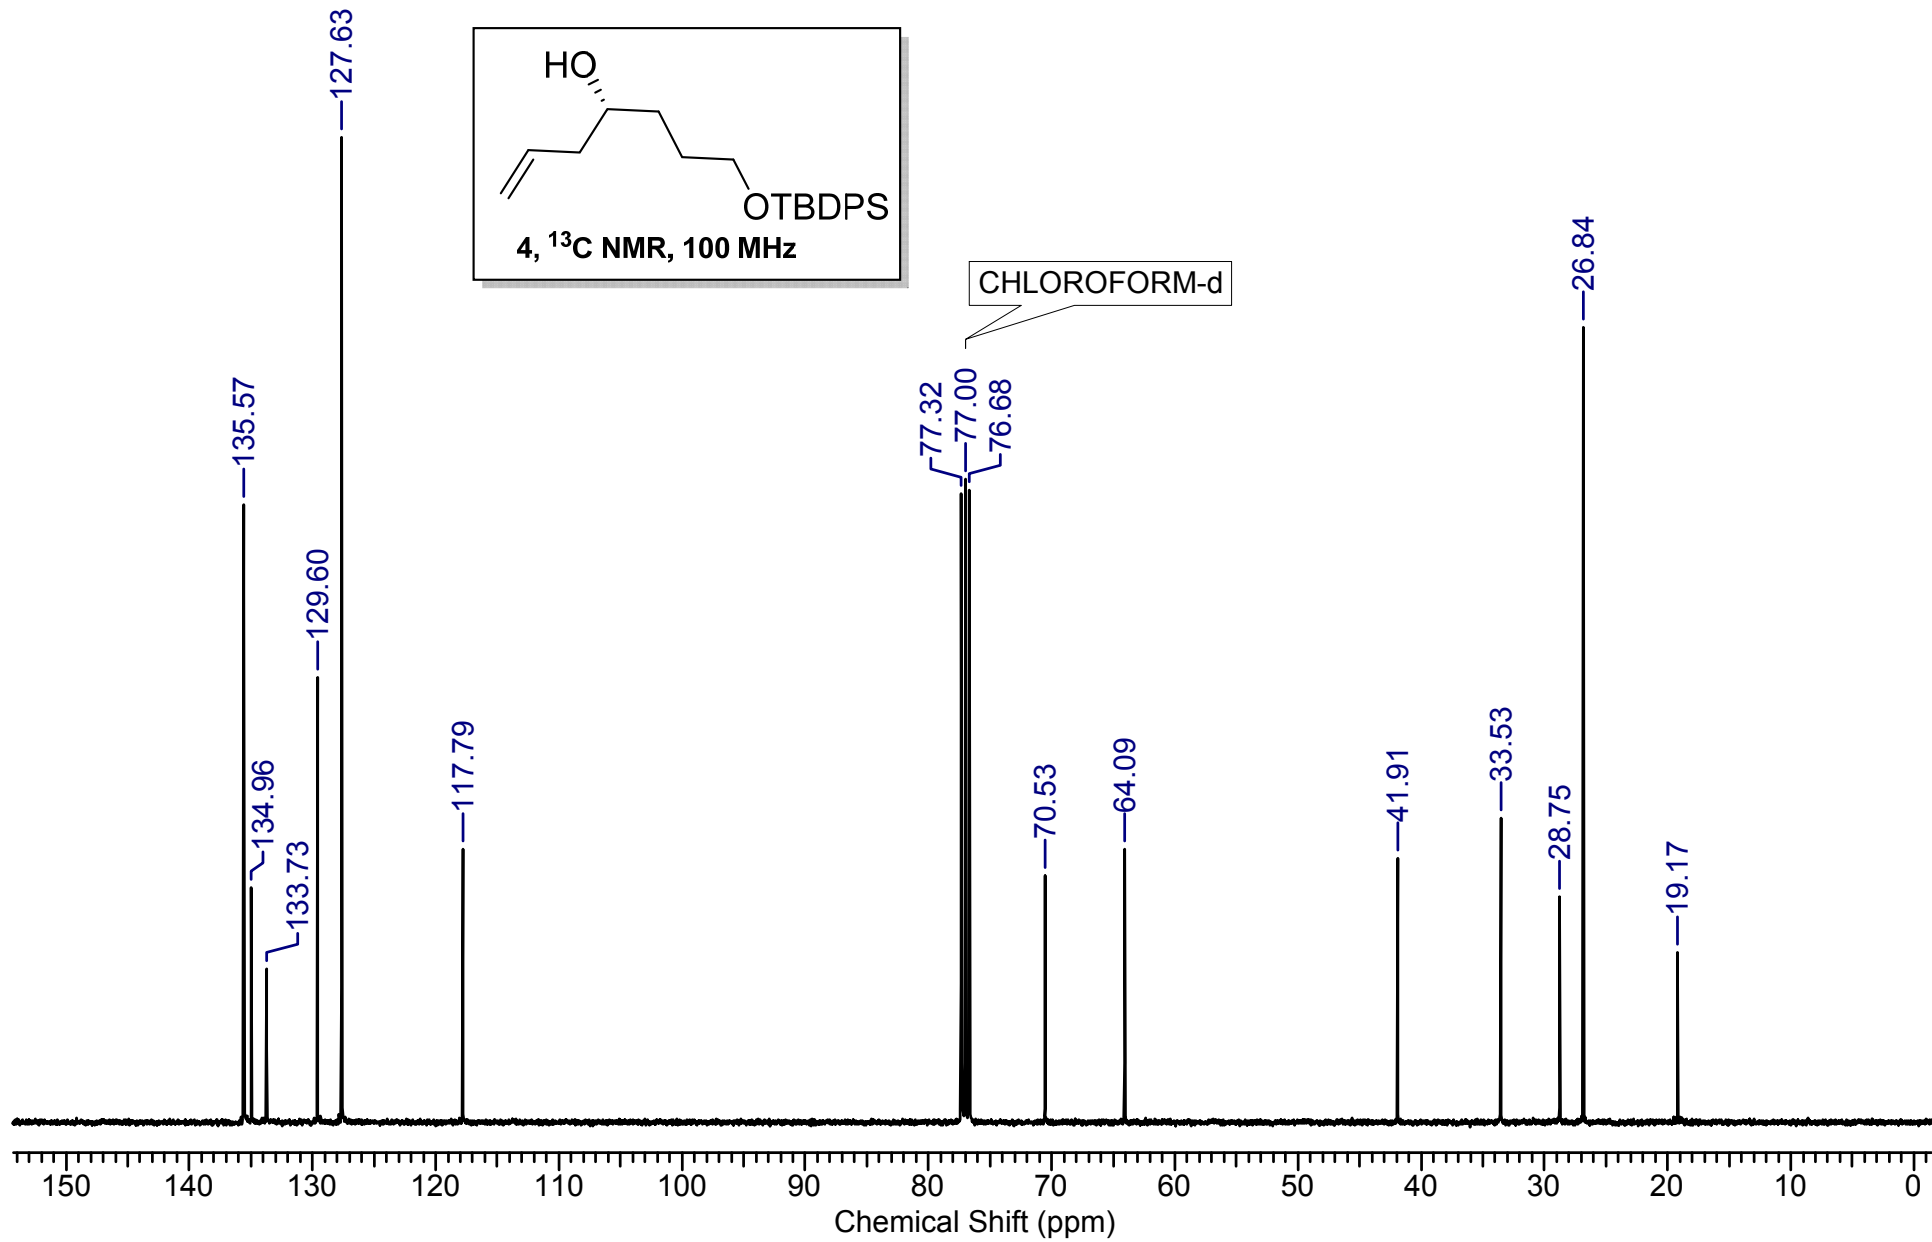

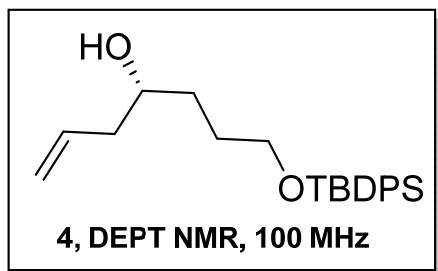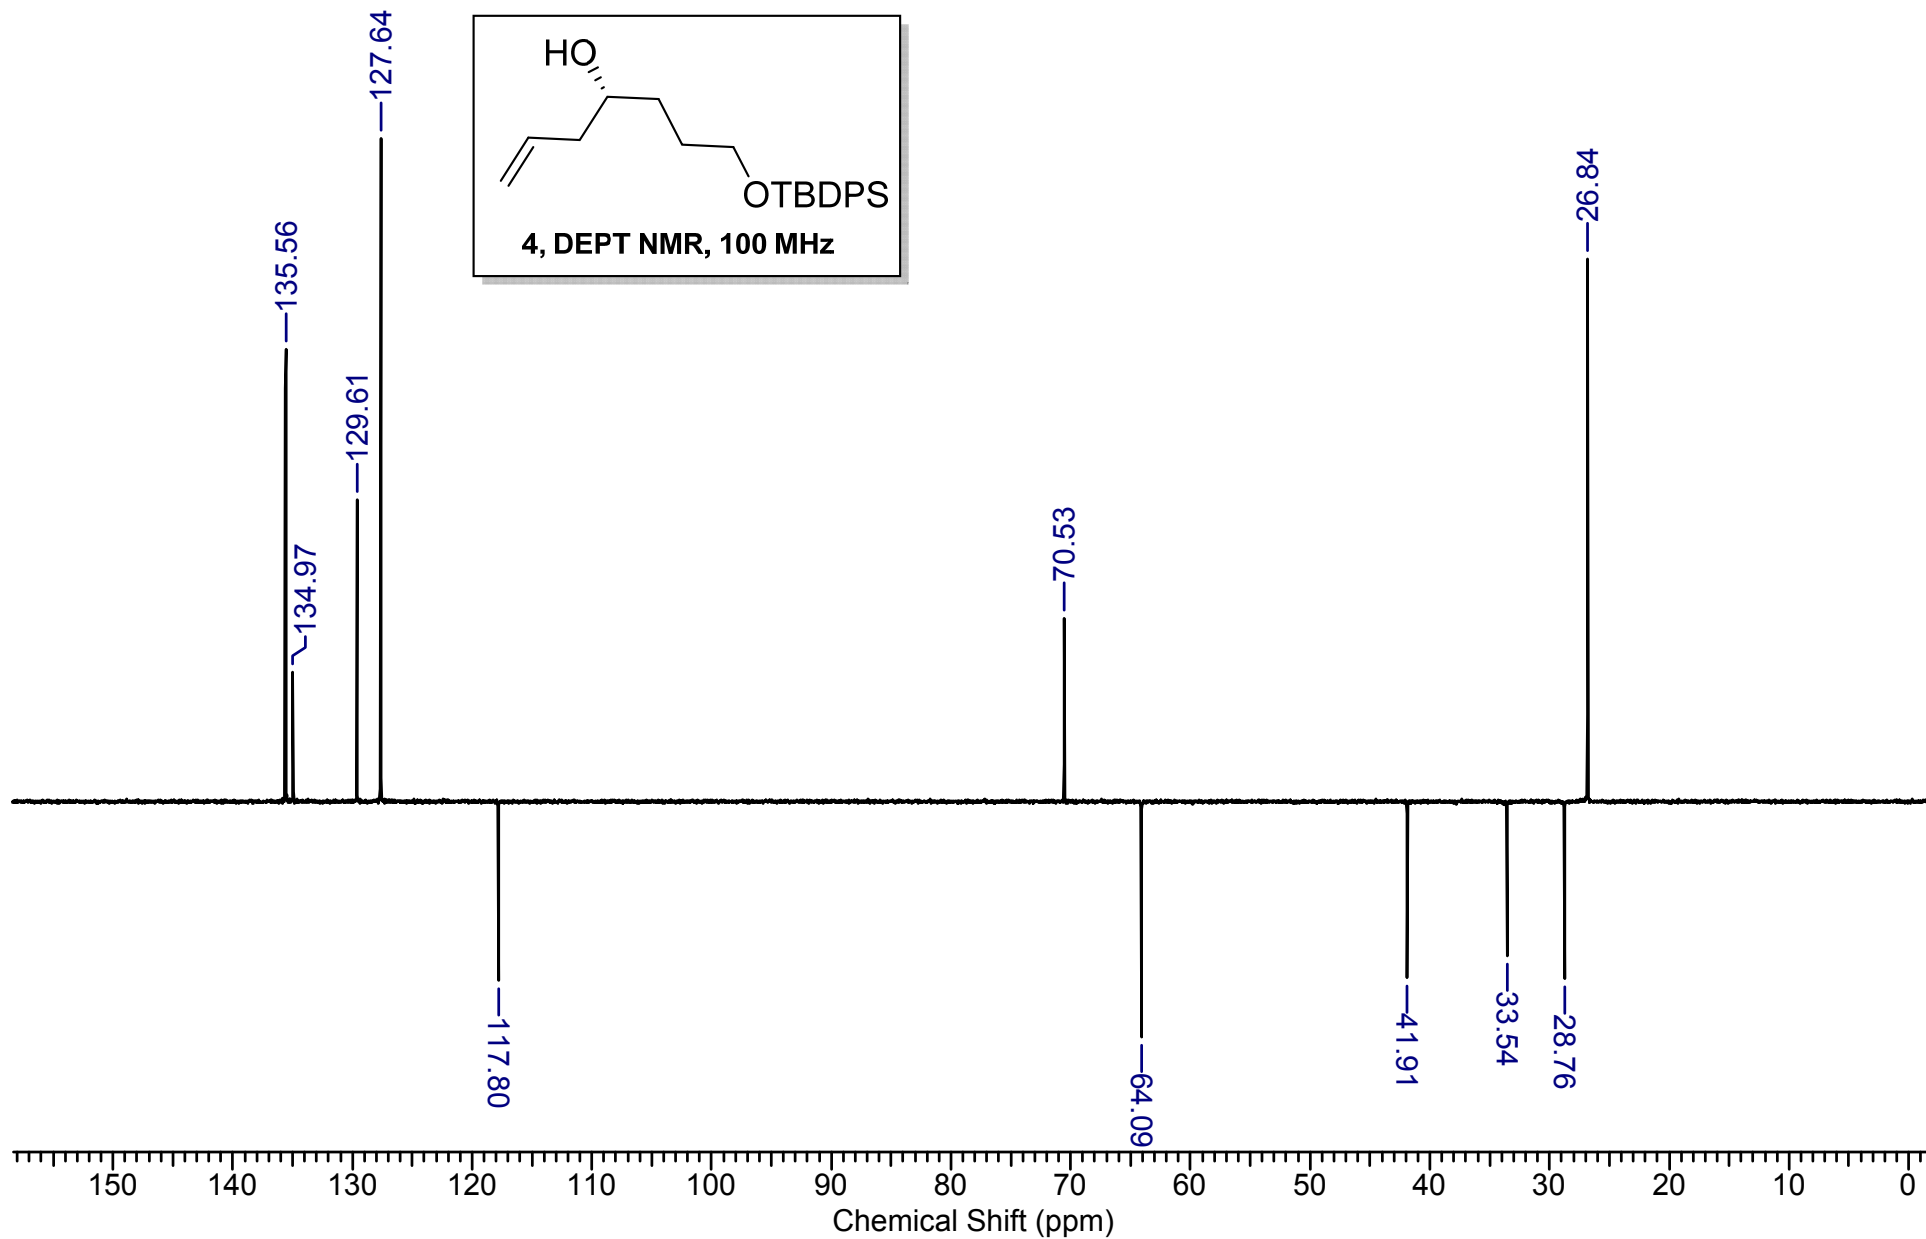

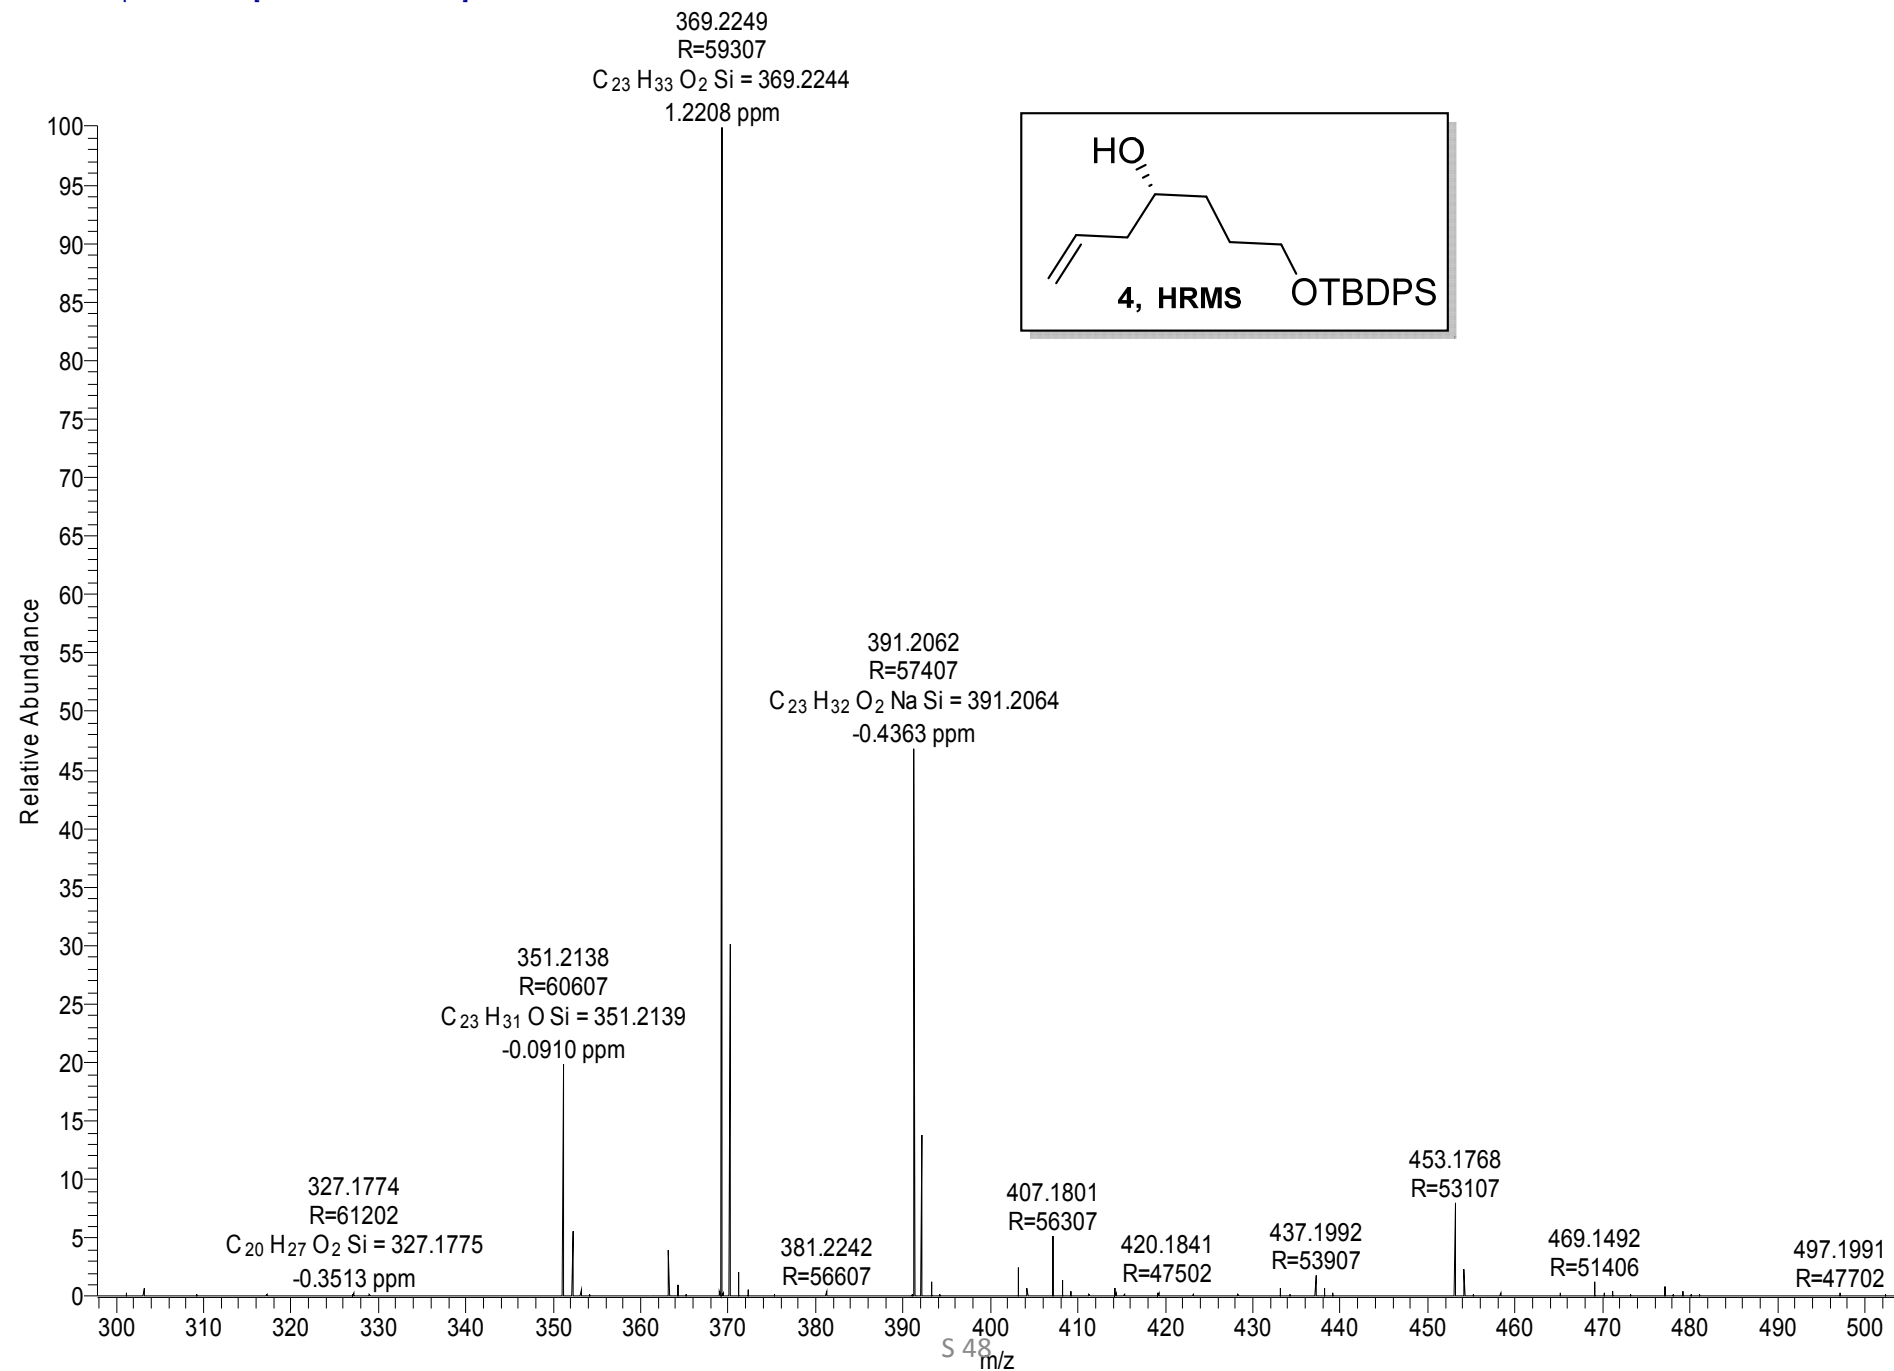



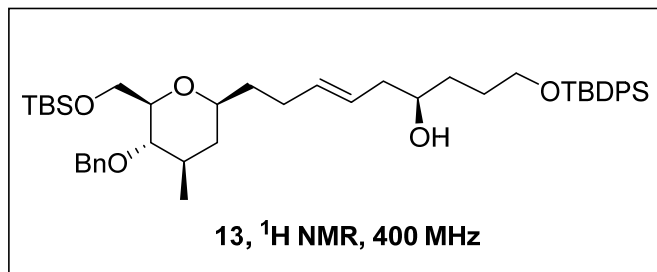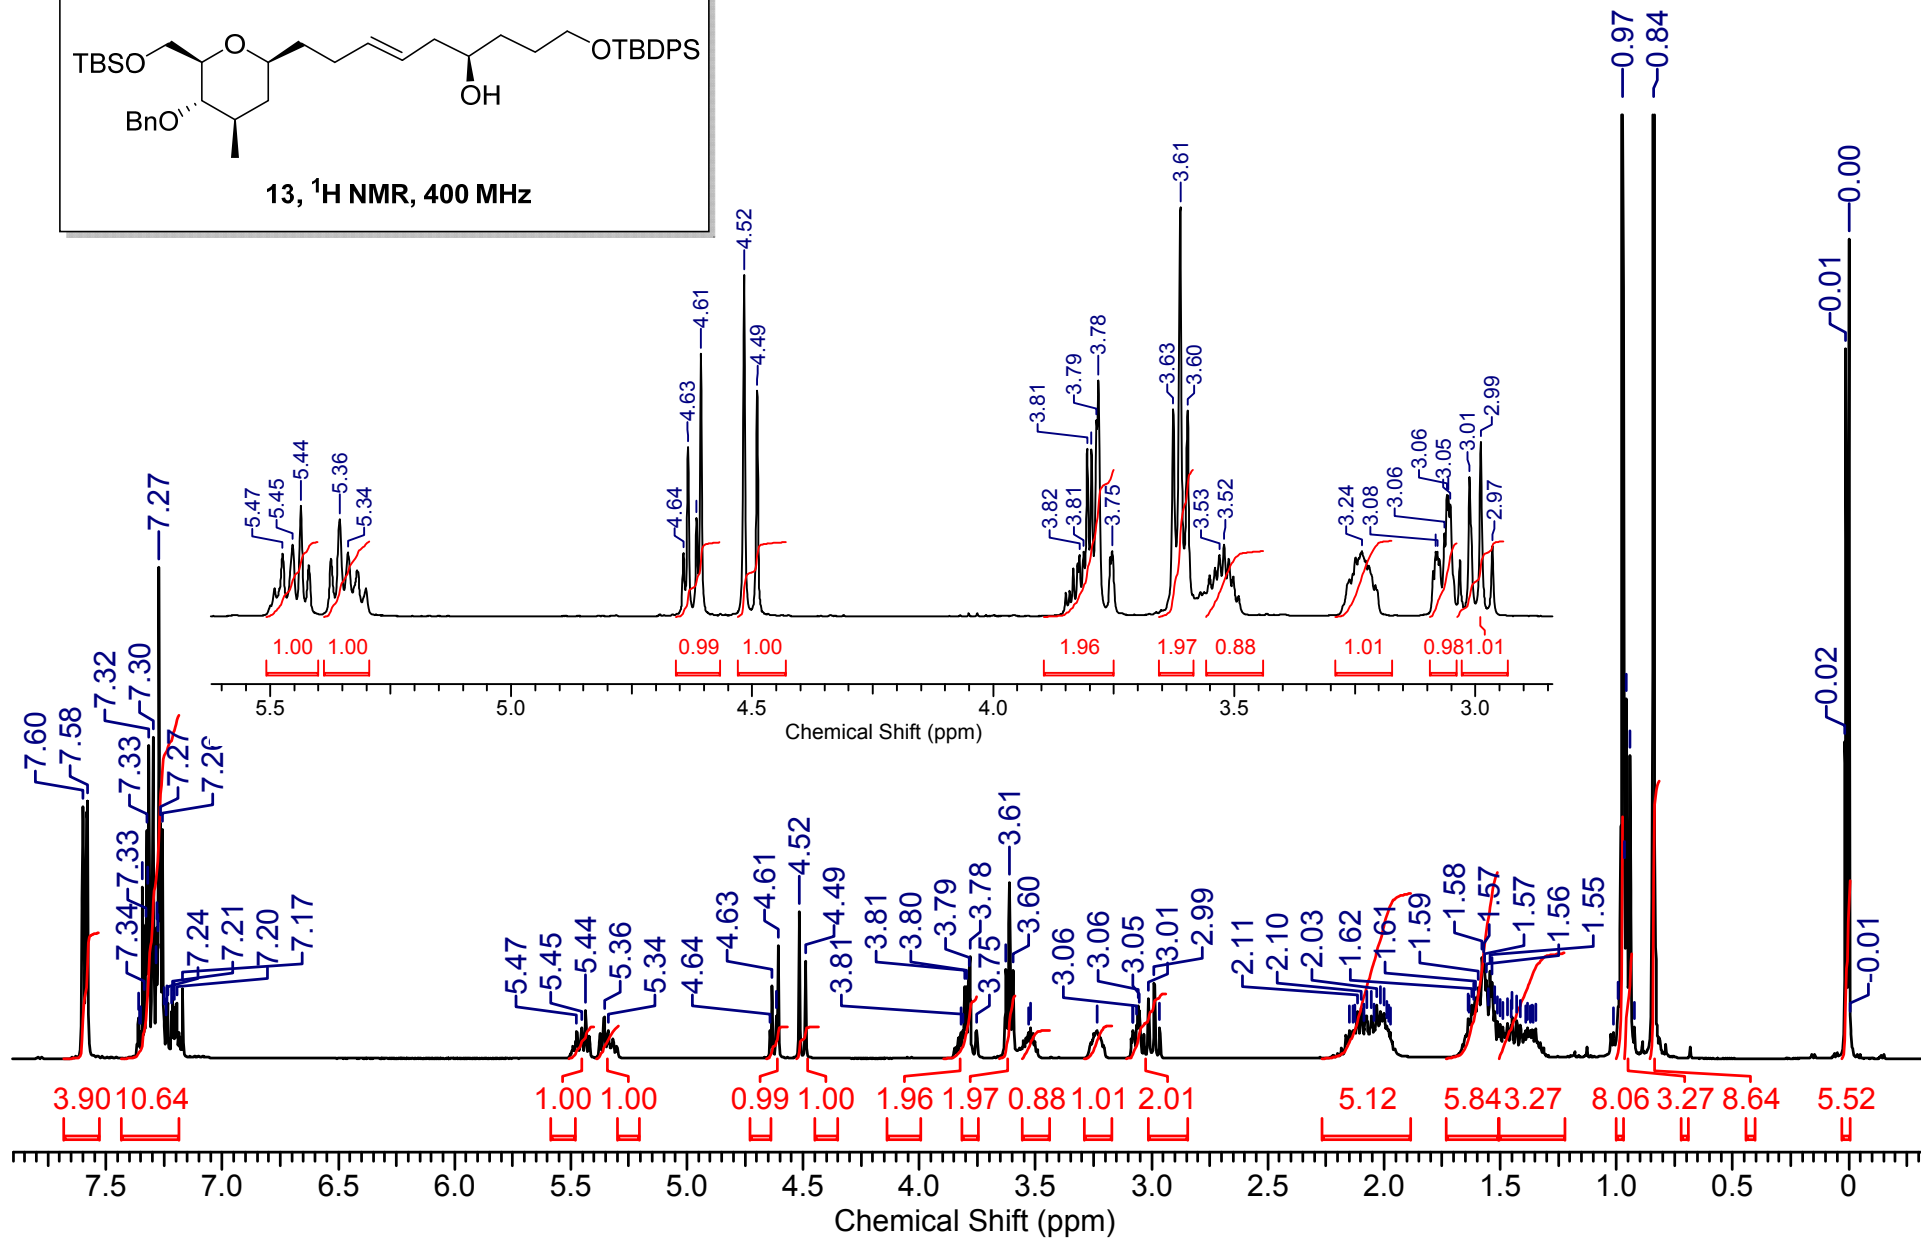

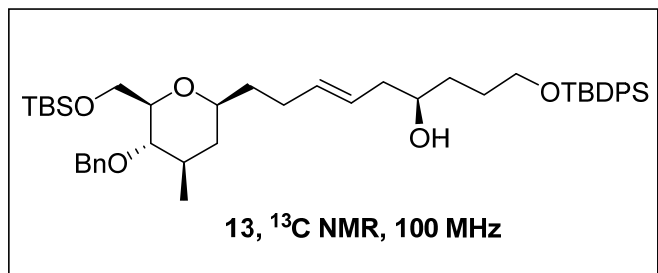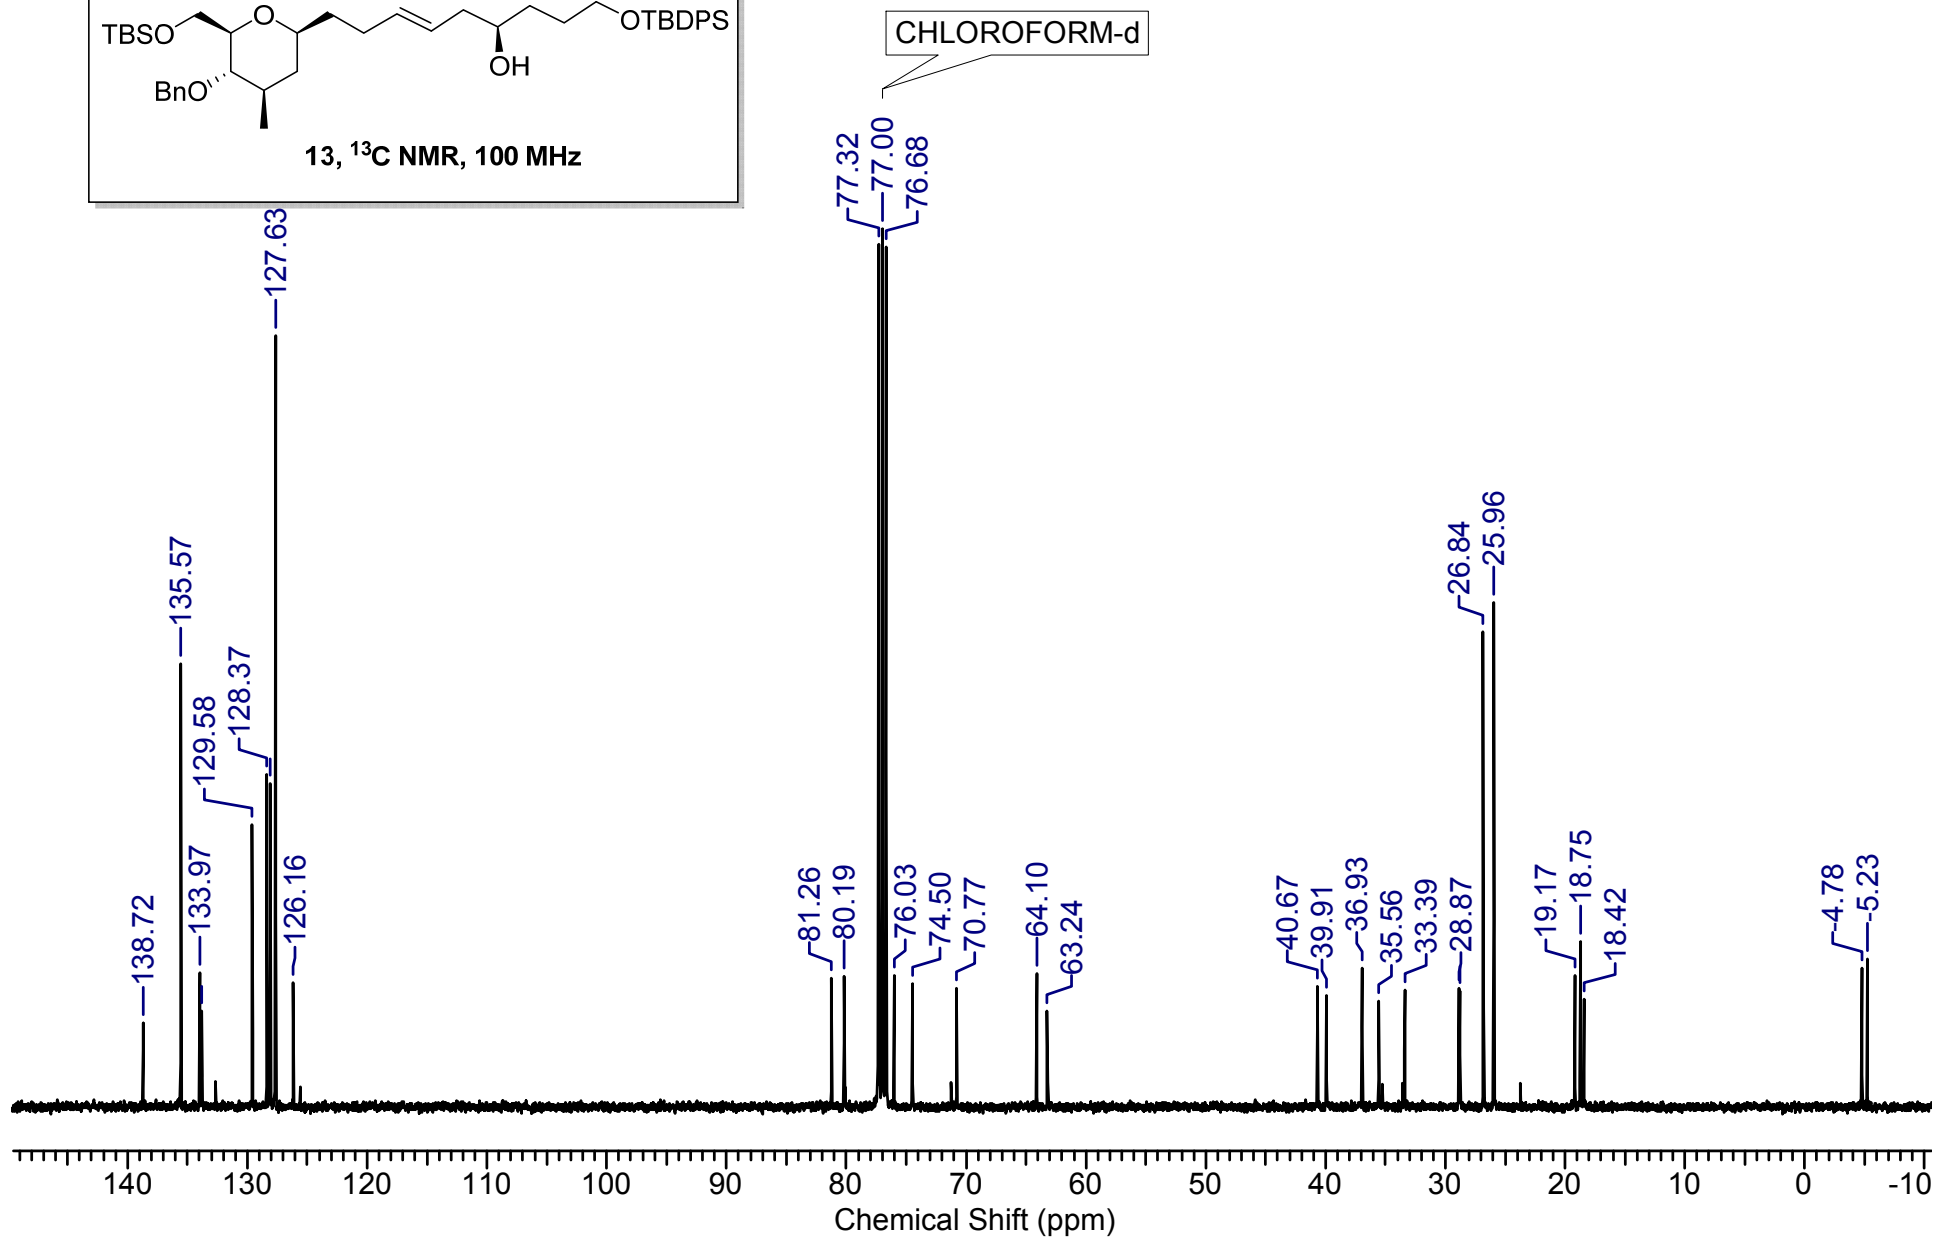

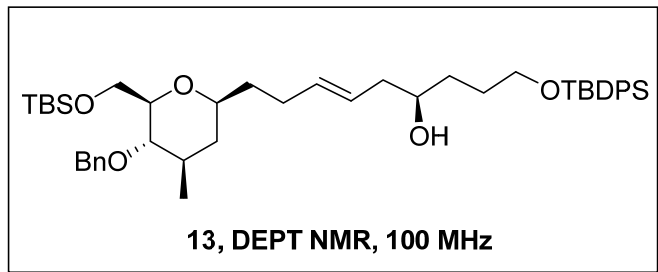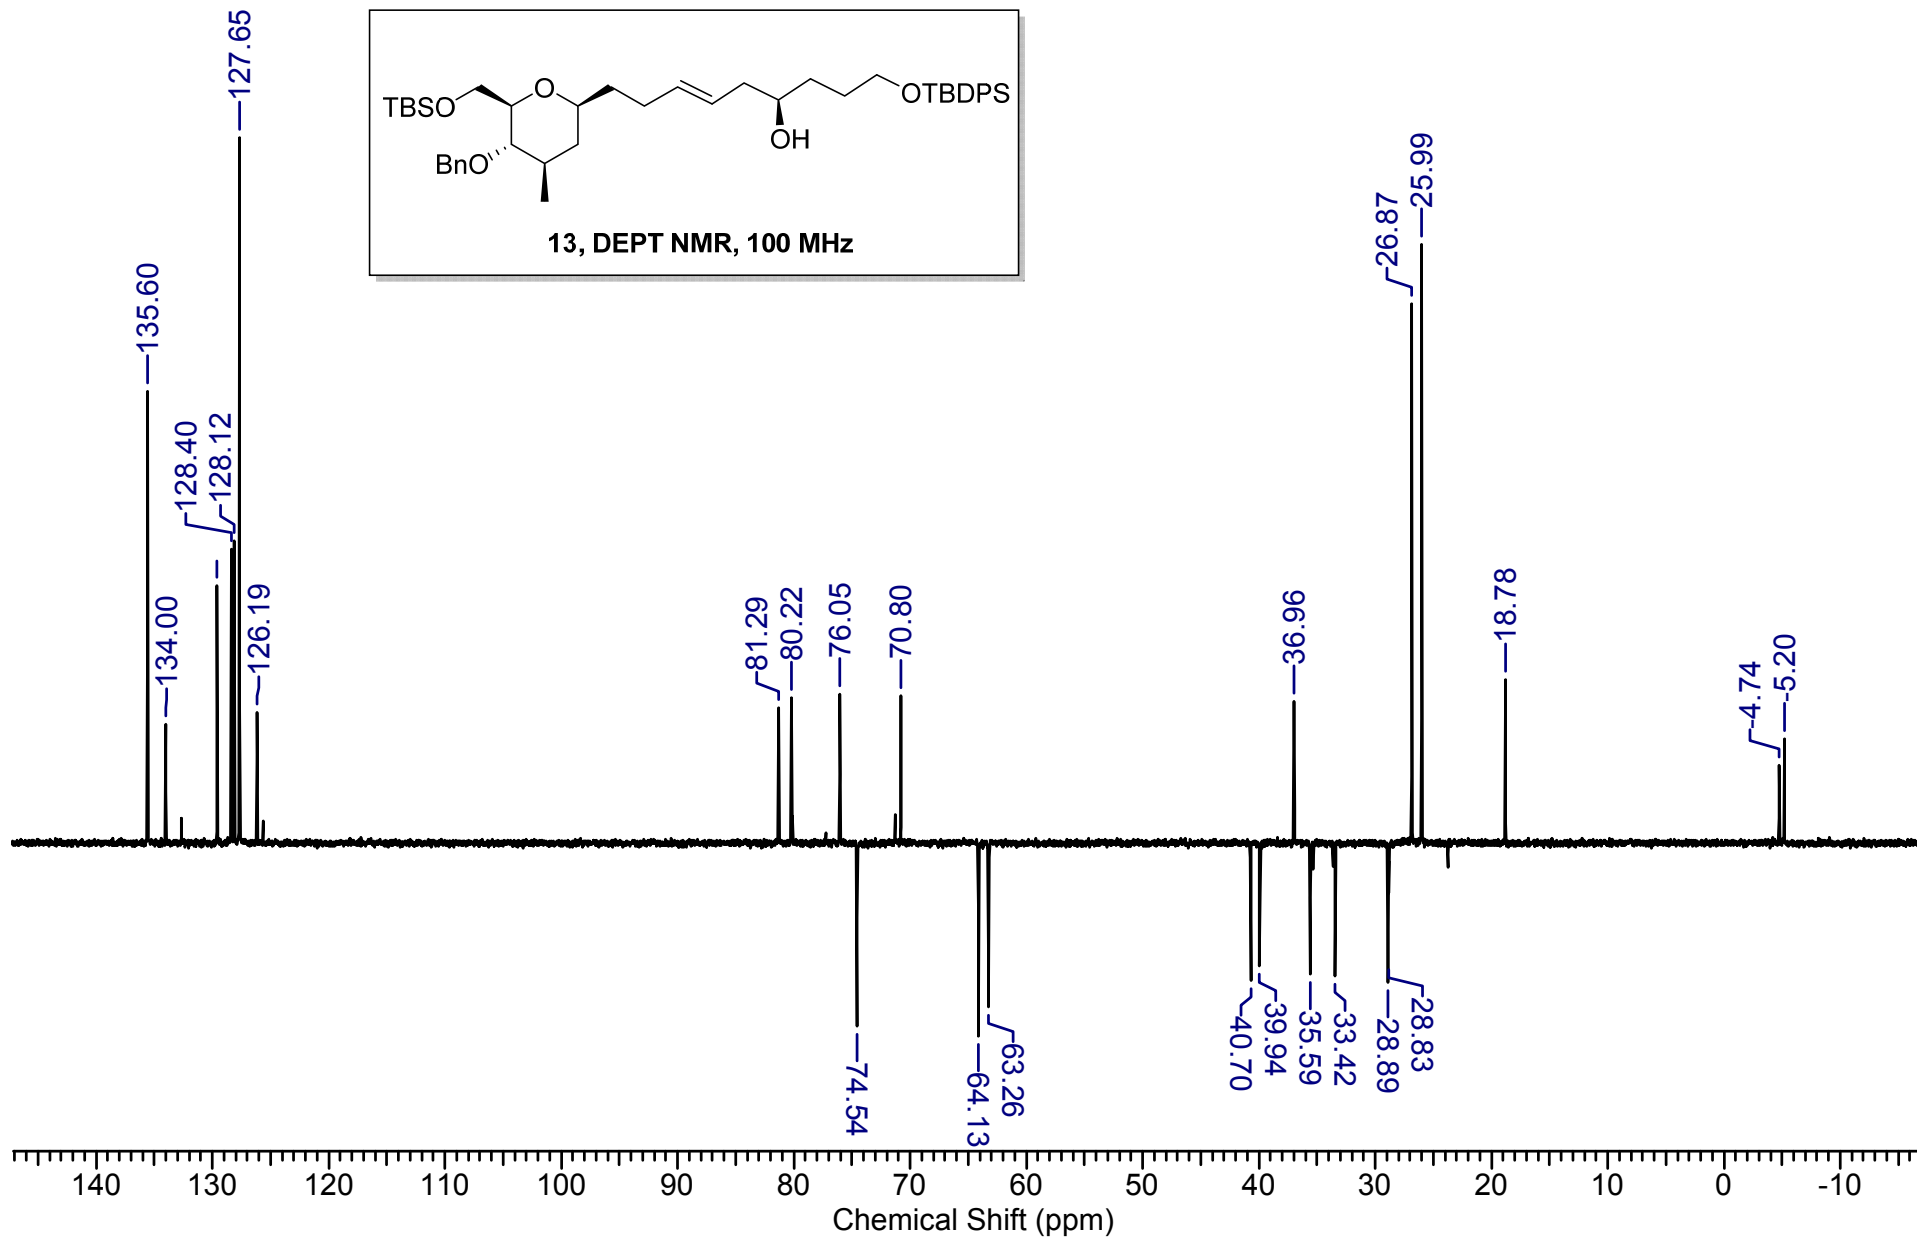

SS-618\_190919134133 #1060 RT: 5.85 AV: 1 NL: 1.94E8  
T: FTMS + p ESI Full ms [100.0000-1500.0000]

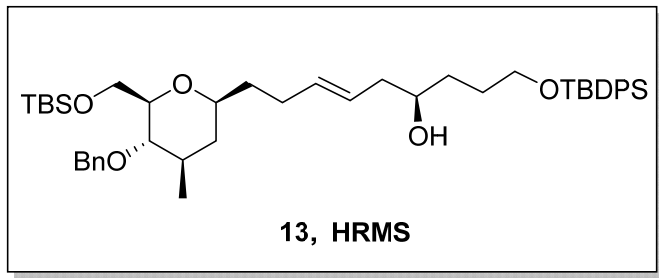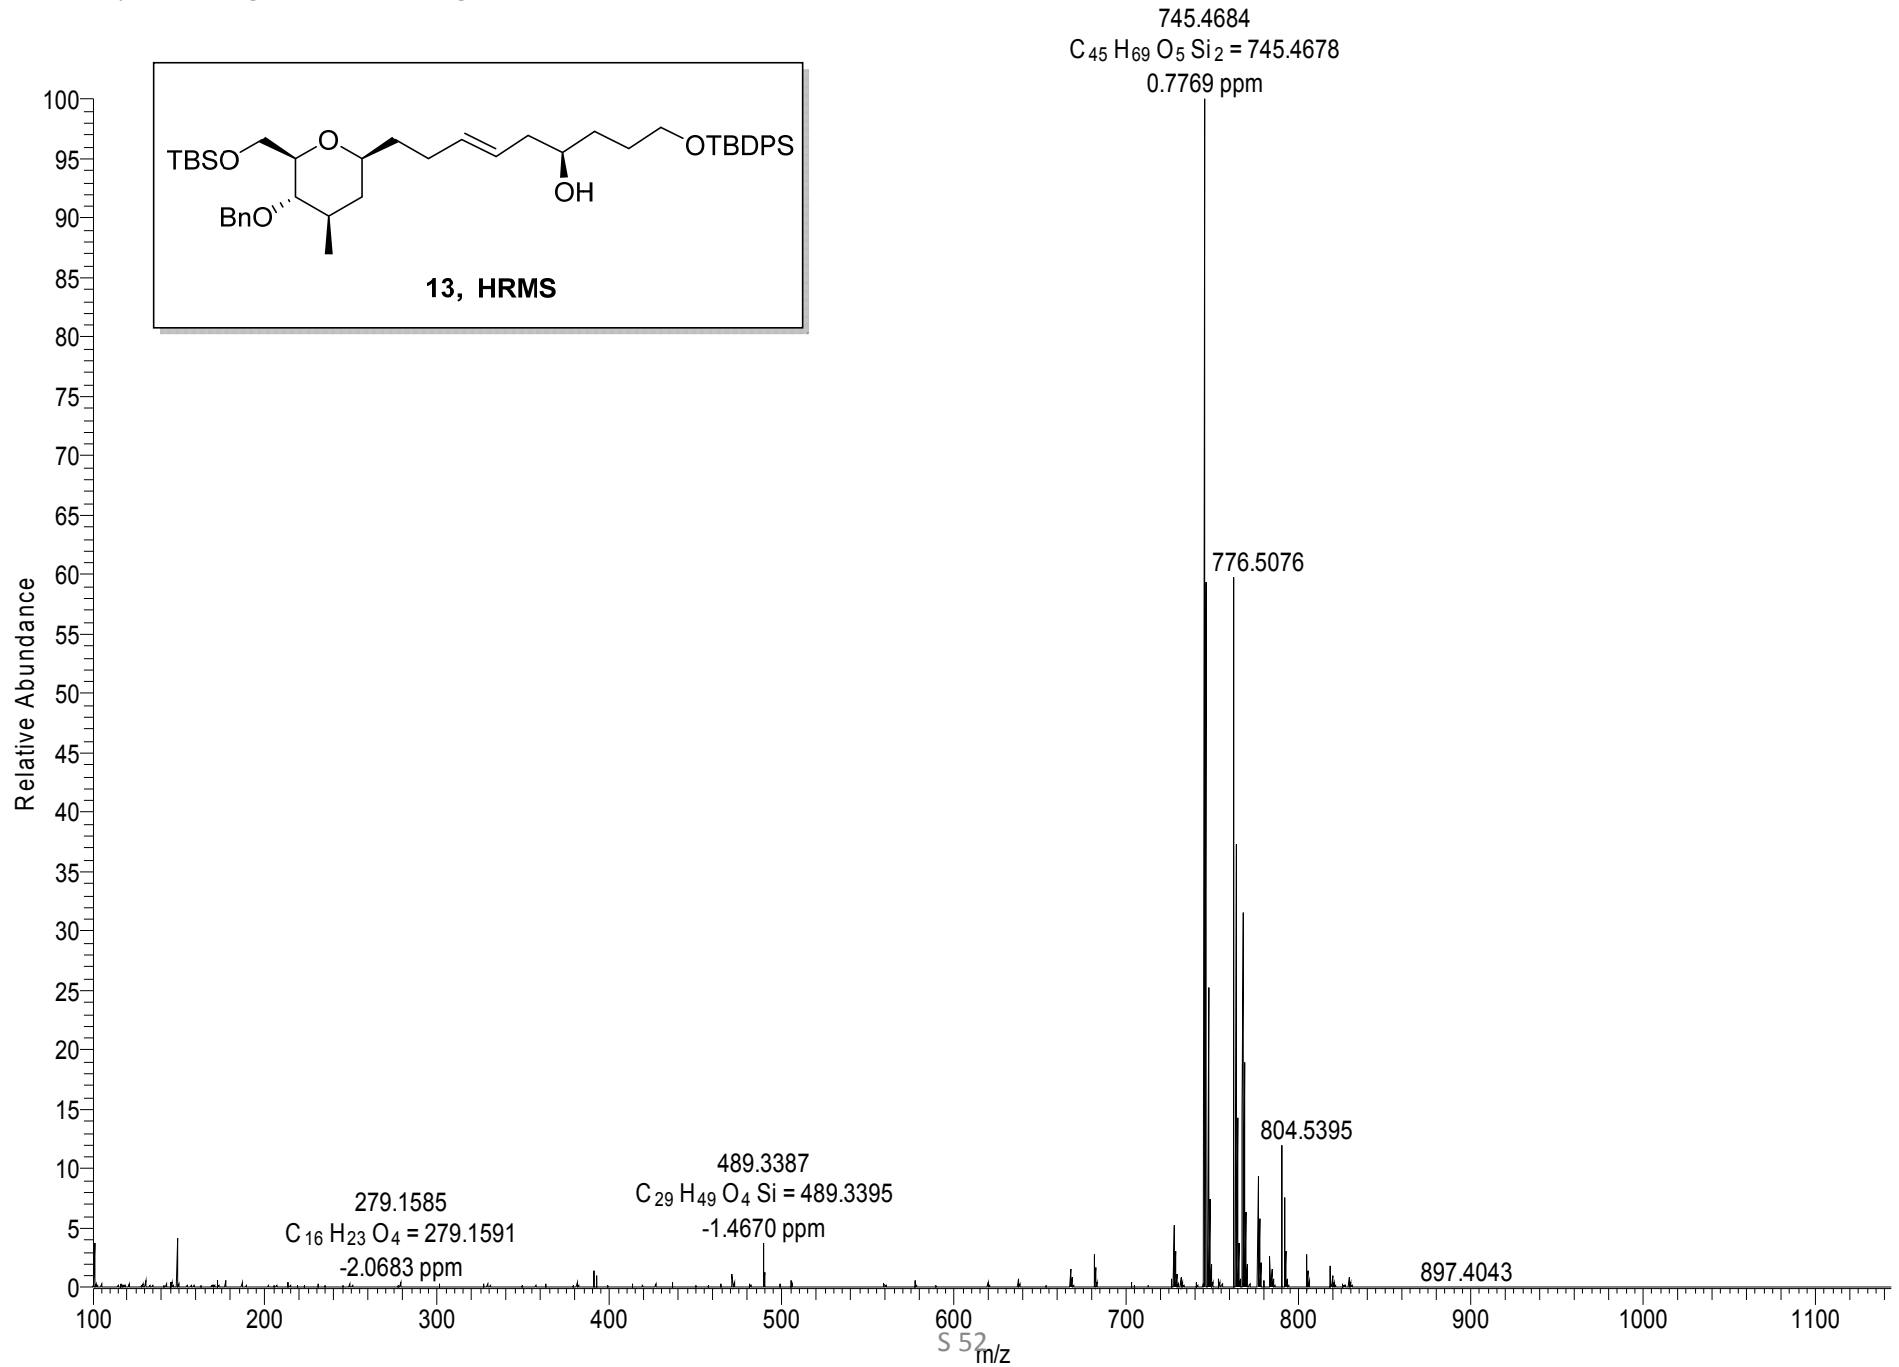

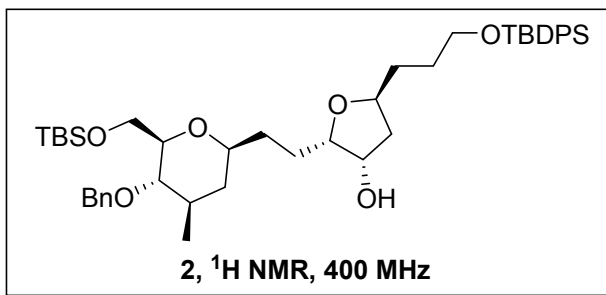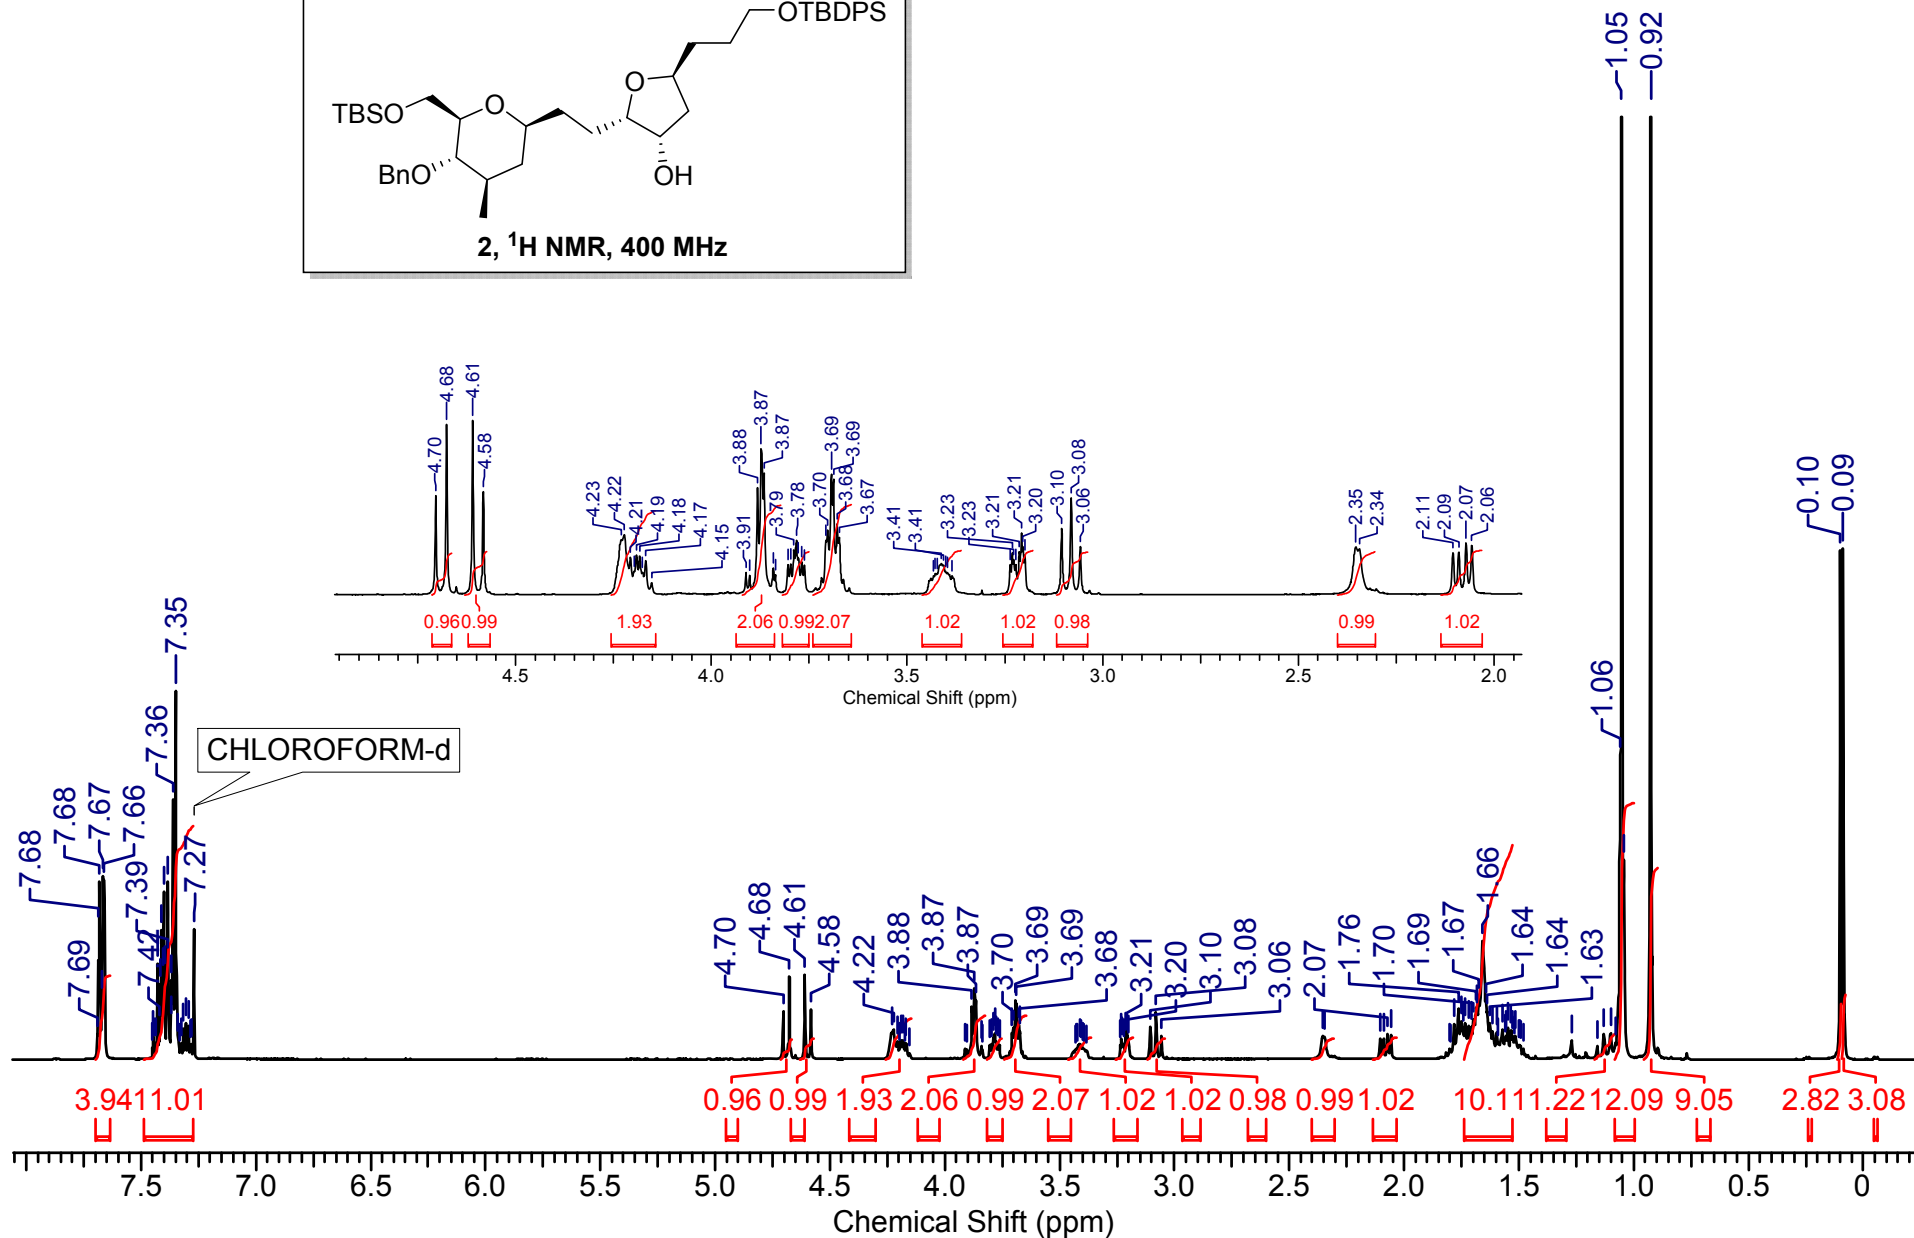

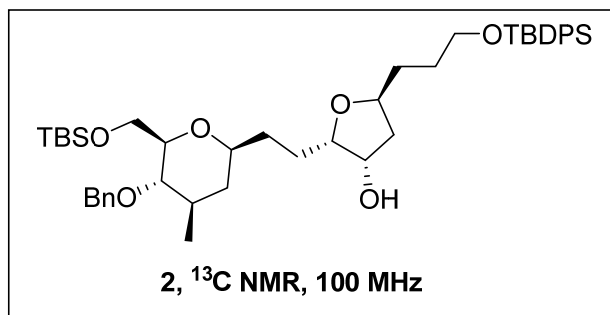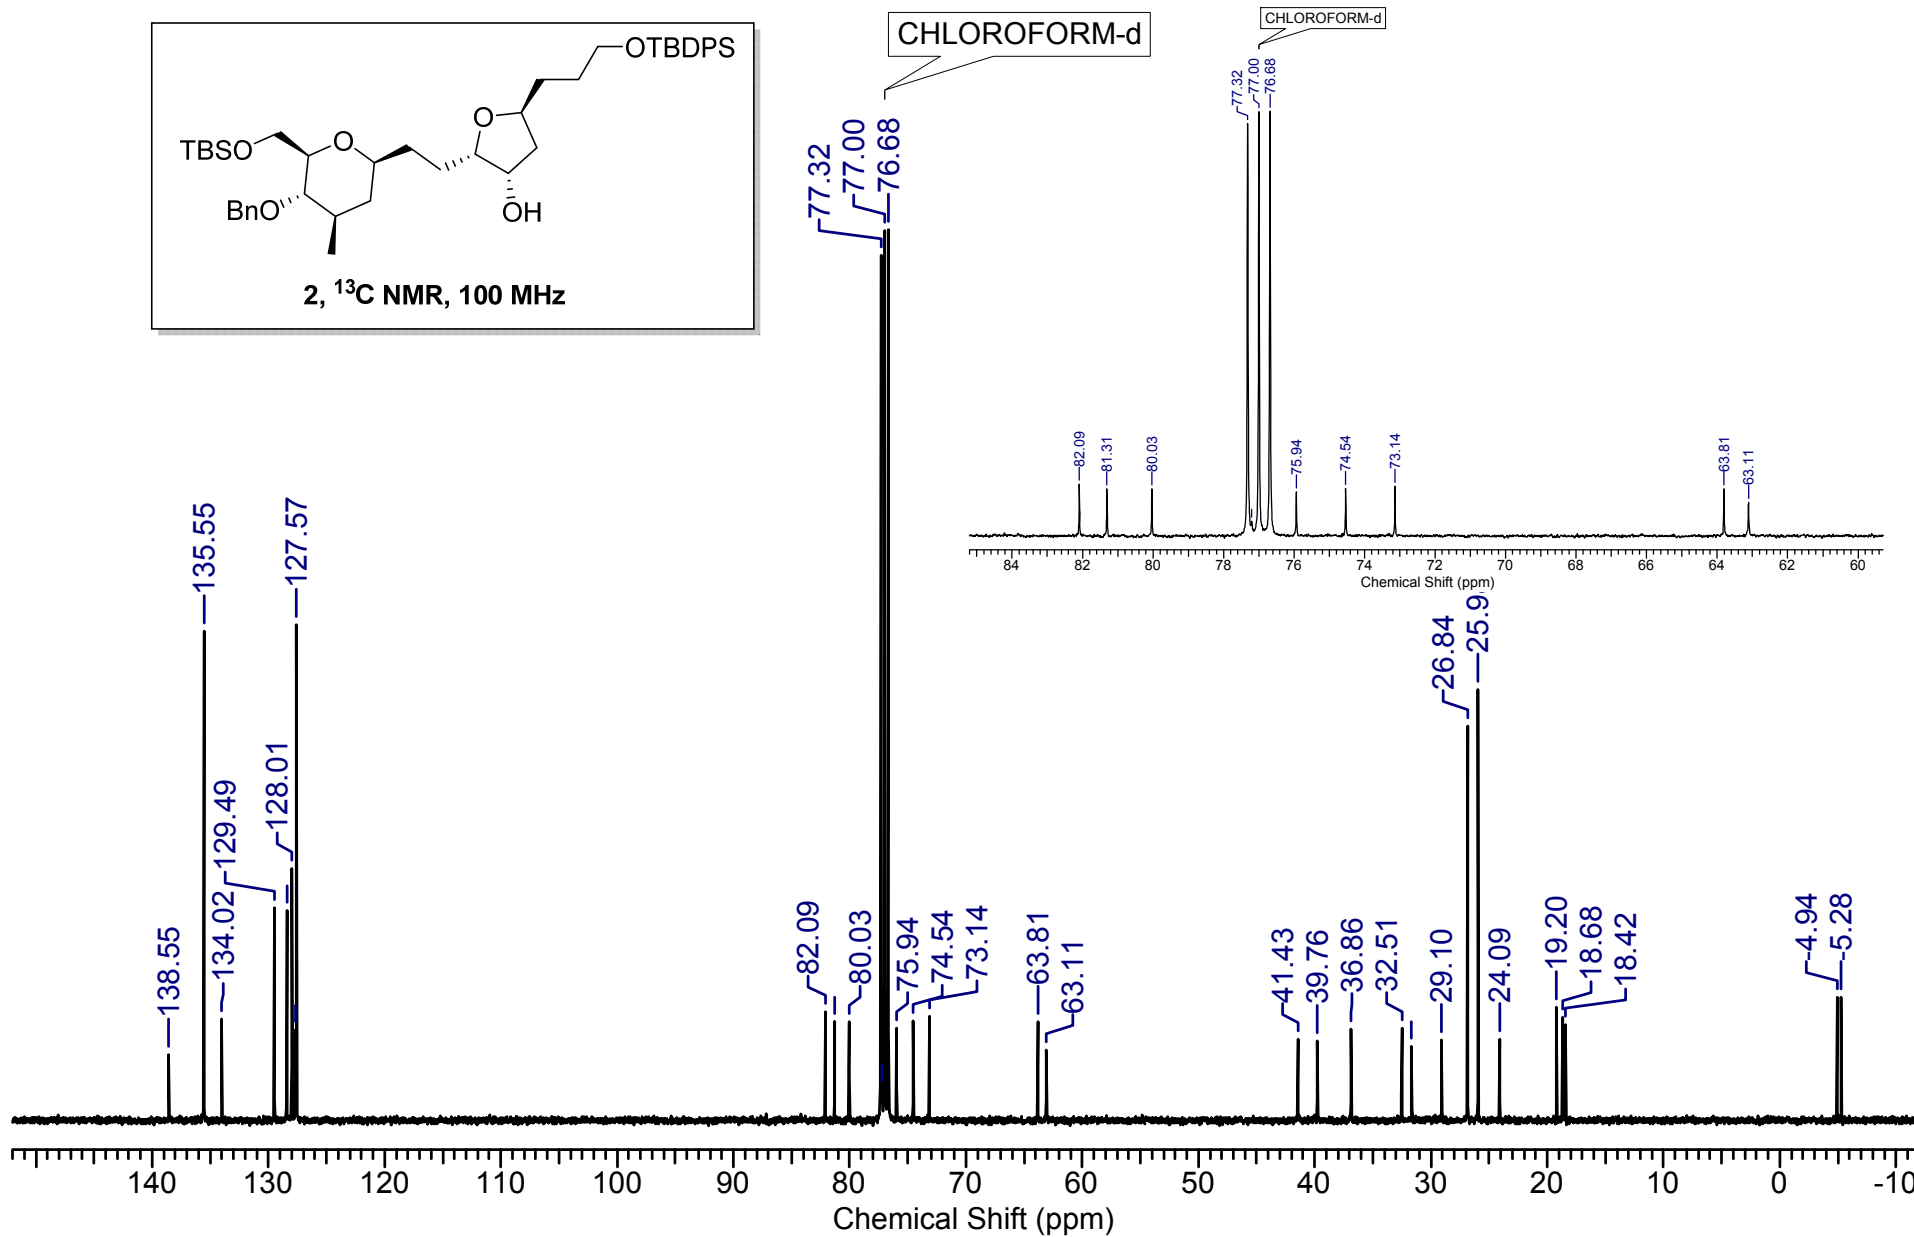

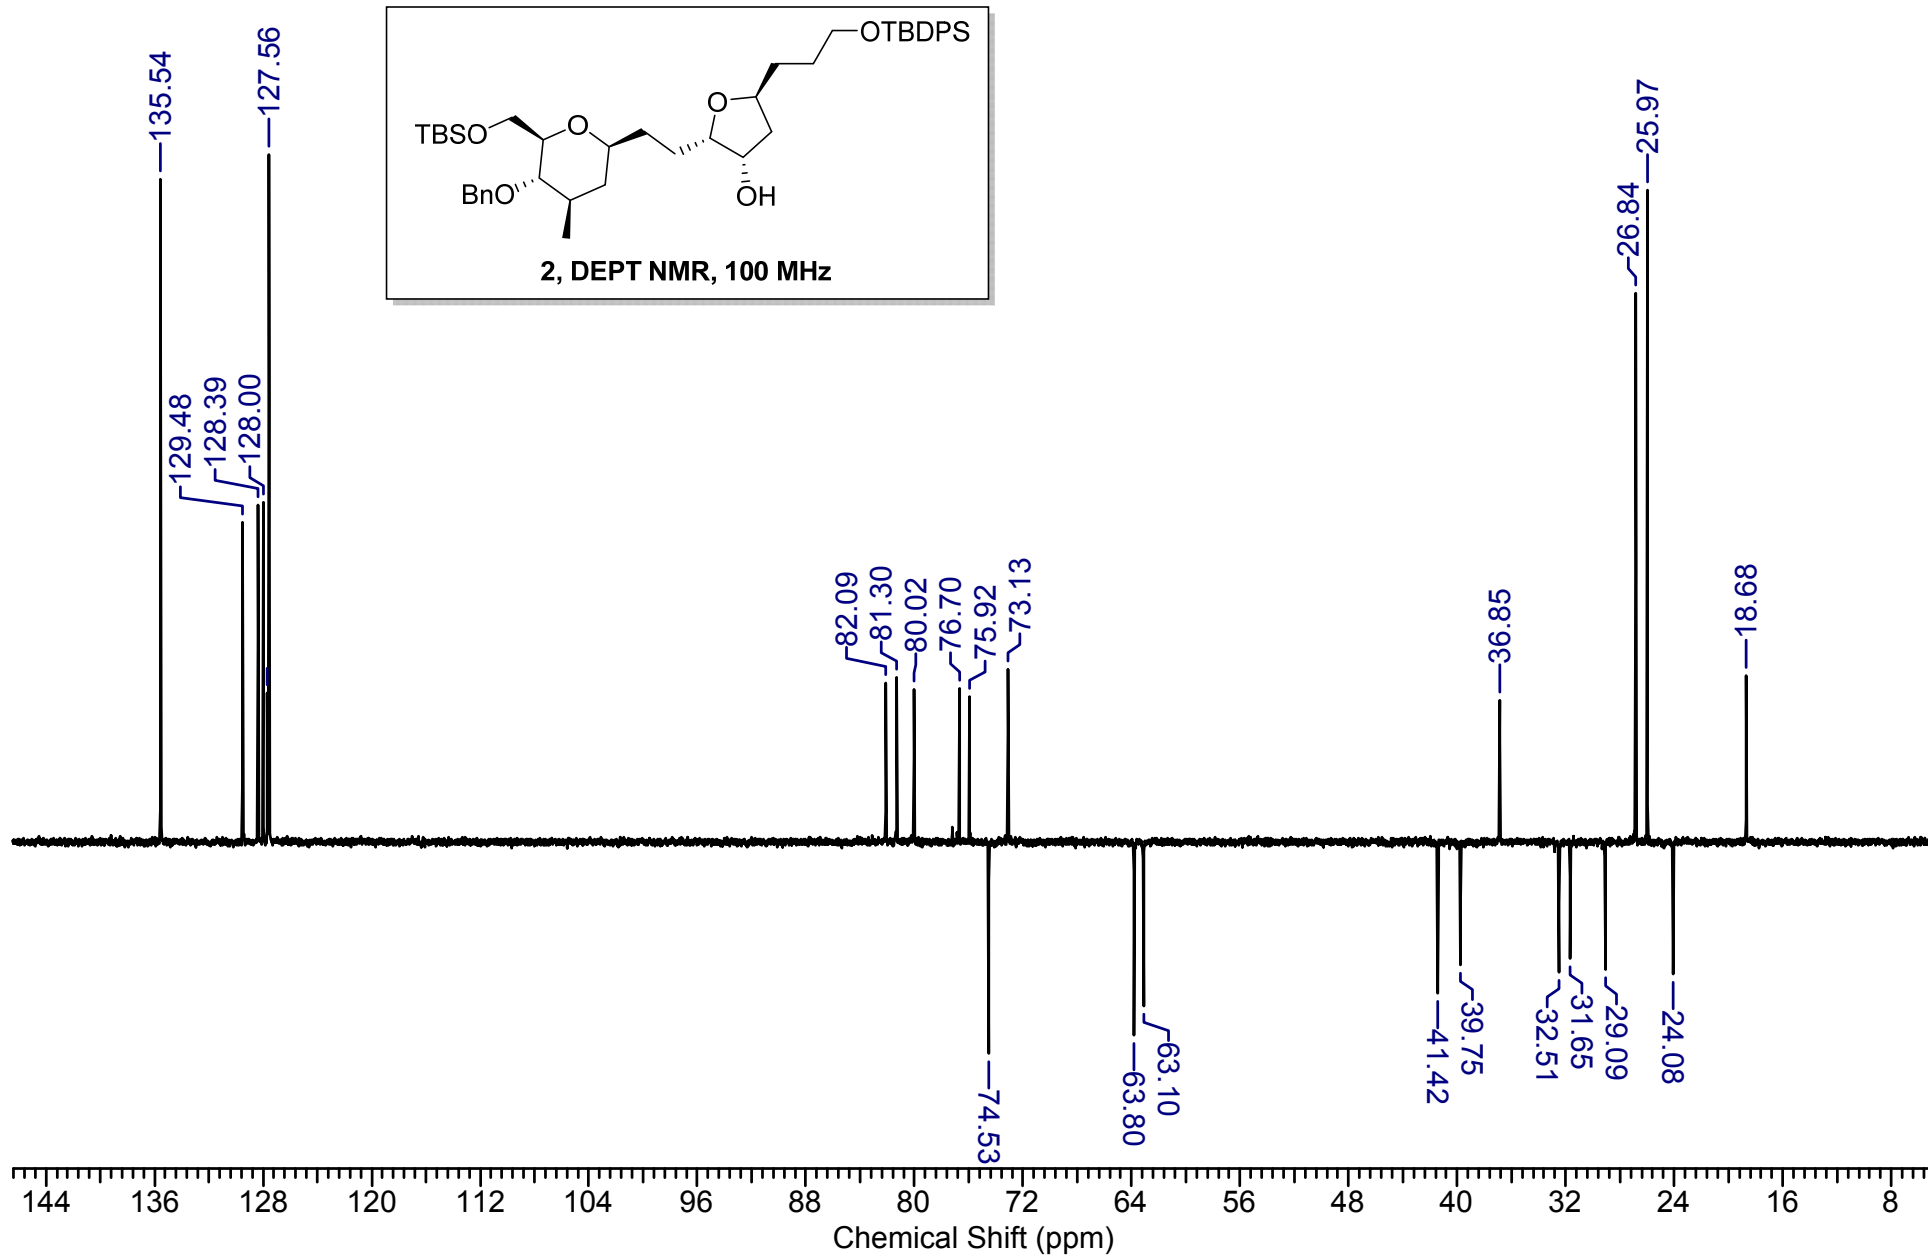

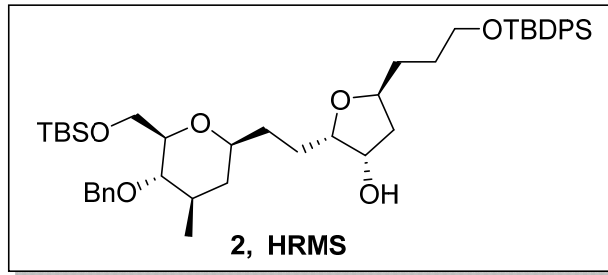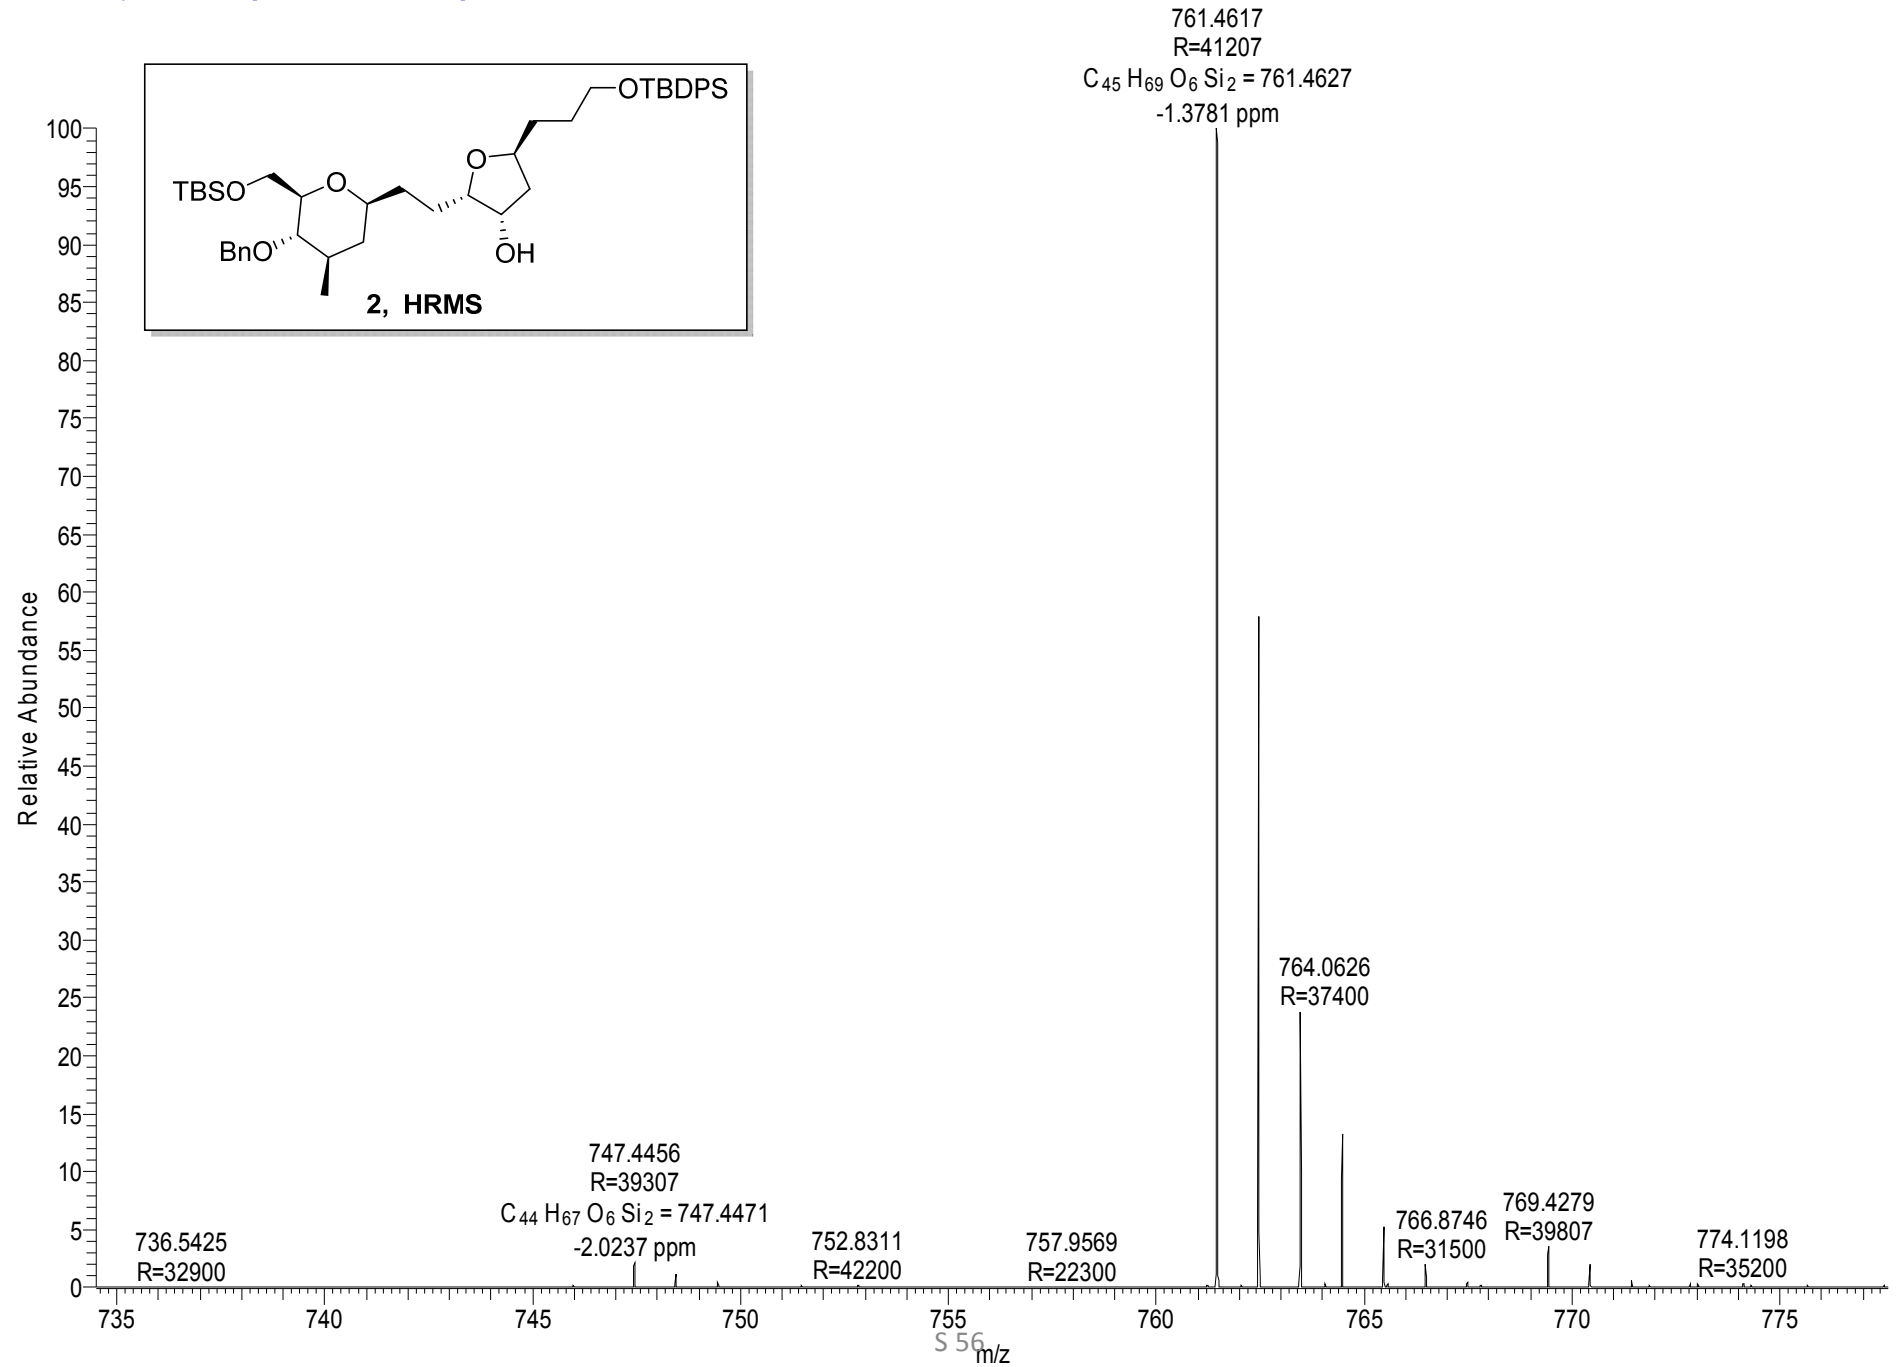



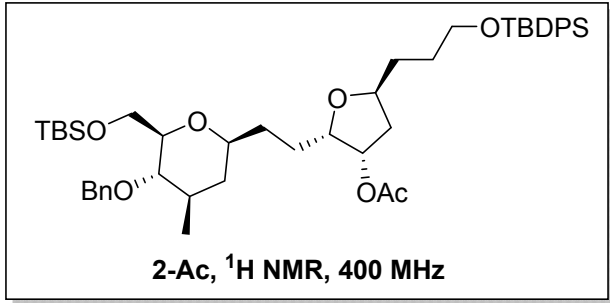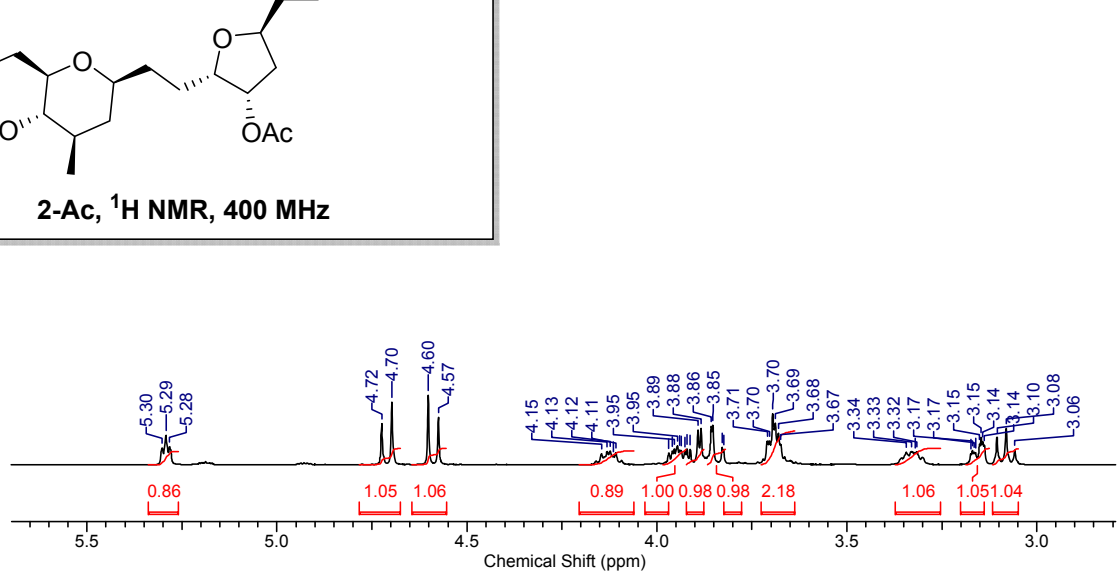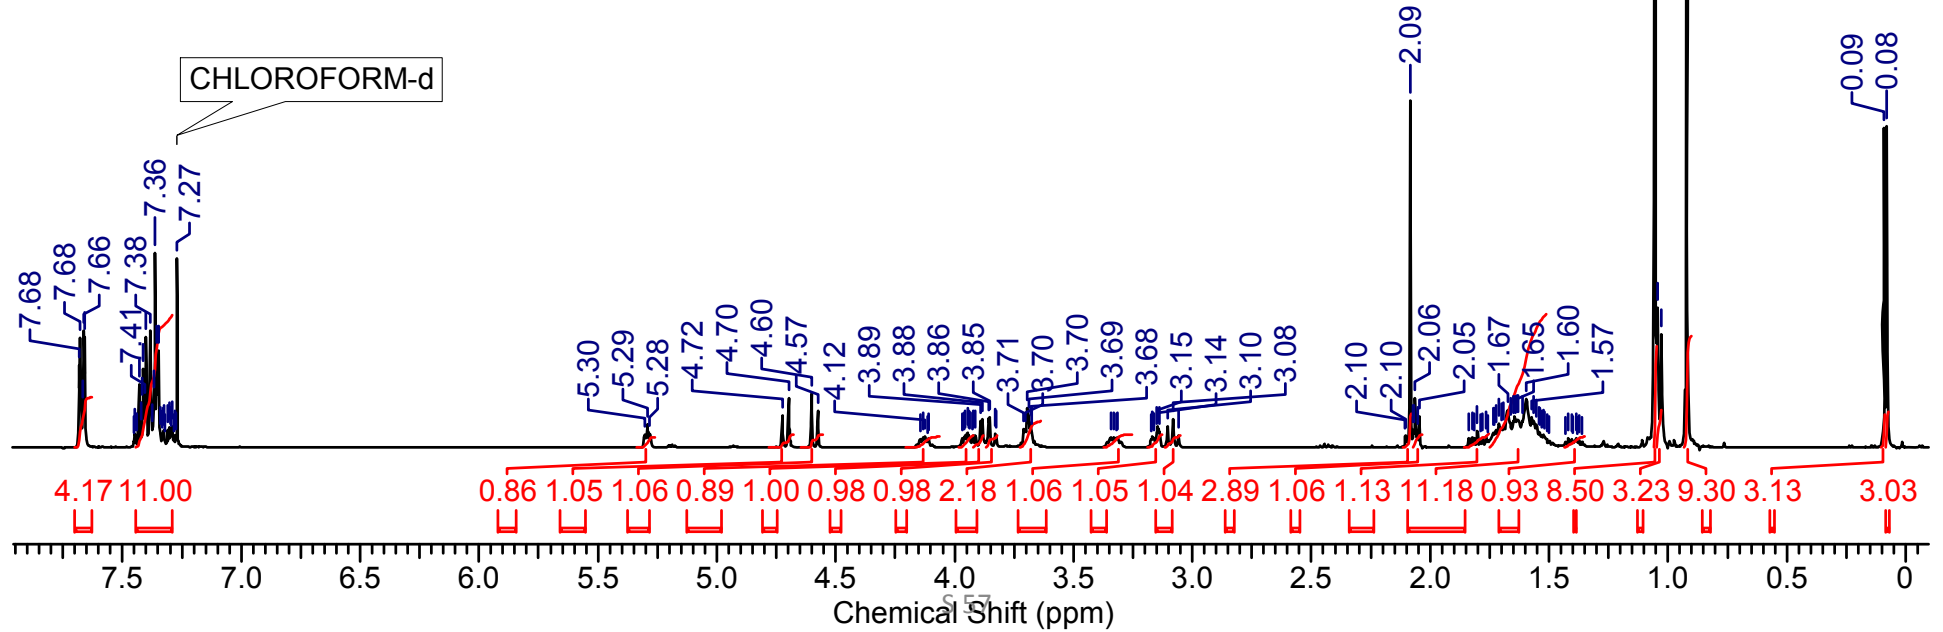

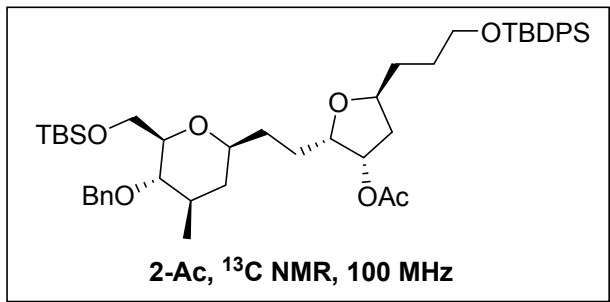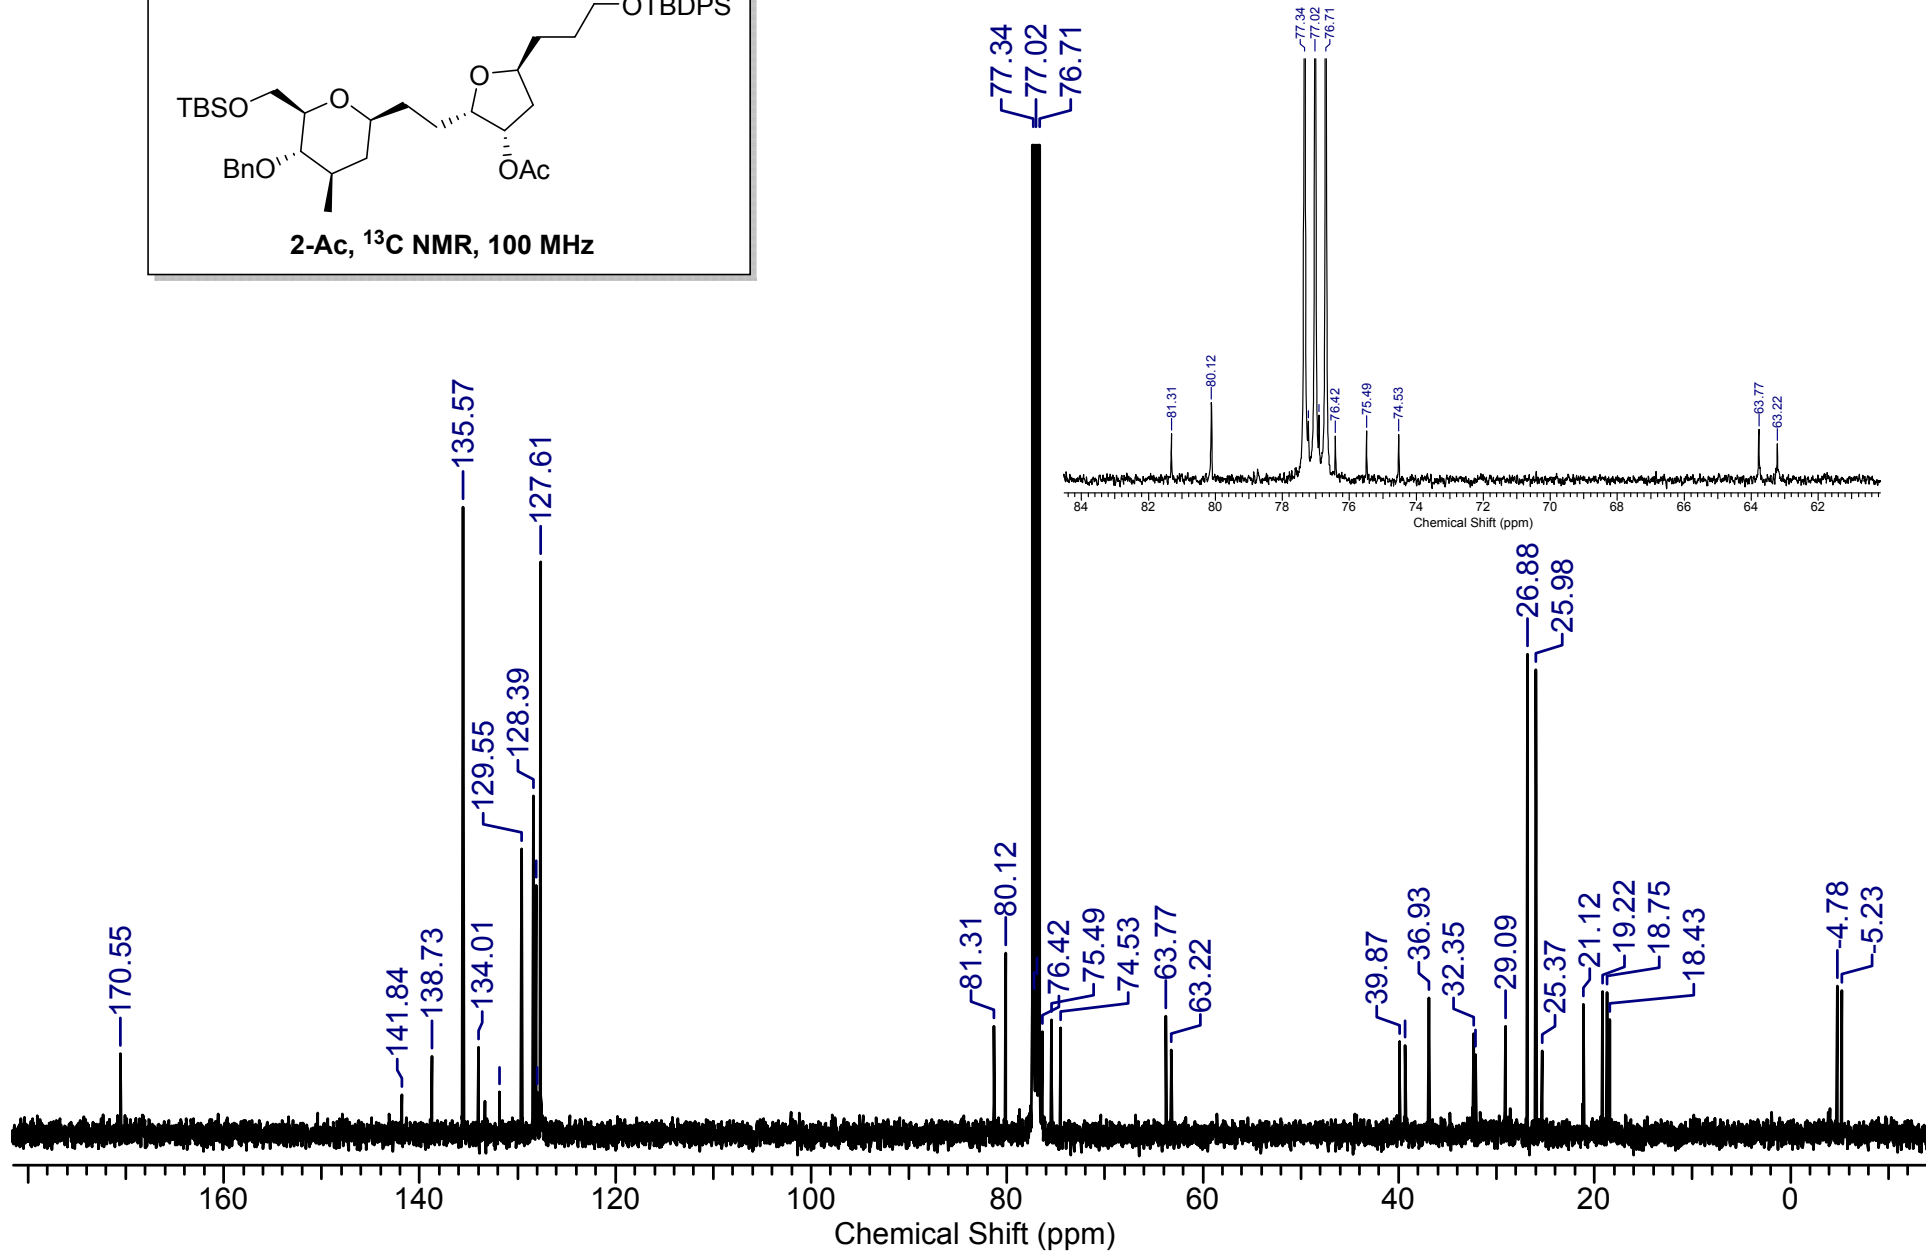

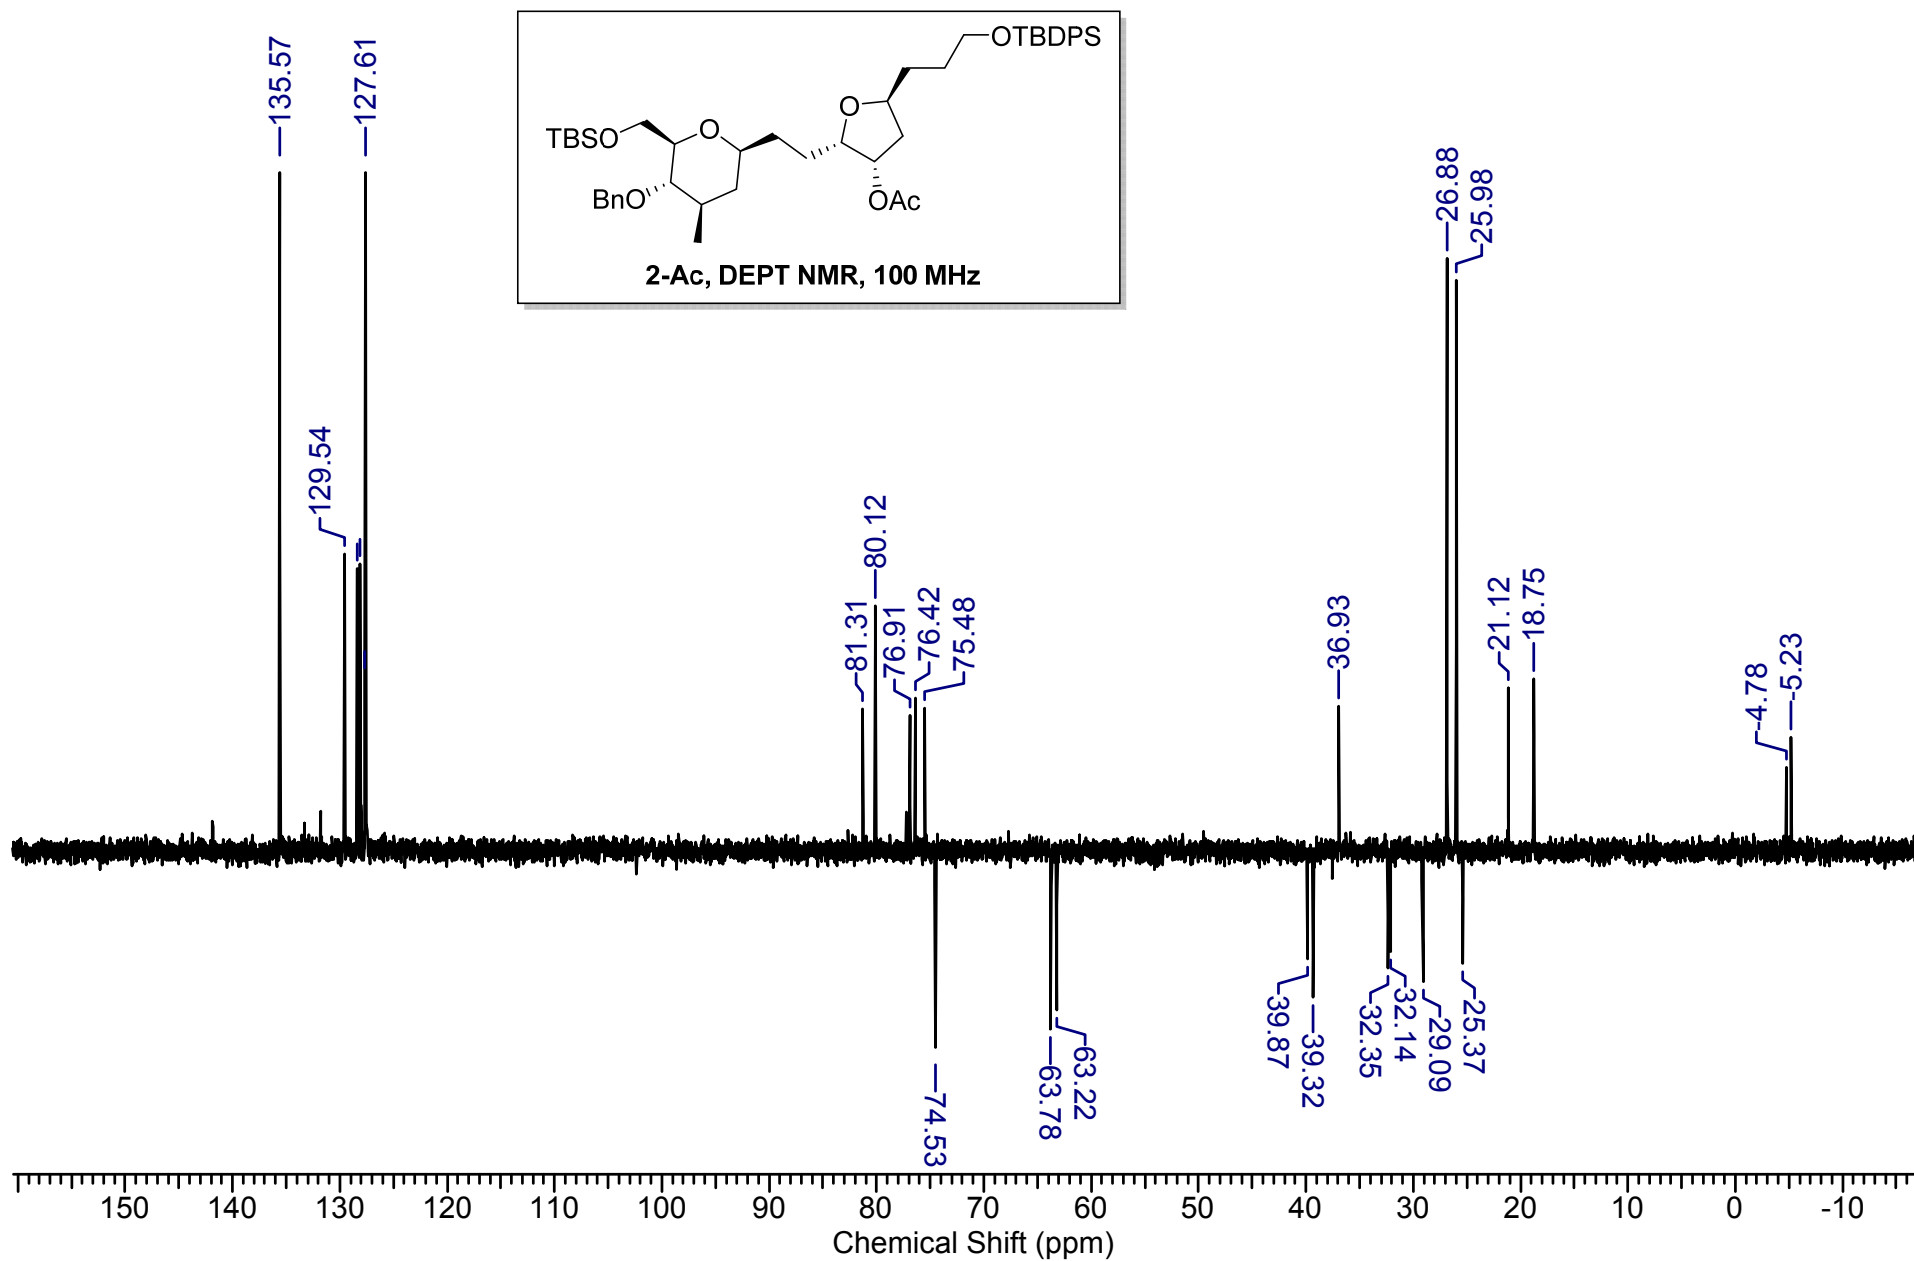

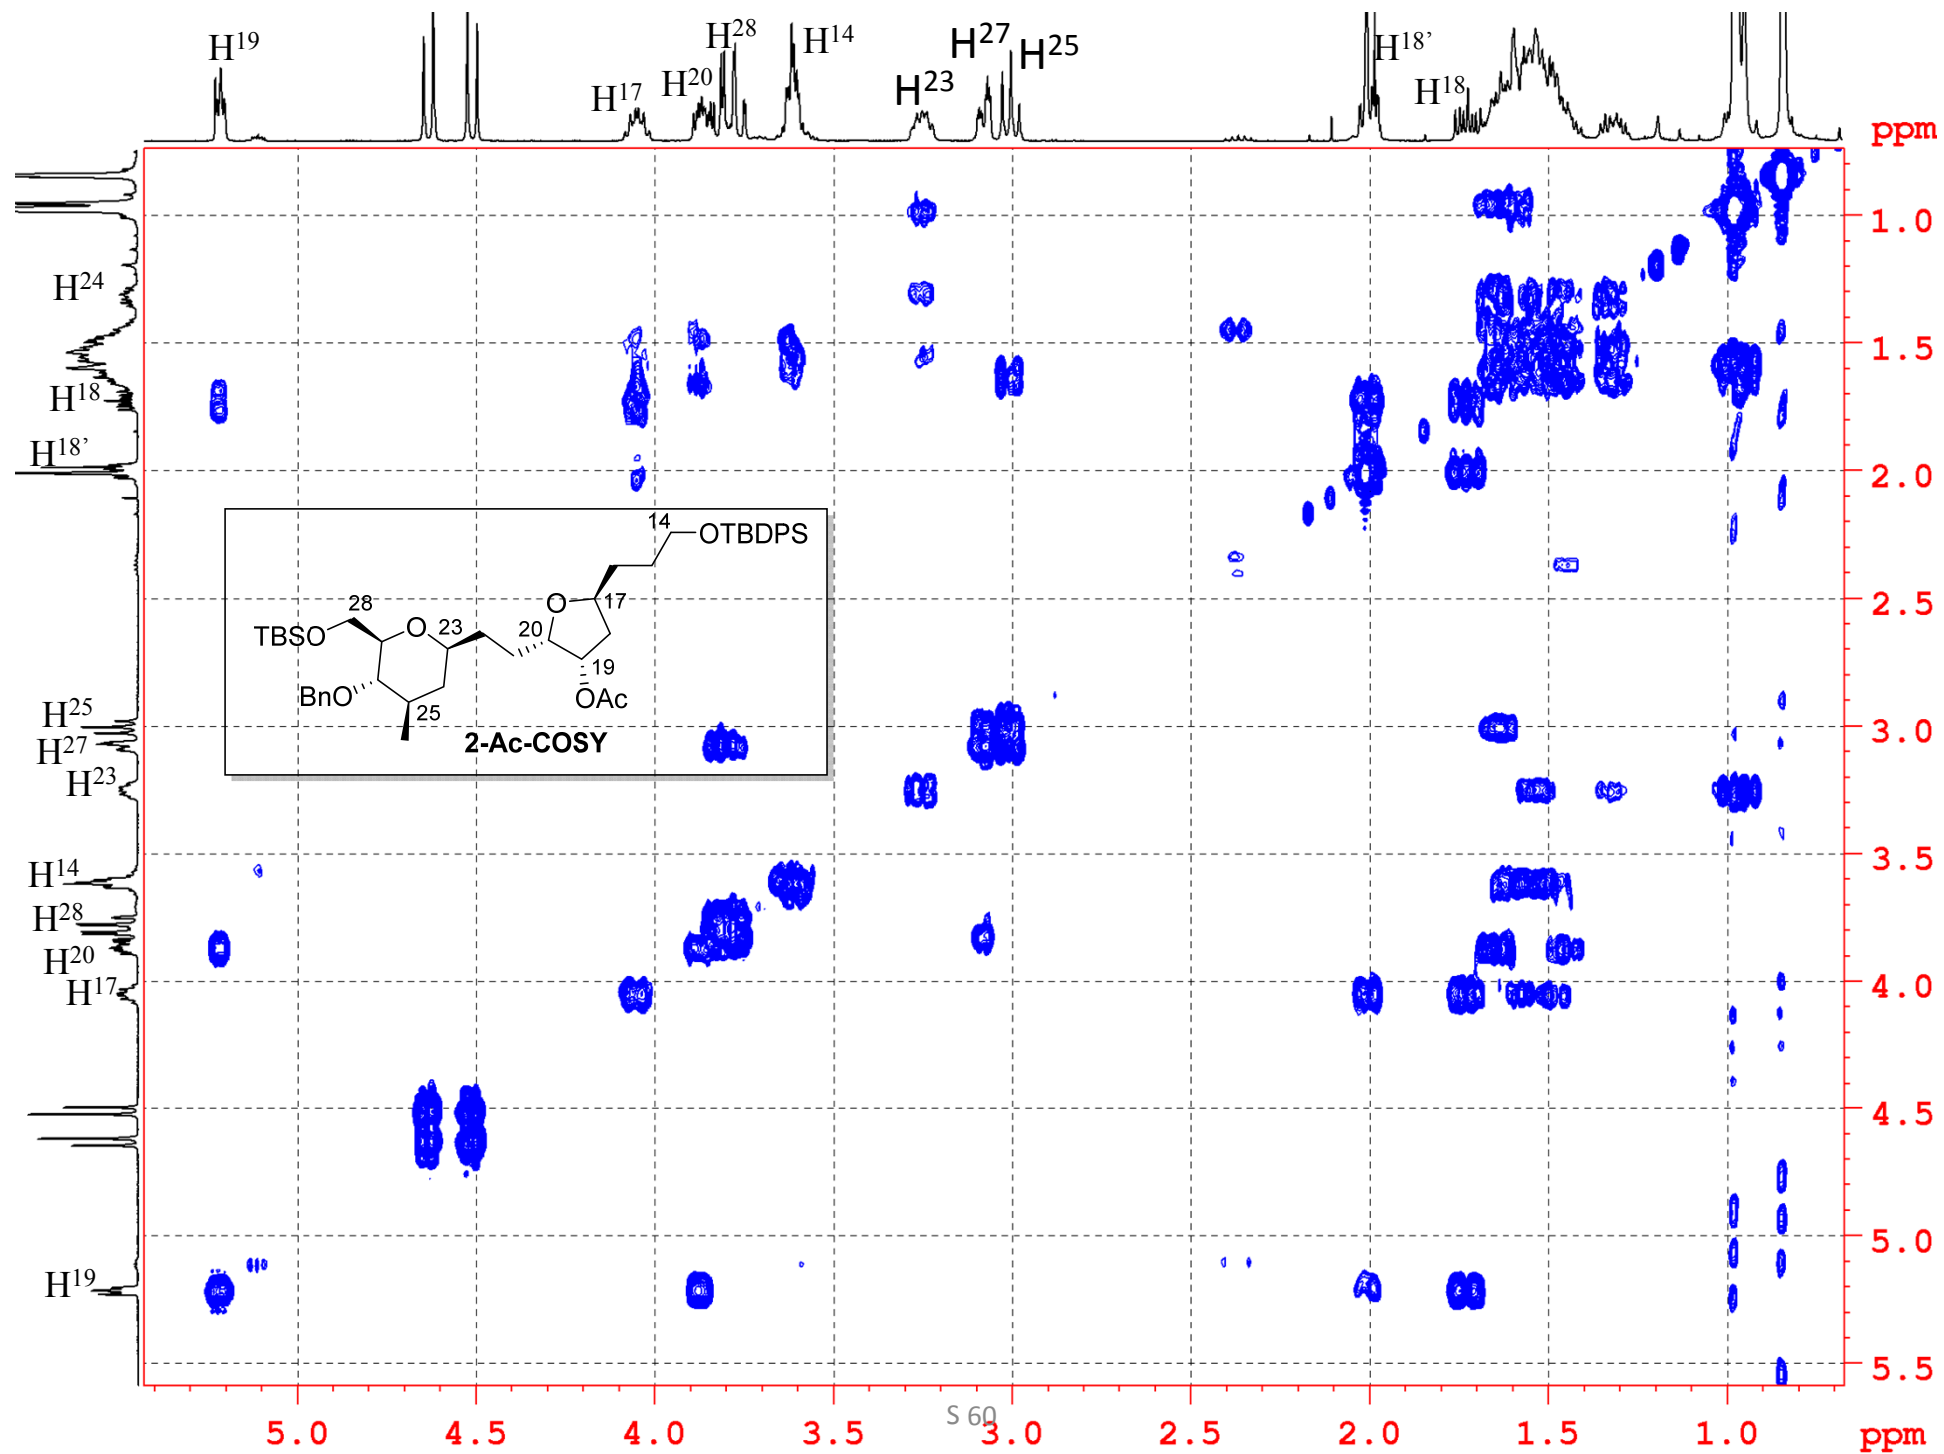

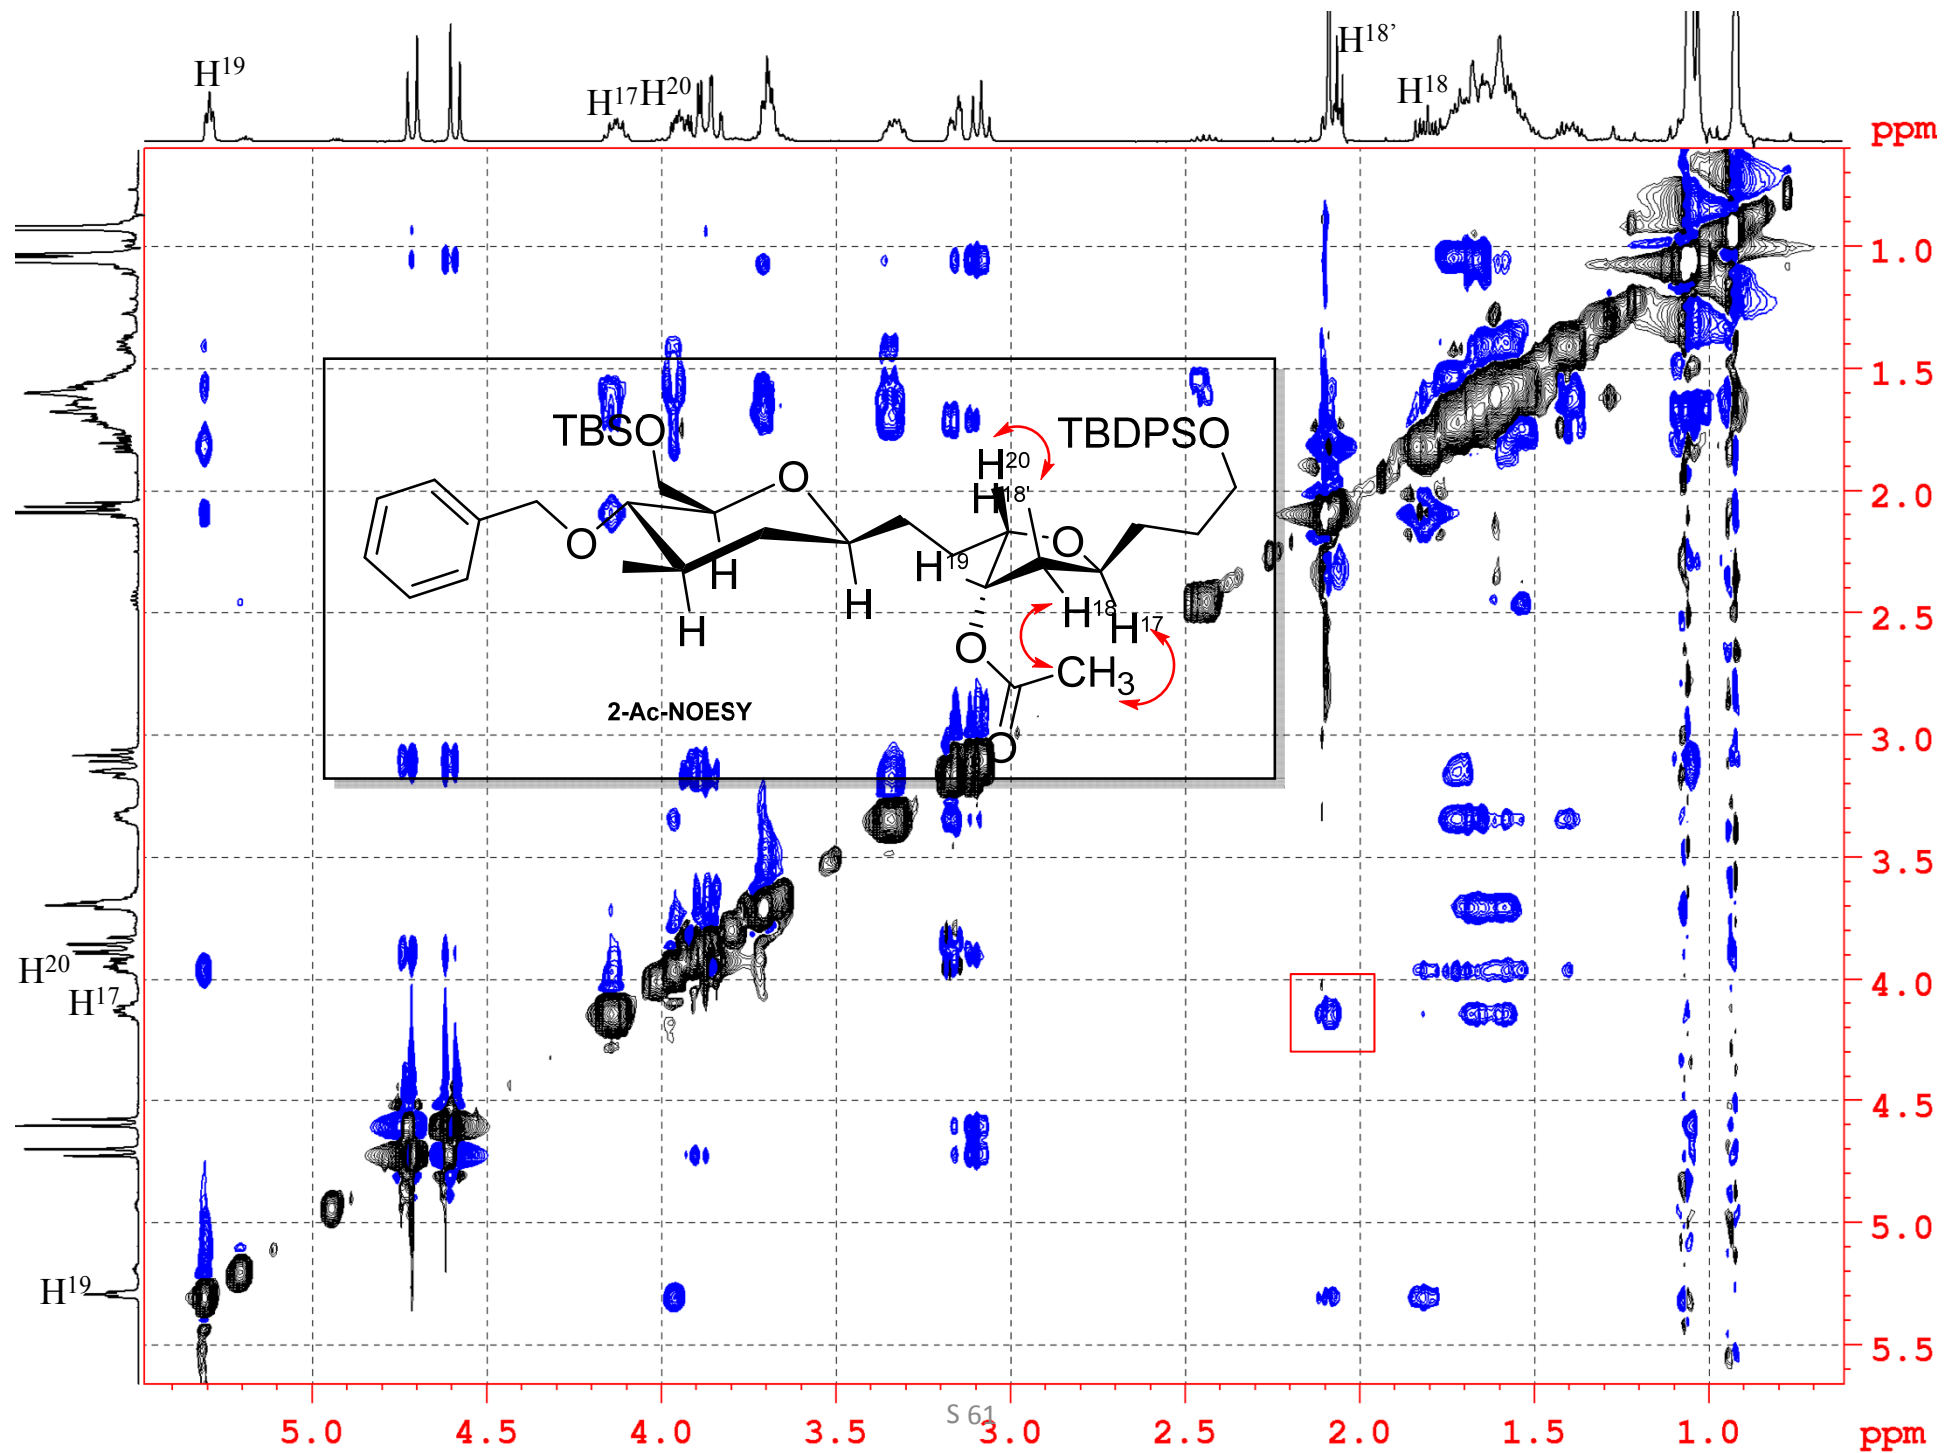

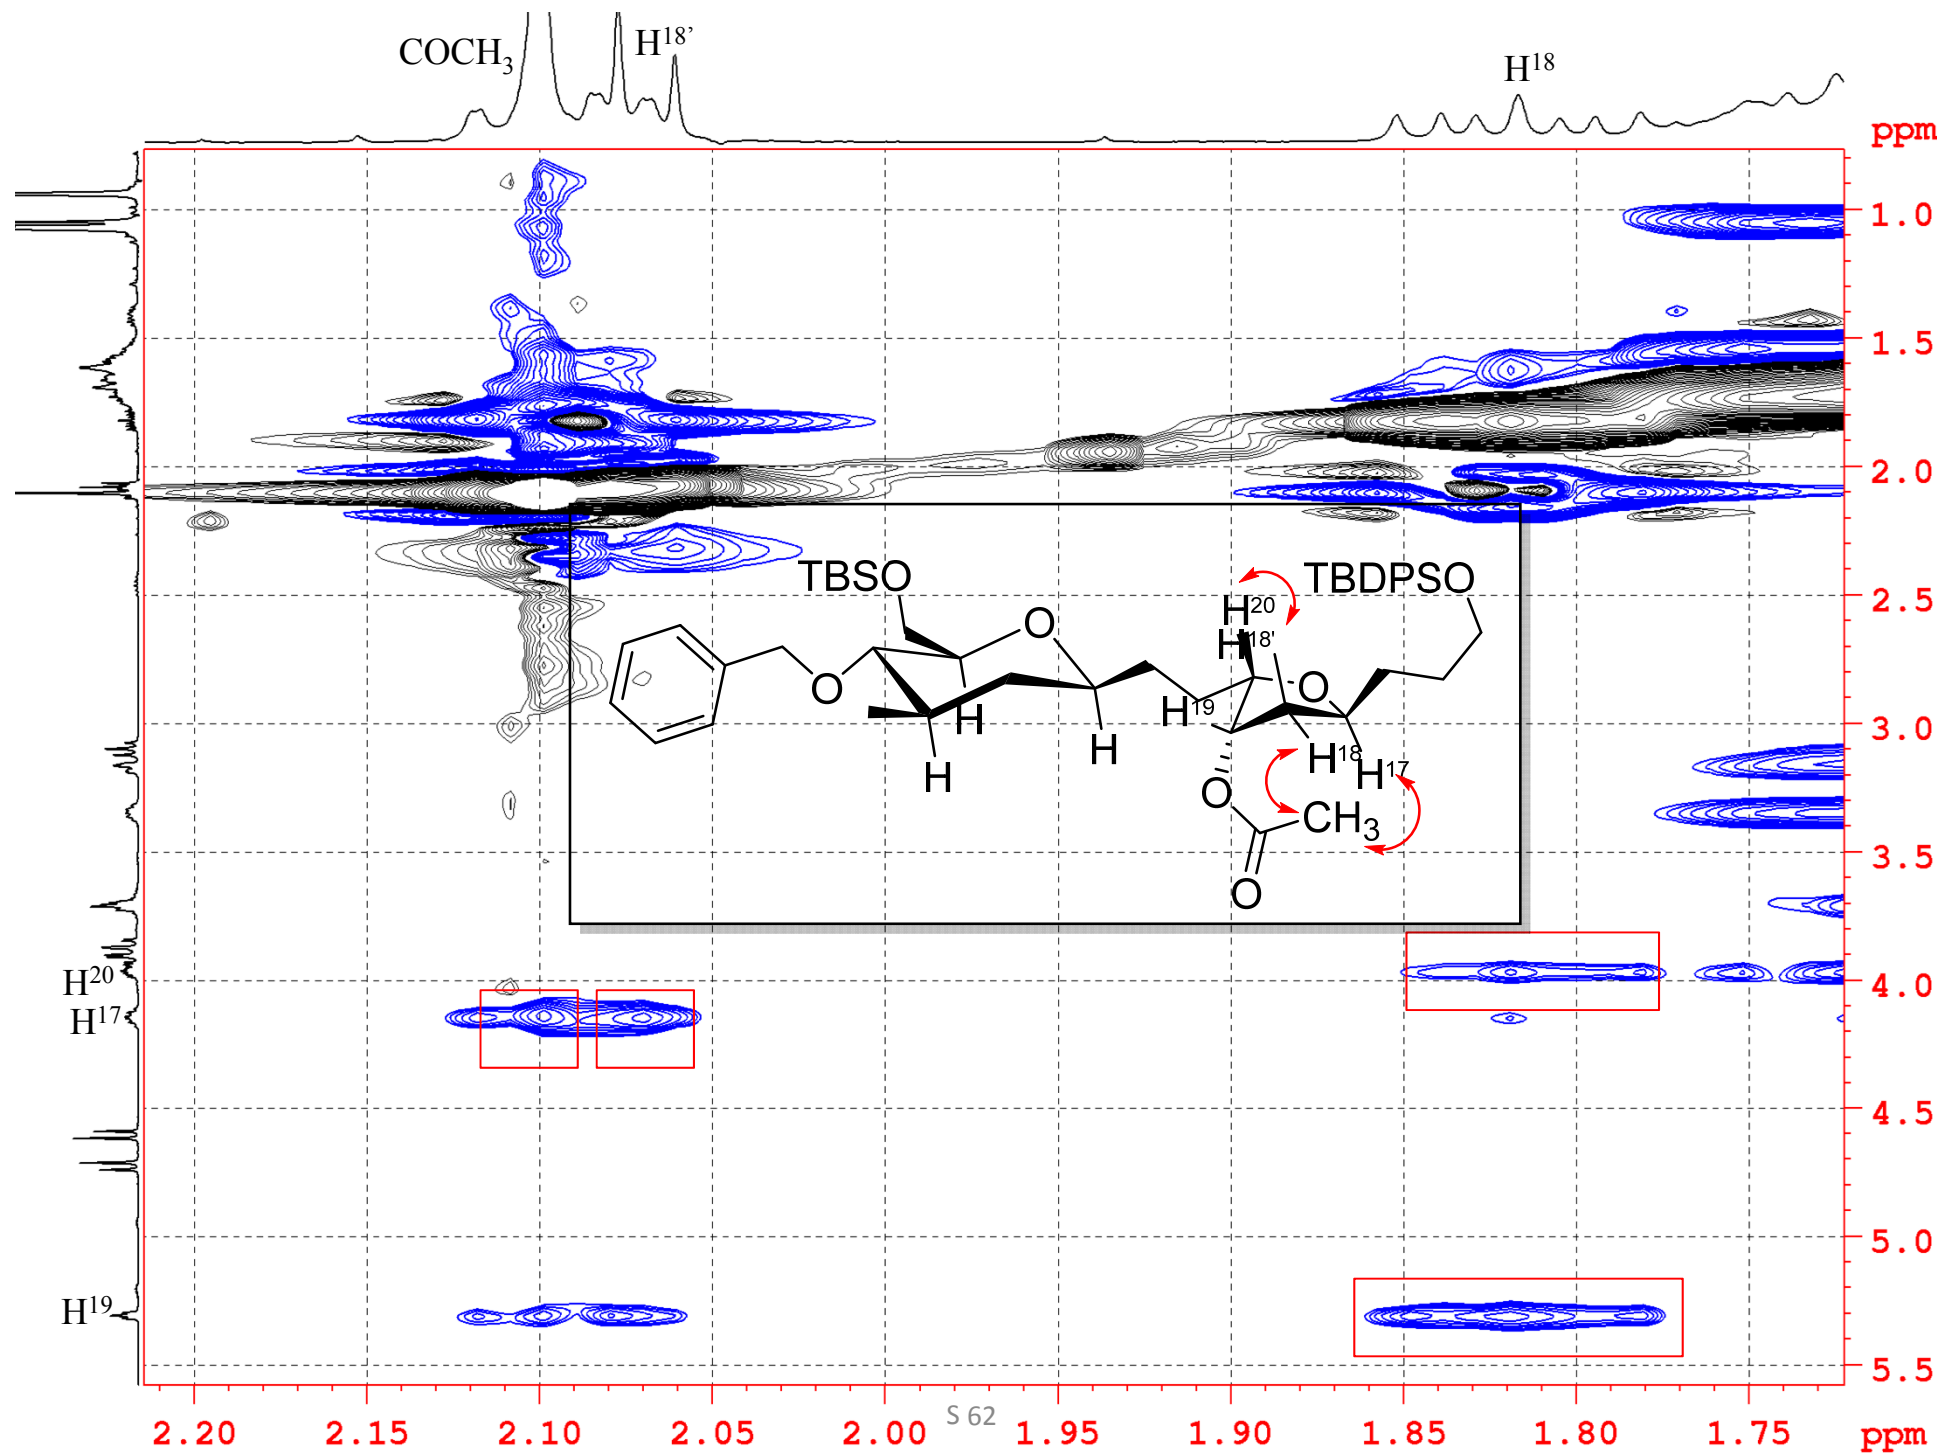

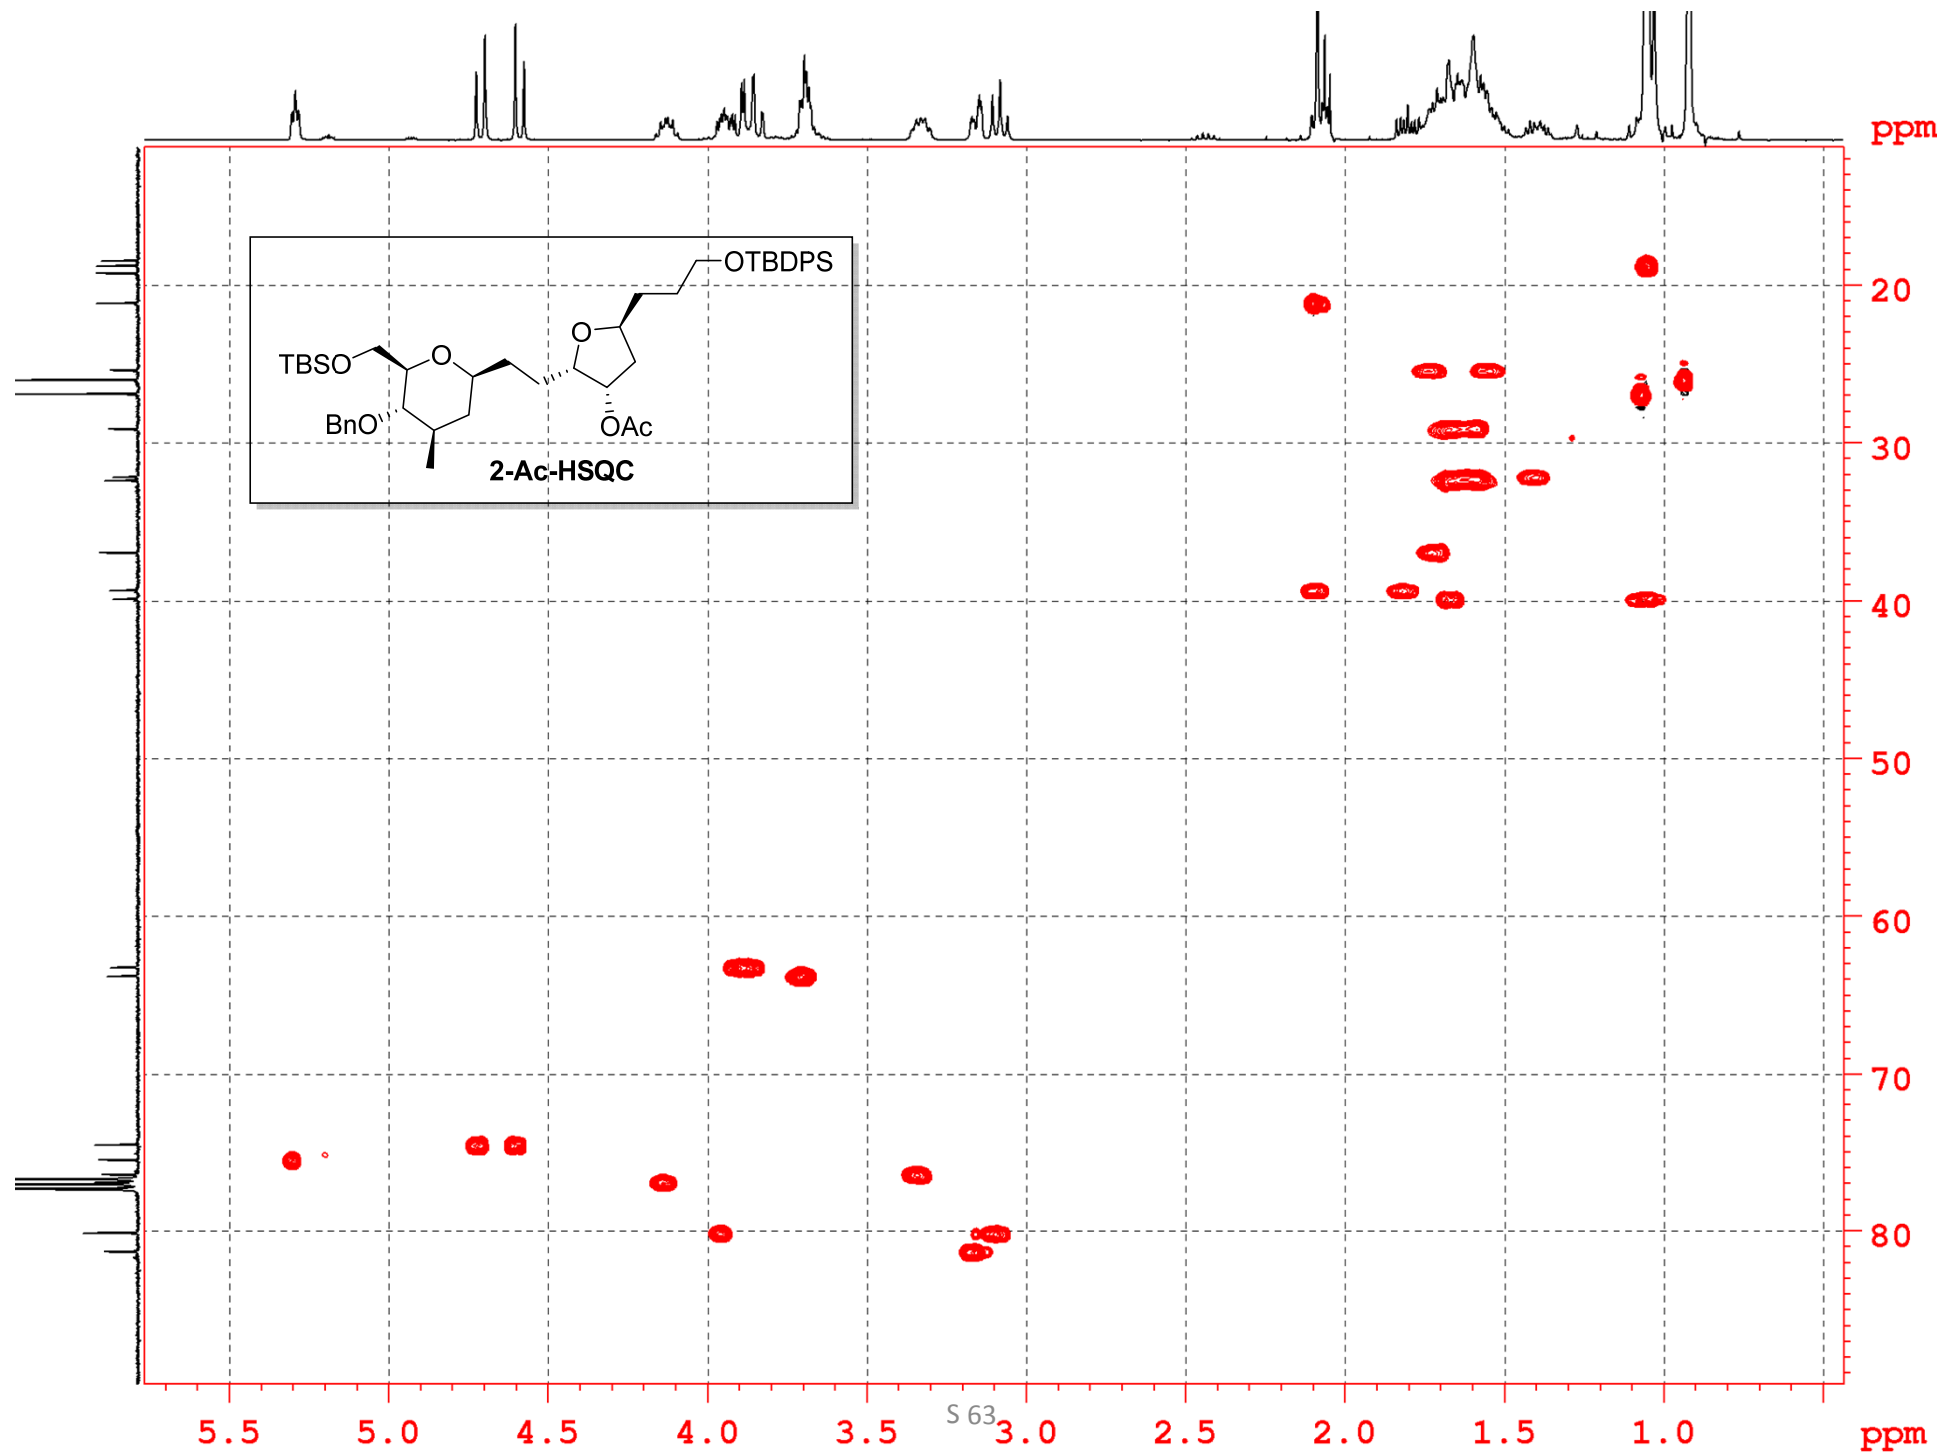

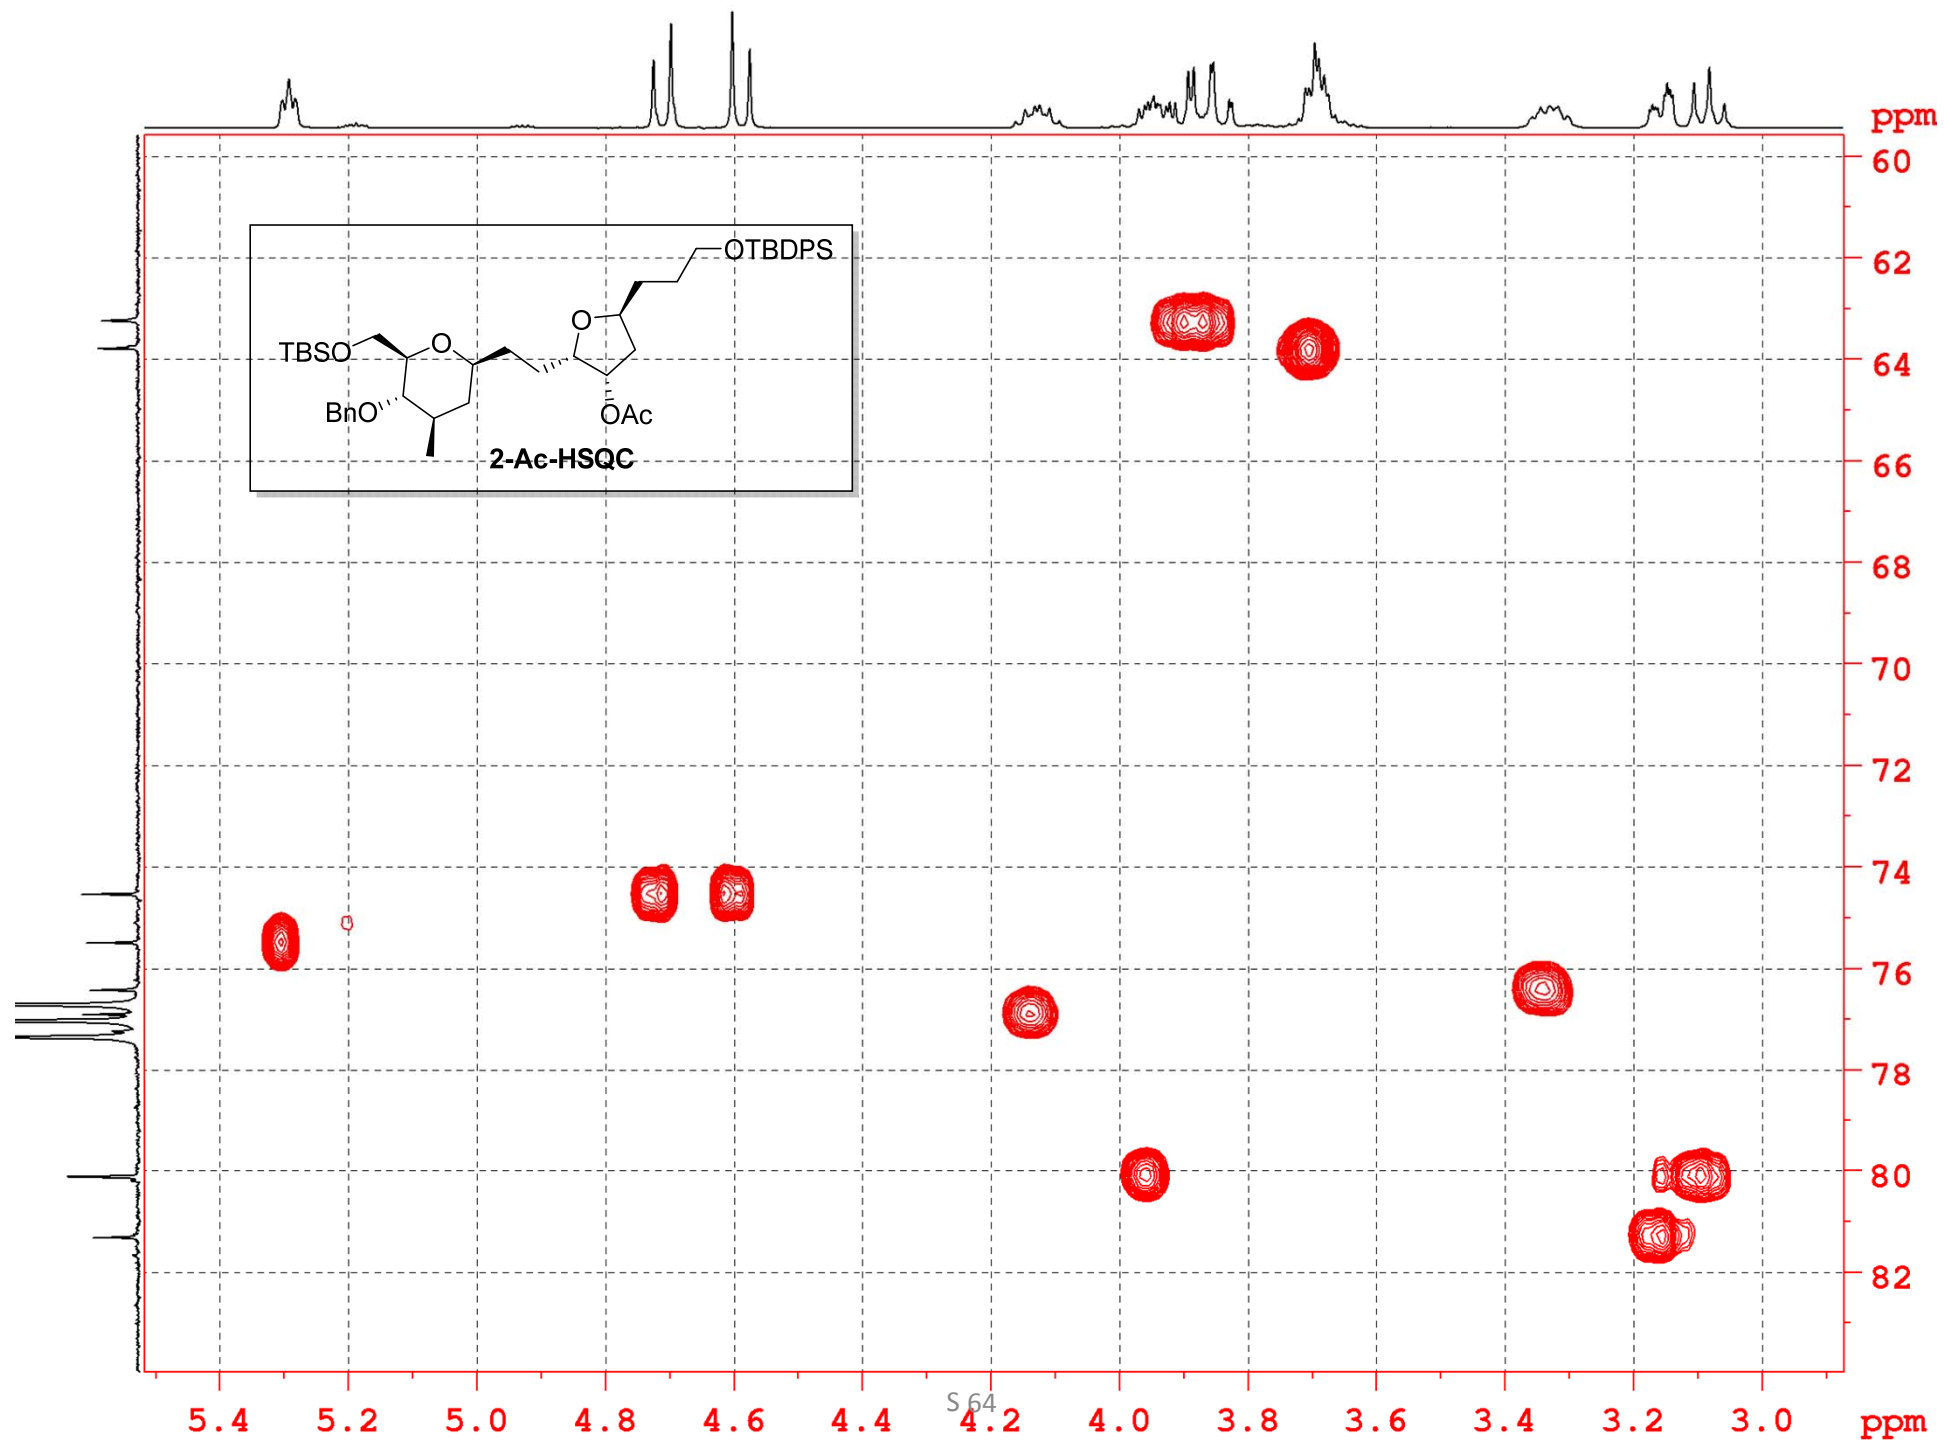



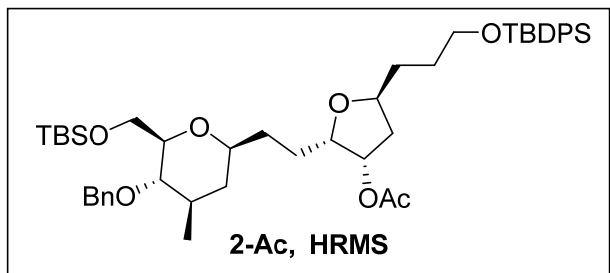

803.4734  
R=39607  
C<sub>47</sub> H<sub>71</sub> O<sub>7</sub> Si<sub>2</sub> = 803.4733  
0.1304 ppm

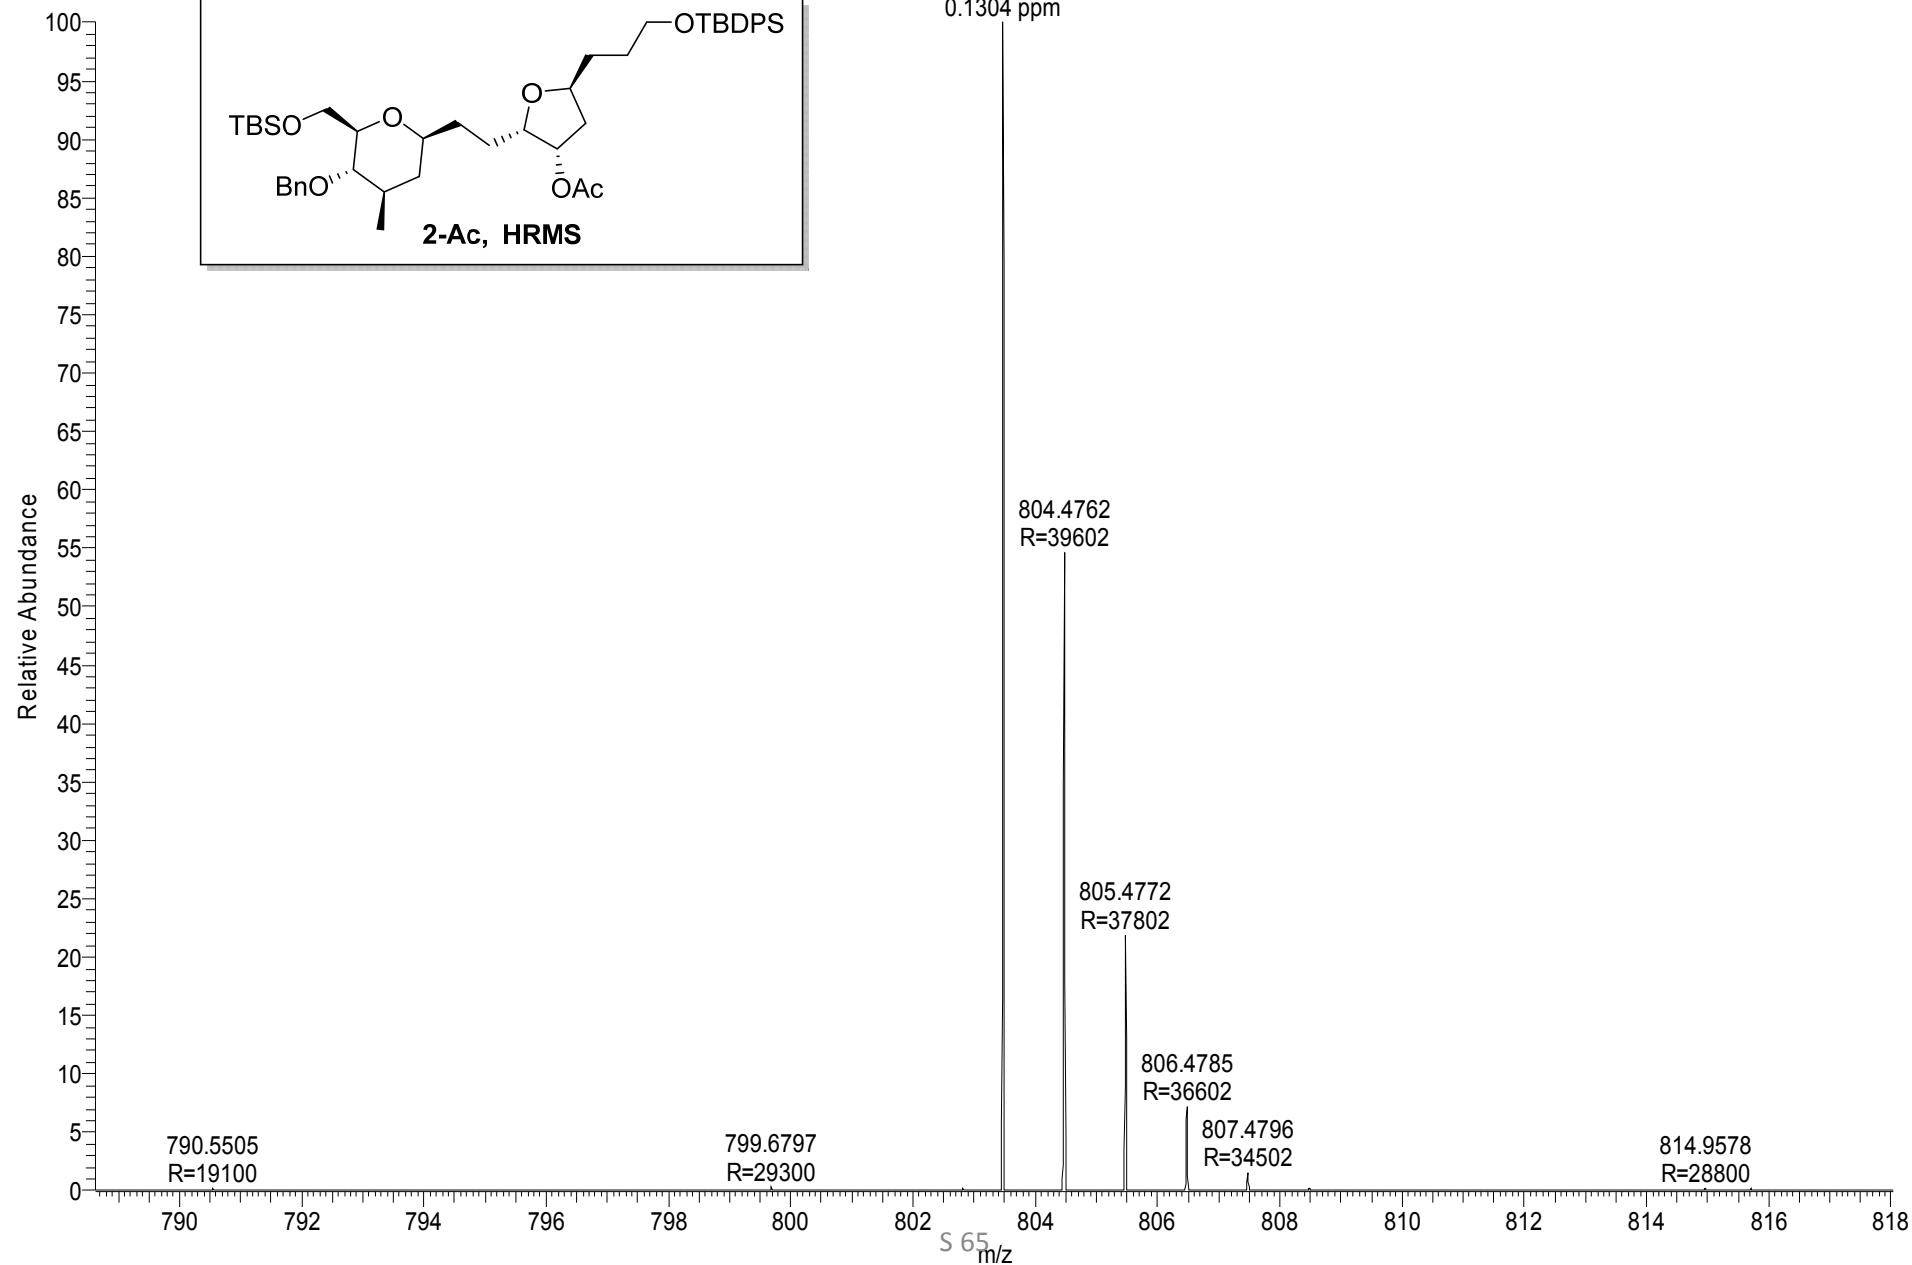

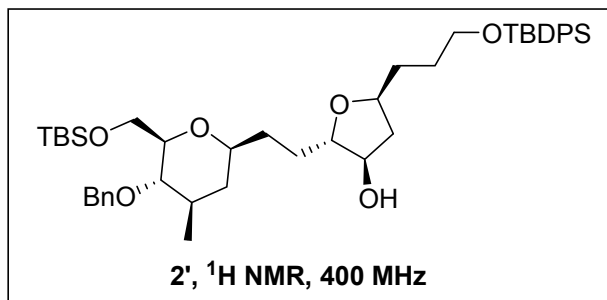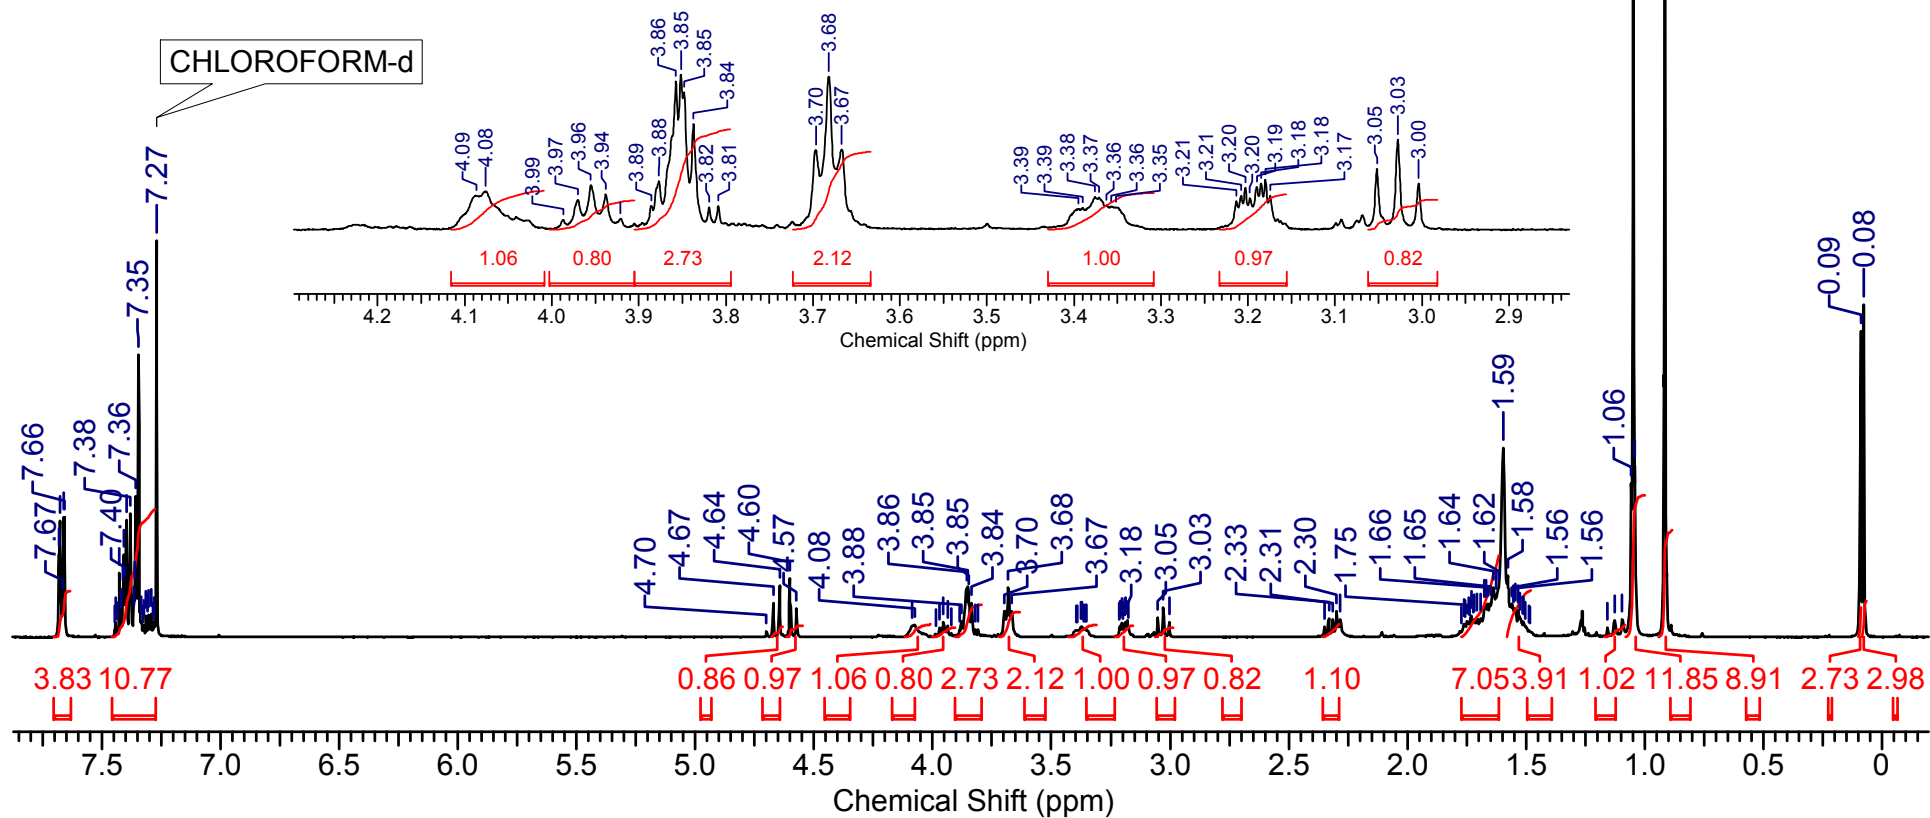

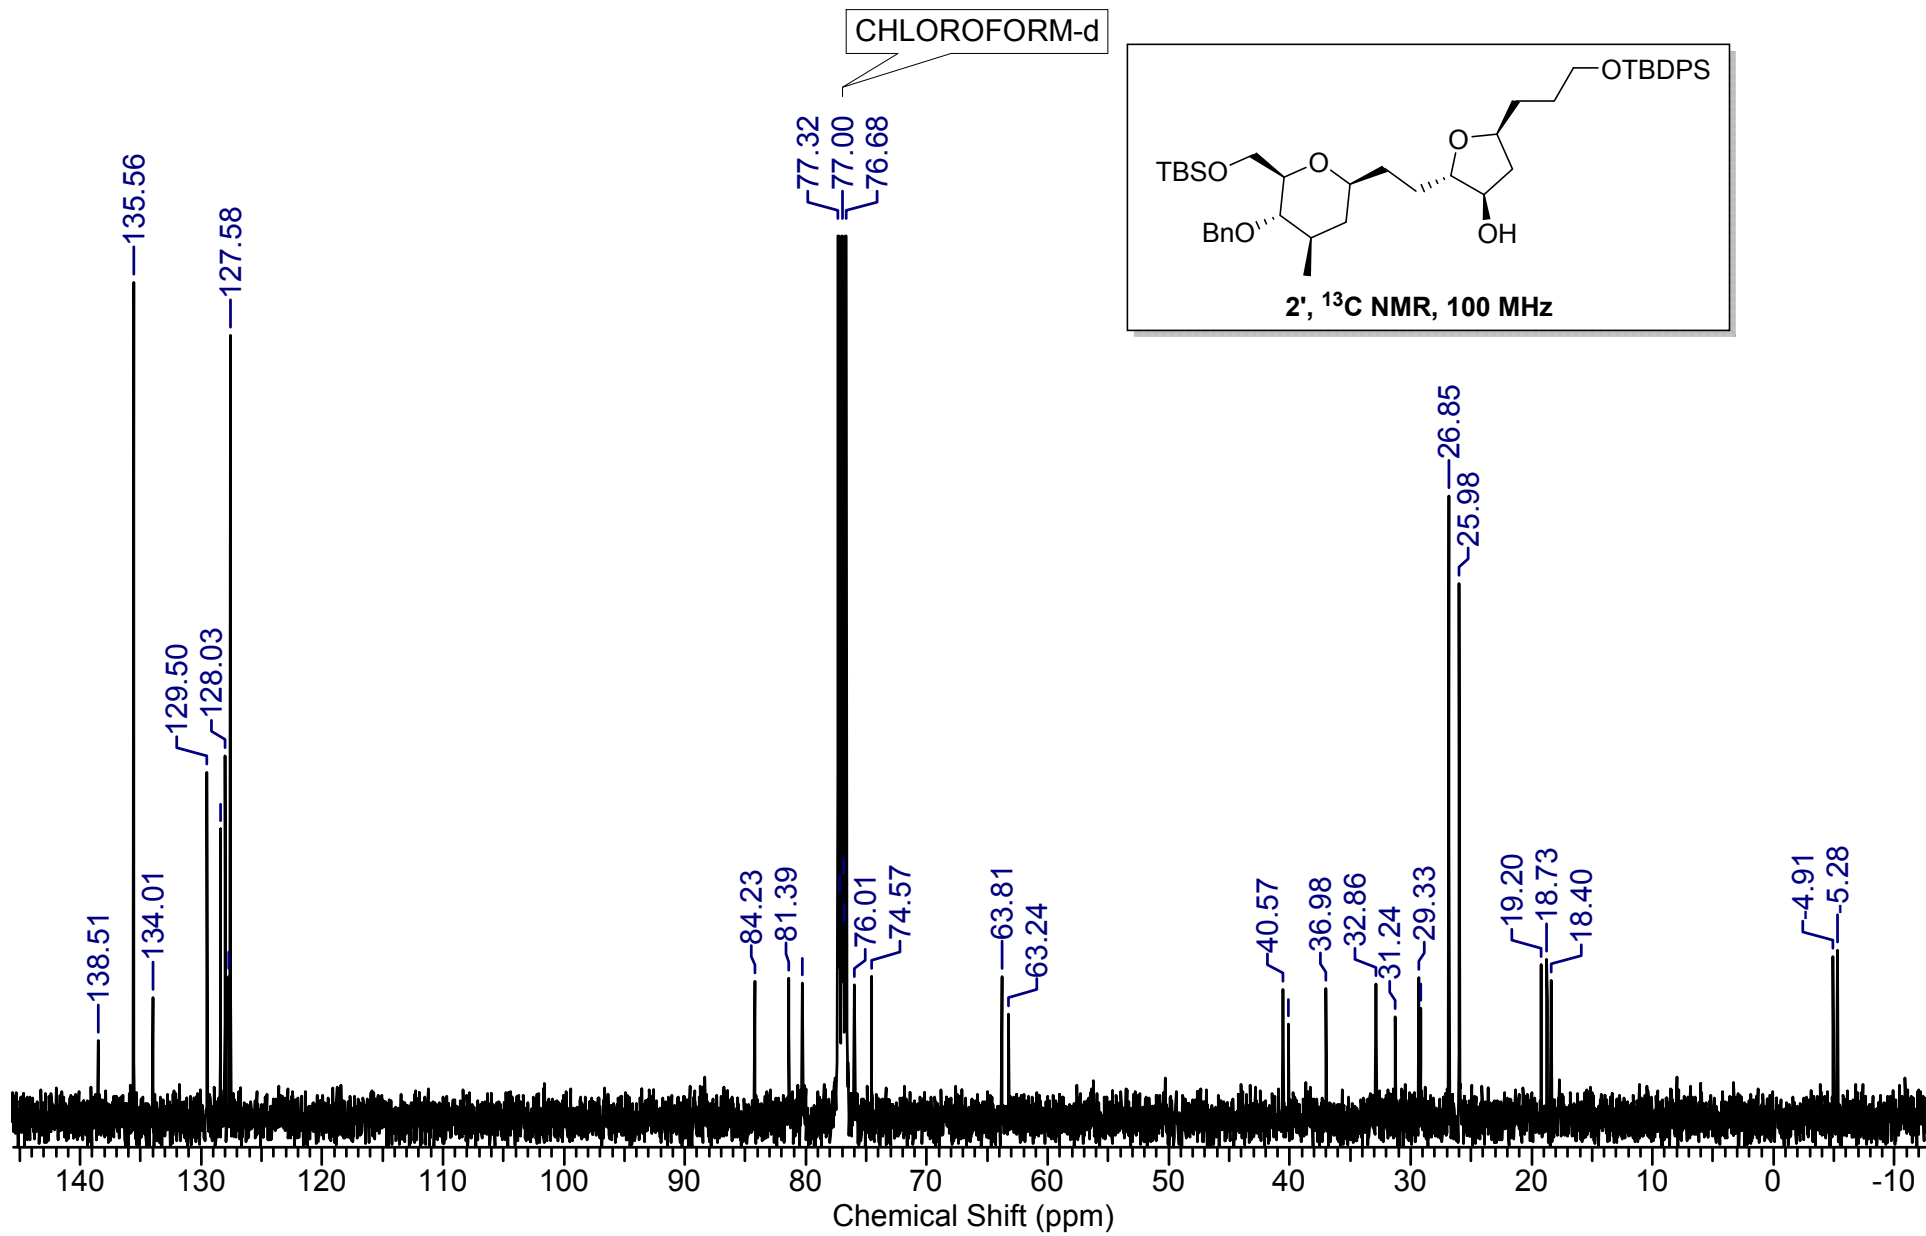

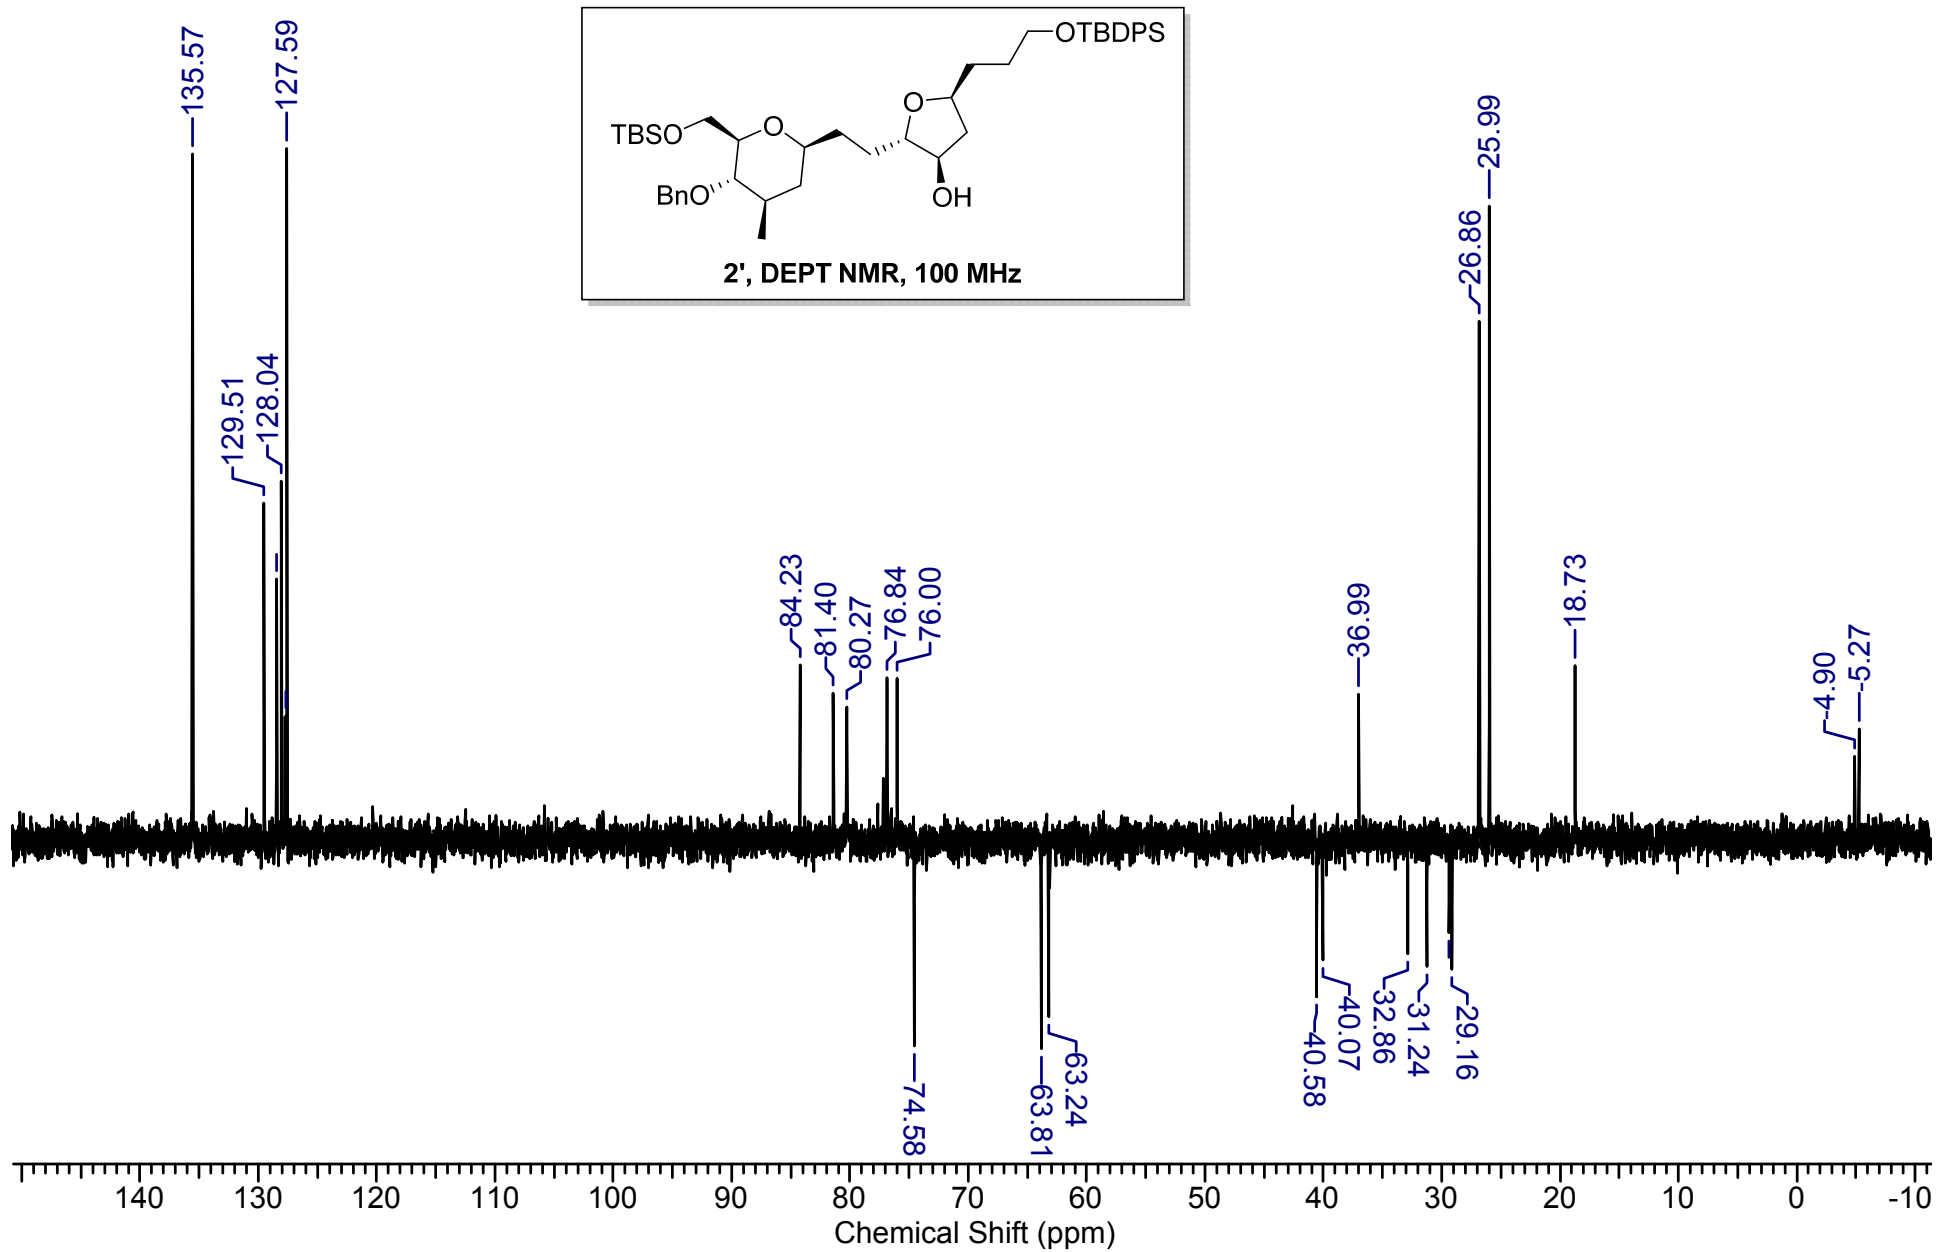

SS-3\_210108162157 #2269 RT: 13.62 AV: 1 NL: 7.31E7  
T: FTMS + p ESI Full ms [100.0000-1500.0000]

761.4623  
R=41107  
C<sub>45</sub>H<sub>69</sub>O<sub>6</sub>Si<sub>2</sub> = 761.4627  
-0.4964 ppm

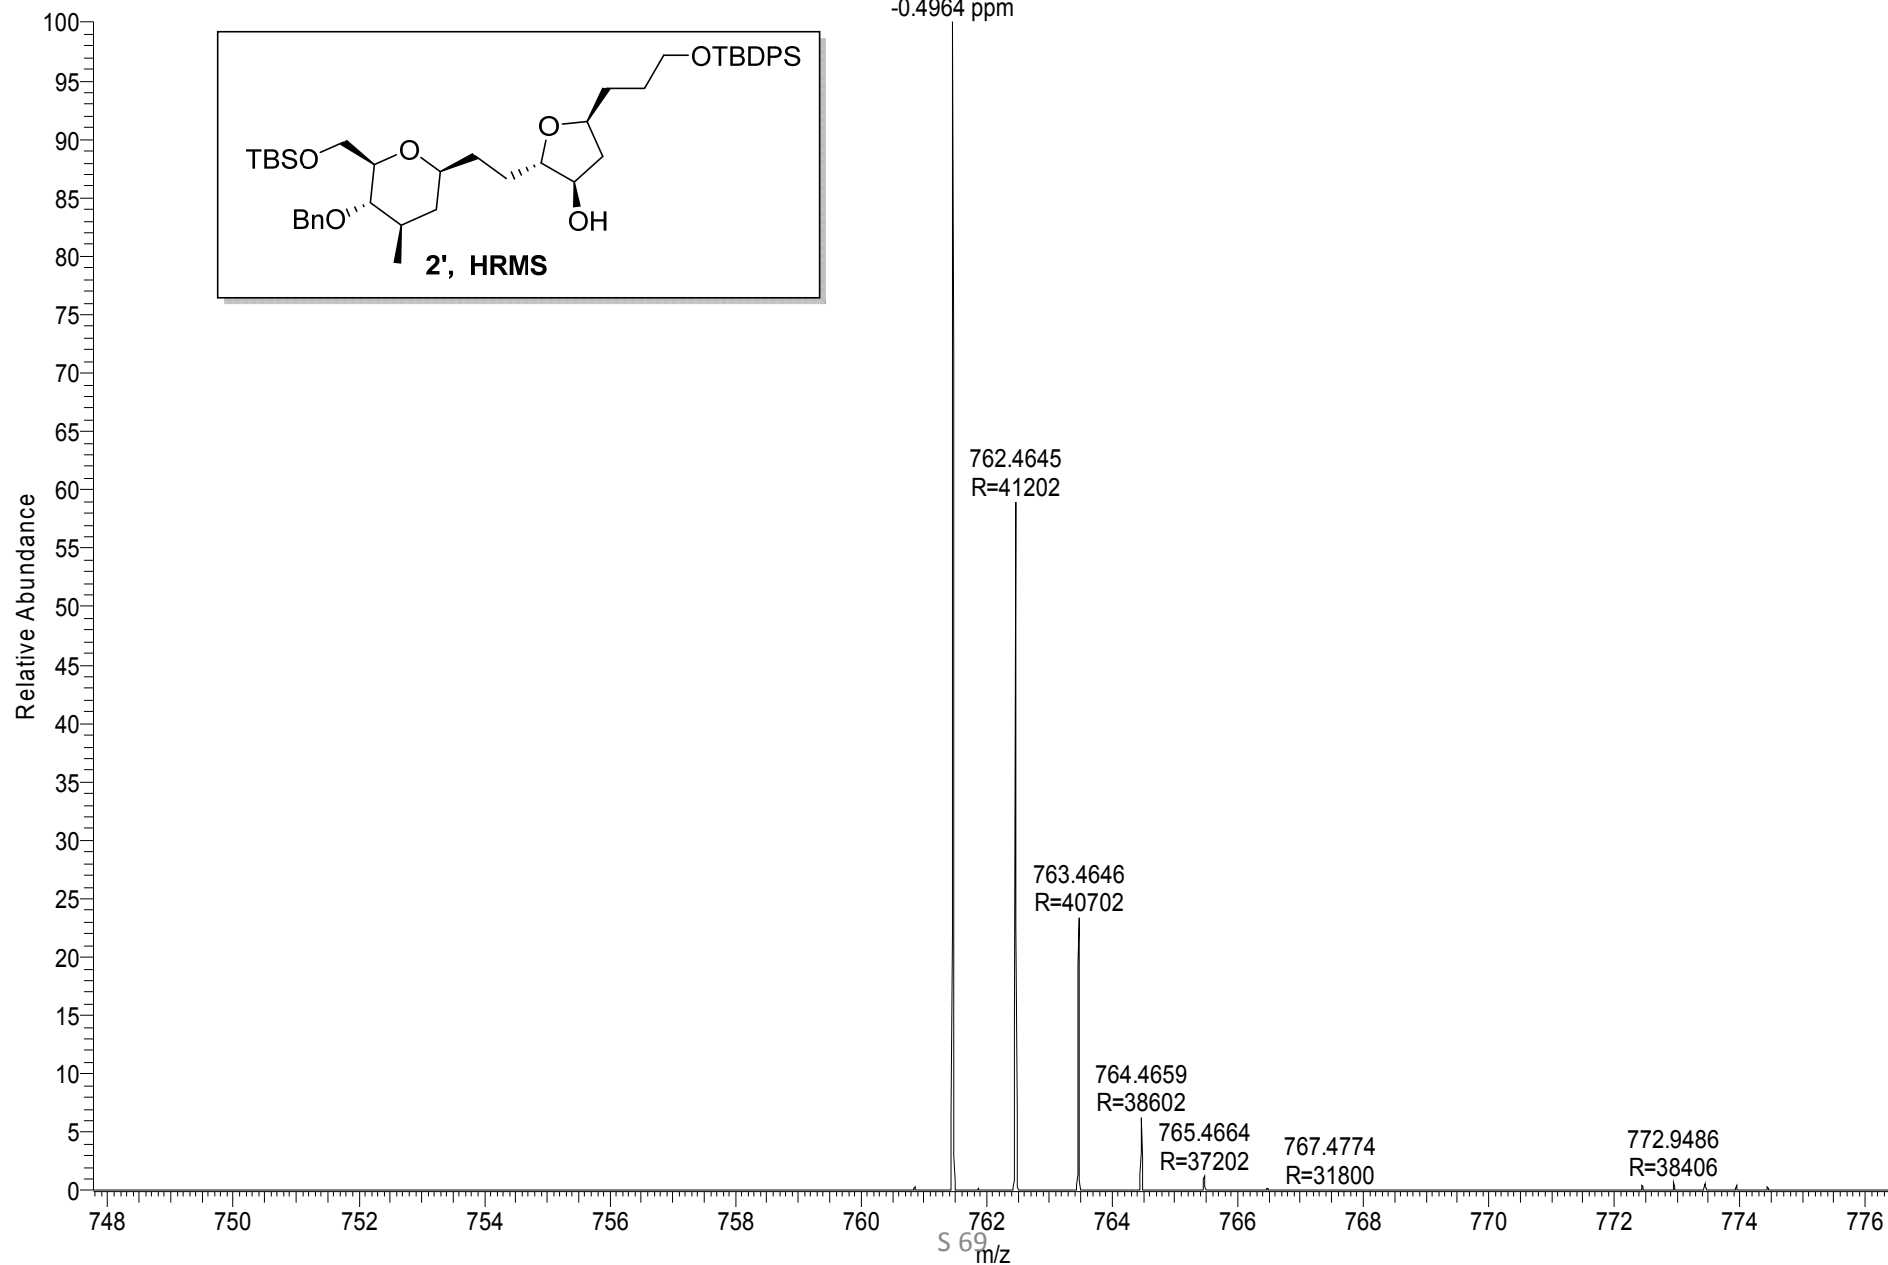

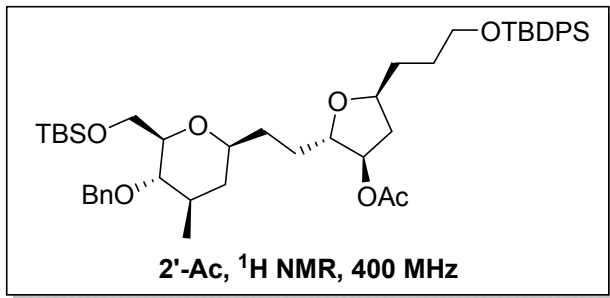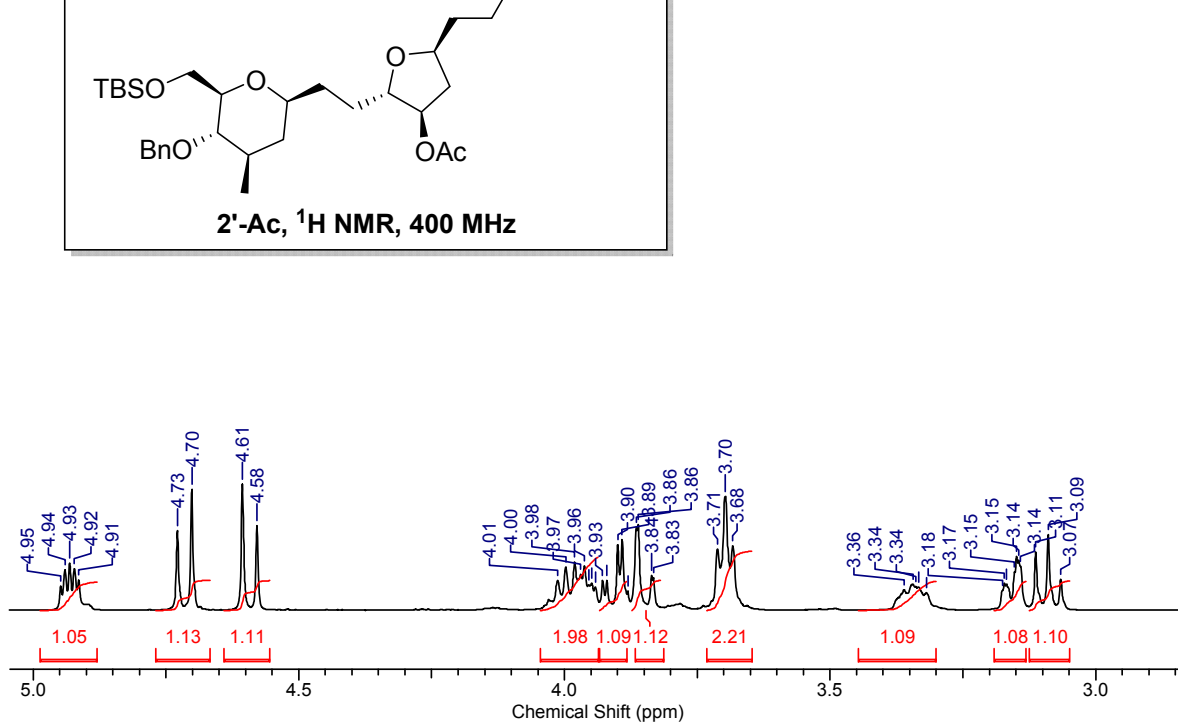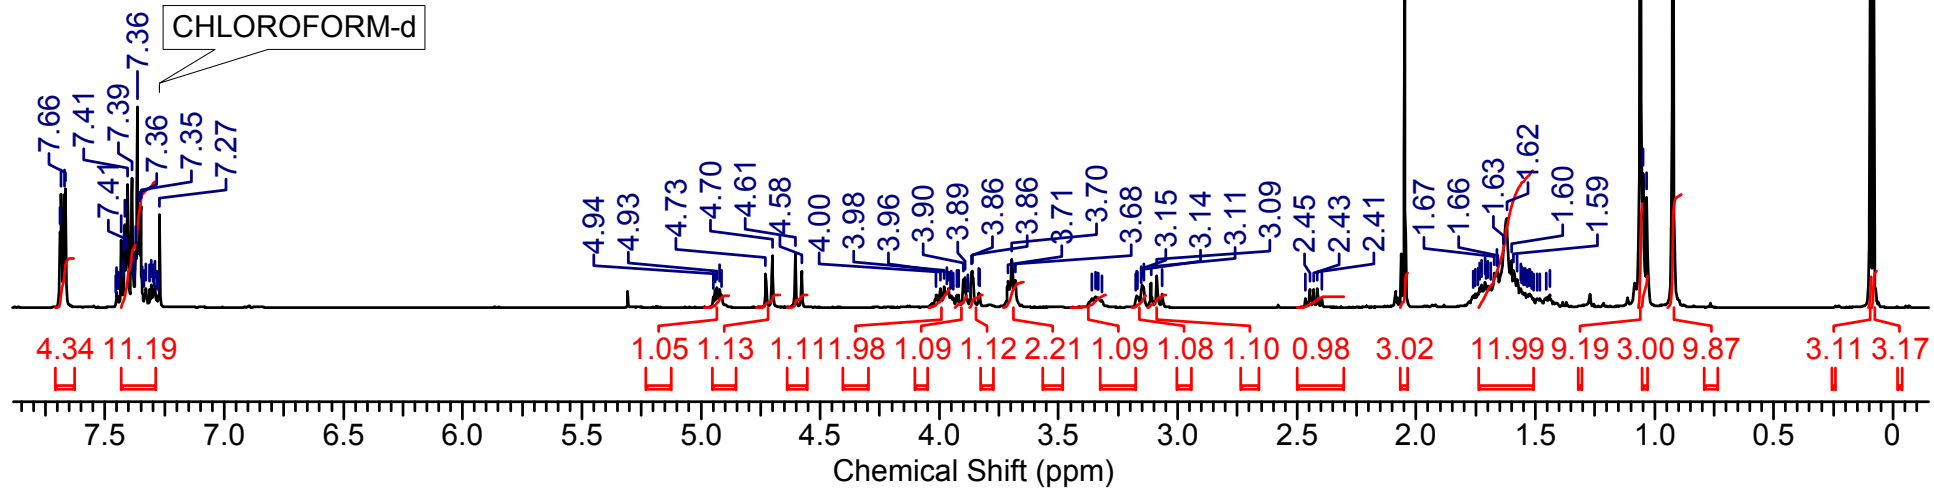

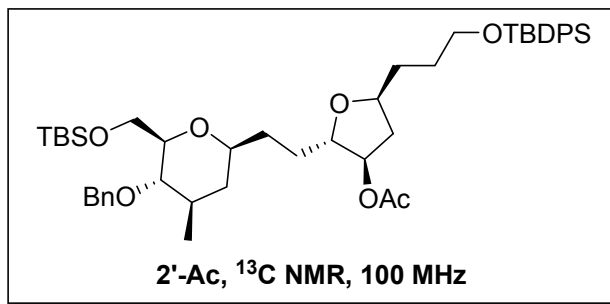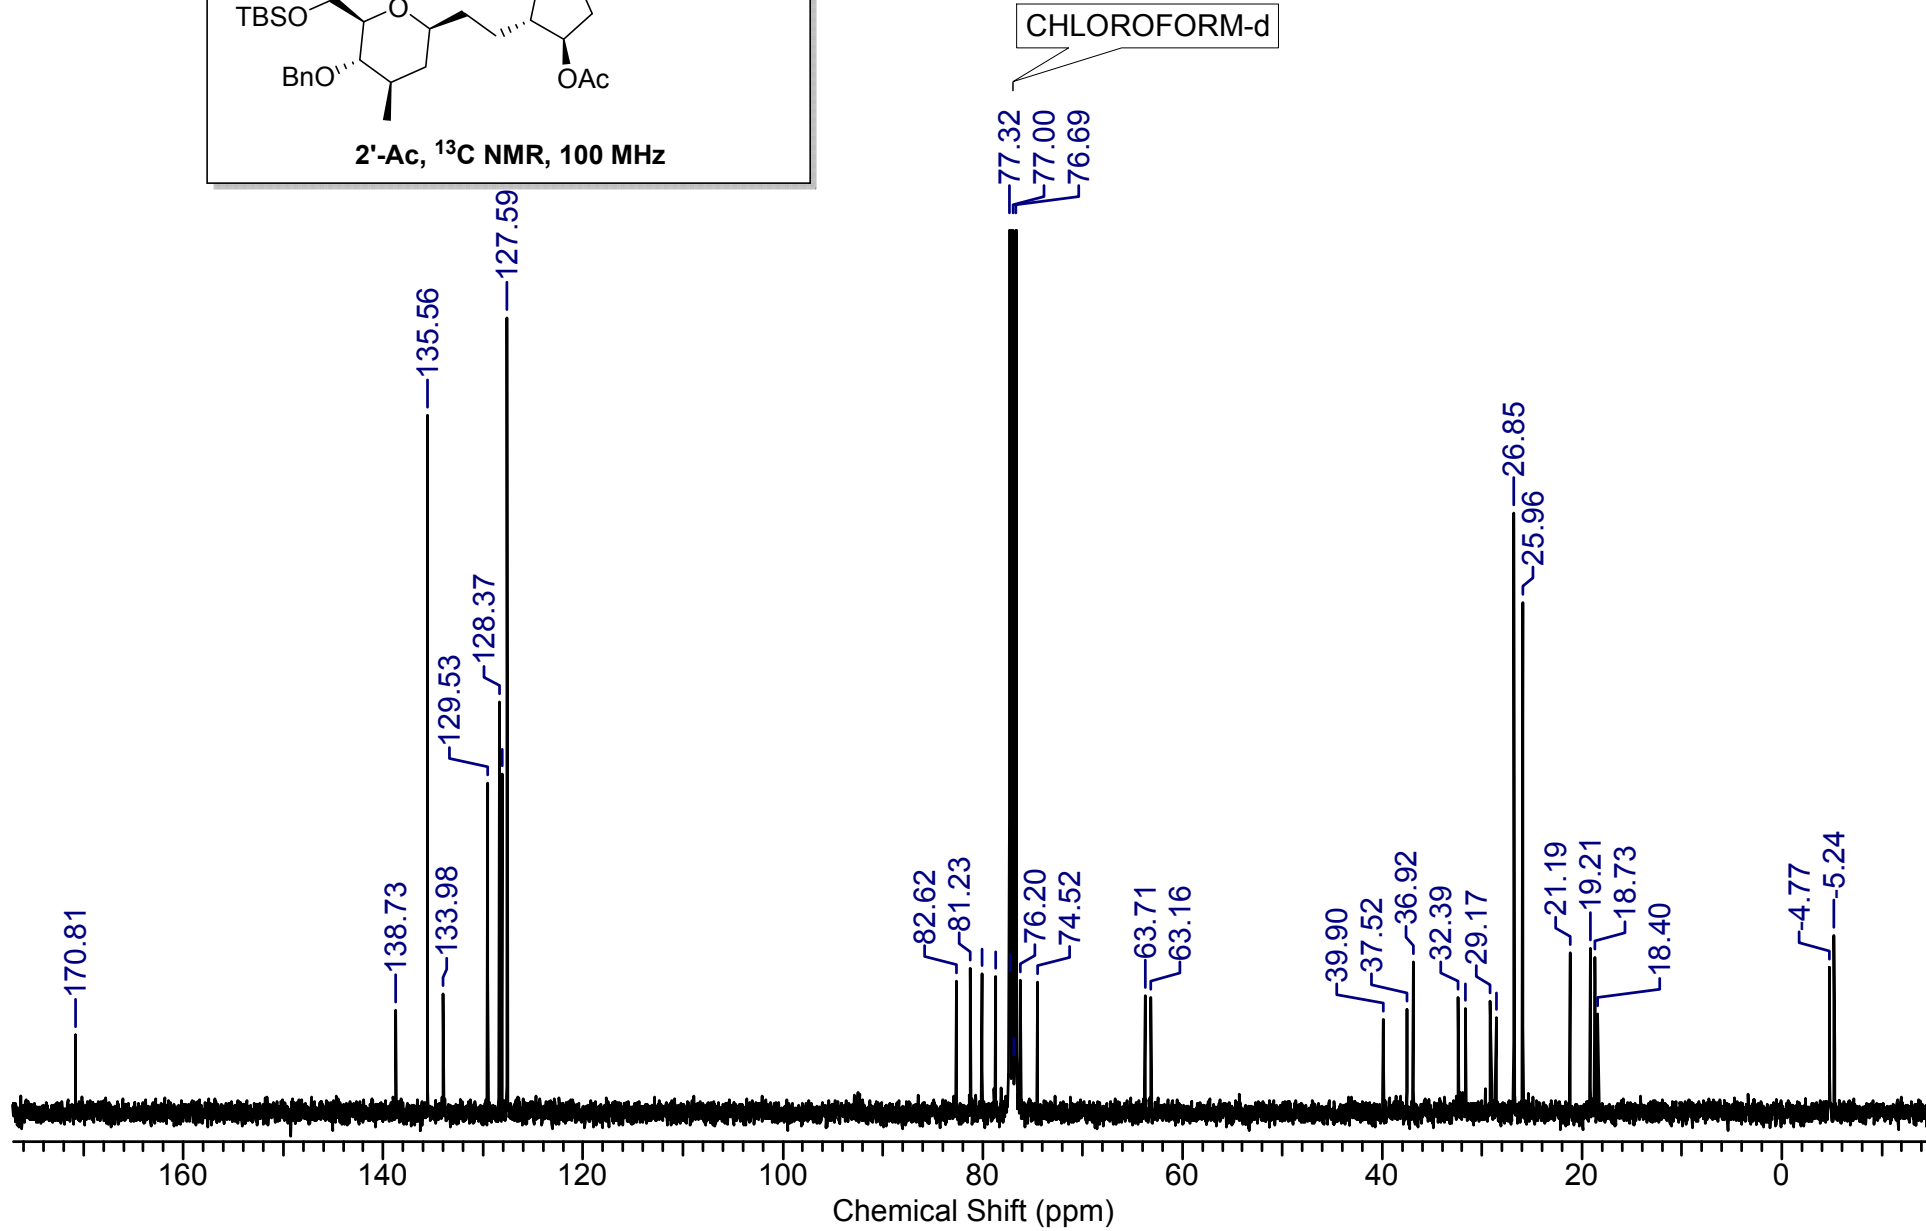

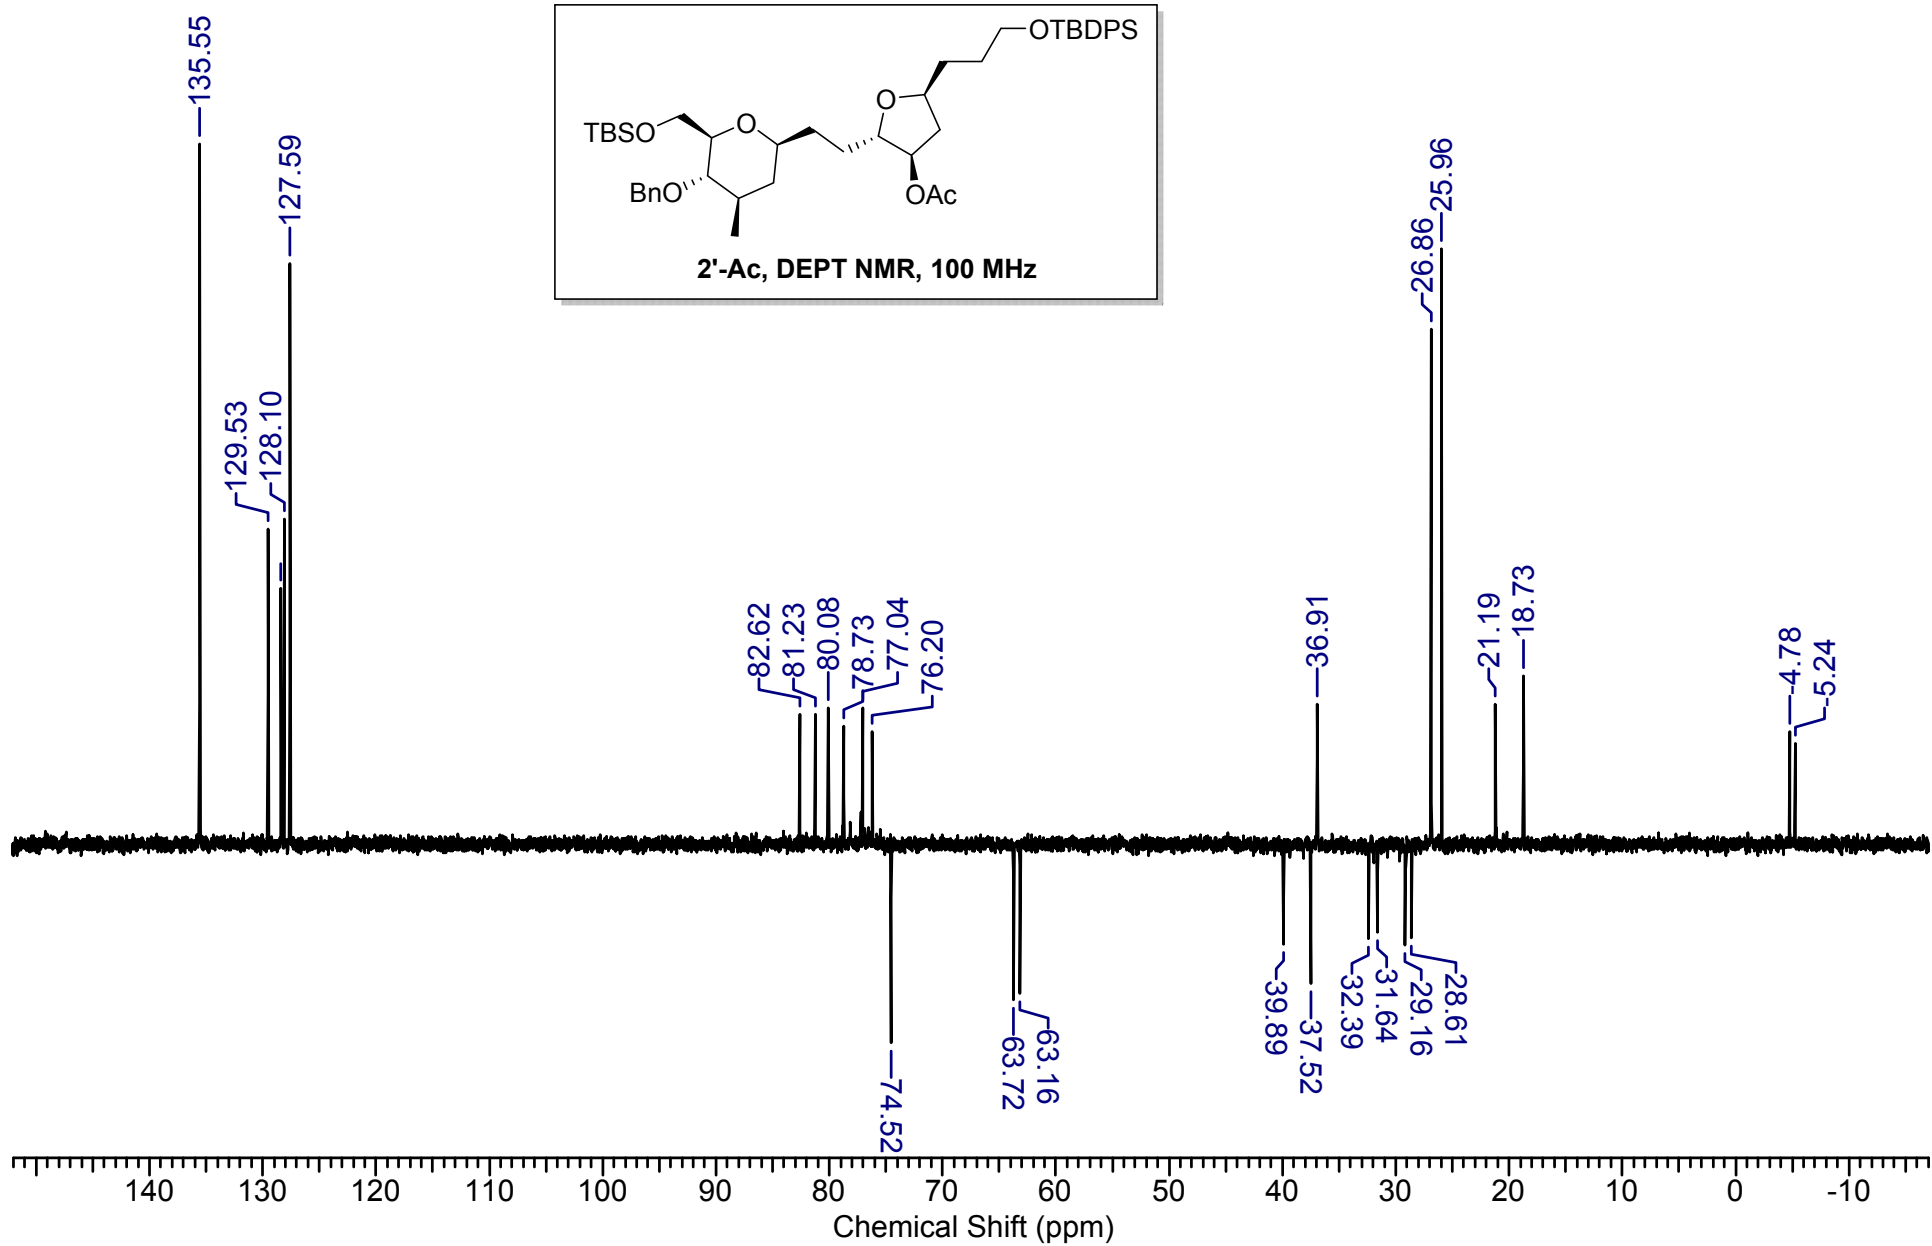



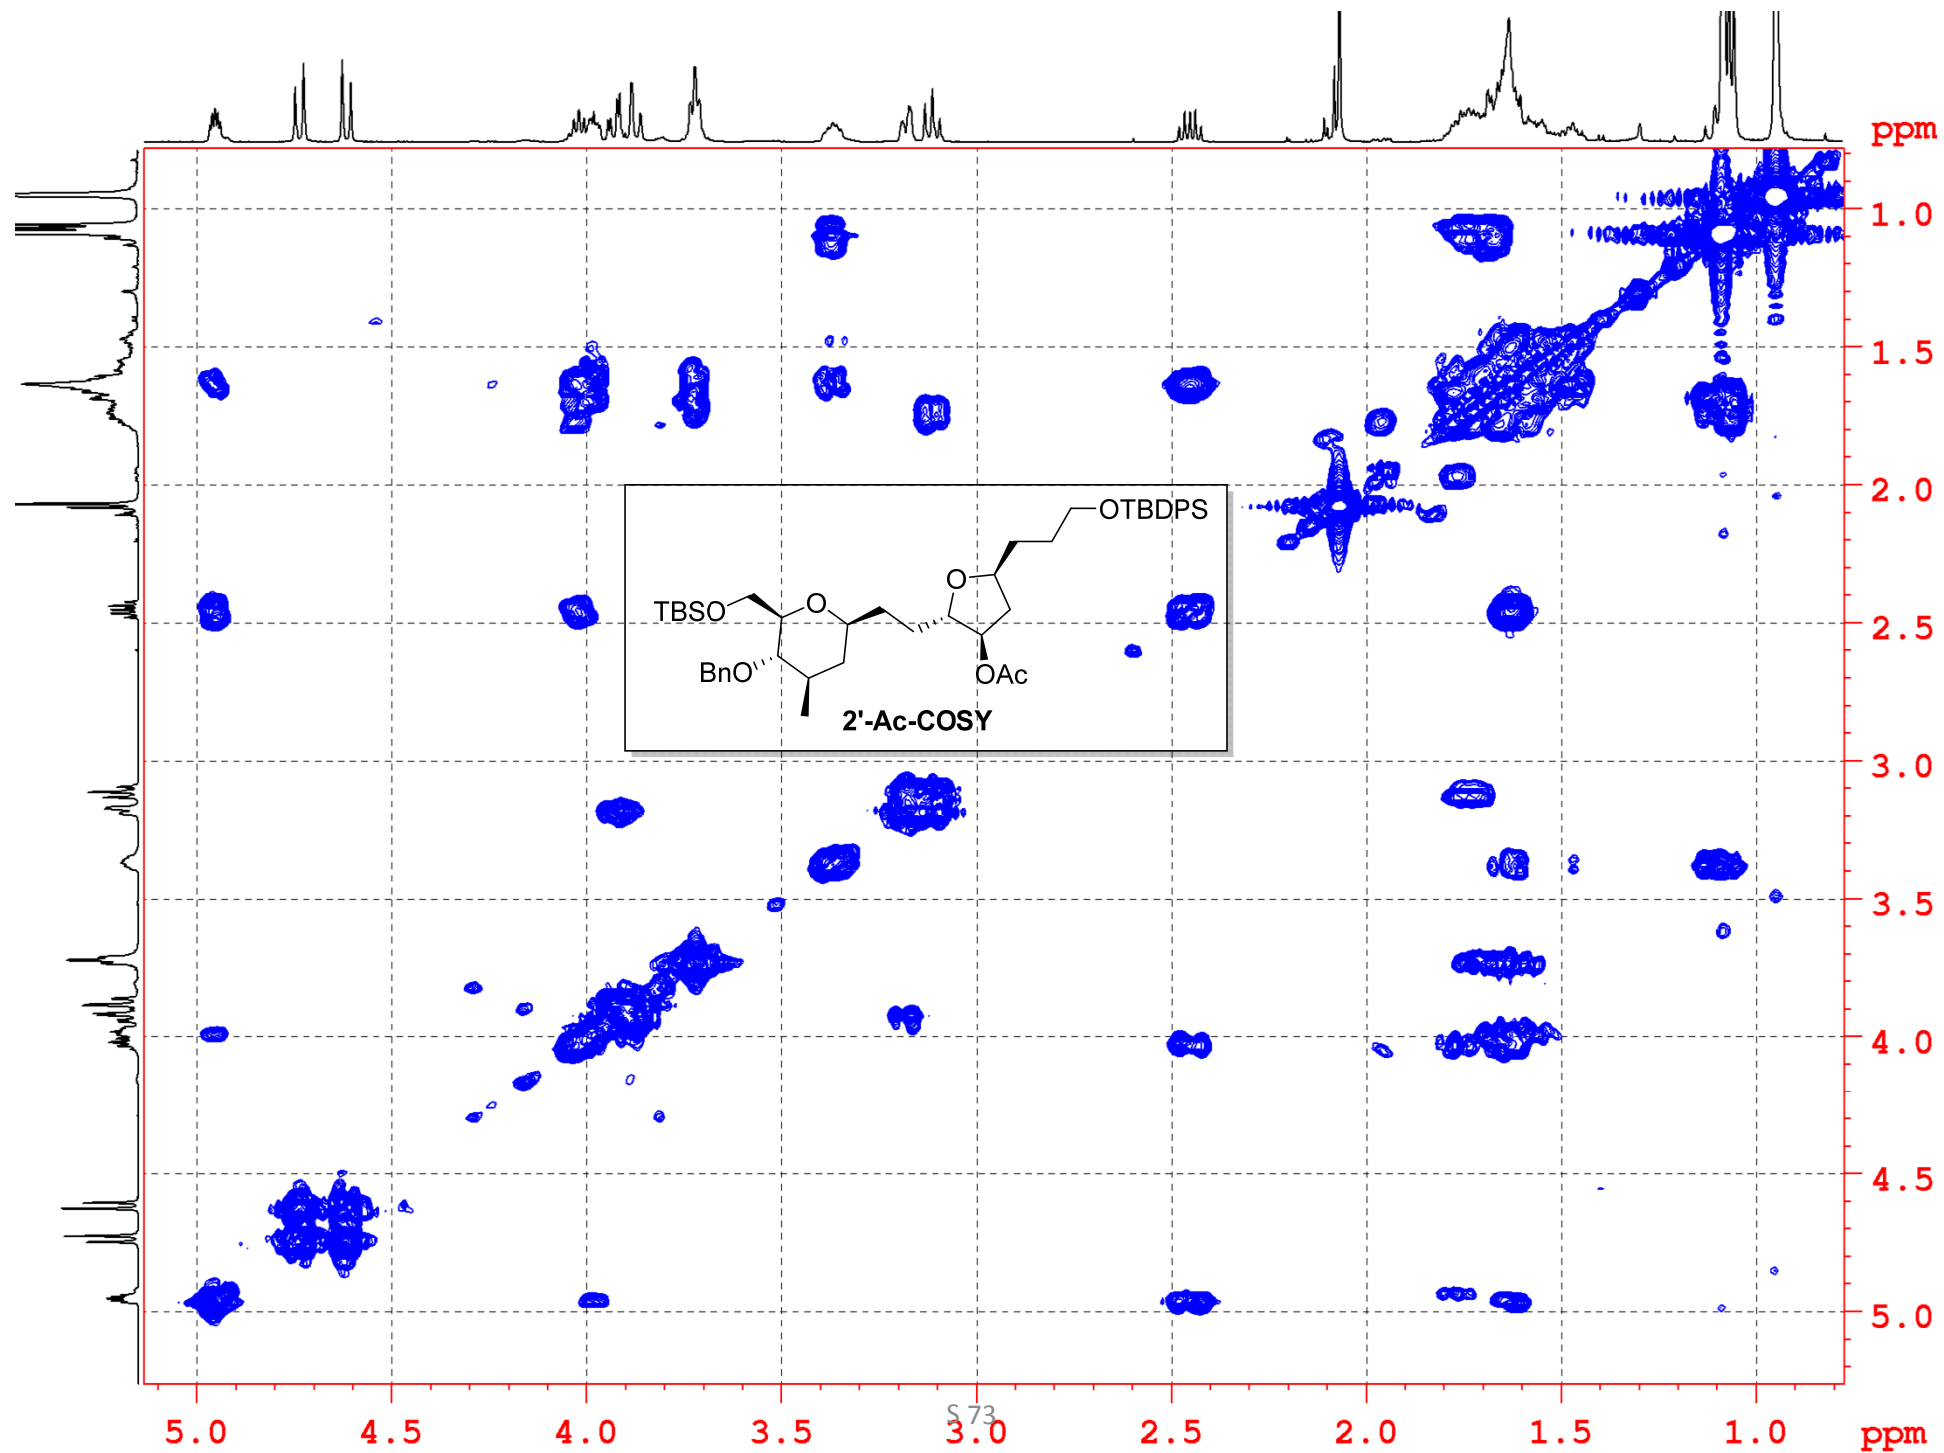

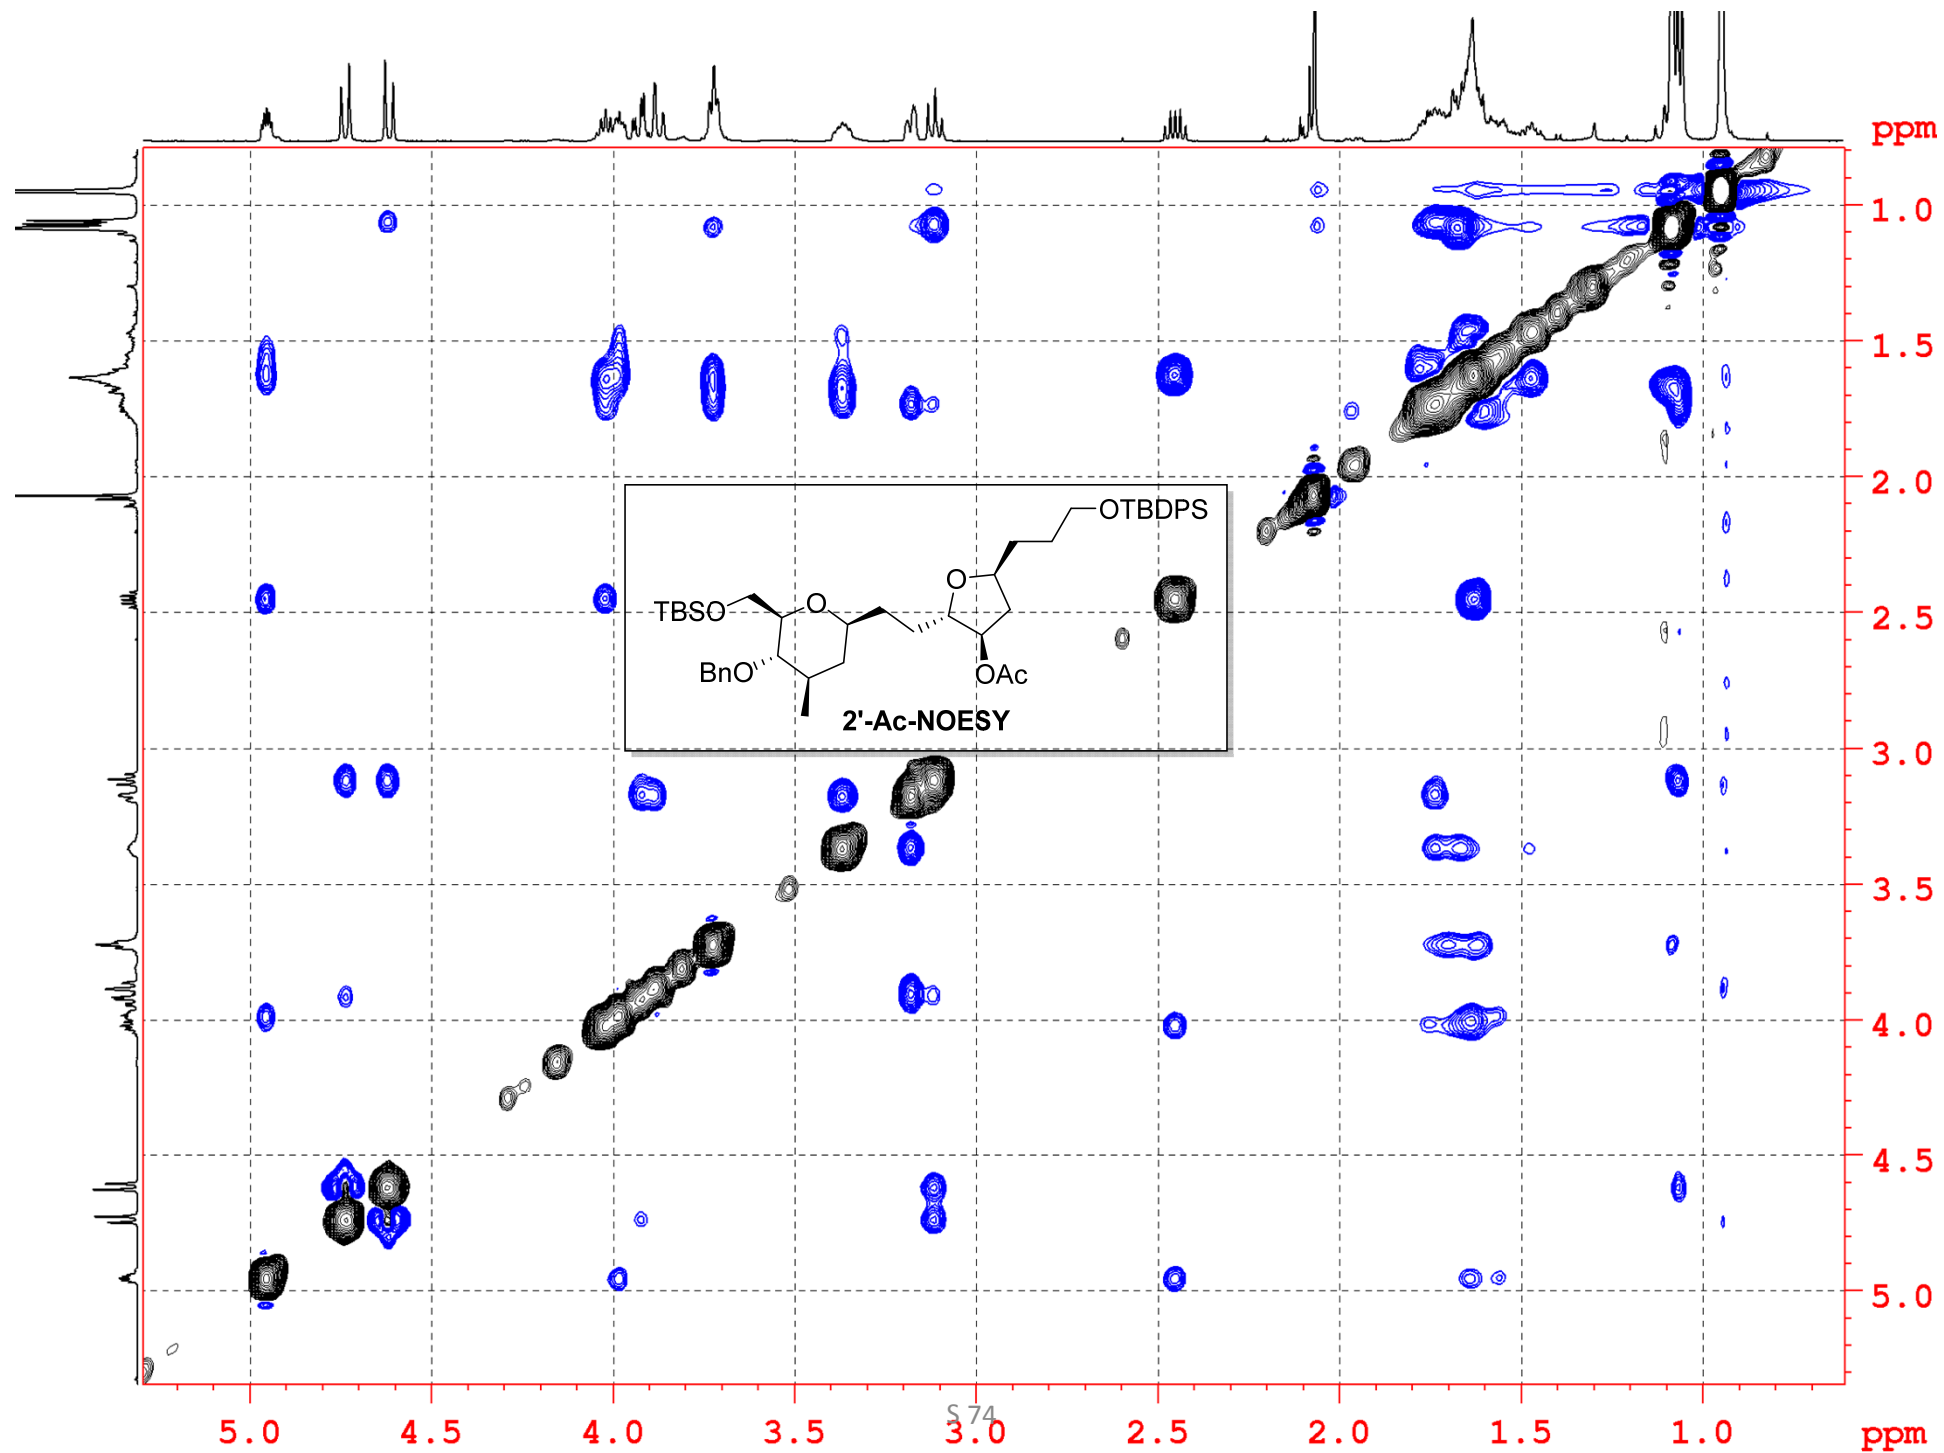

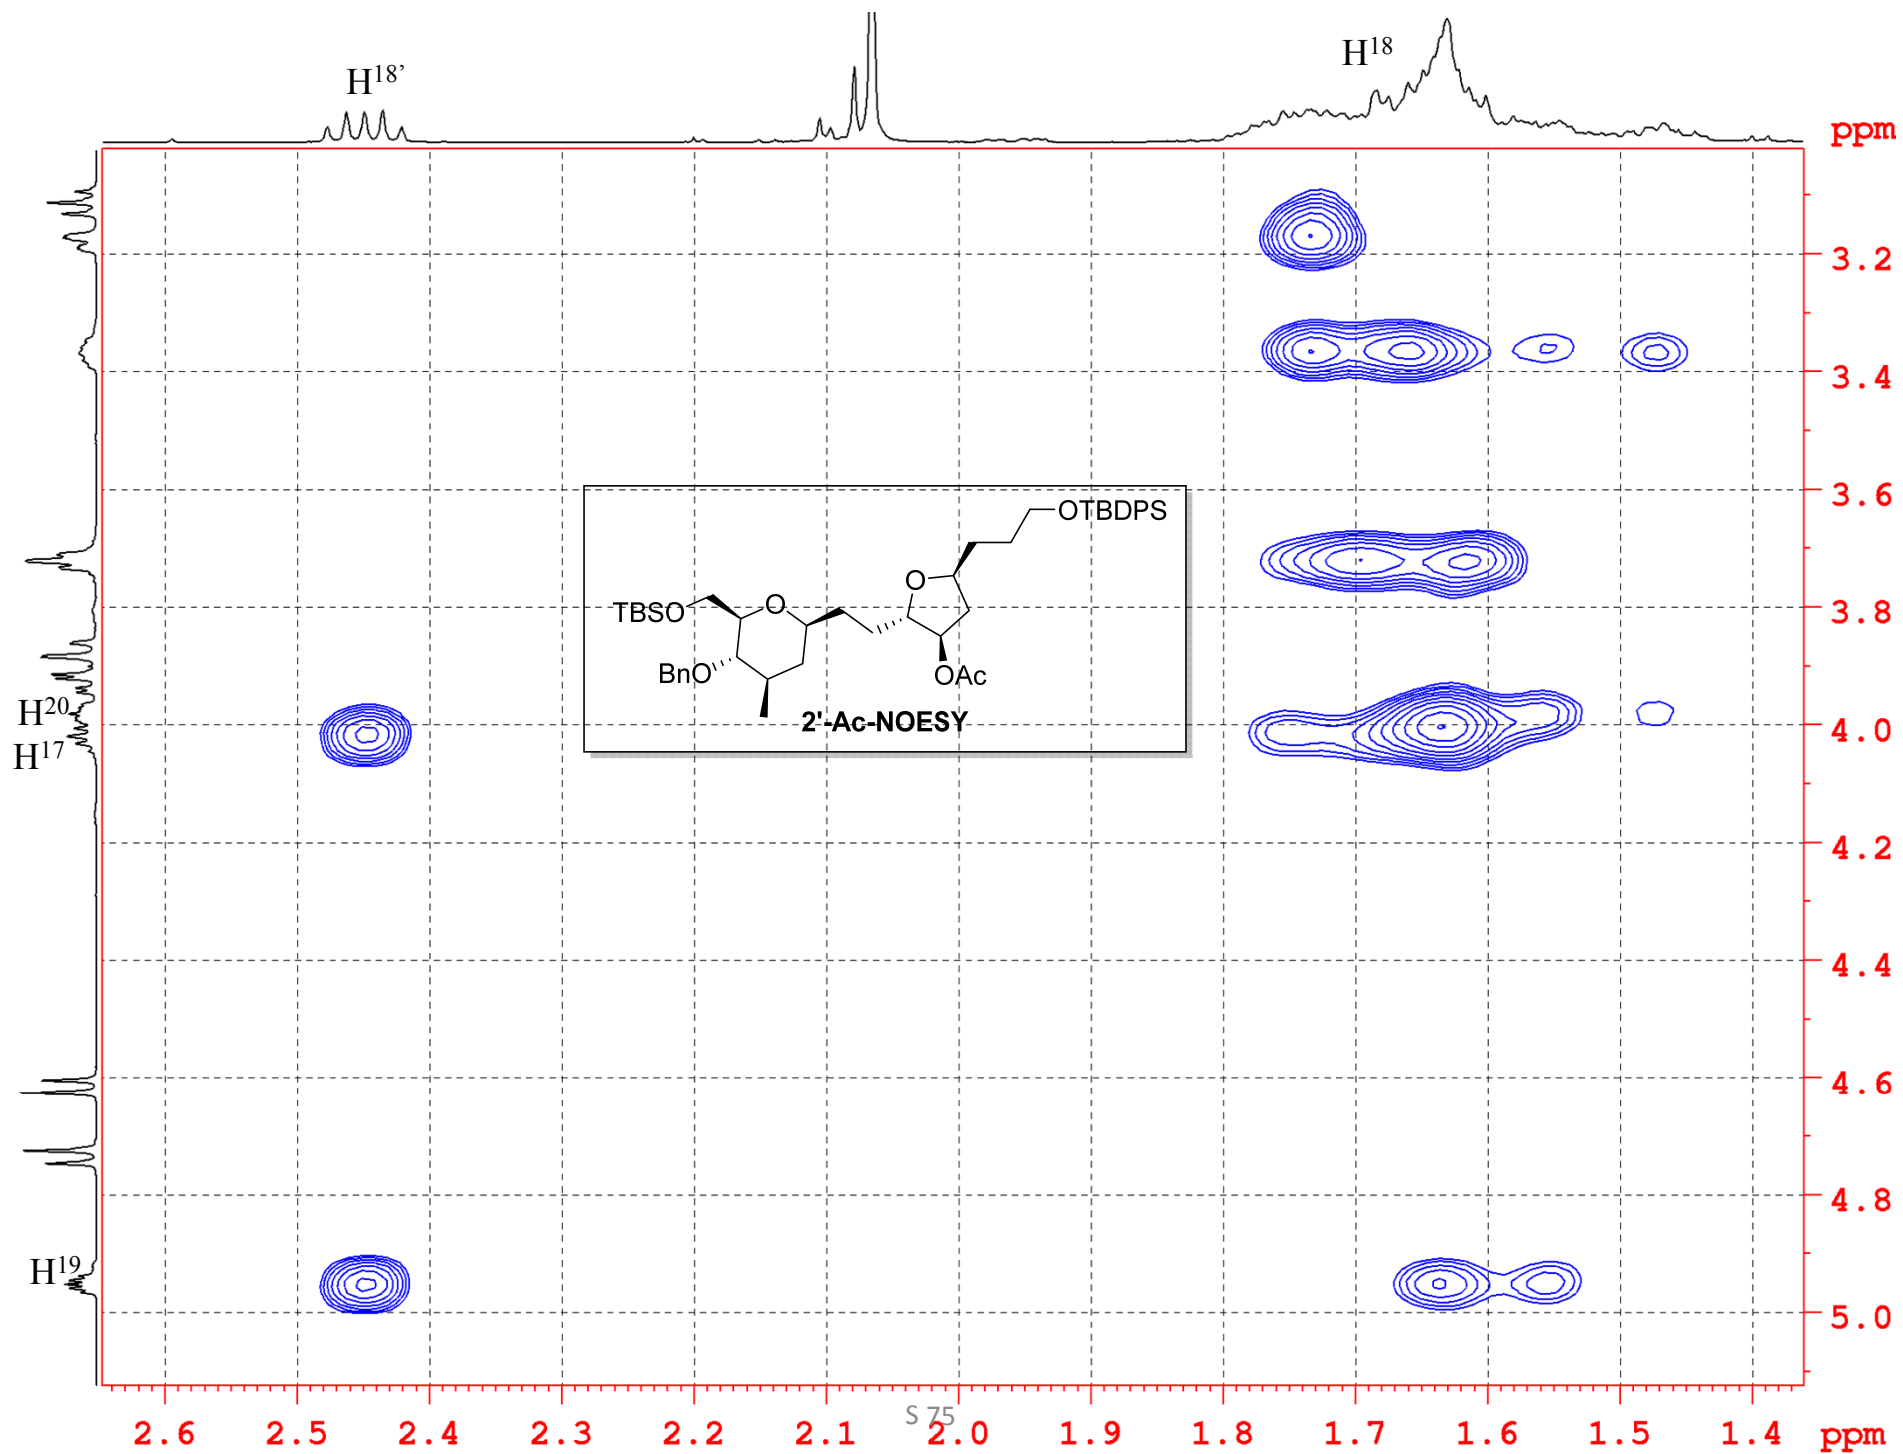

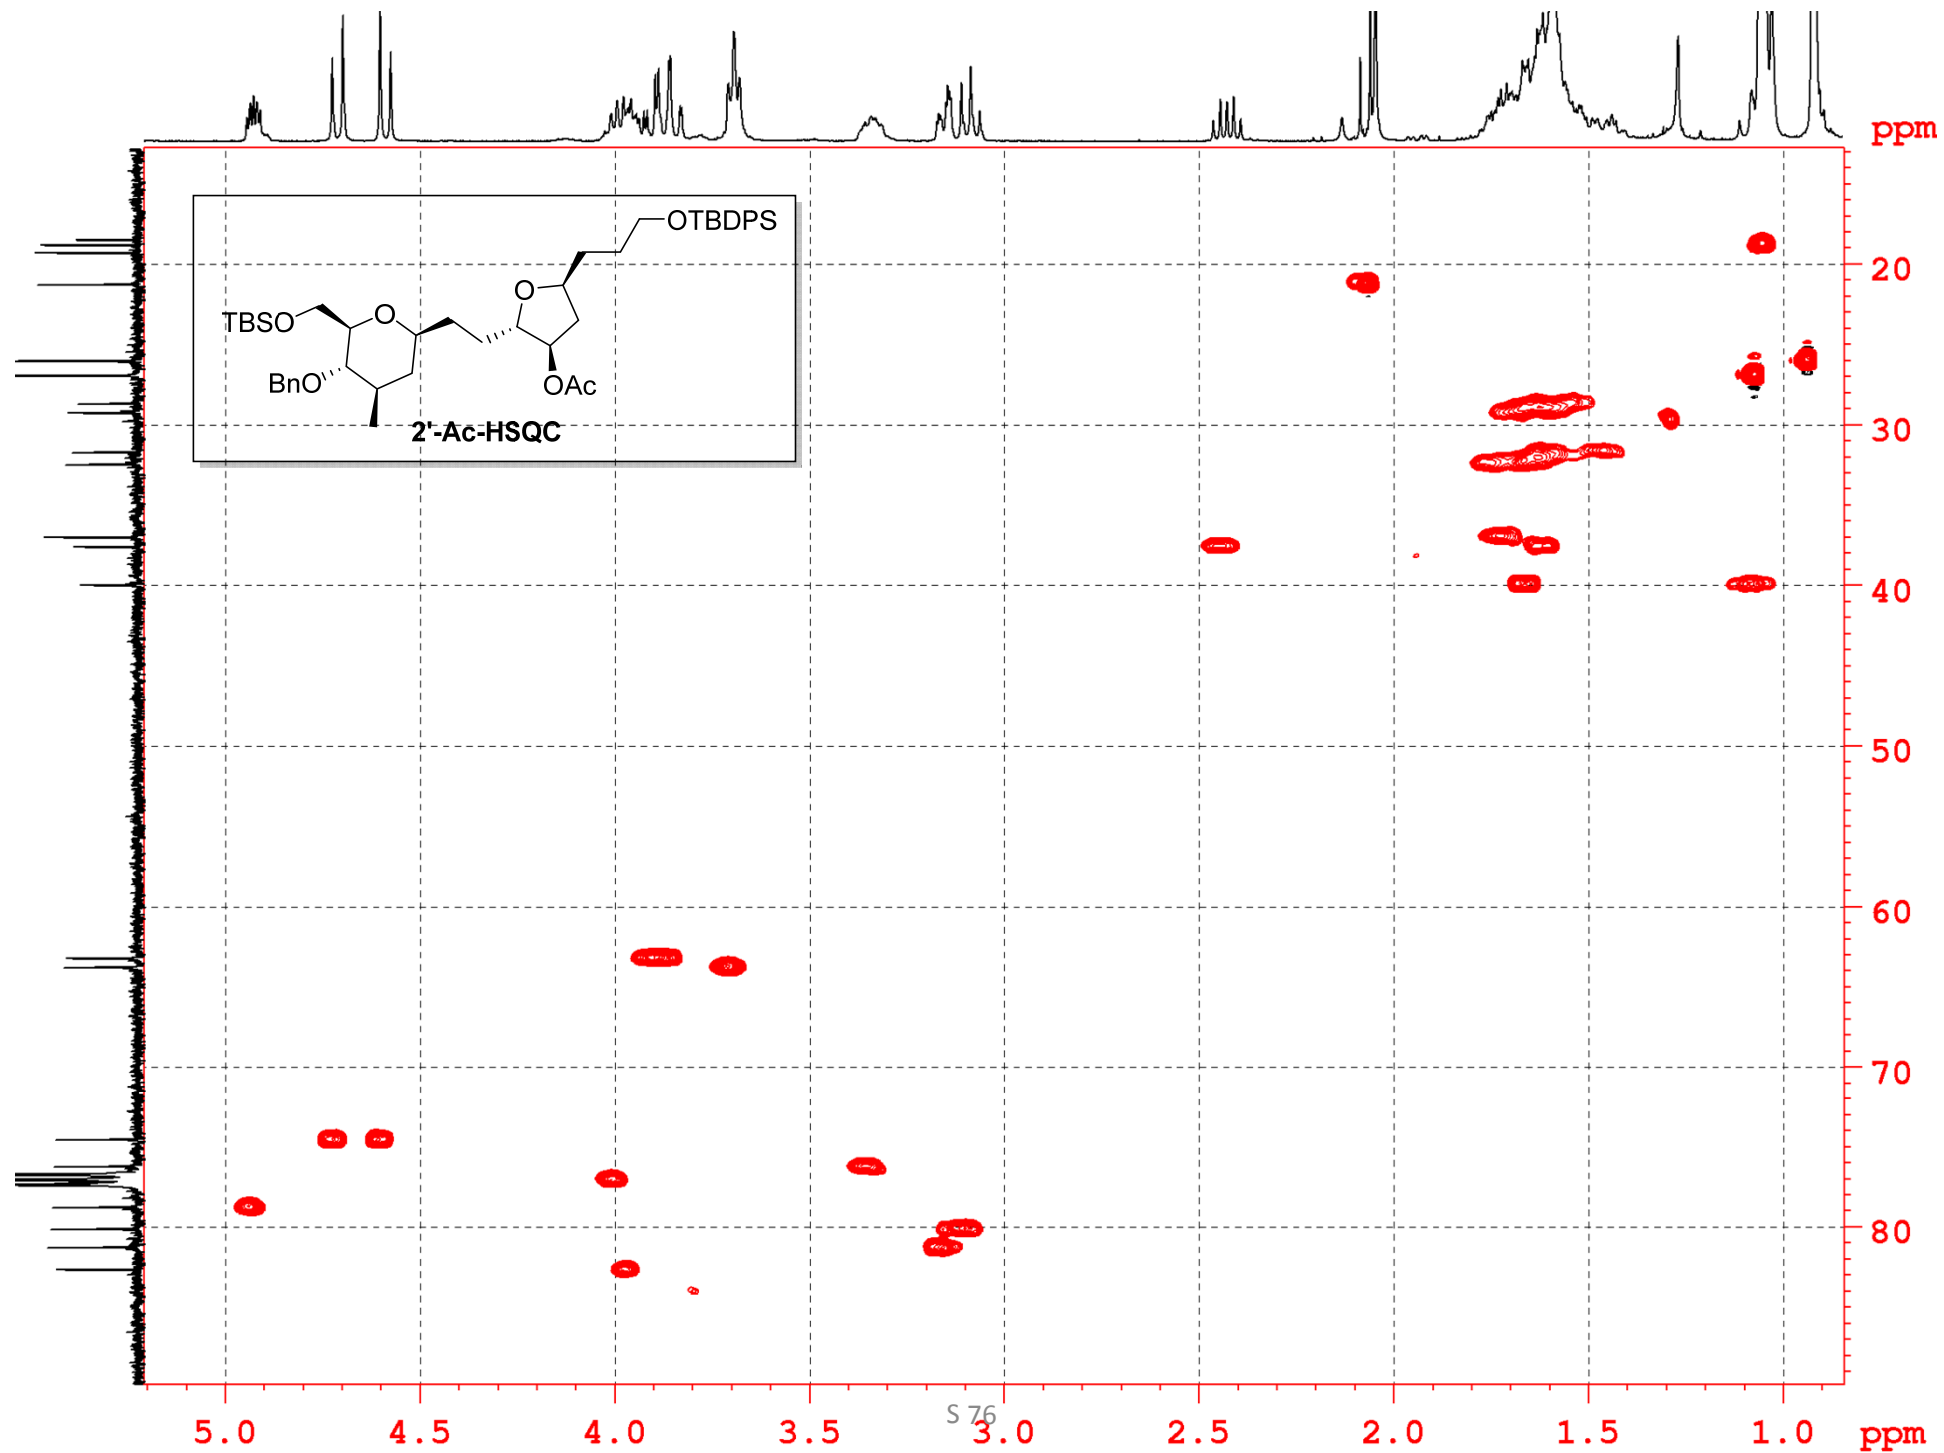

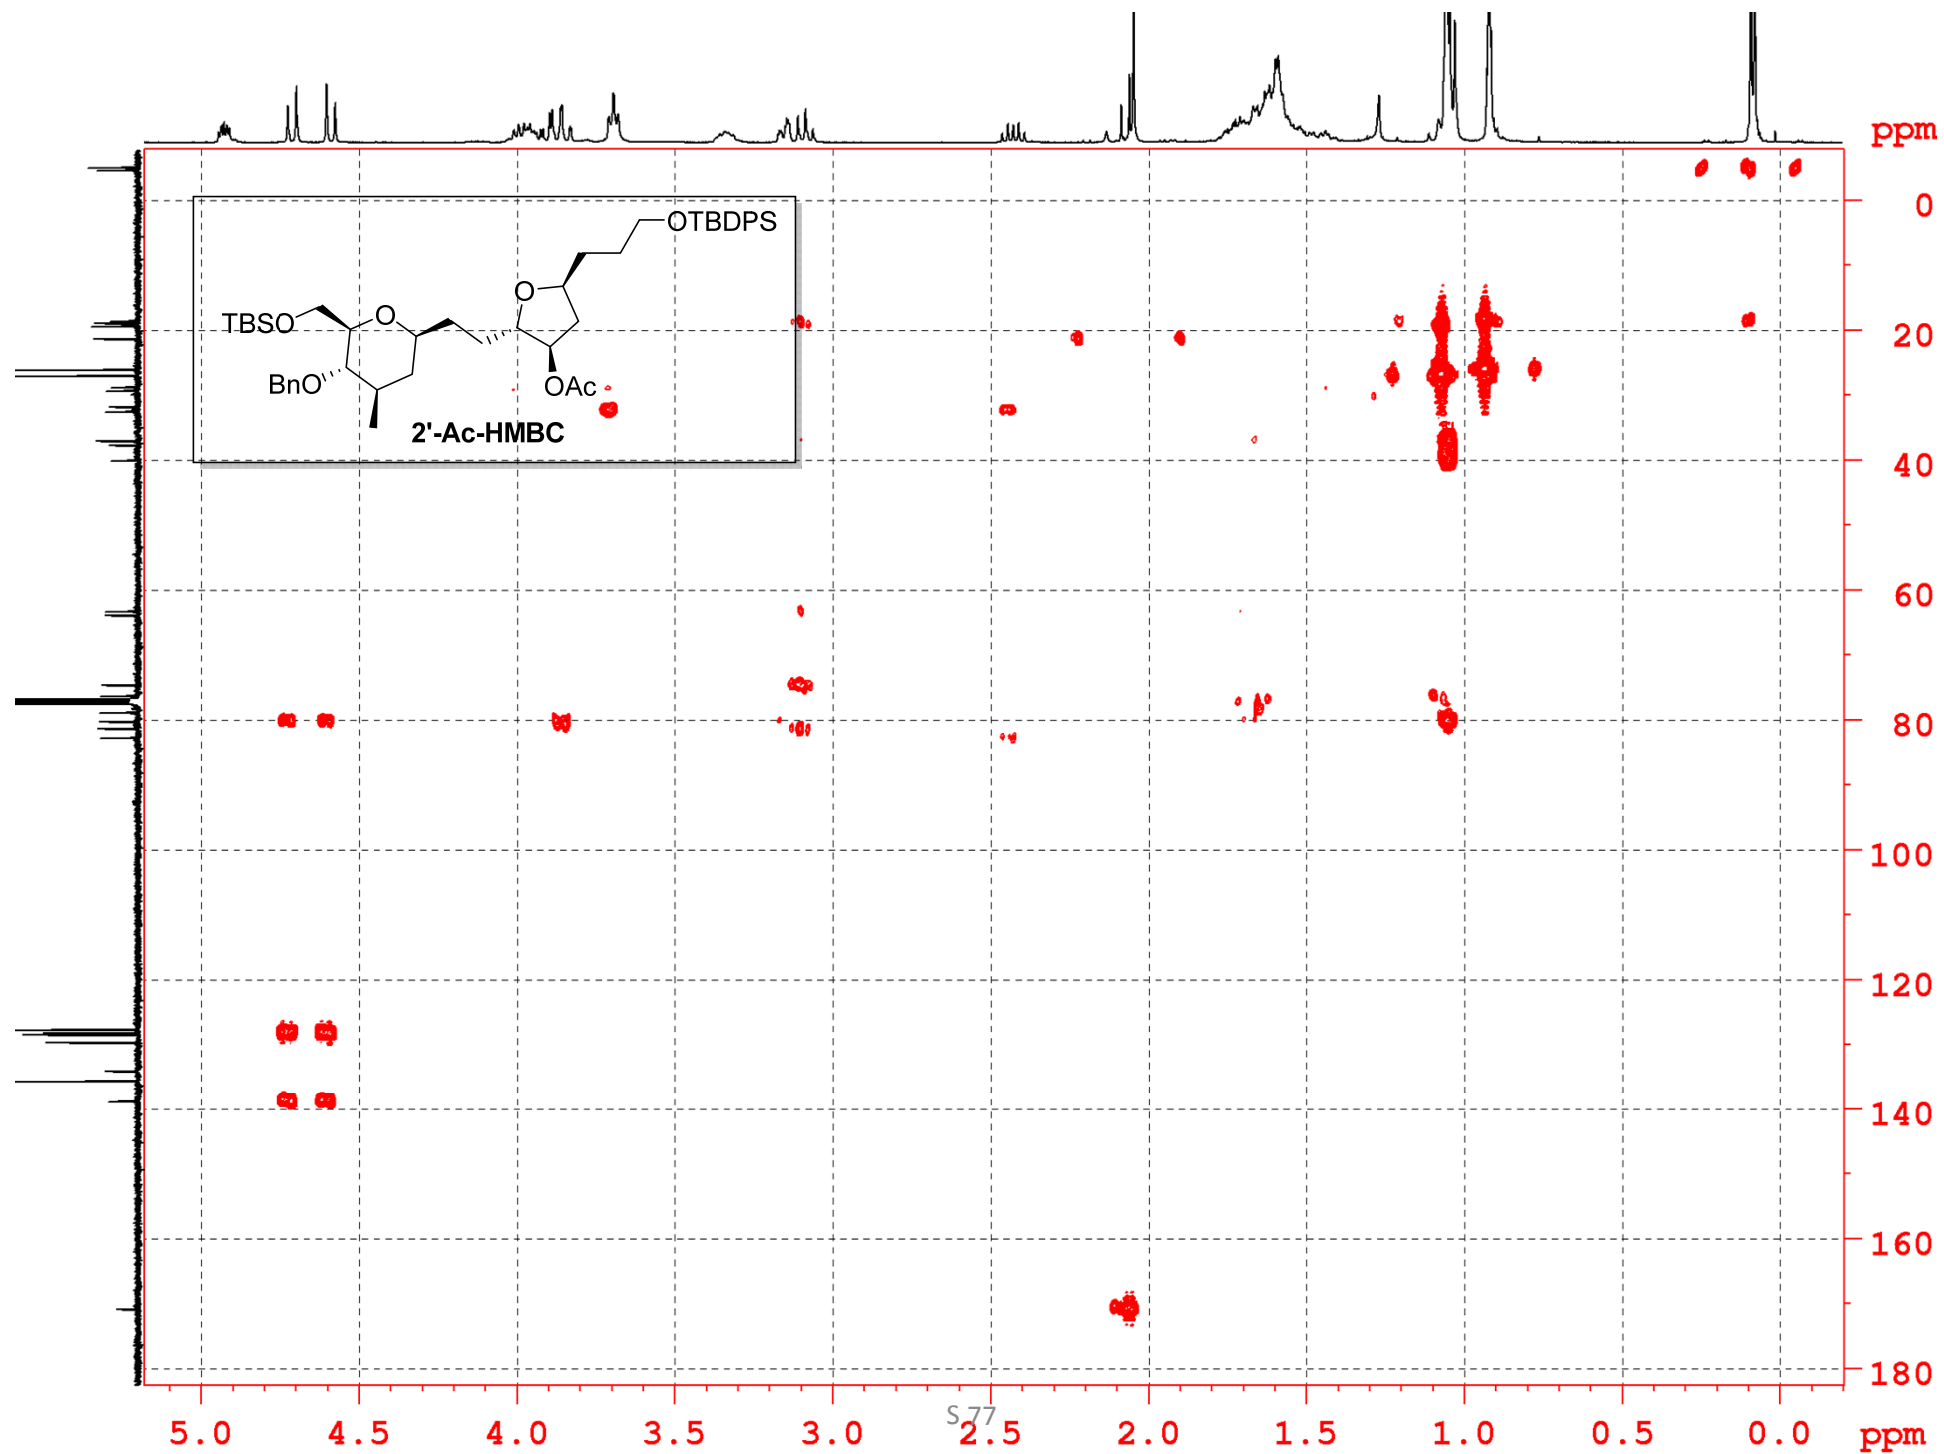

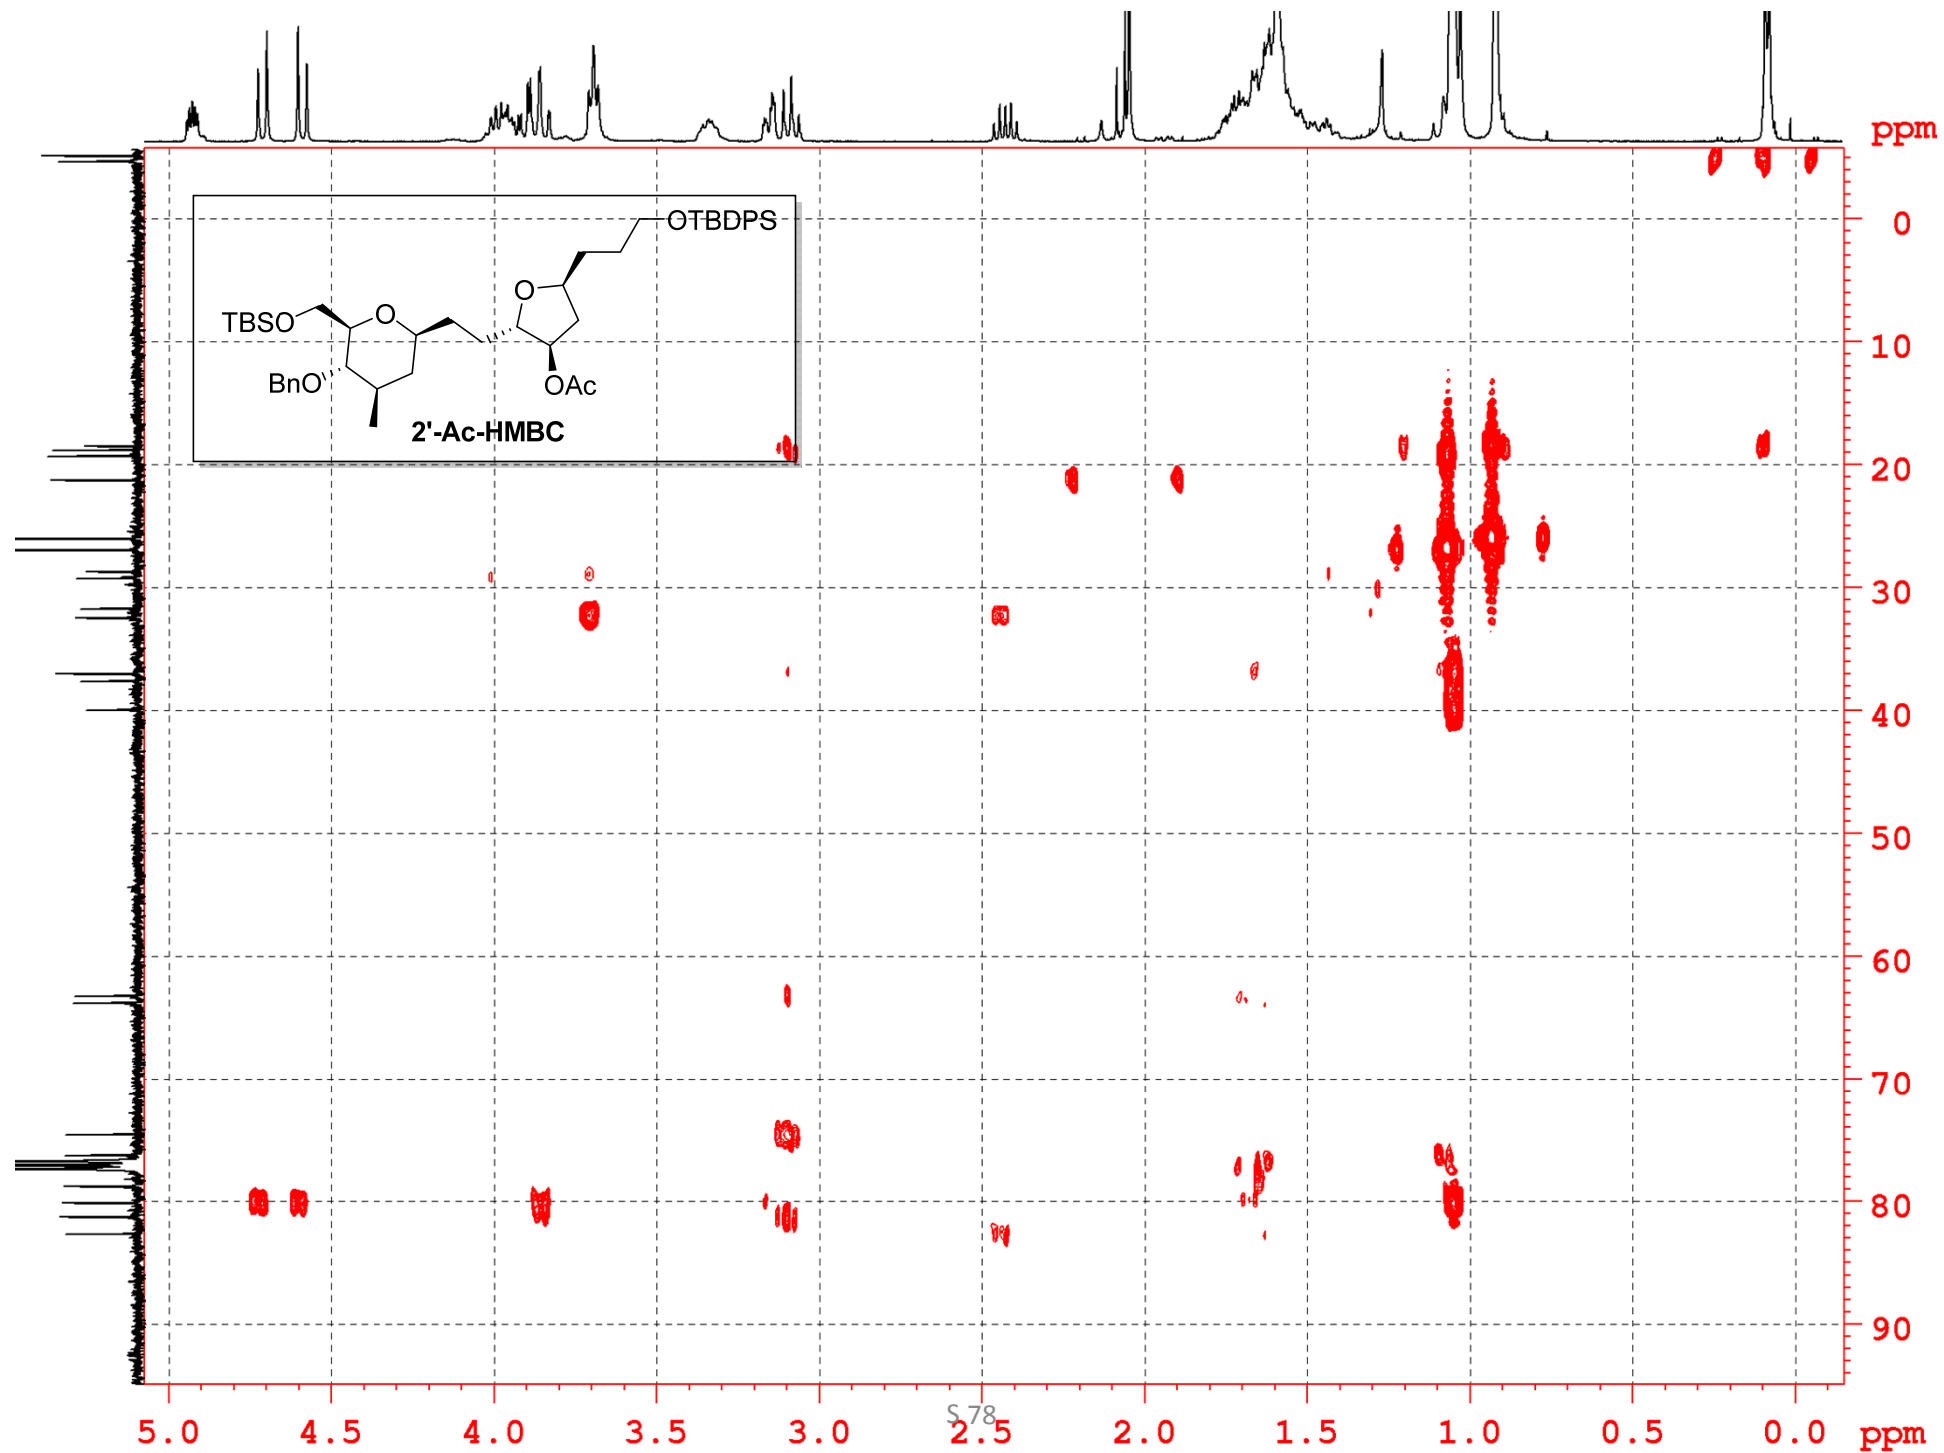

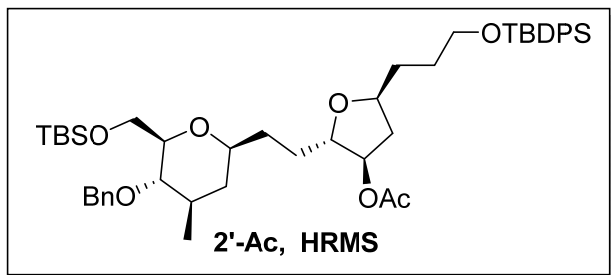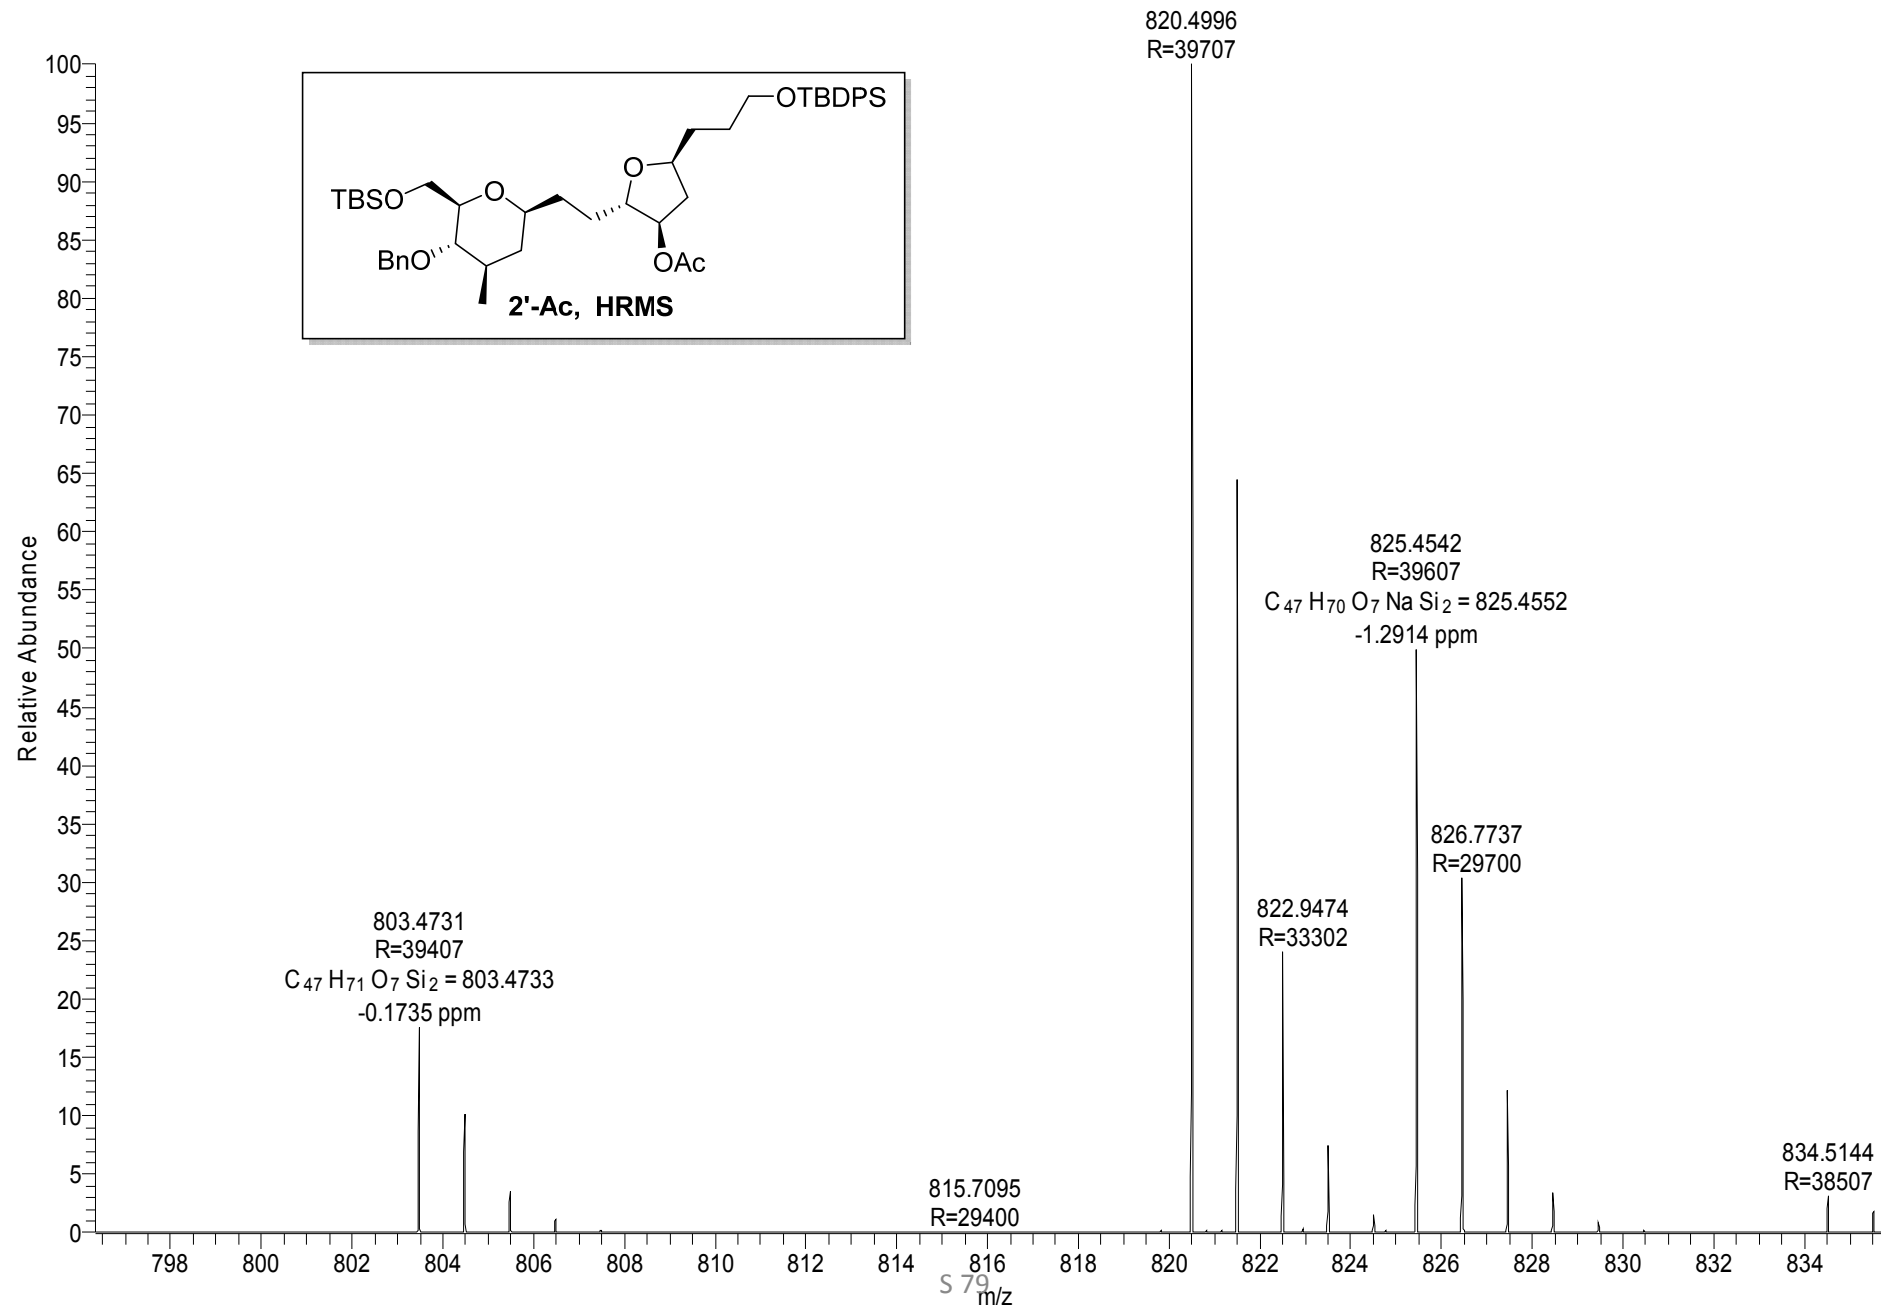

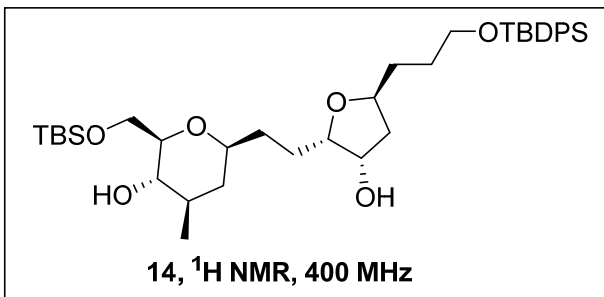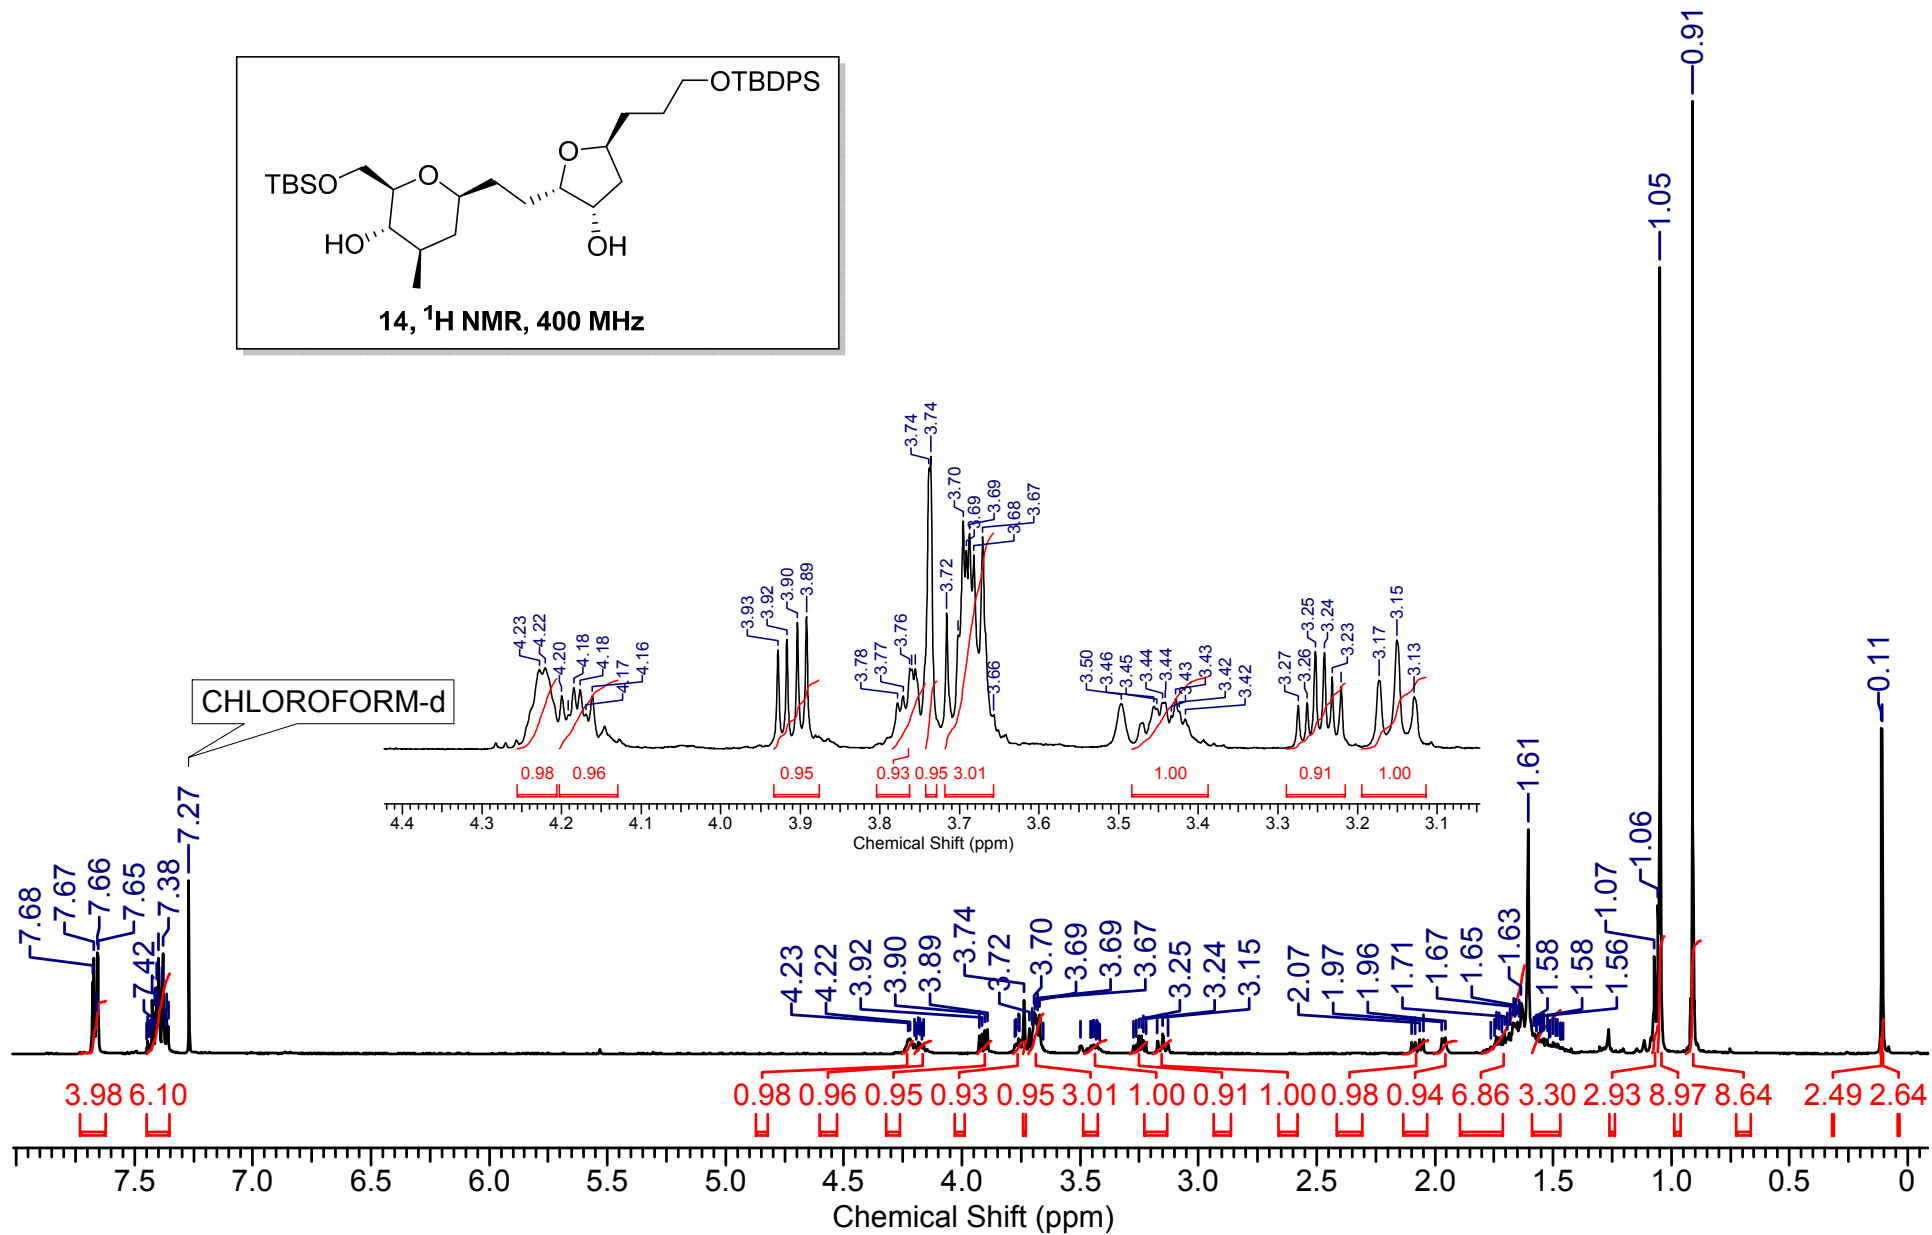



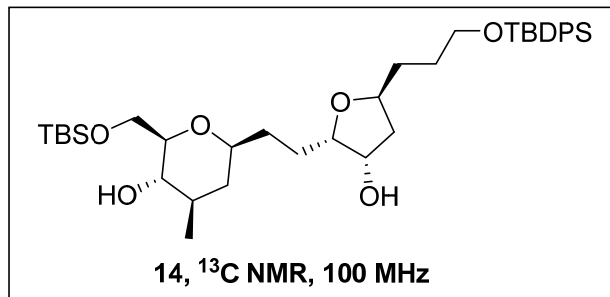

CHLOROFORM-d

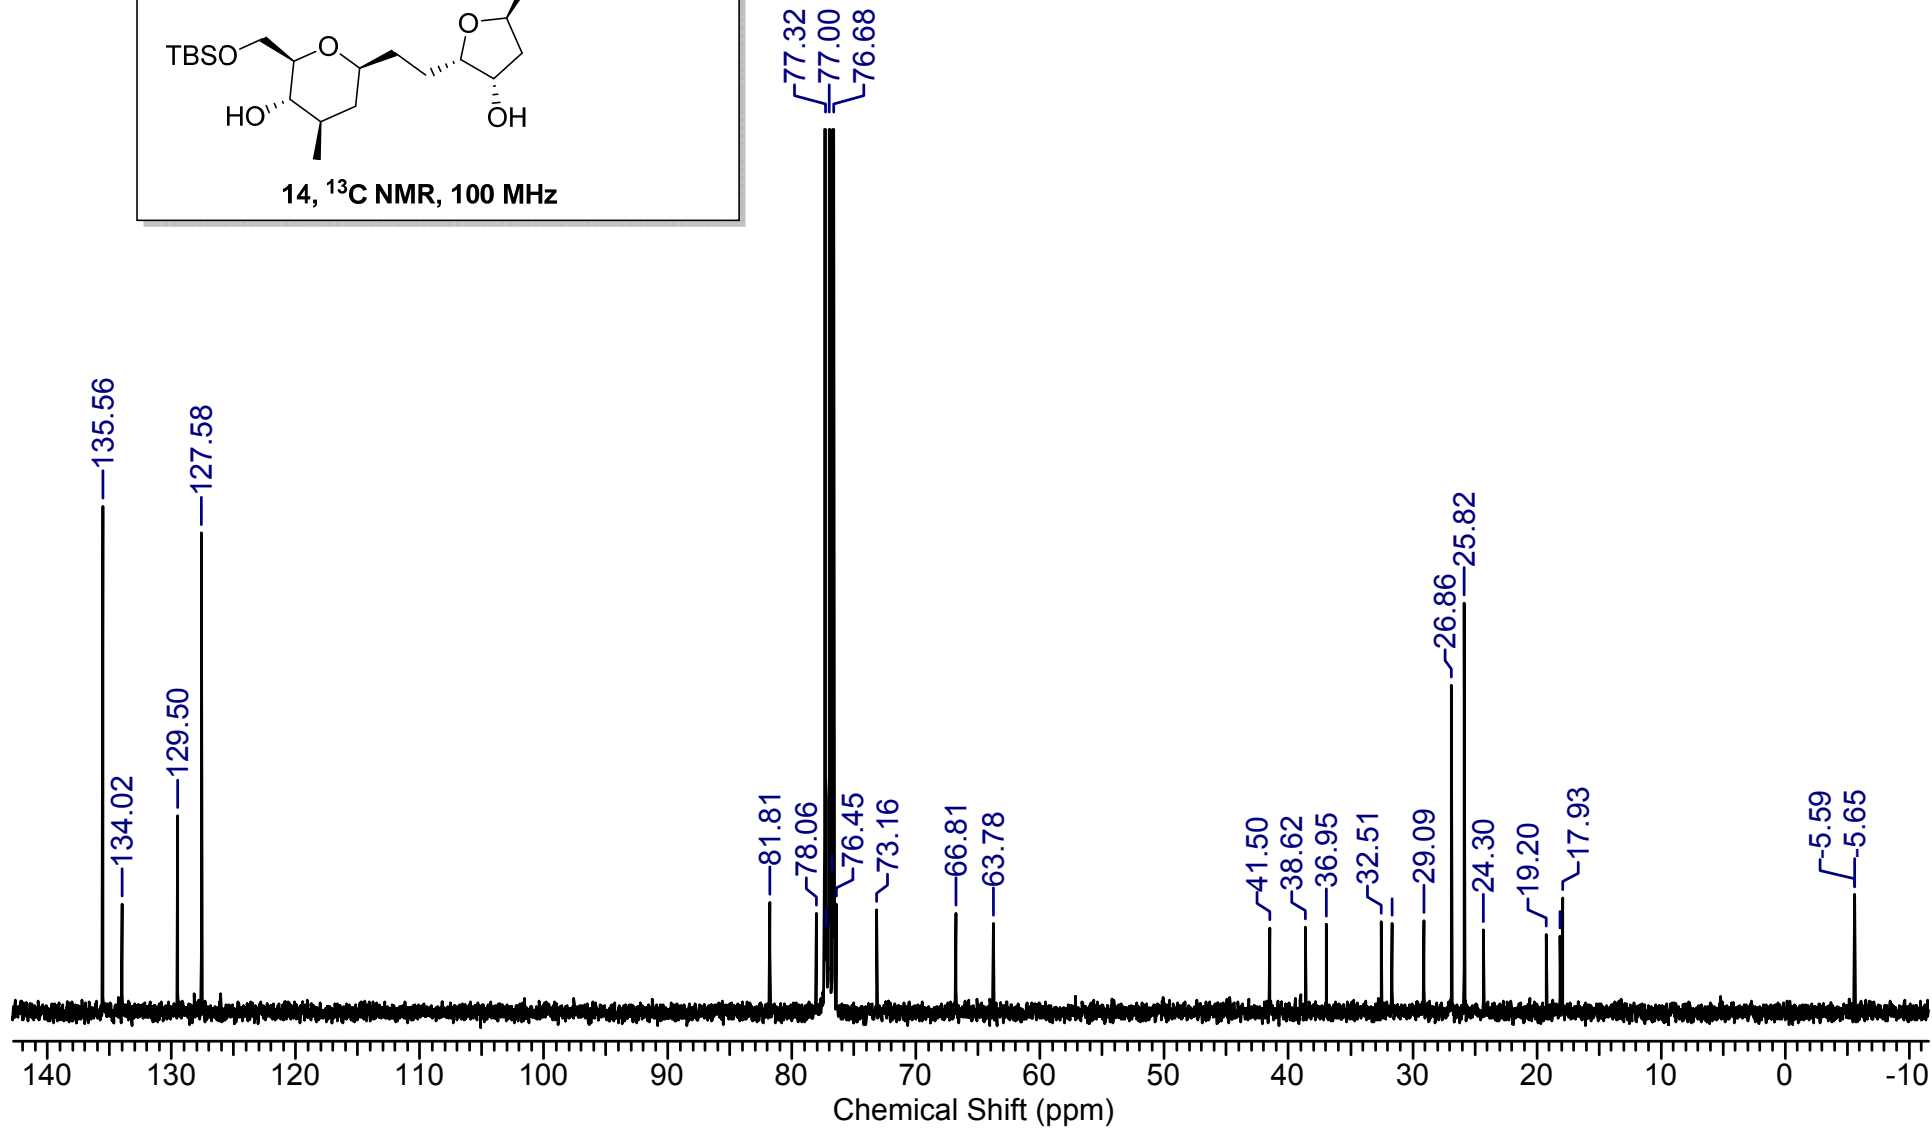

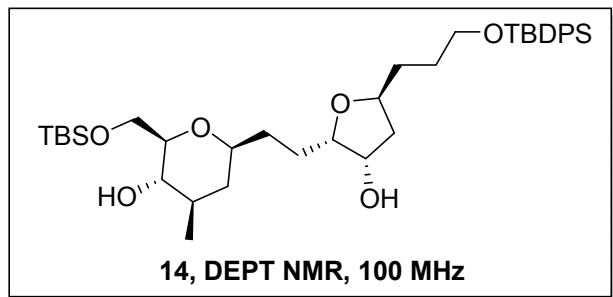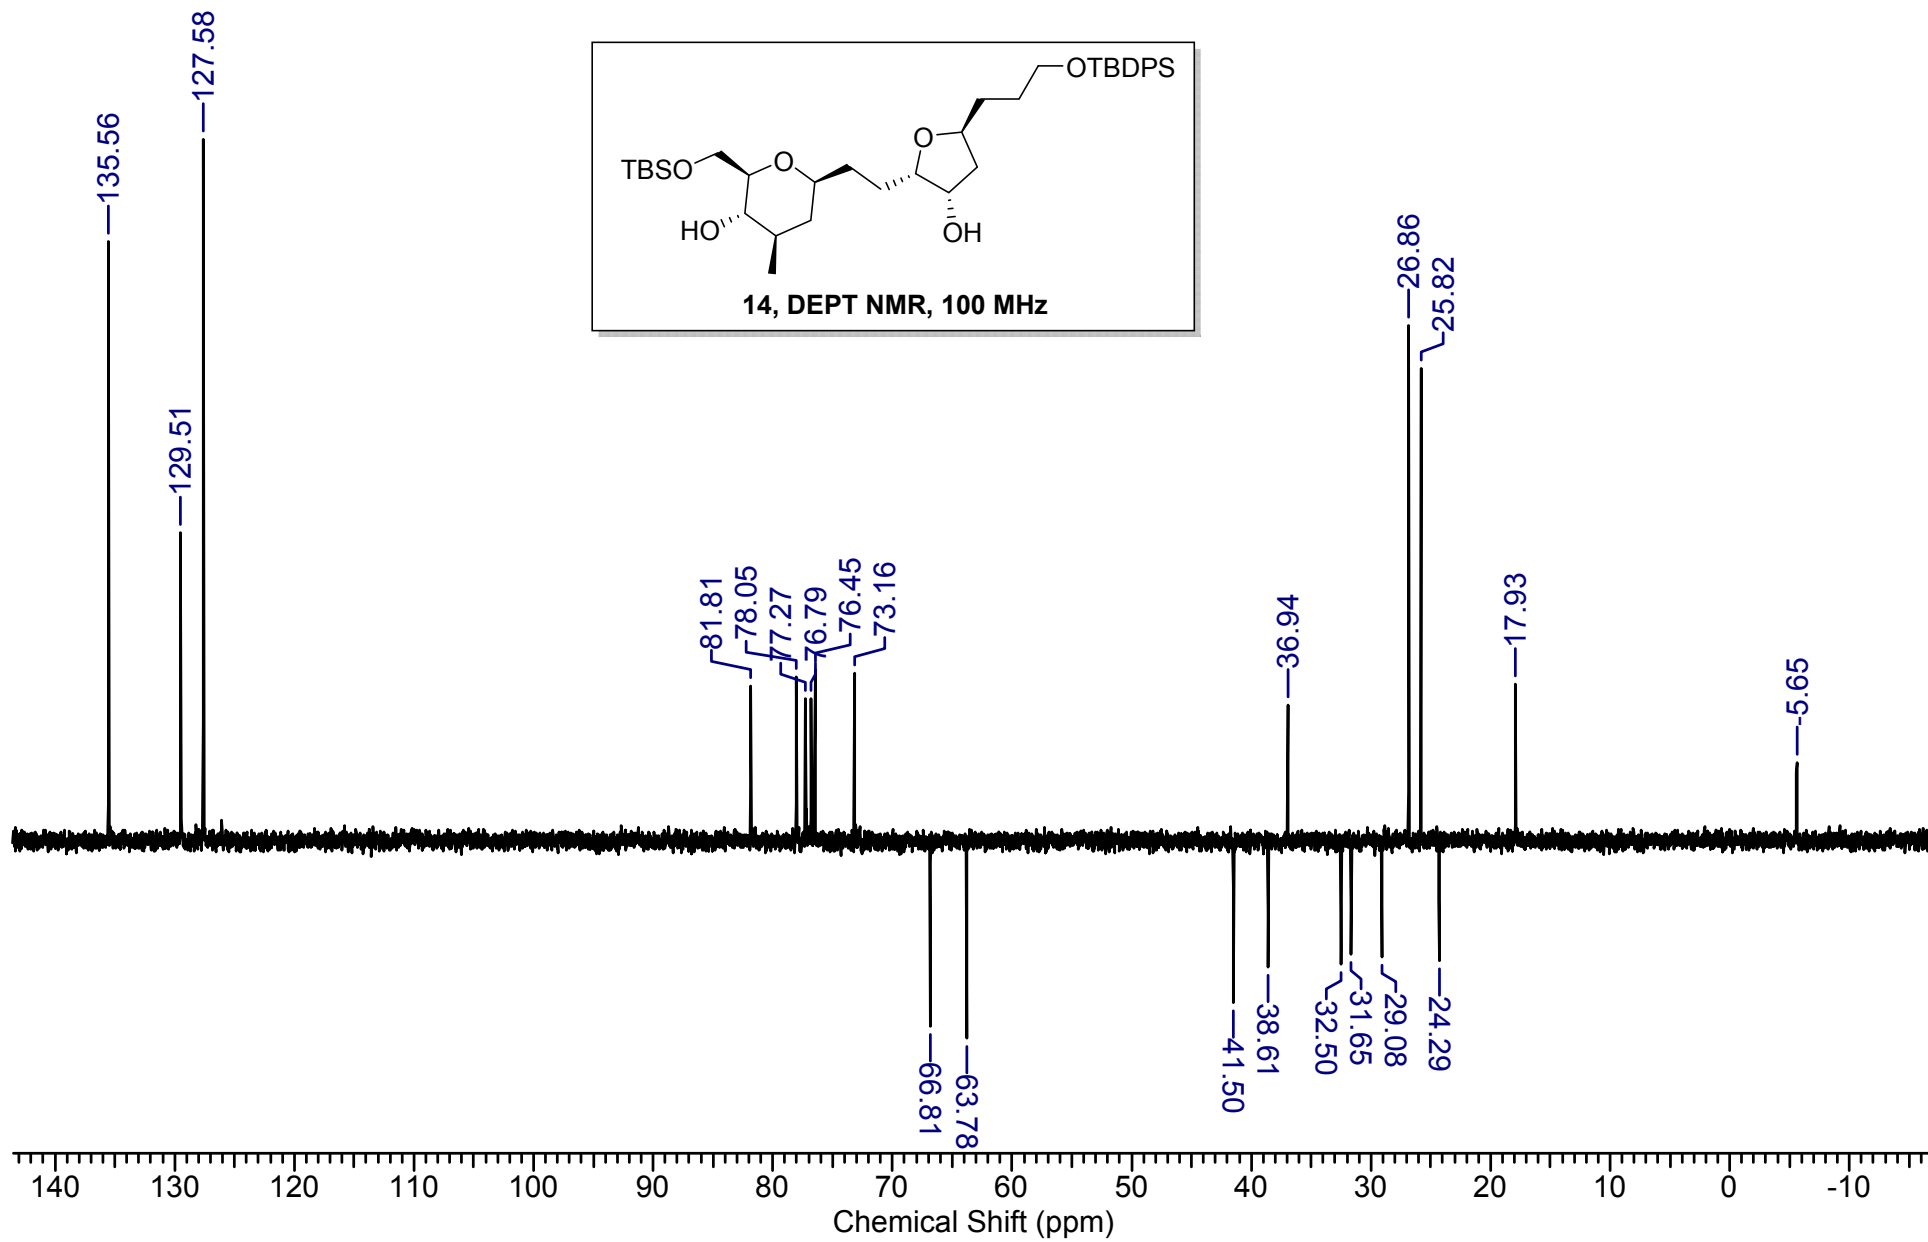

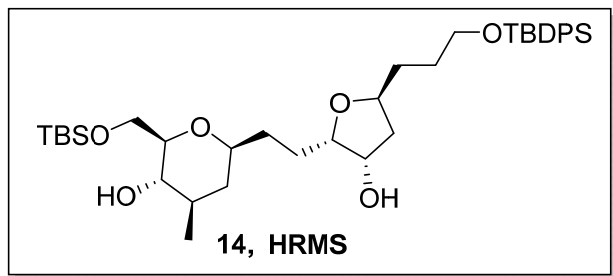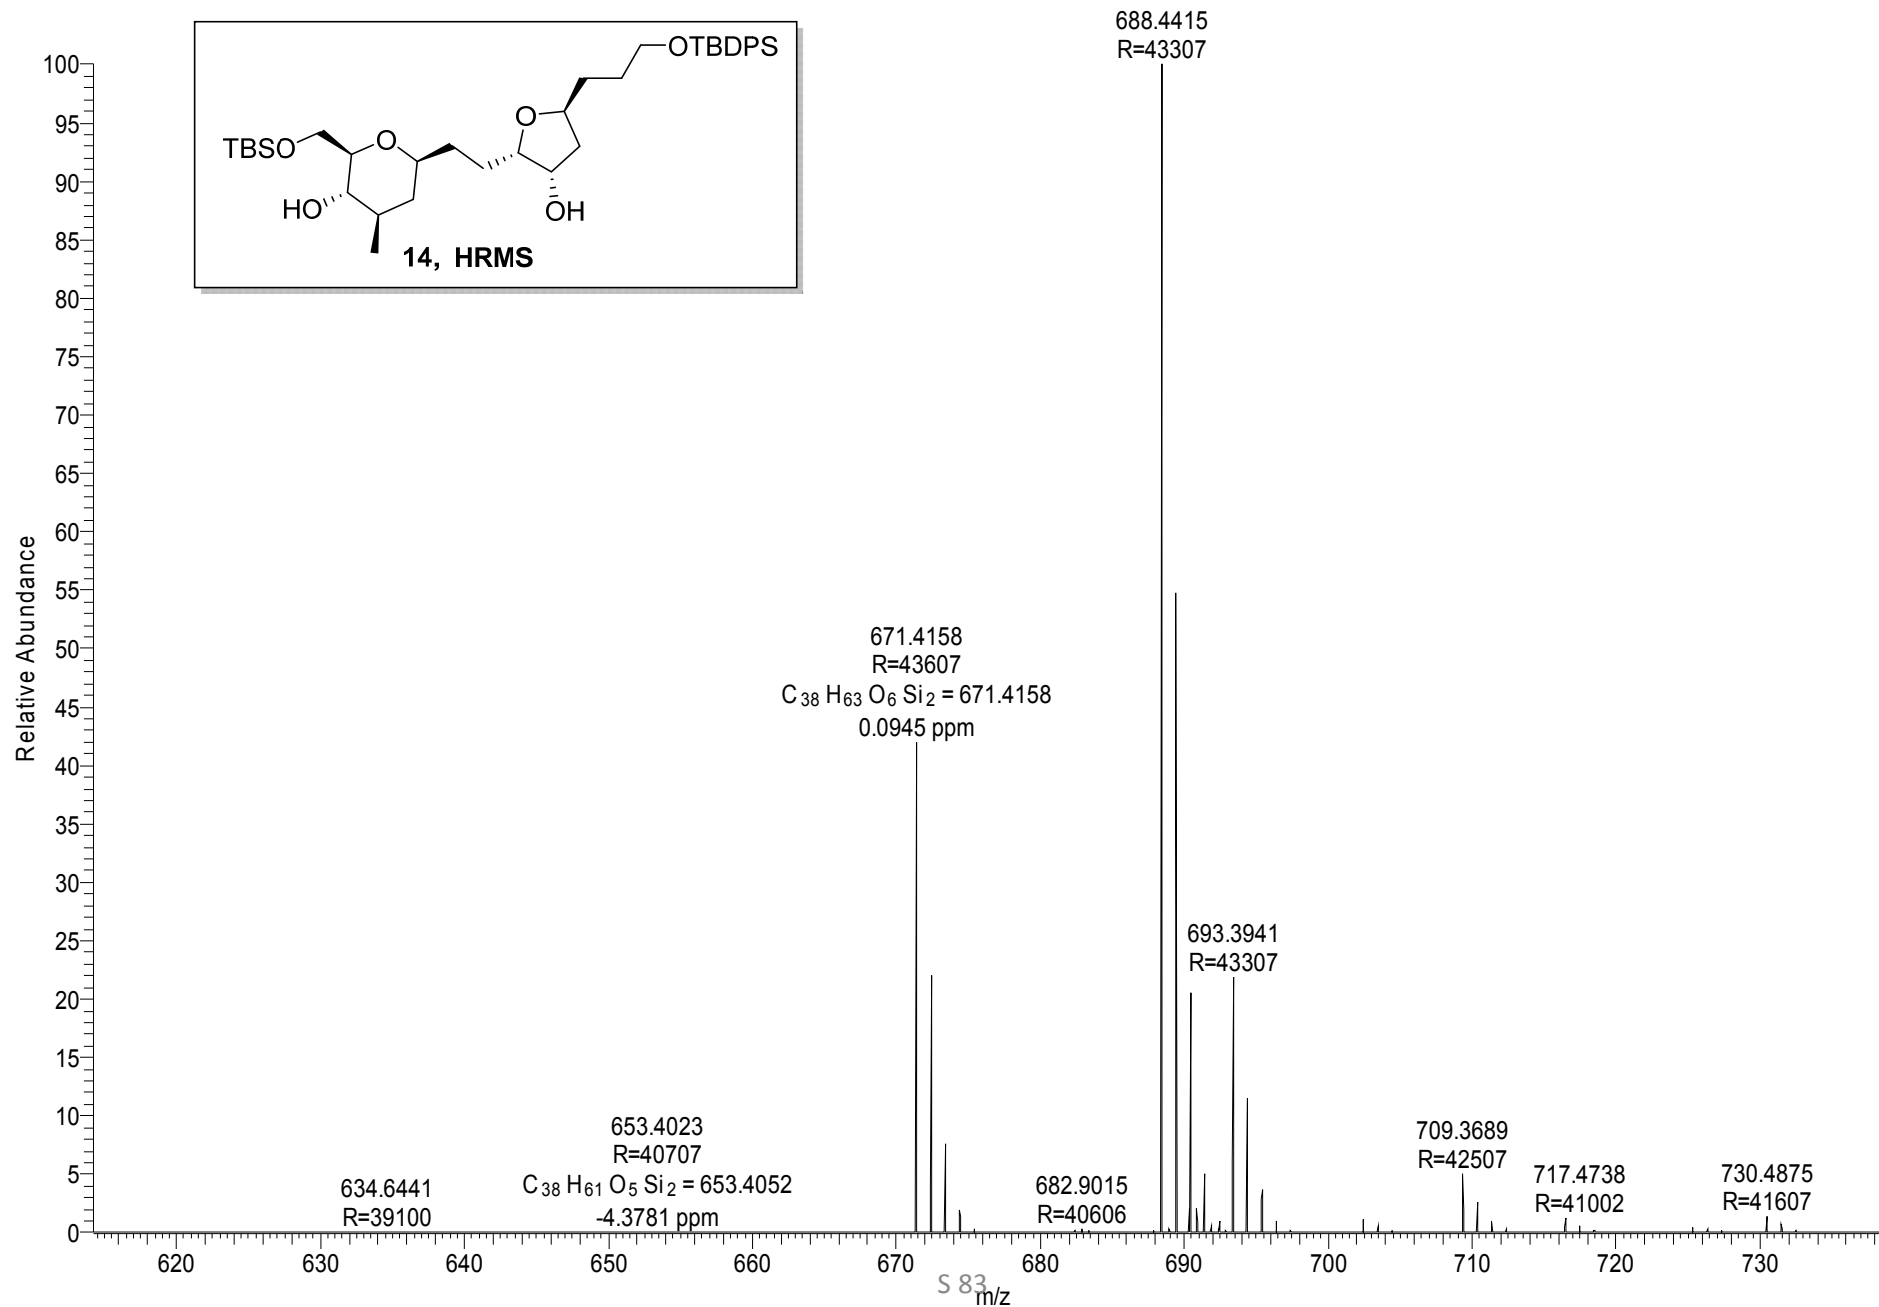

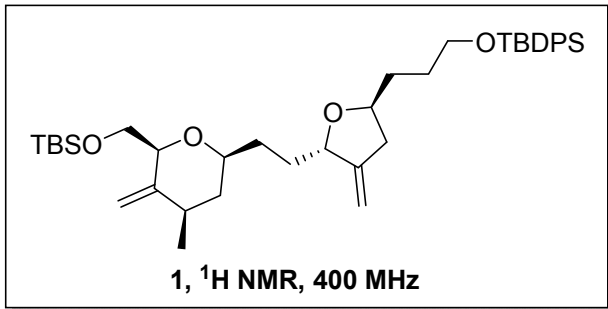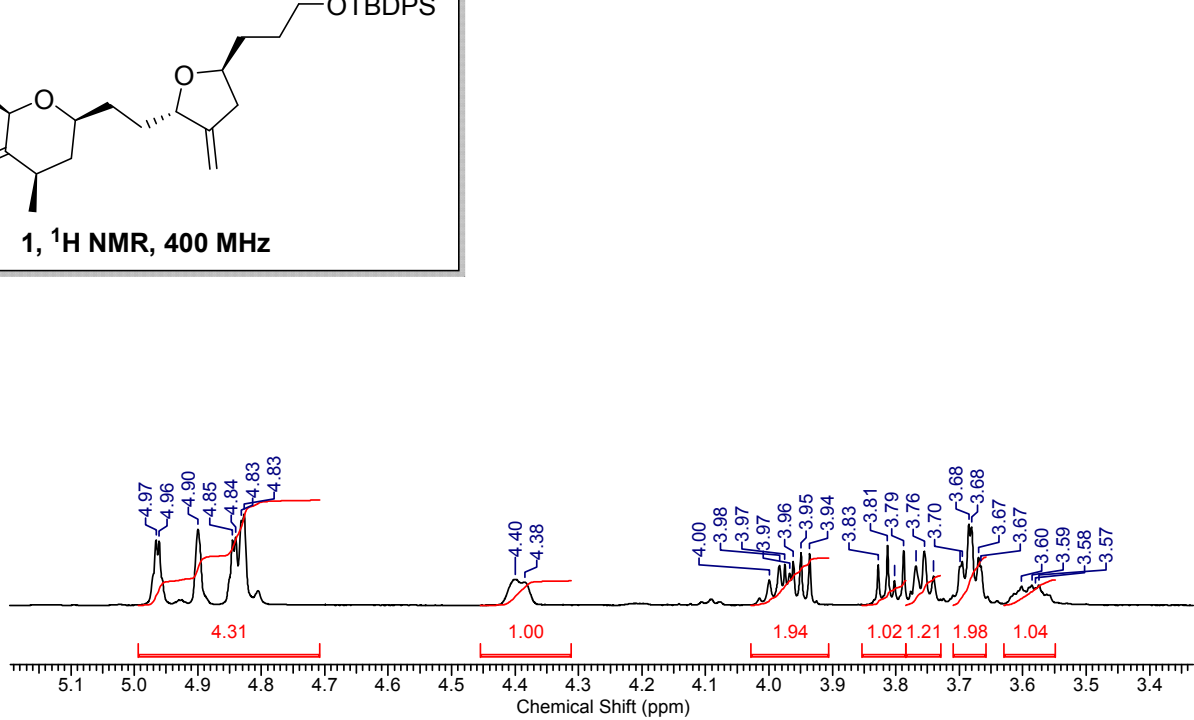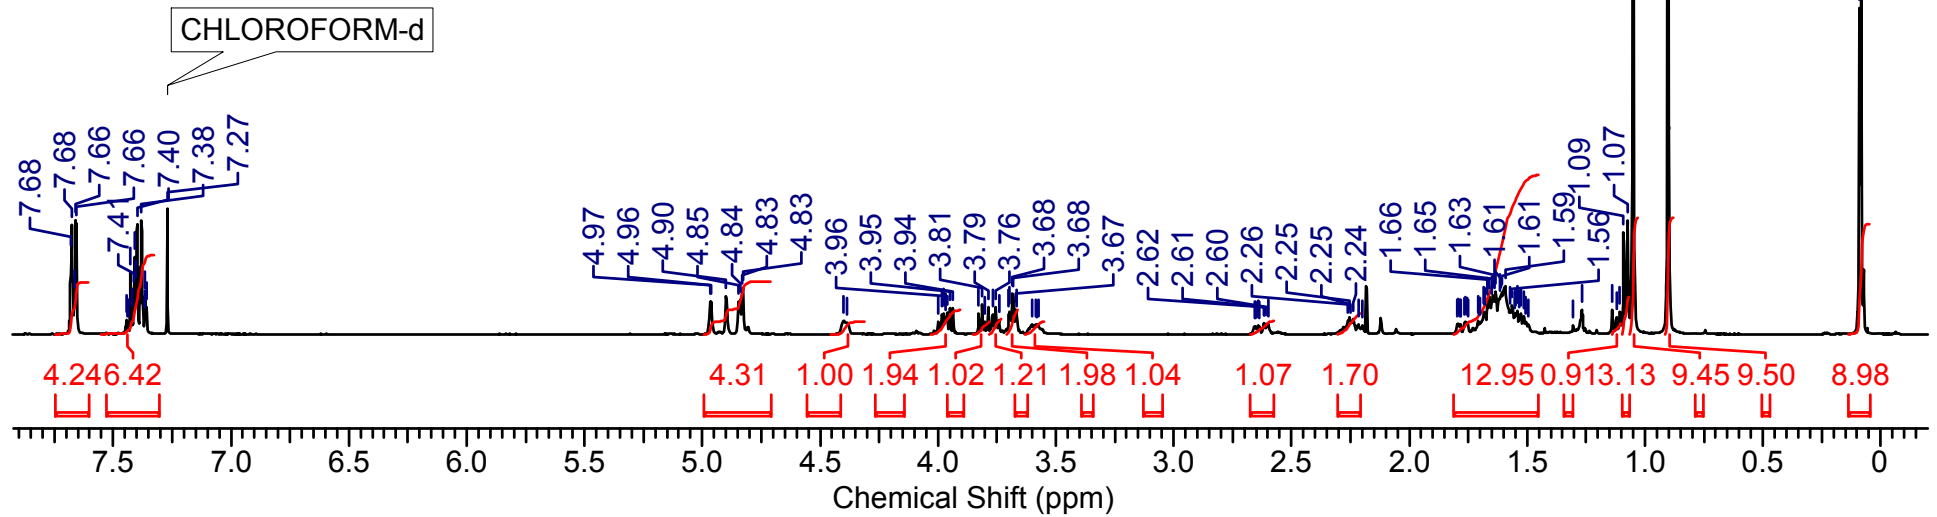

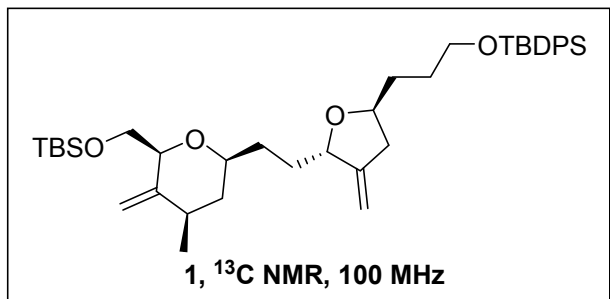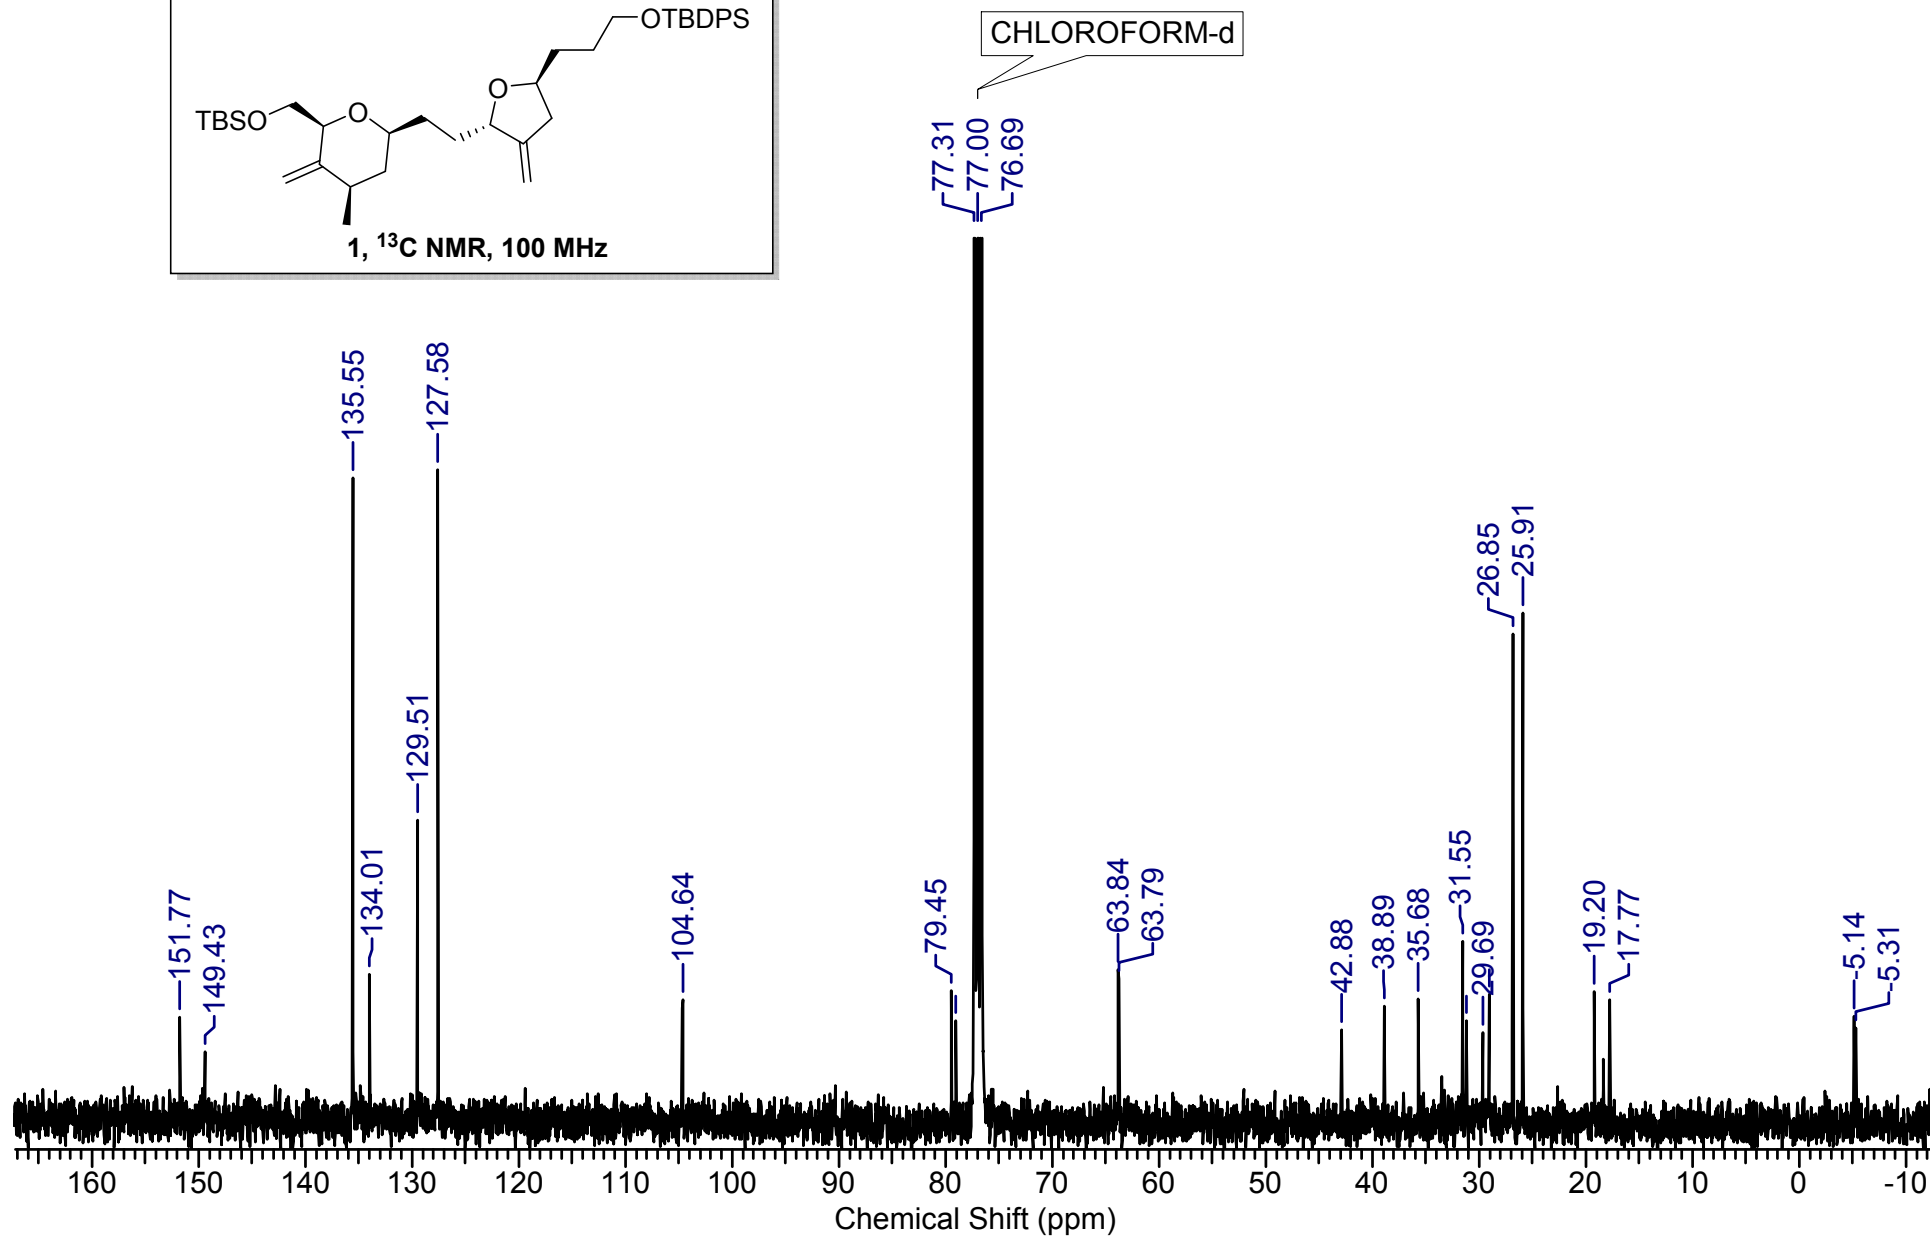

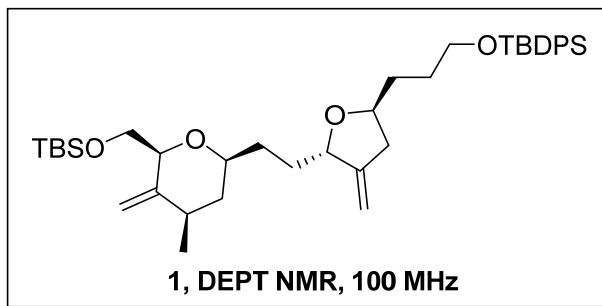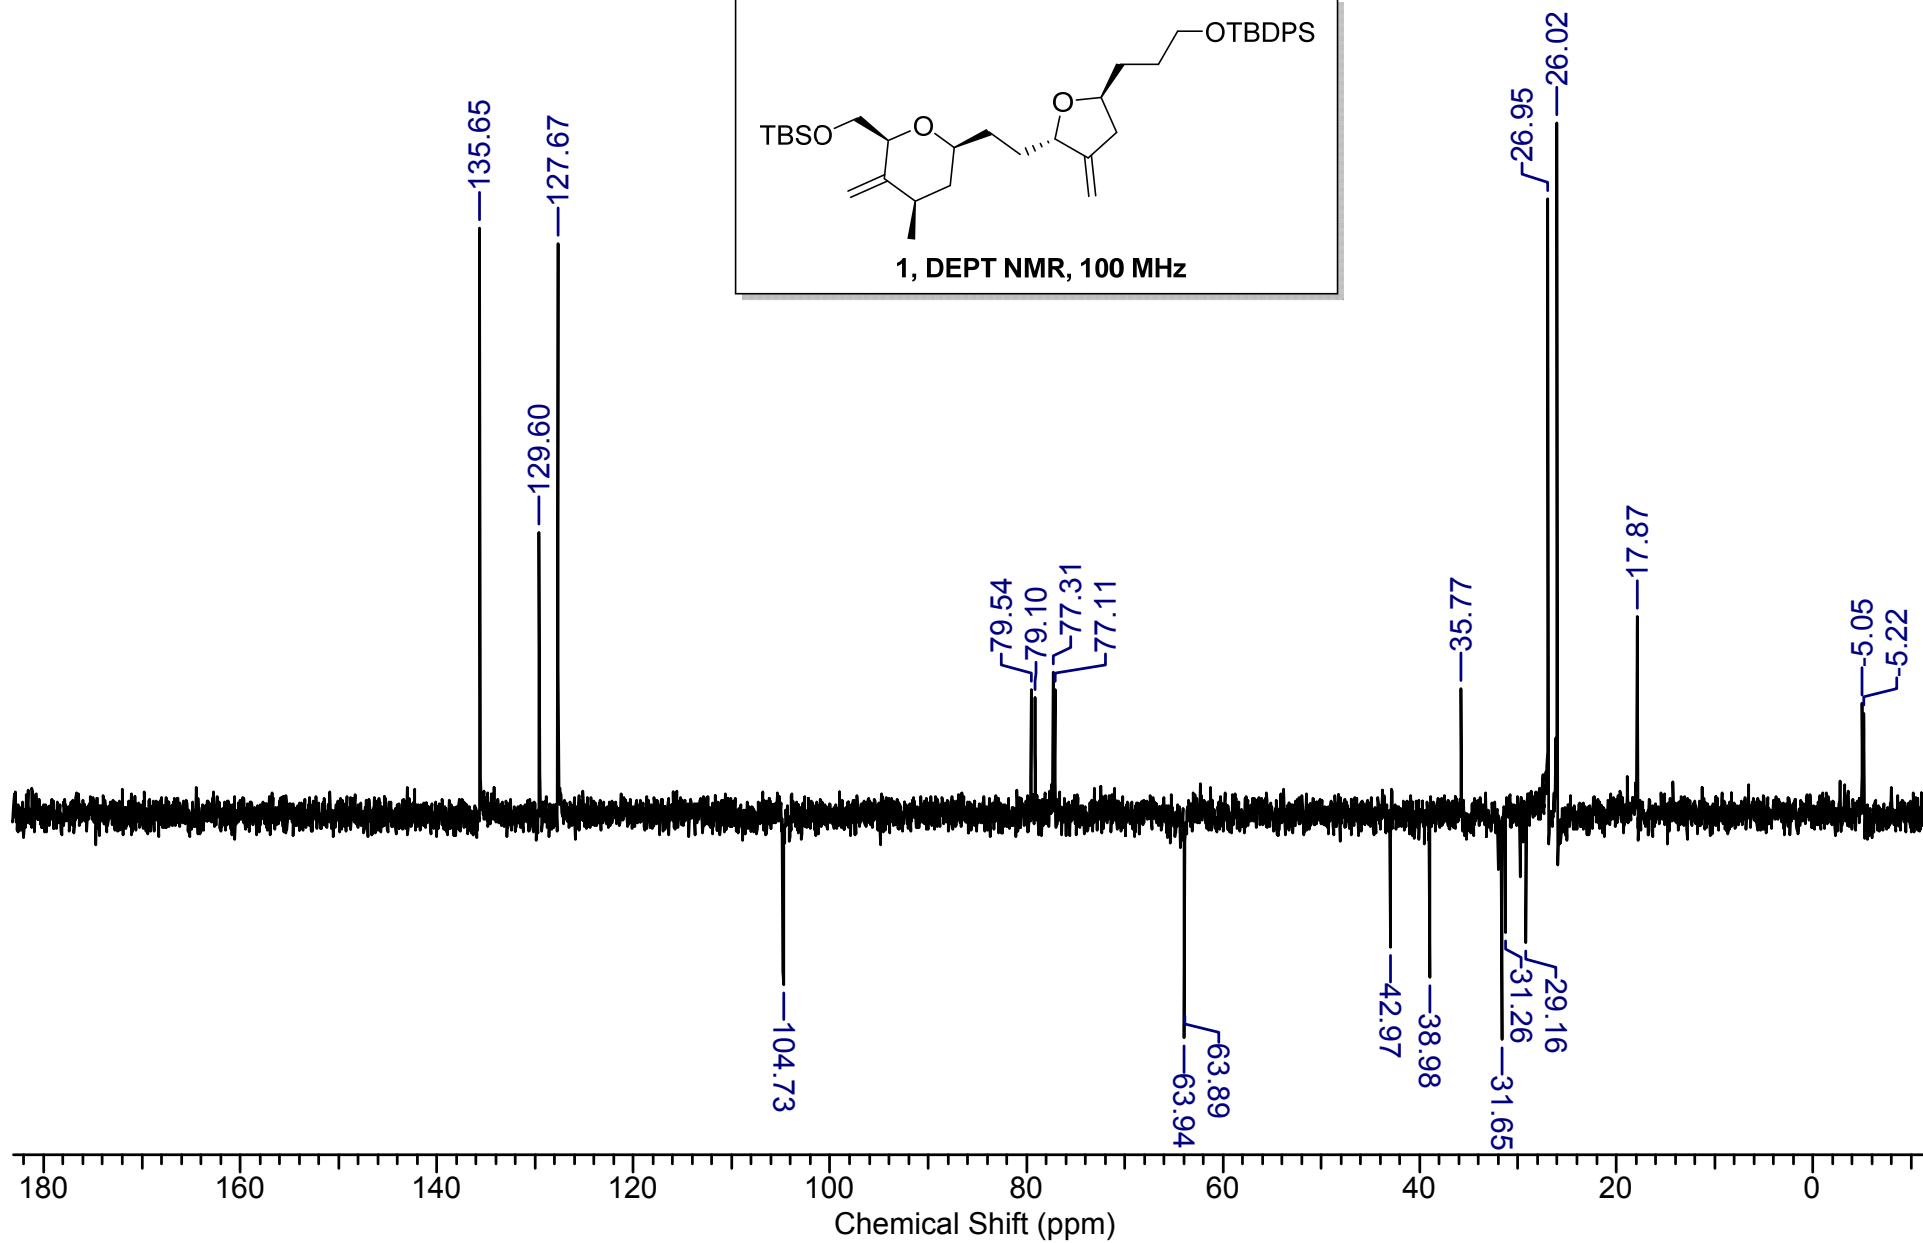

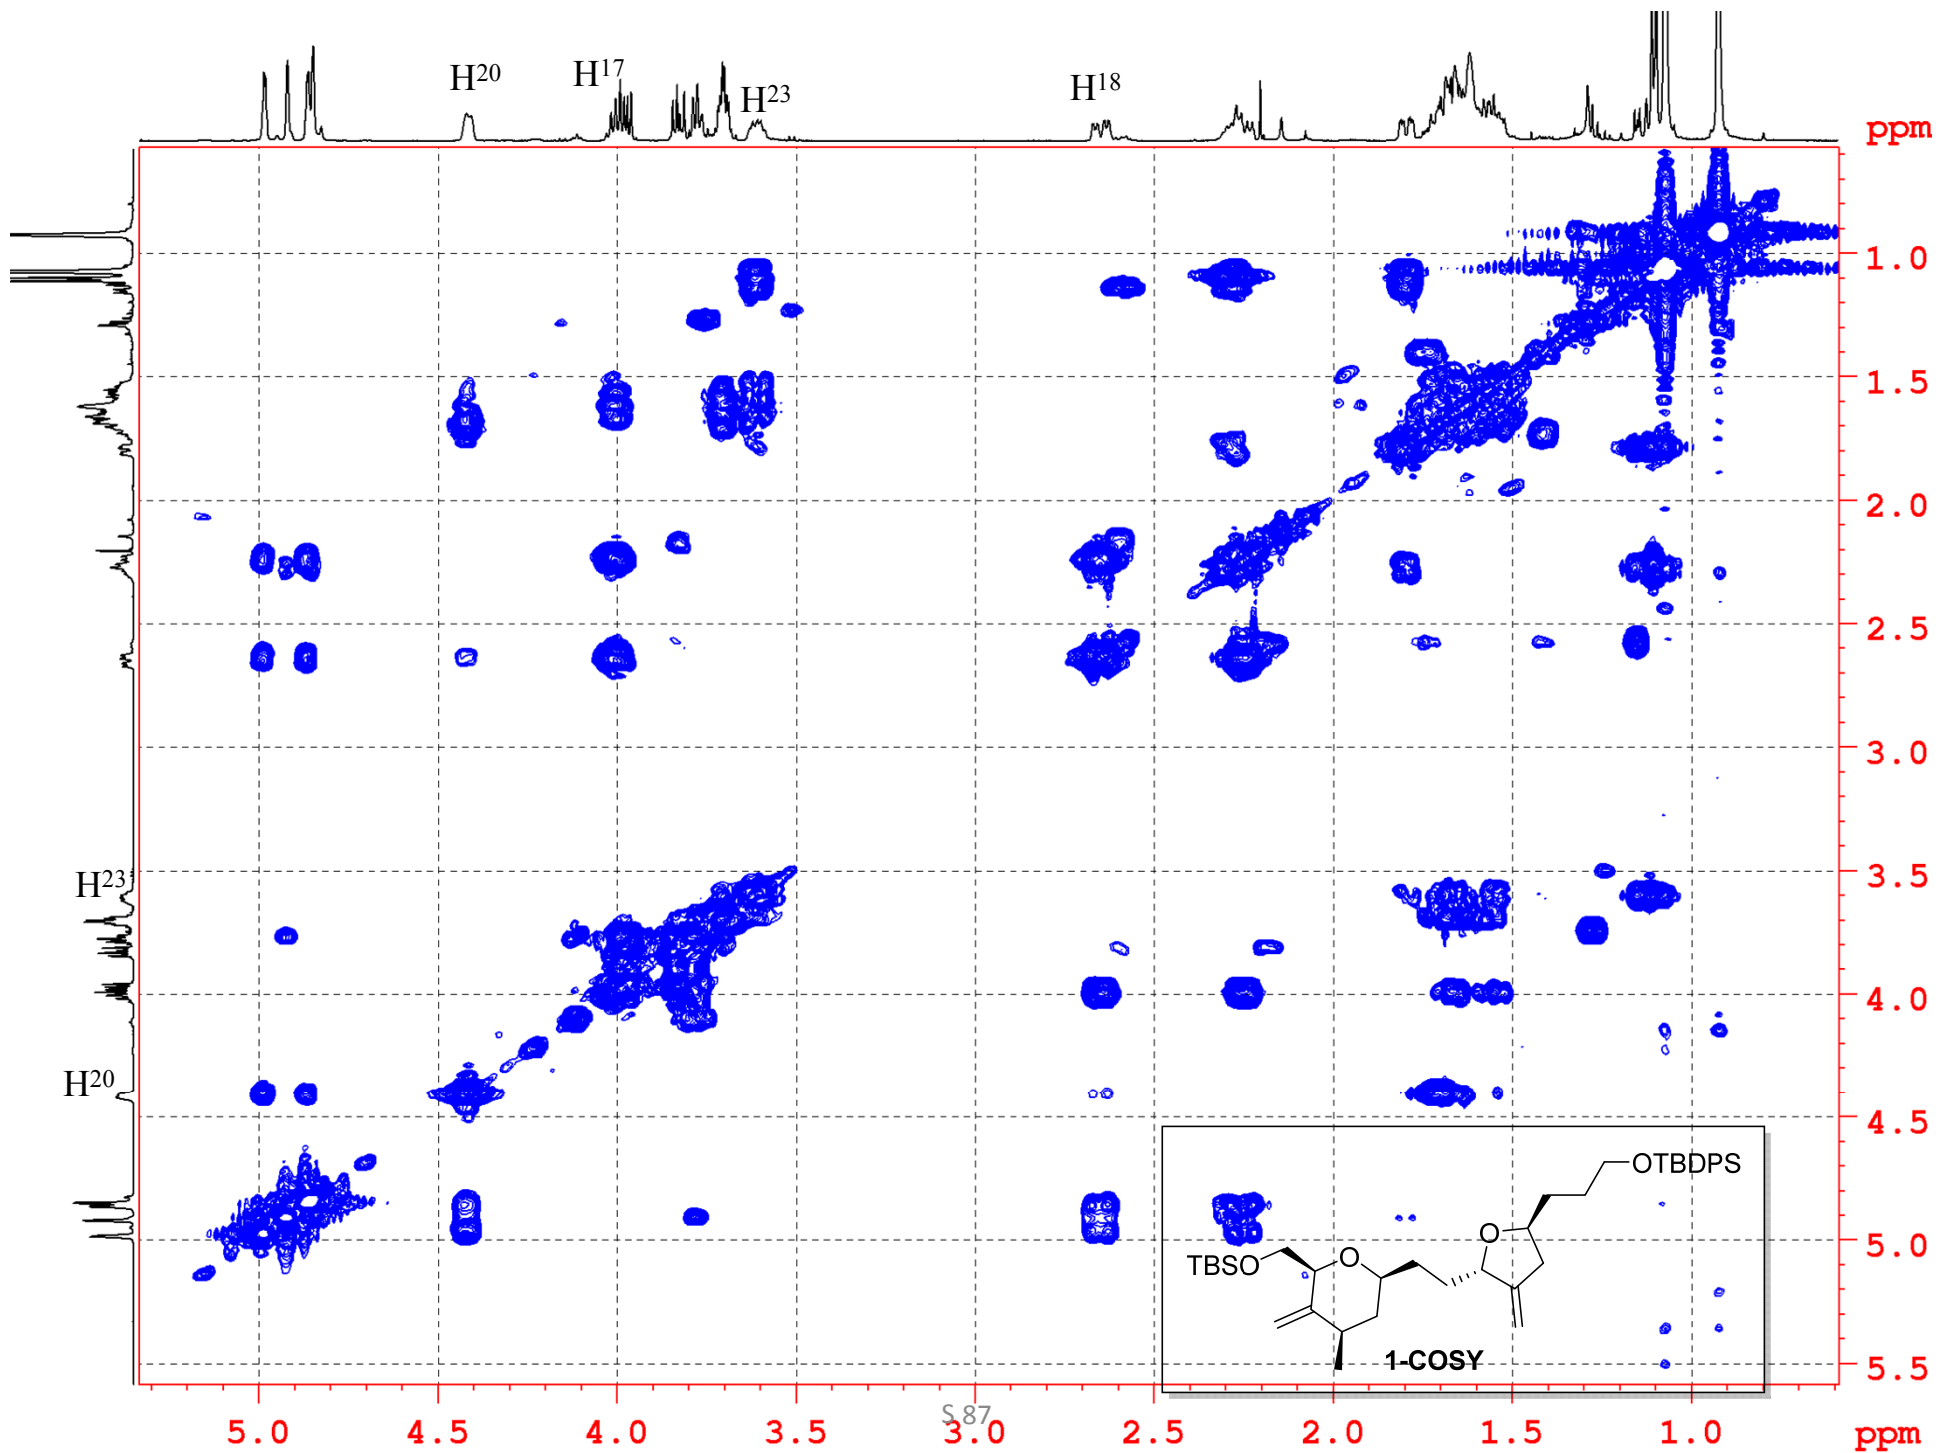

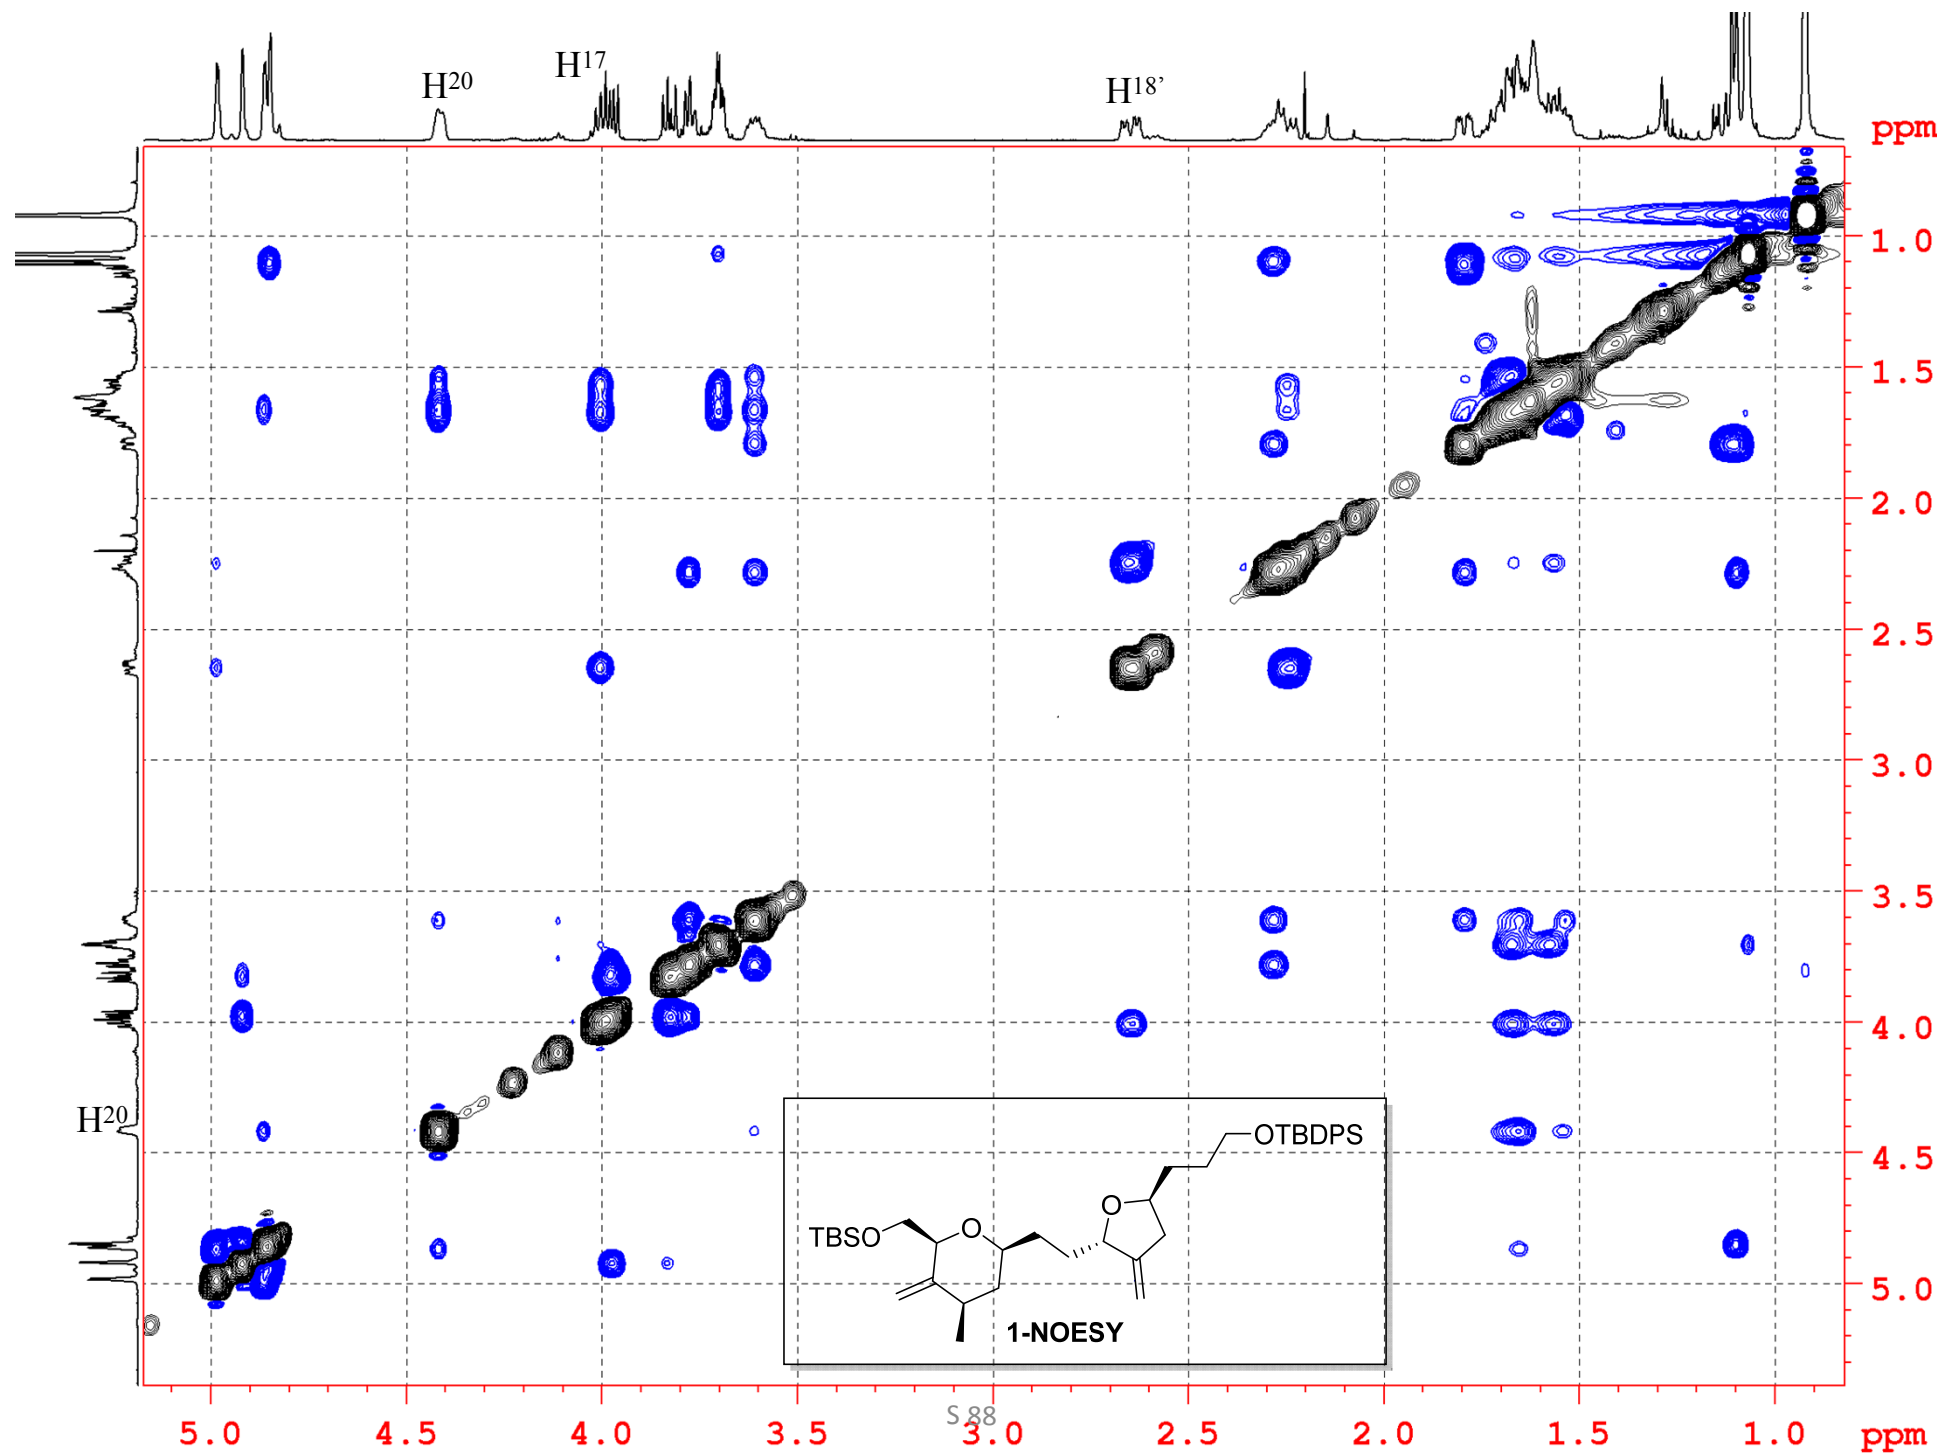



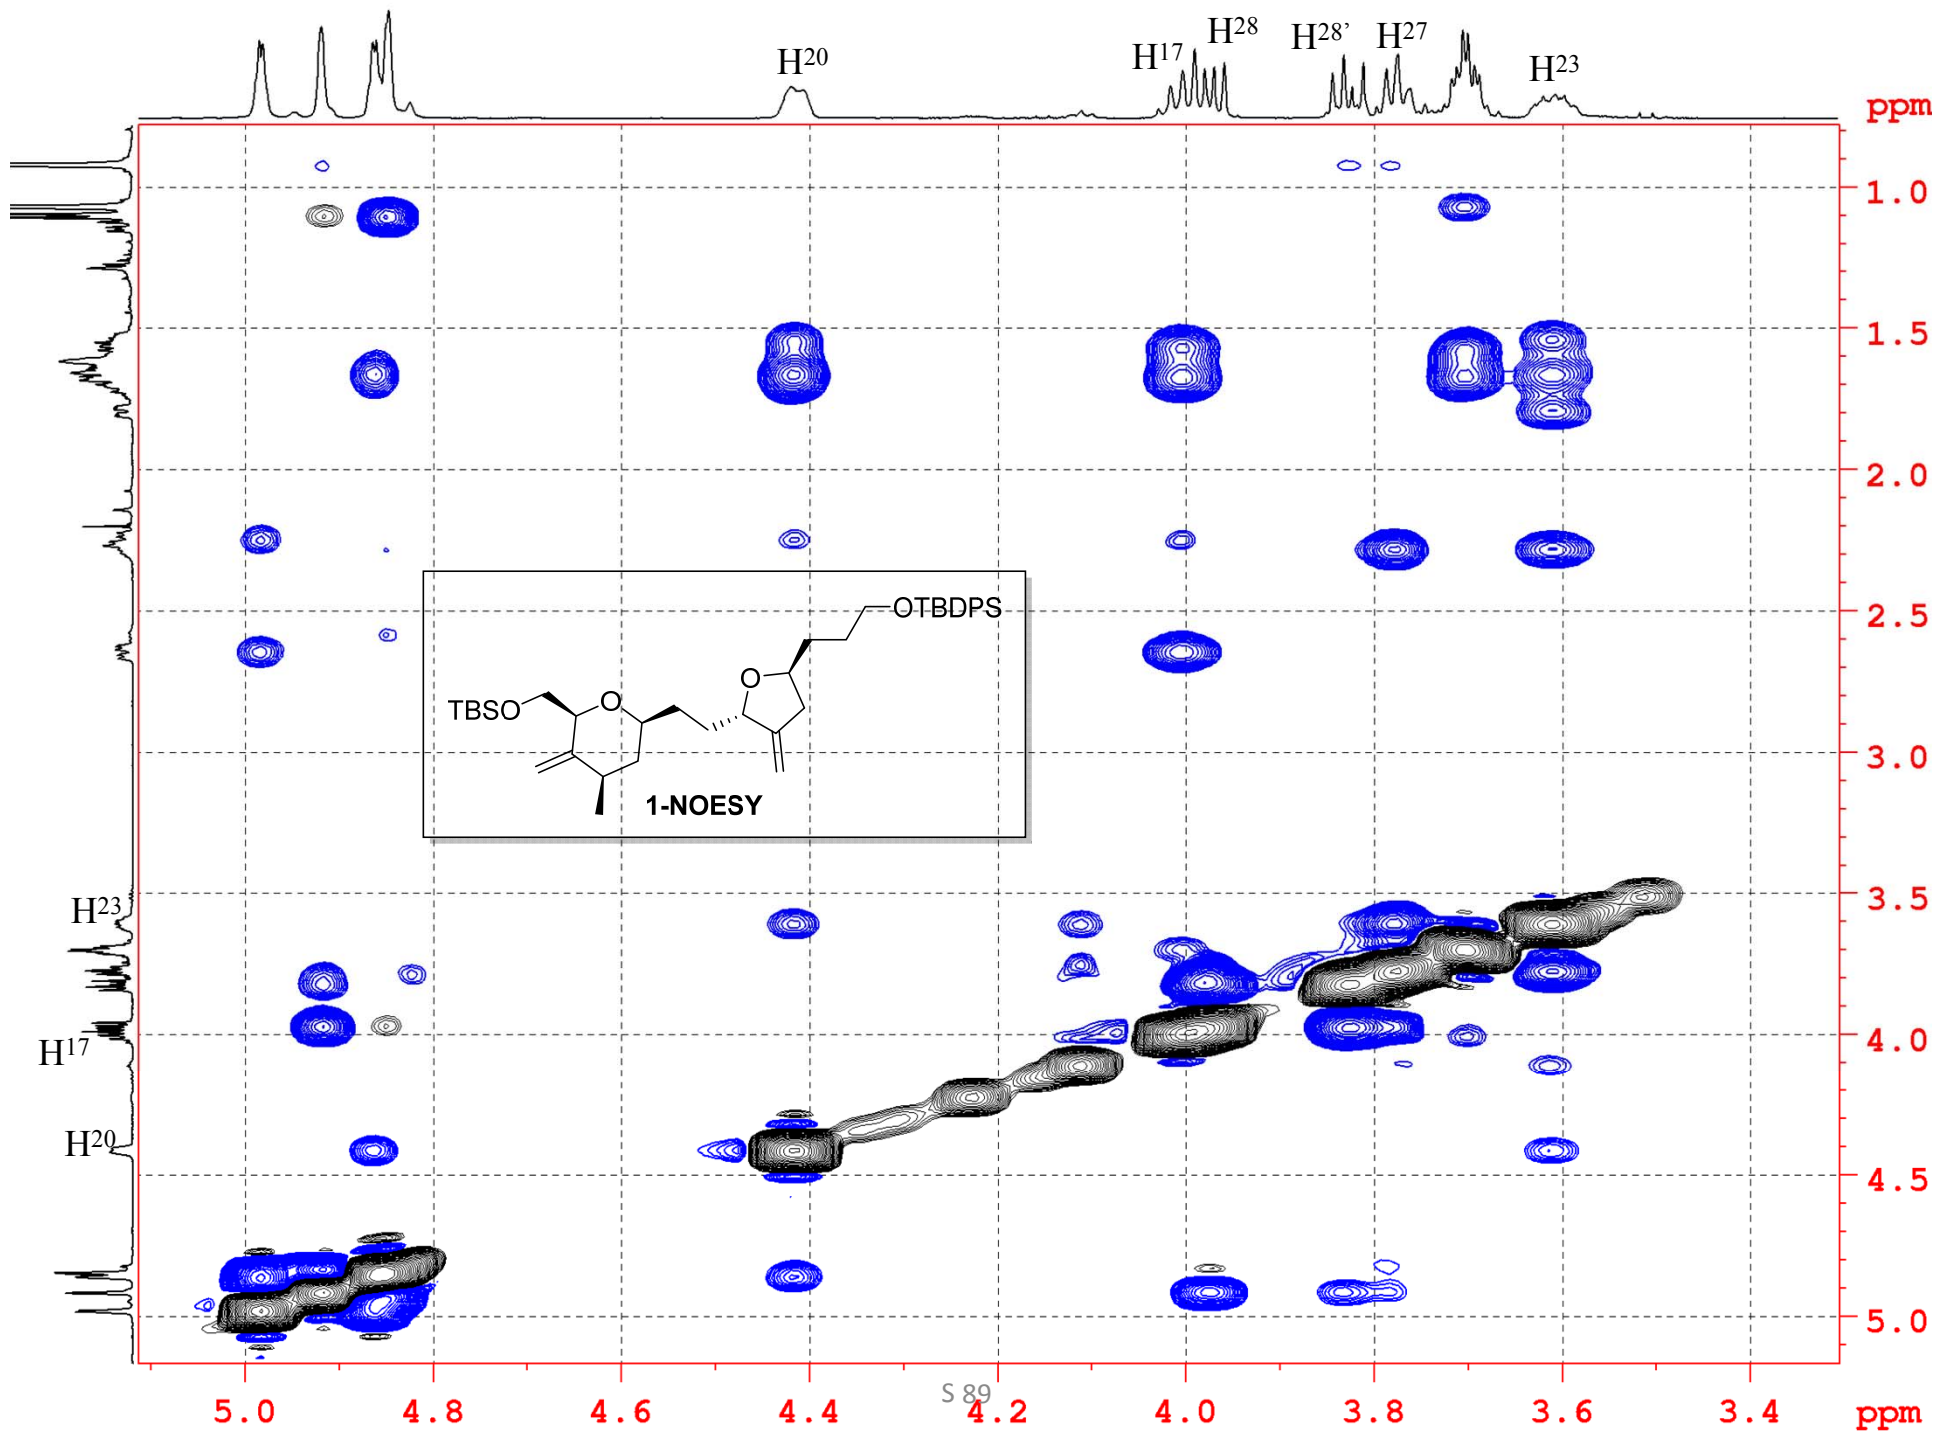

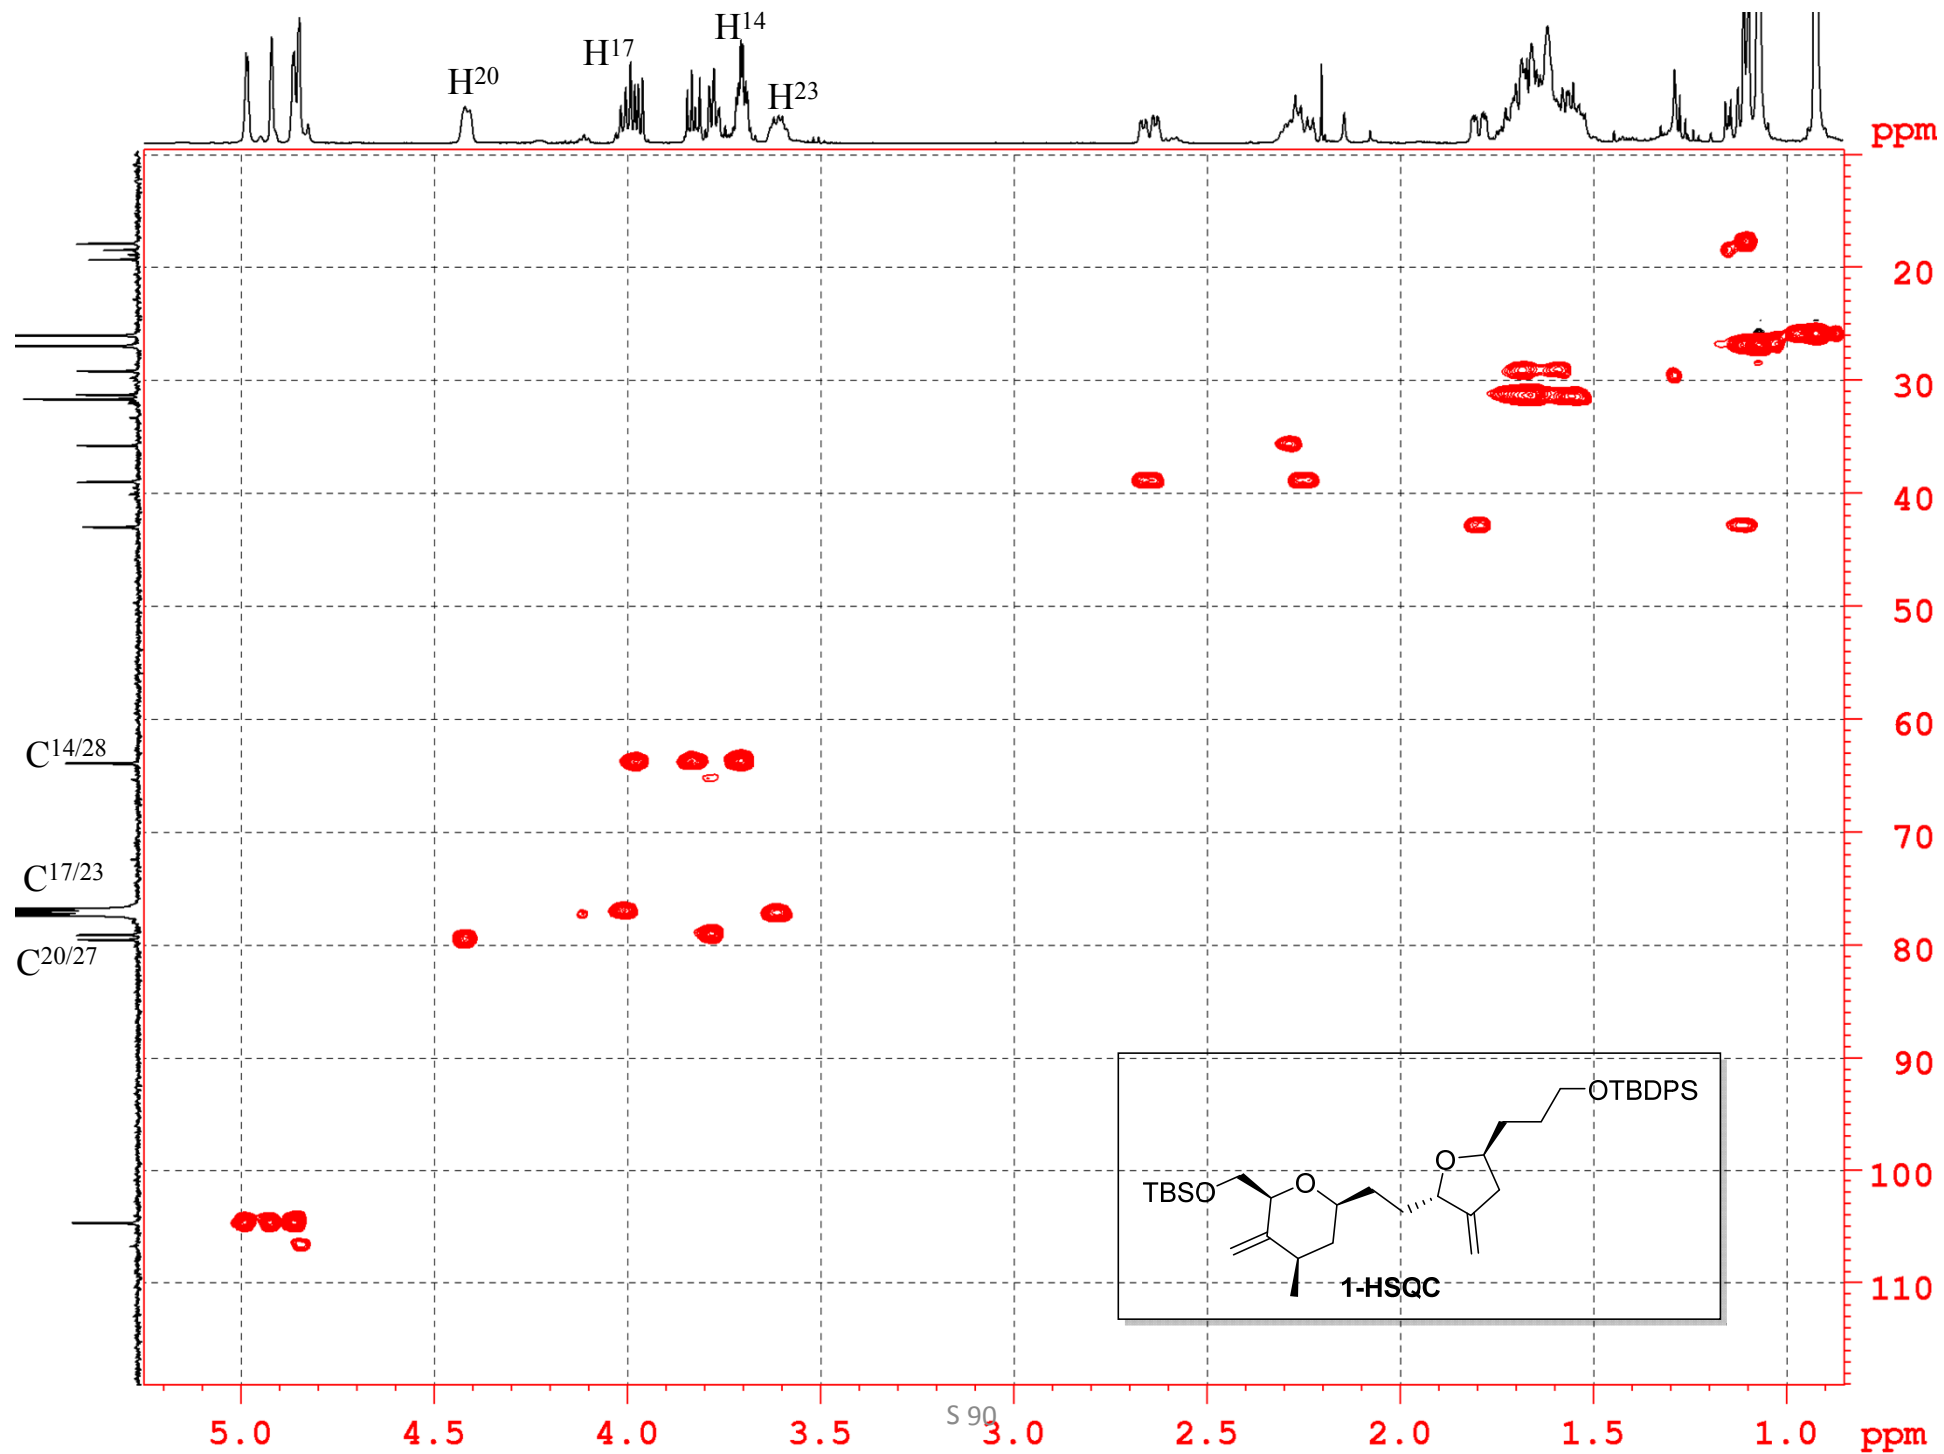

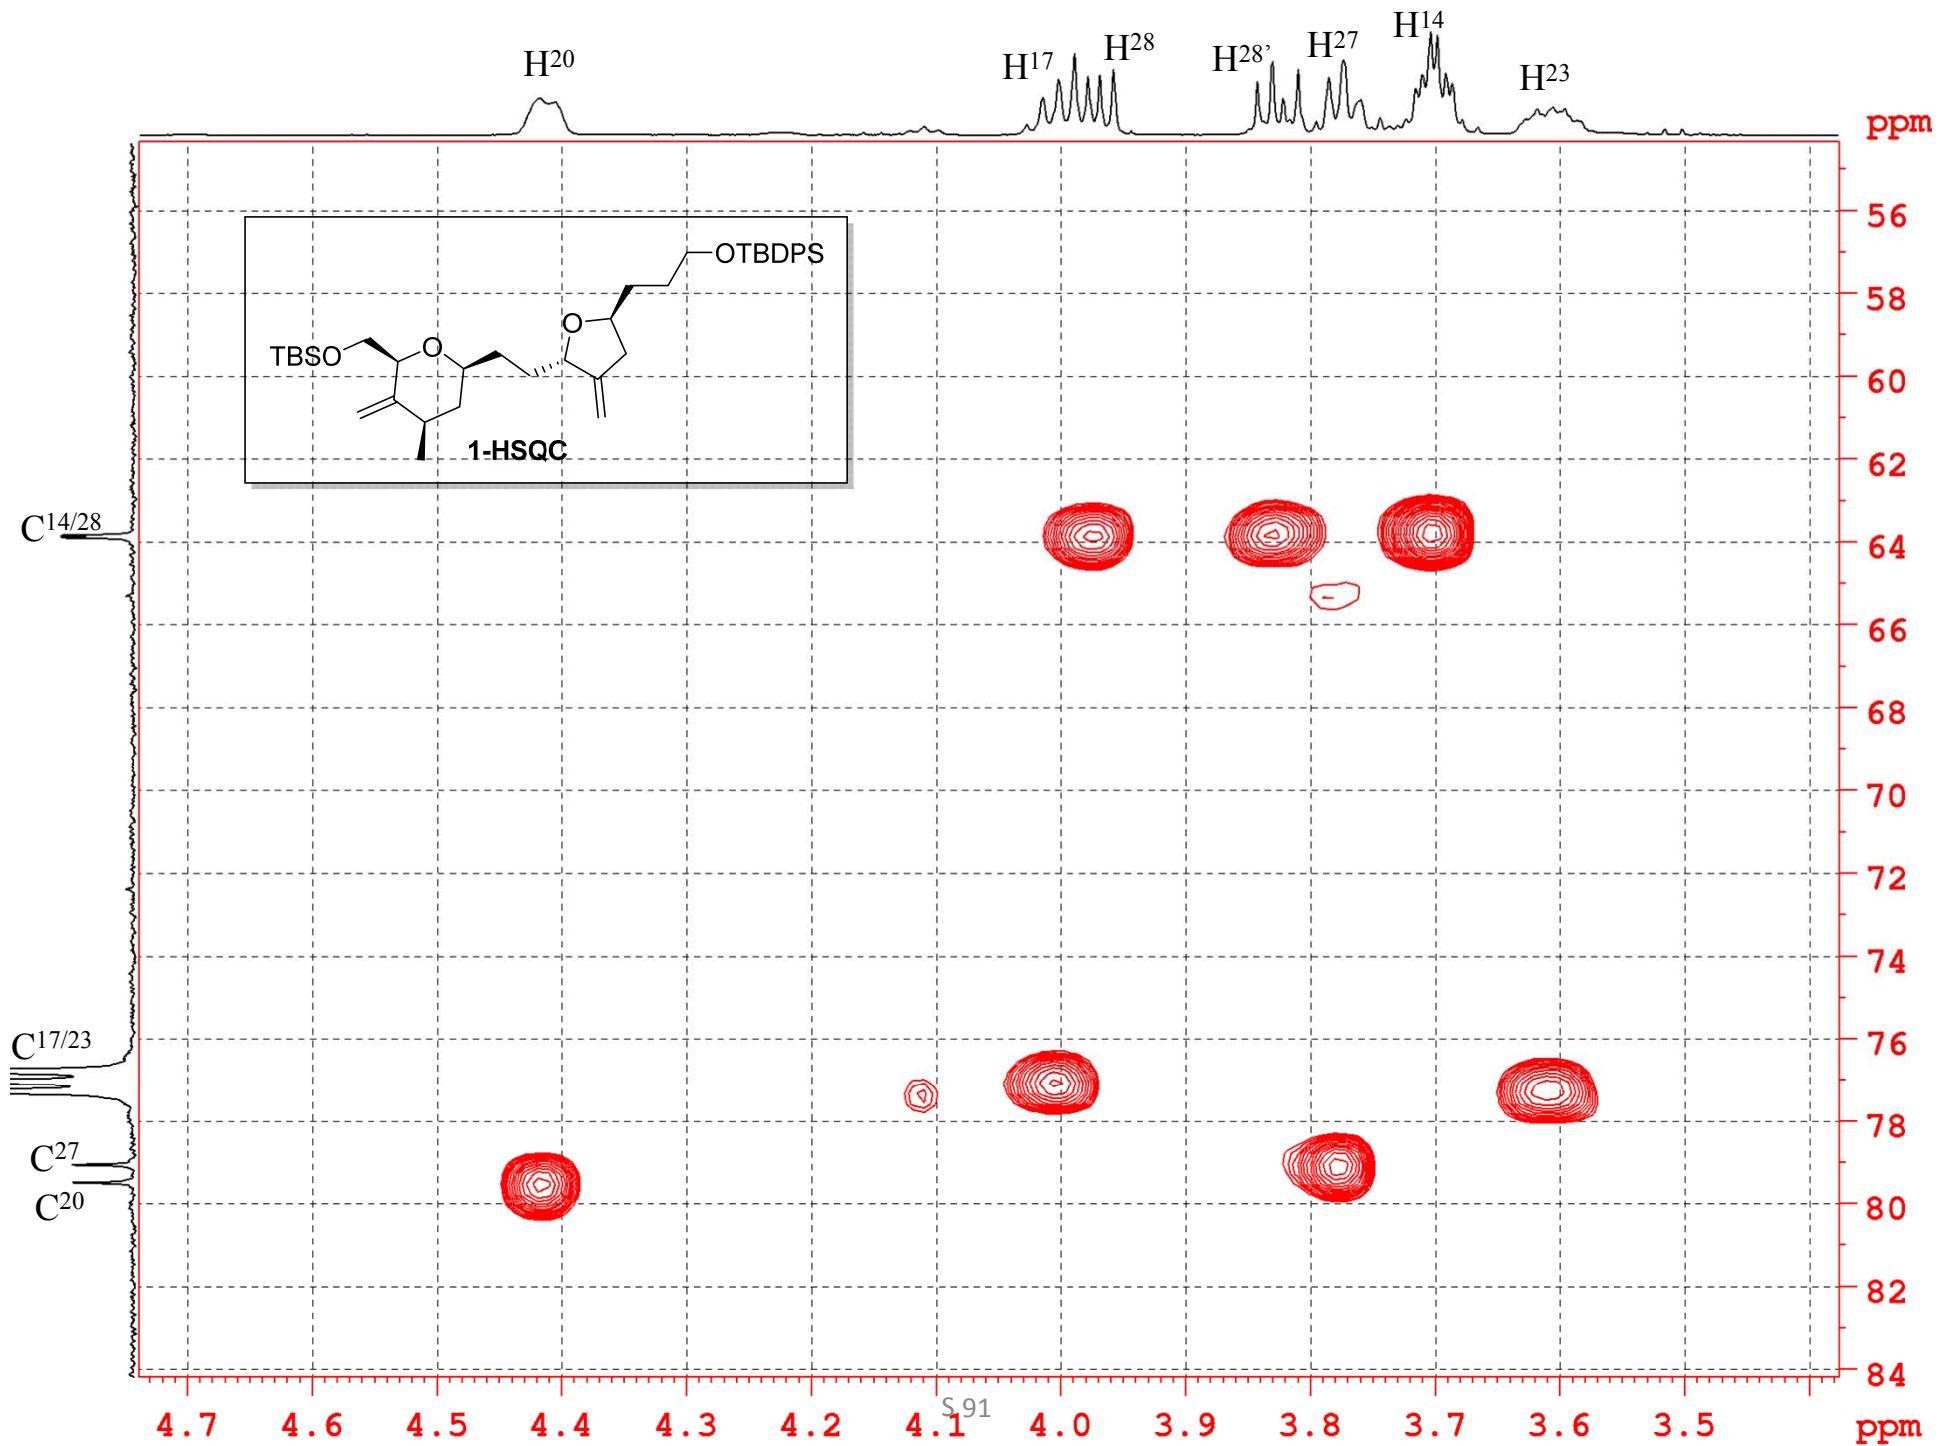

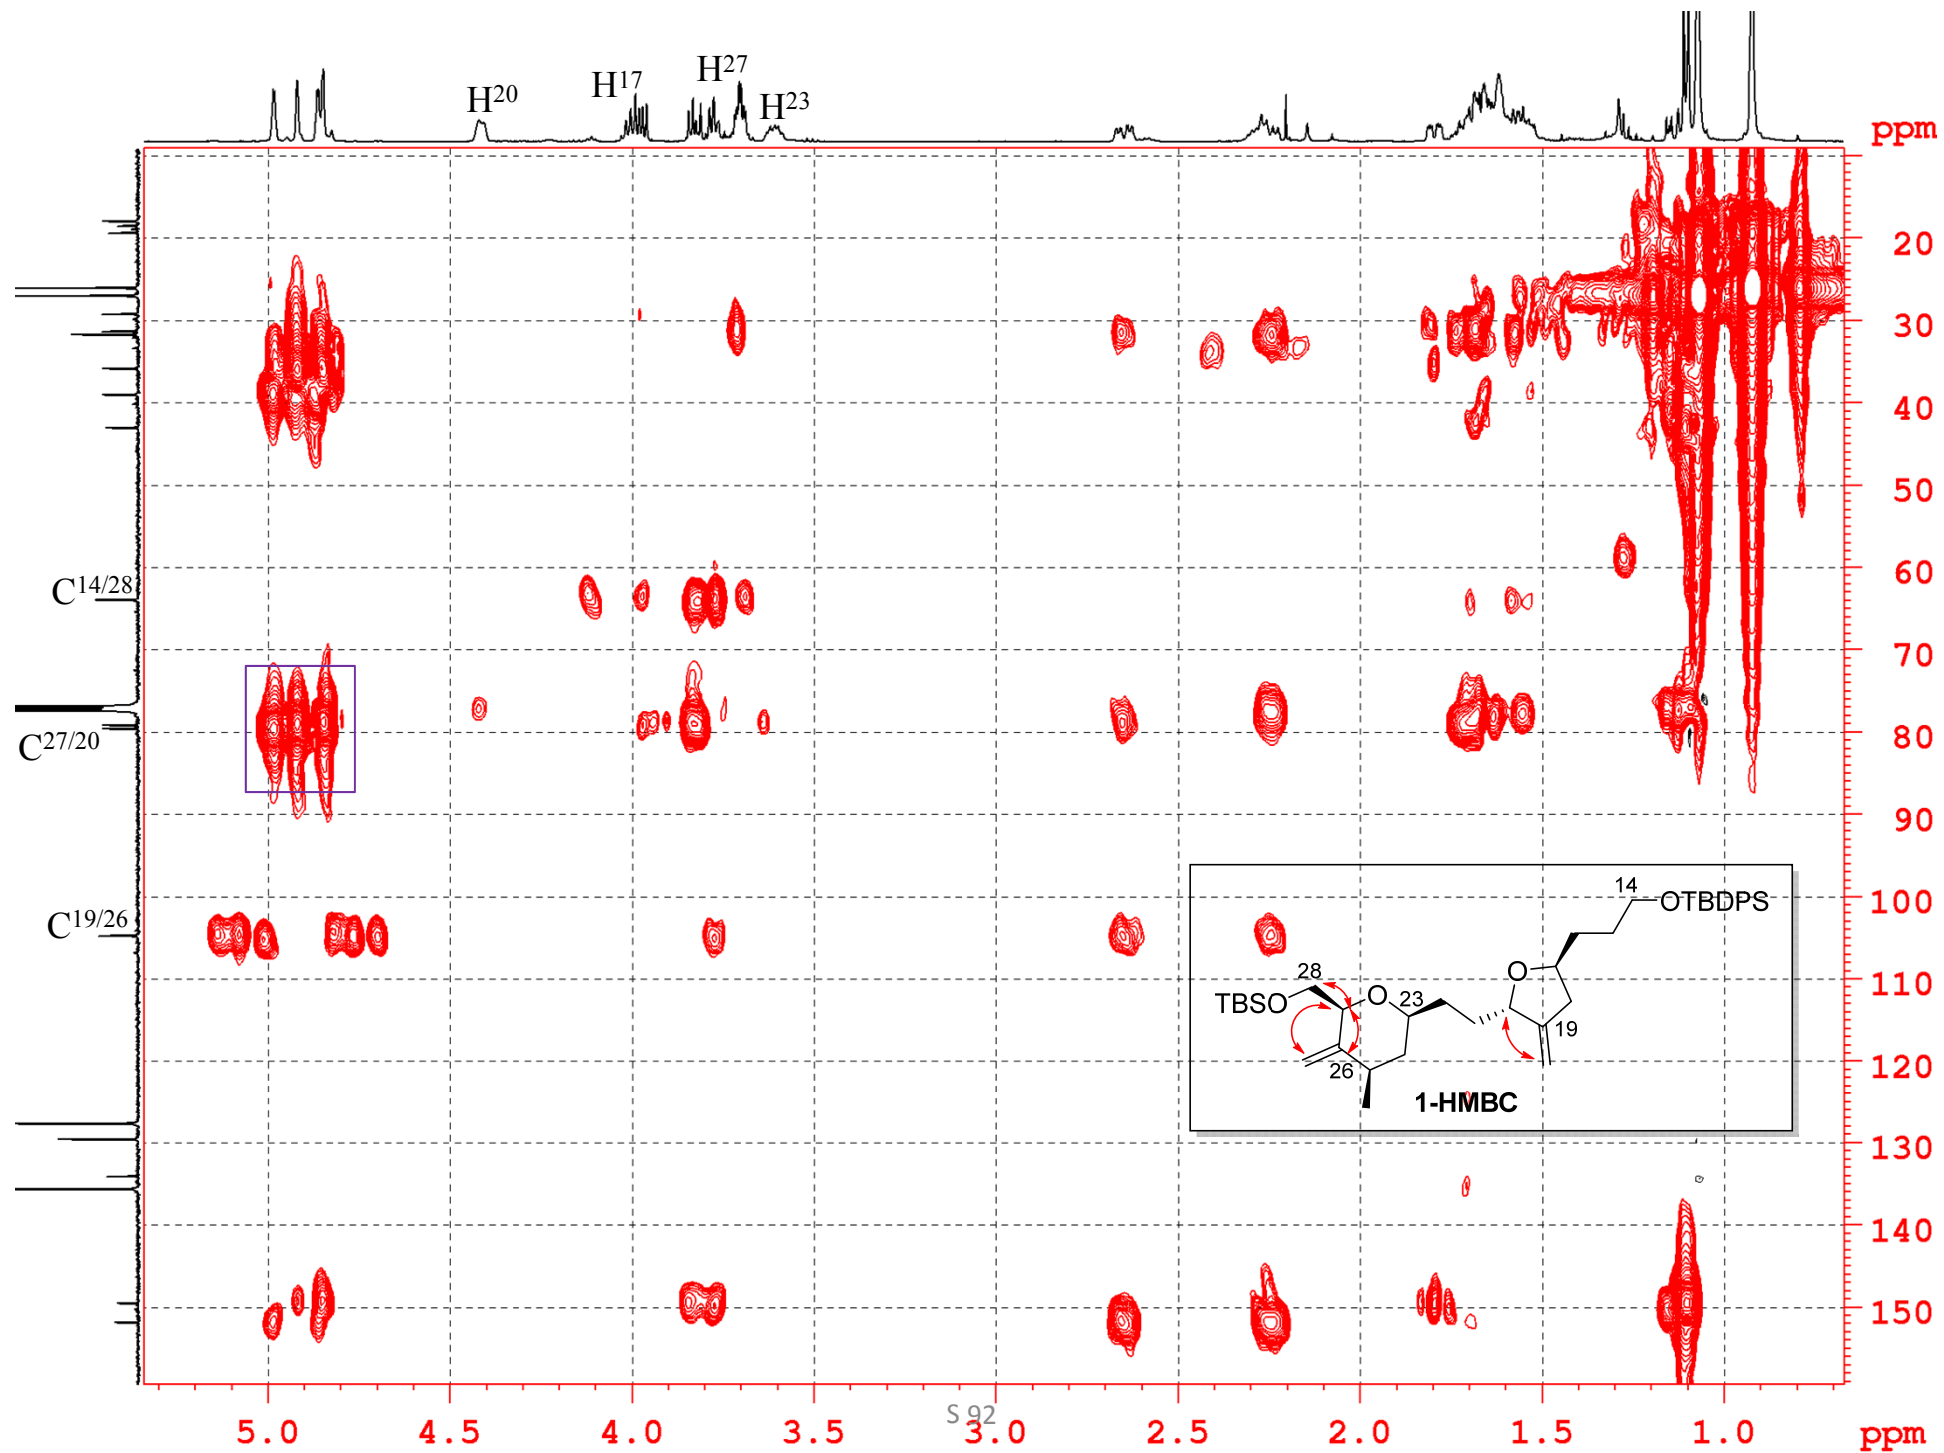

SS-631\_190830215908 #686 RT: 3.70 AV: 1 NL: 9.03E7  
T: FTMS + p ESI Full ms [100.0000-1500.0000]

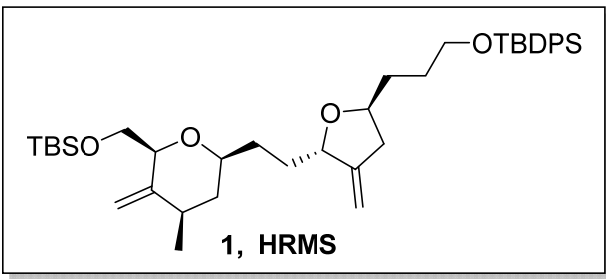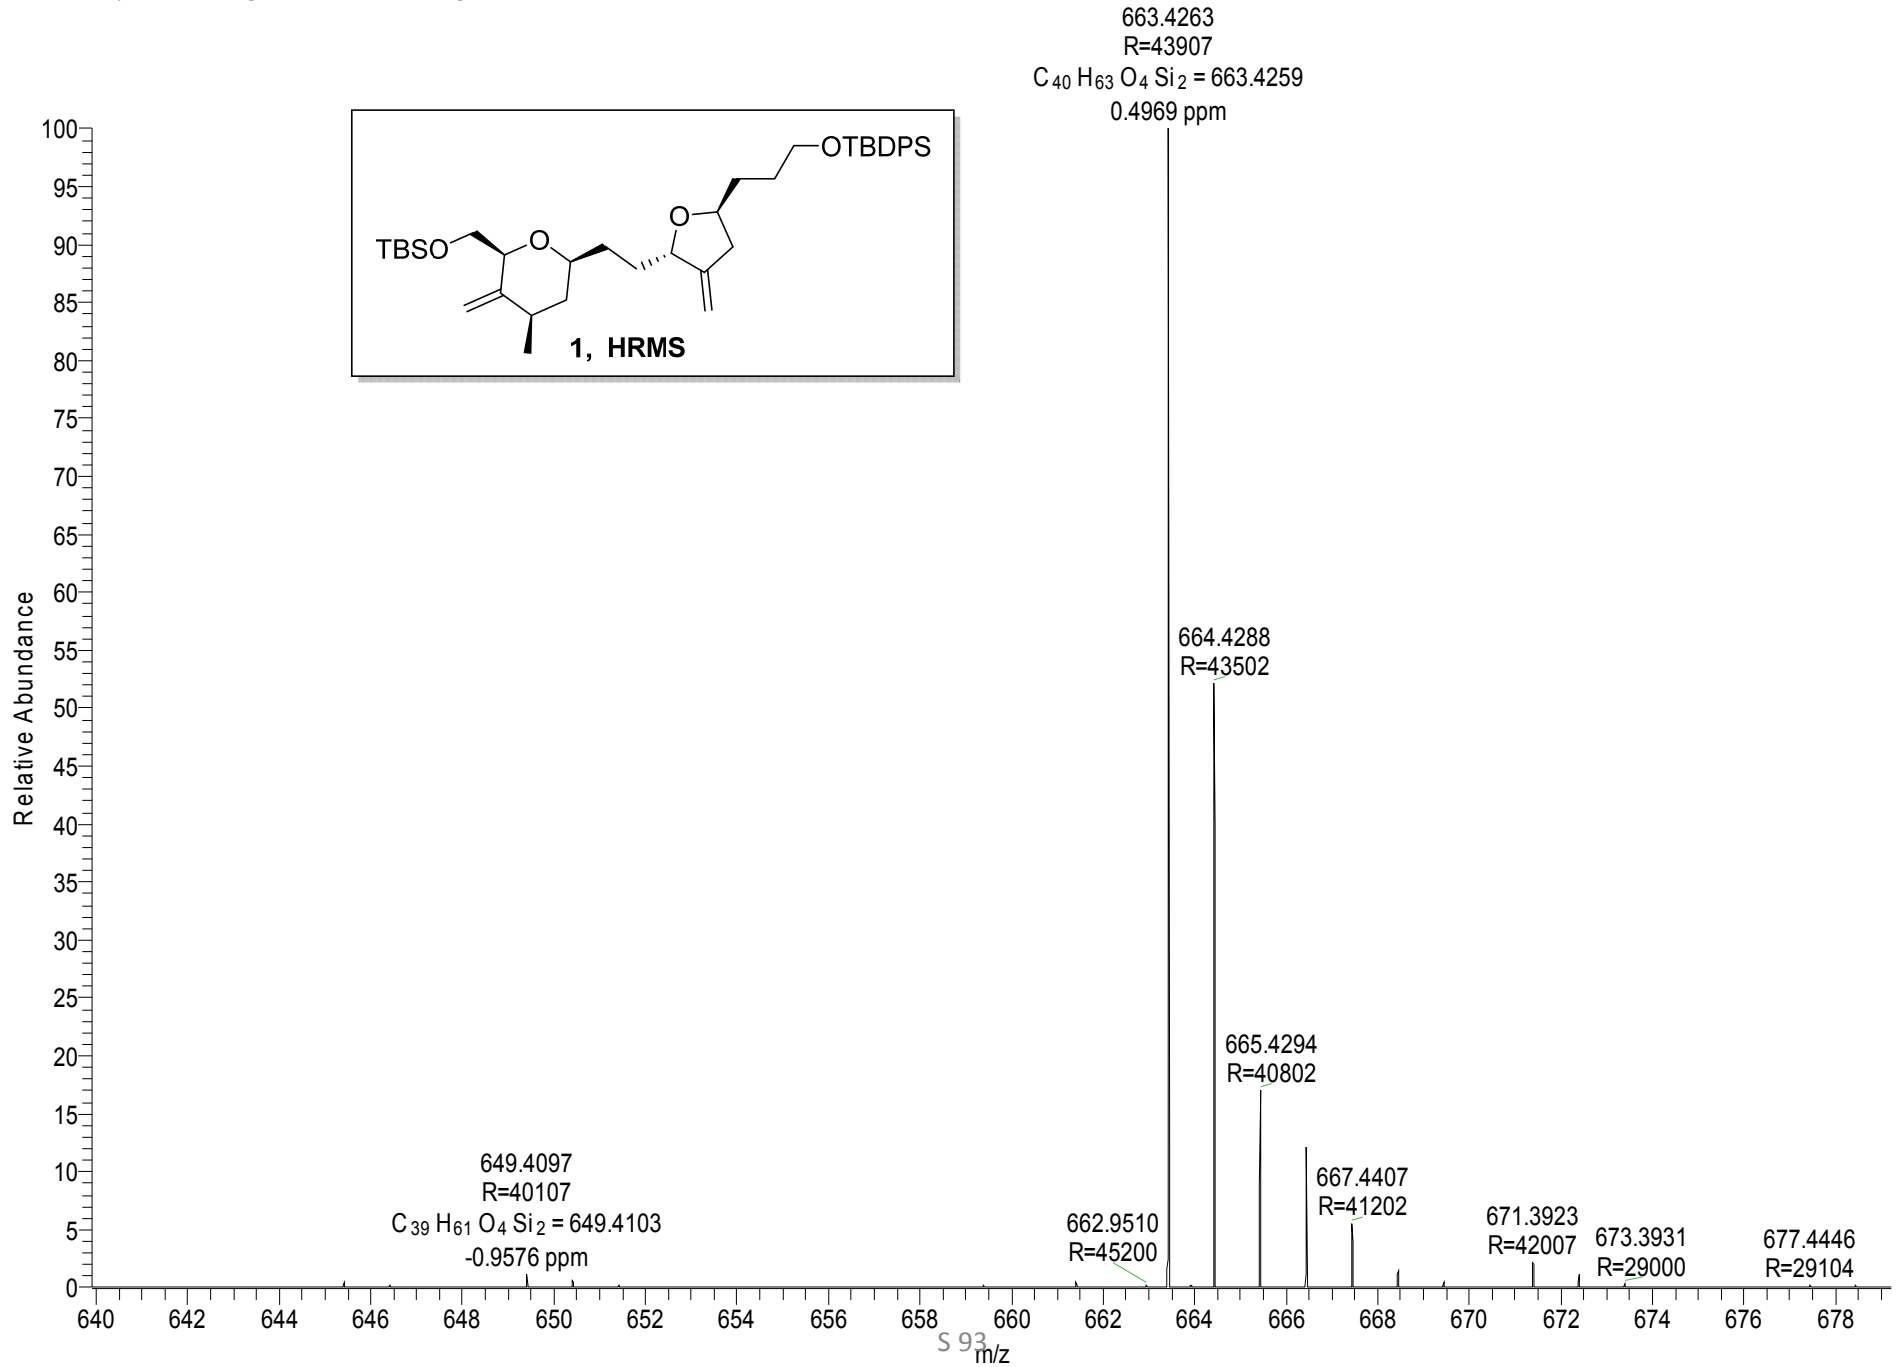

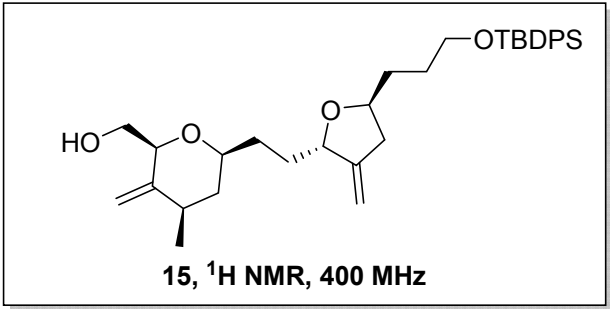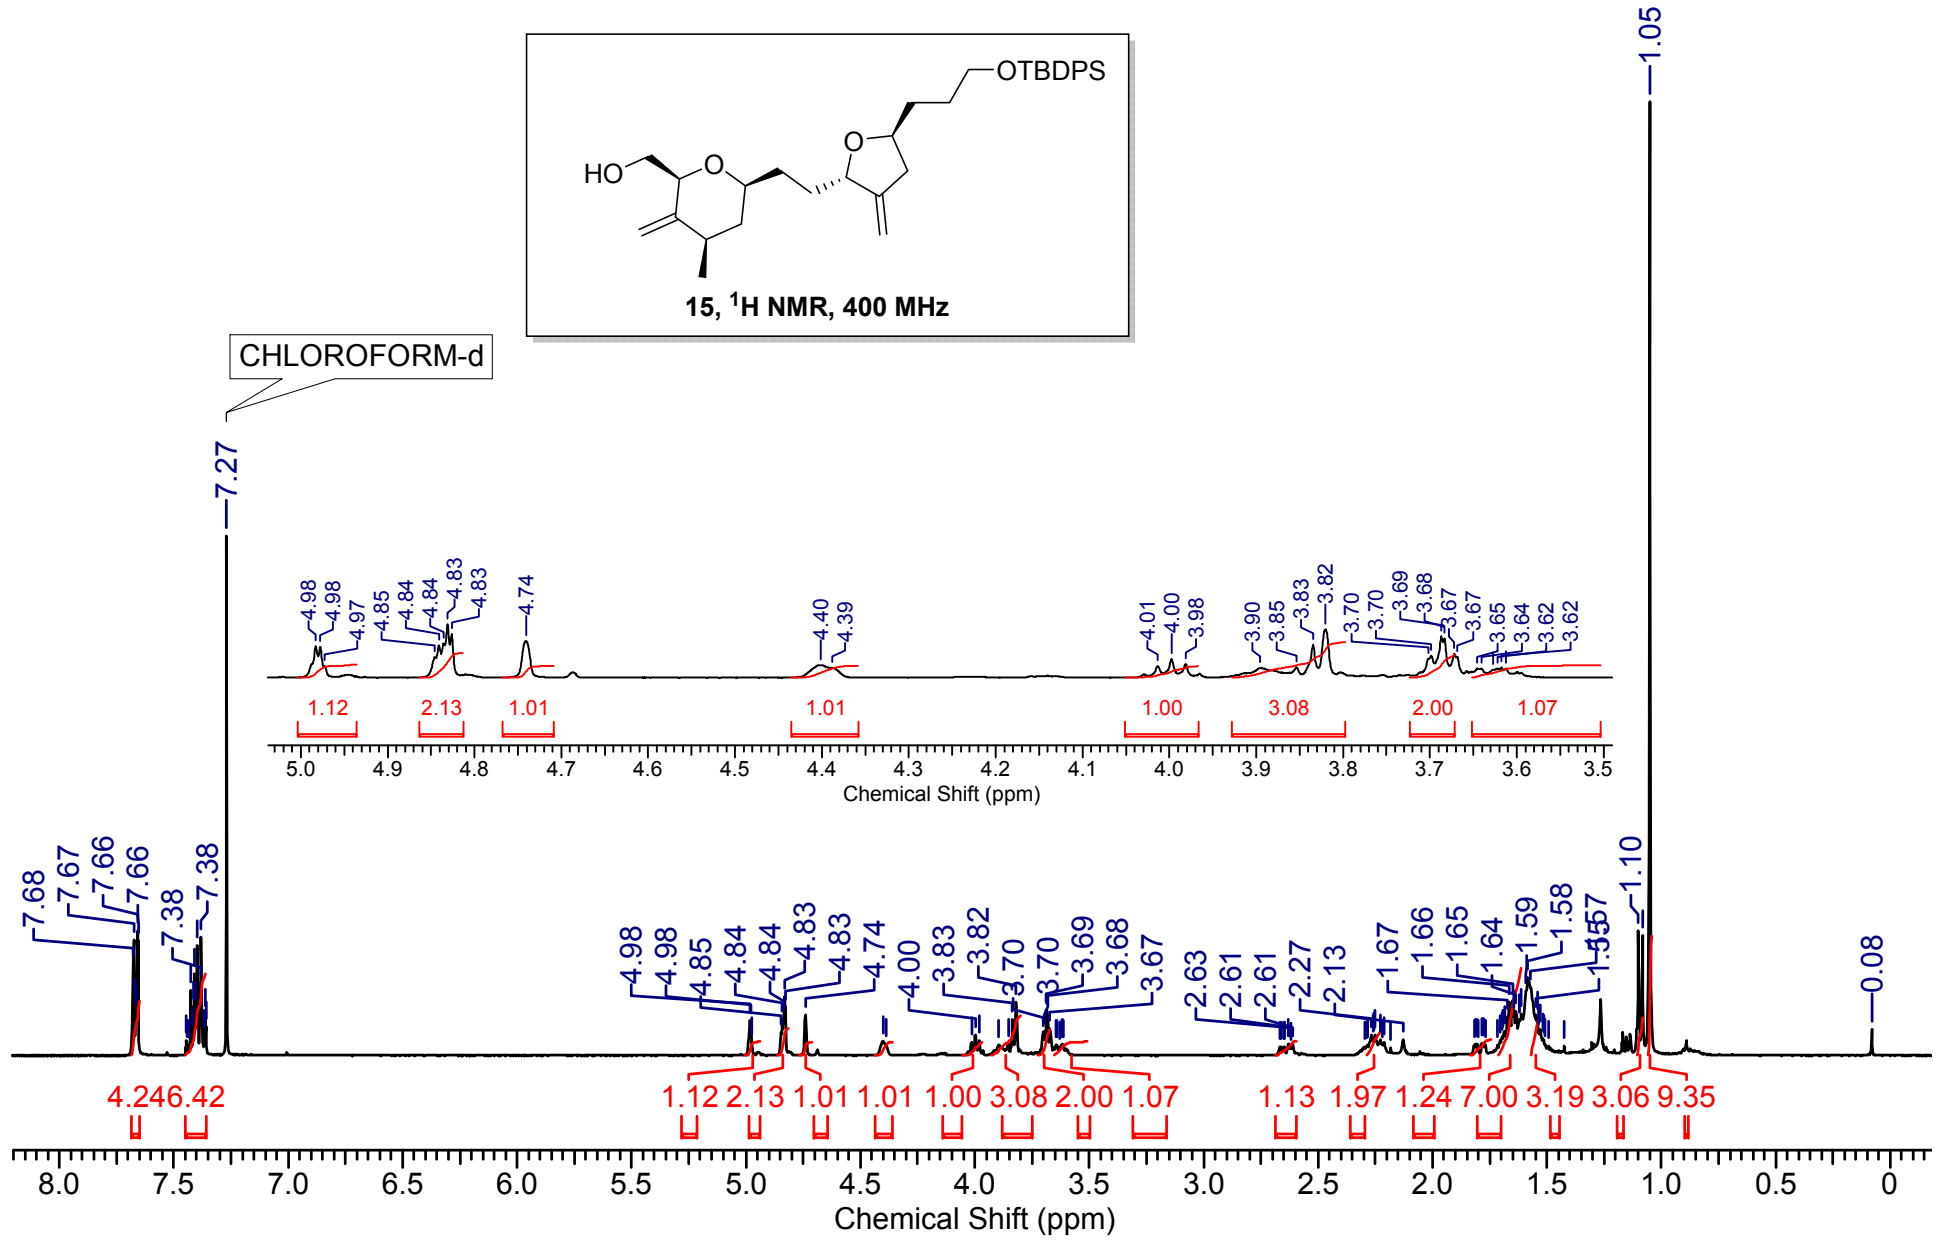

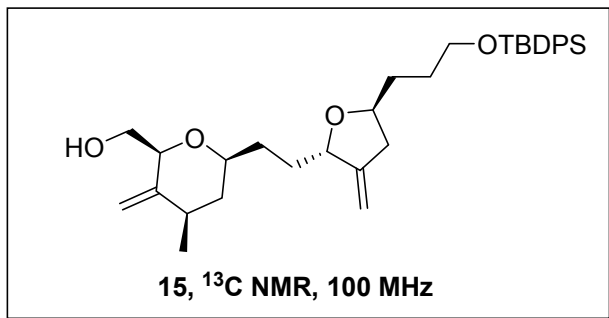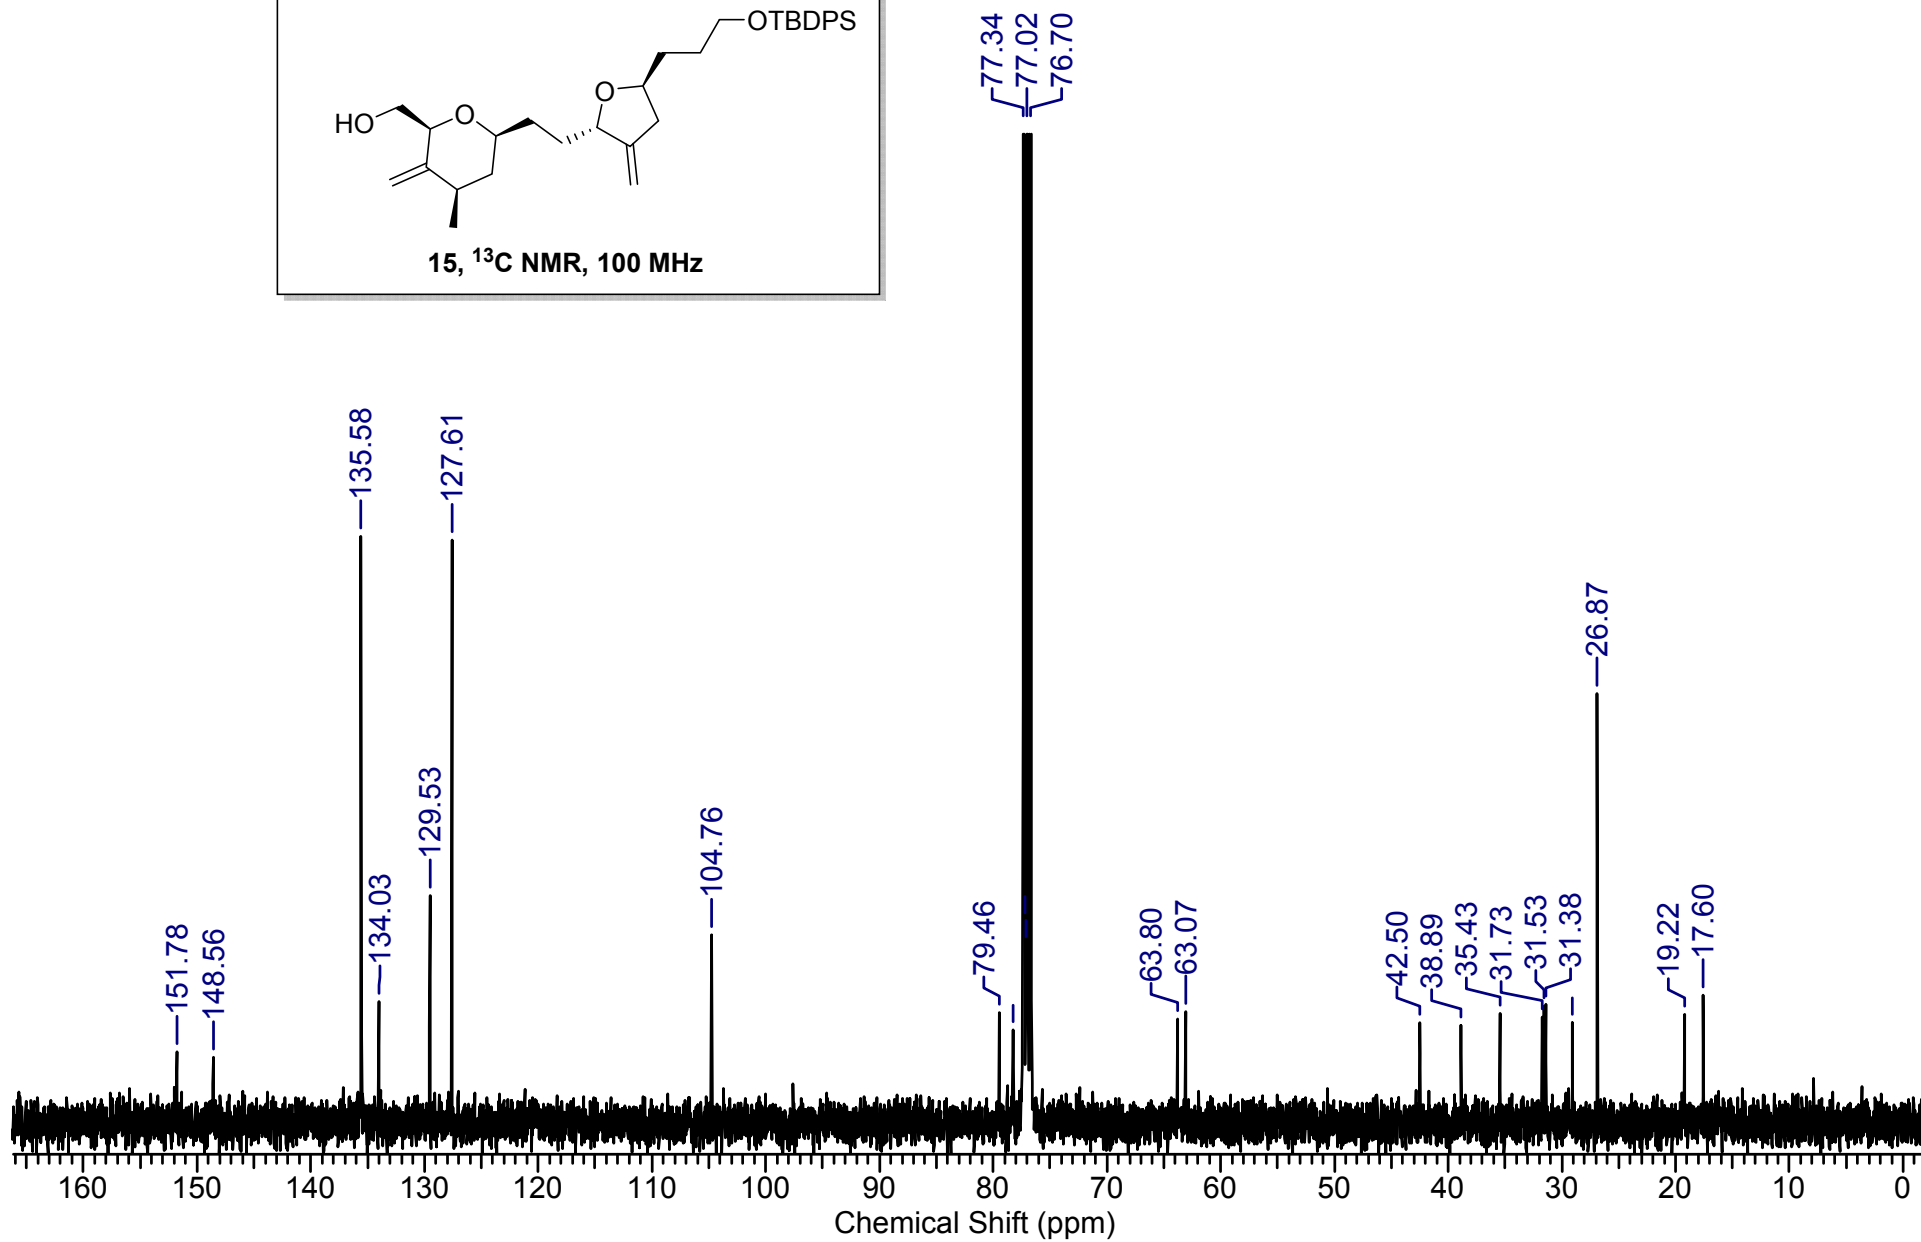

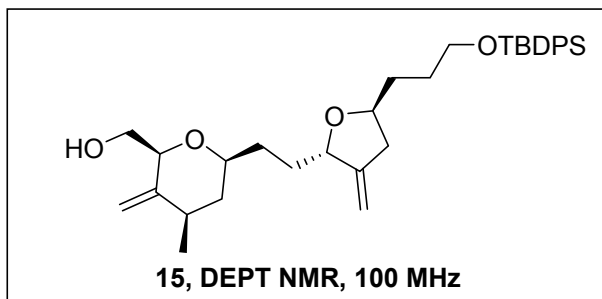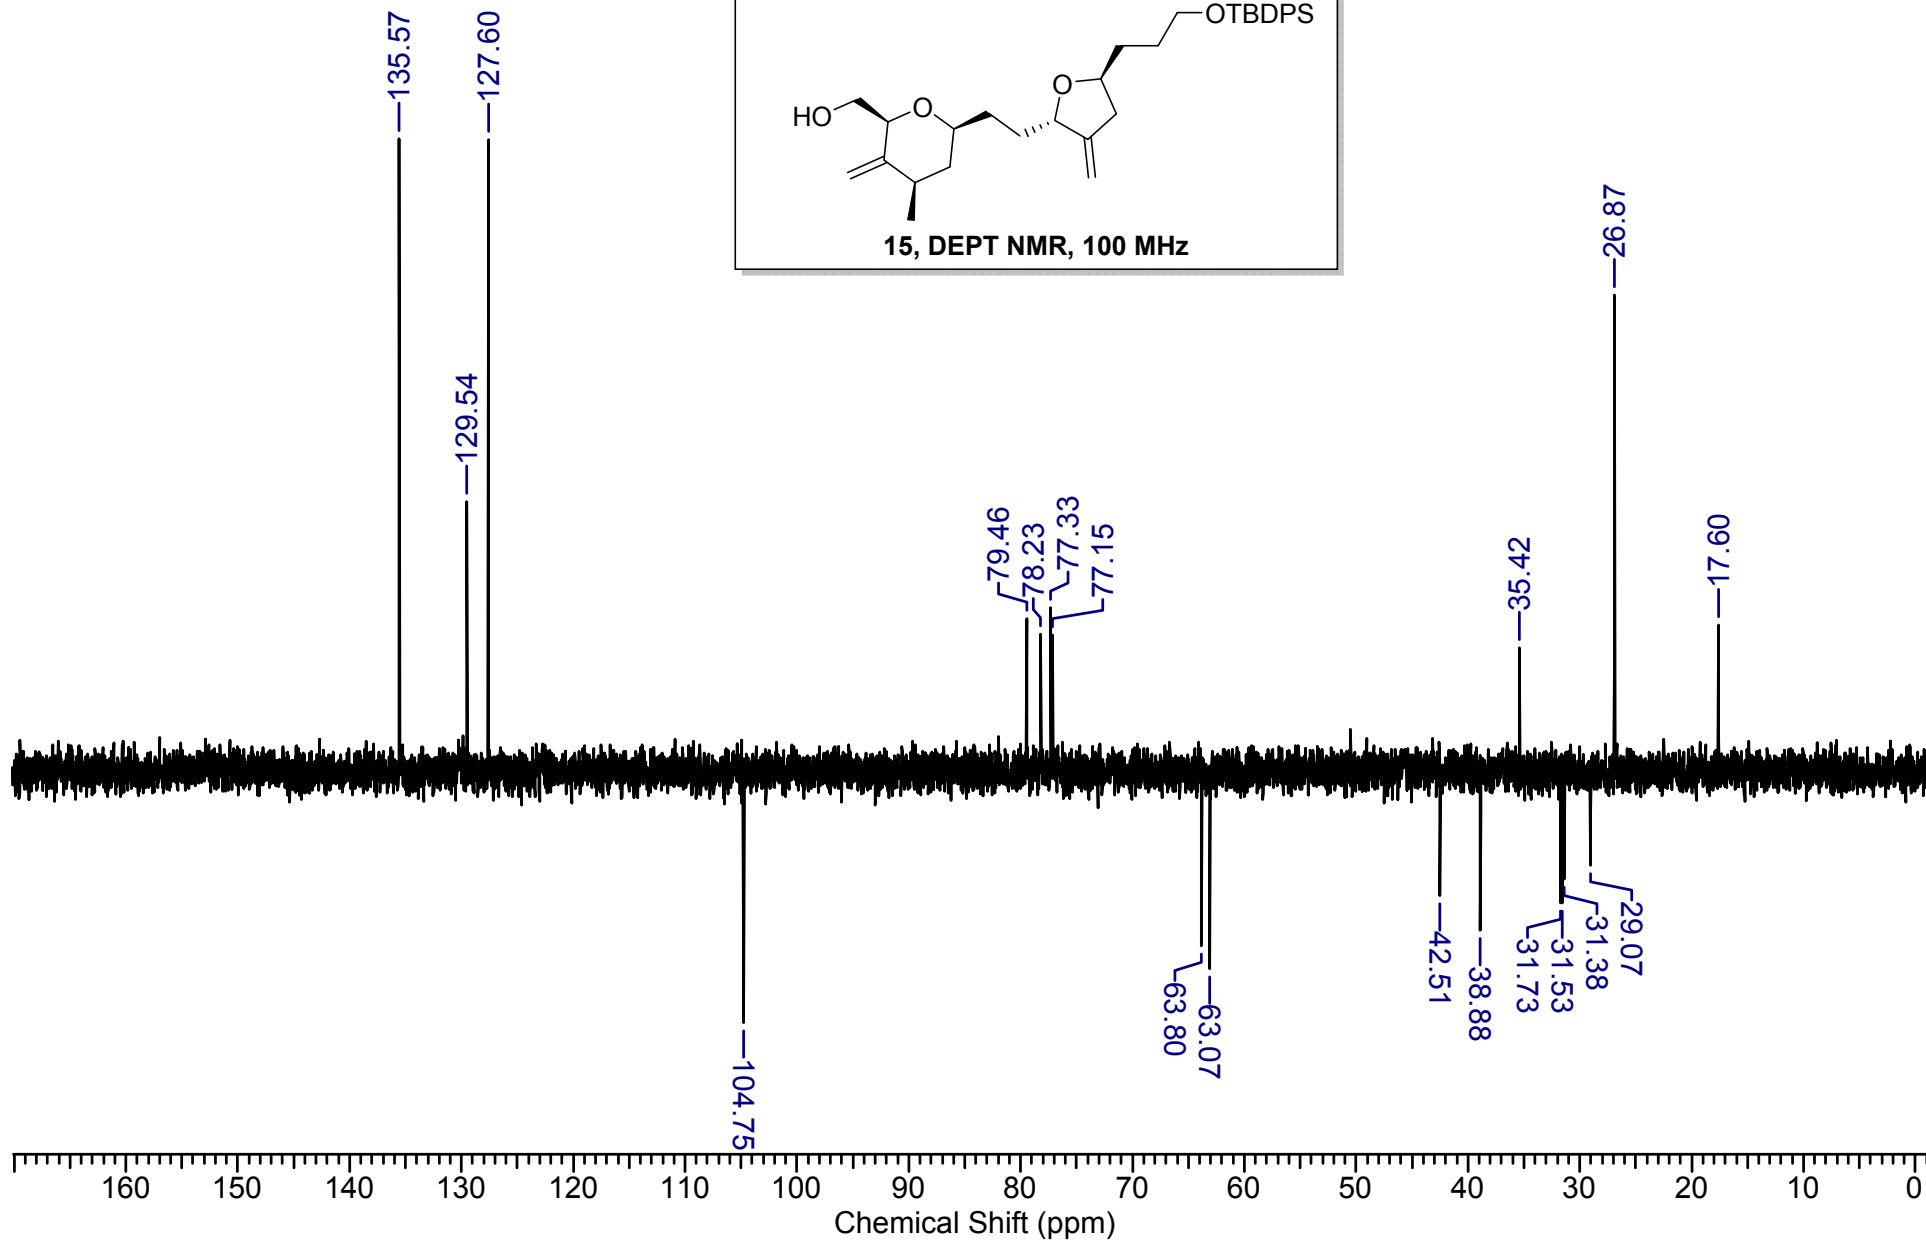



SS-8 #1295 RT: 7.21 AV: 1 NL: 1.91E8  
T: FTMS + p ESI Full ms [100.0000-1500.0000]

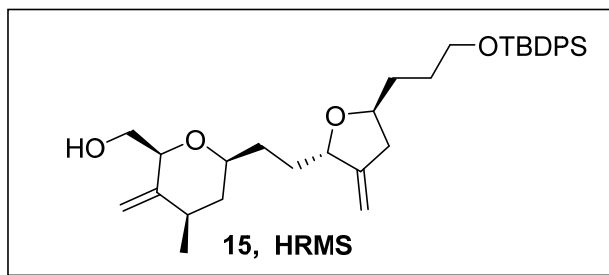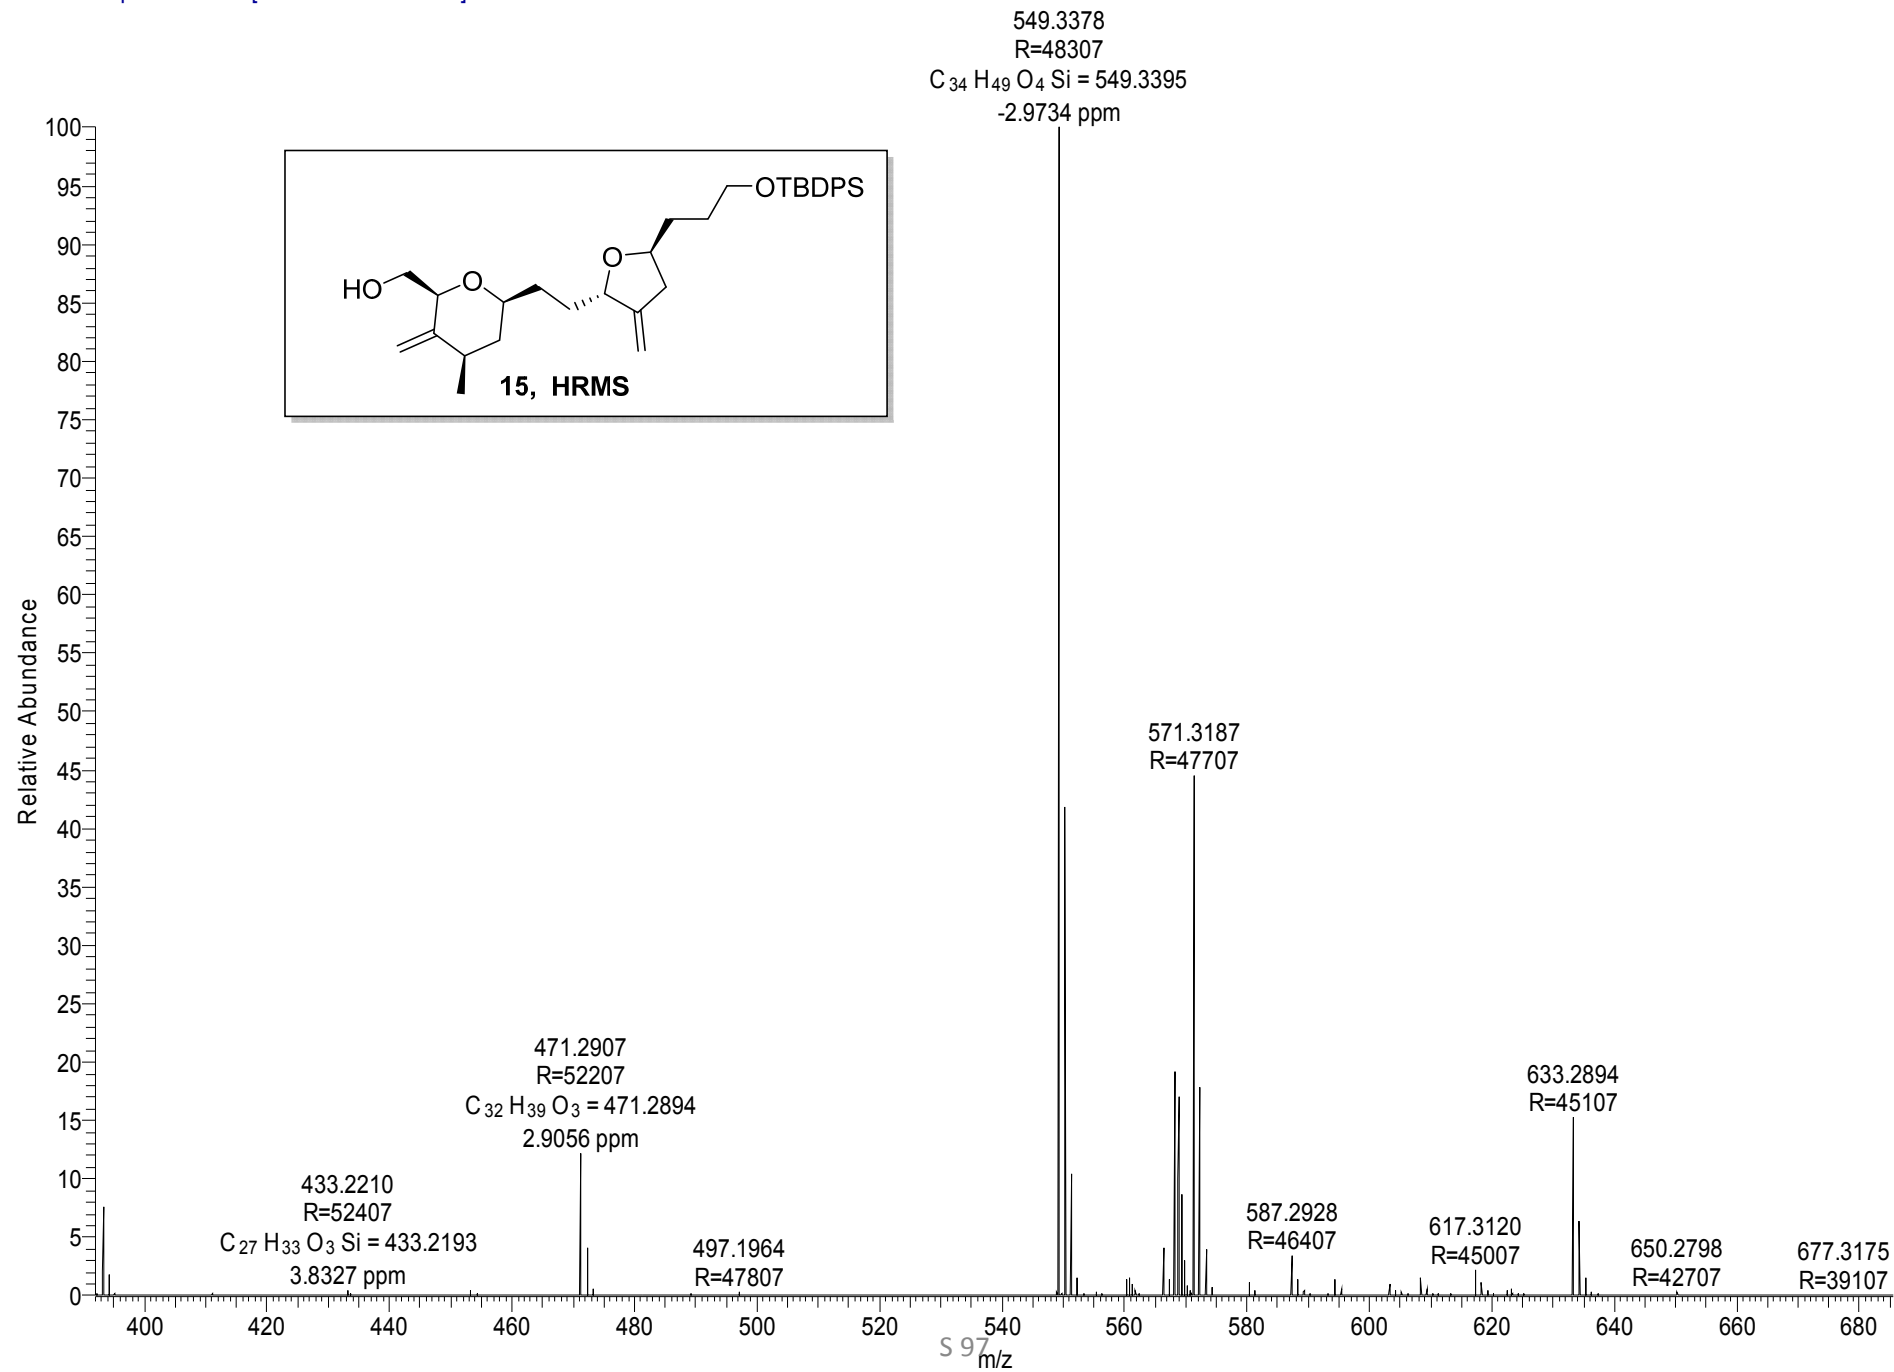

Supplement: d1ob00661d1.pdf [file d1ob00661d1.pdf]
